# Supplementary material for: High-Density SNP Genotyping of Tomato (Solanum lycopersicum L.) Reveals Patterns of Genetic Variation Due to Breeding
Source: PLoS One. 2012 Sep 20;7(9):e45520. doi: 10.1371/journal.pone.0045520 (PMC3447764; doi:10.1371/journal.pone.0045520)
Supplement: Table S3 — Sub-groups within the processing and fresh market germplasm based on PC1 and PC2 of PCA. (XLSX) [file pone.0045520.s005.xlsx]

## Sheet: Table S3
Table S3. Sub-groups within the processing and fresh market germplasm based on PC1 and PC2 of PCA
SolCAP T-number	Genotype	Market Class	Sub-group	PCA
				PC1	PC2
SCT_0002	2K1-2019	Processing	Proc 1	-26.8992	7.78595
SCT_0005	CULBPT04-1	Processing	Proc 1	-16.4	-8.73025
SCT_0007	CULBPT04-3	Processing	Proc 1	-15.6734	-11.2589
SCT_0009	CULBPT04-5	Processing	Proc 1	-14.4657	-11.5176
SCT_0011	CULBPT-05-11	Processing	Proc 1	-7.03797	-9.32823
SCT_0012	CULBPT-05-15	Processing	Proc 1	-14.7726	-19.0864
SCT_0013	CULBPT-05-18	Processing	Proc 1	-13.0439	-6.94986
SCT_0014	CULBPT-05-20	Processing	Proc 1	-12.0565	-5.21641
SCT_0015	CULBPT-05-21	Processing	Proc 1	-12.7295	-13.9212
SCT_0016	CULBPT-05-22	Processing	Proc 1	-17.3302	-13.7387
SCT_0017	CULBPT-05-9	Processing	Proc 1	-11.8363	-9.11713
SCT_0019	E3259	Processing	Proc 1	-26.1044	7.98482
SCT_0022	F03-6331	Processing	Proc 1	-25.5576	5.66407
SCT_0024	F06-1013-1	Processing	Proc 1	-26.6372	-4.3612
SCT_0025	F06-1014-1	Processing	Proc 1	-21.7906	-5.15234
SCT_0026	F06-2041	Processing	Proc 1	-15.1885	3.3196
SCT_0027	F06-2054	Processing	Proc 1	-16.9629	6.4027
SCT_0028	F06-2058	Processing	Proc 1	-21.0686	7.75688
SCT_0029	FG02-188	Processing	Proc 1	-16.9569	-3.27379
SCT_0032	M82	Processing	Proc 1	-24.3457	2.80686
SCT_0033	OH03-6439	Processing	Proc 1	-25.06	6.90648
SCT_0034	OH05-8018	Processing	Proc 1	-26.9648	7.1568
SCT_0035	OH05-8022	Processing	Proc 1	-28.571	7.47852
SCT_0037	OH05-8027	Processing	Proc 1	-31.0084	8.92964
SCT_0039	OH05-8030	Processing	Proc 1	-24.4389	5.84768
SCT_0040	OH05-8036	Processing	Proc 1	-22.8234	5.76766
SCT_0044	OH05-8048	Processing	Proc 1	-25.7917	7.54228
SCT_0045	OH05-8053	Processing	Proc 1	-28.5527	7.10493
SCT_0046	OH05-8059	Processing	Proc 1	-26.6669	7.15351
SCT_0048	OH05-8064	Processing	Proc 1	-27.6625	6.61633
SCT_0049	OH05-8068	Processing	Proc 1	-25.9548	6.42259
SCT_0050	OH05-8069	Processing	Proc 1	-27.0995	8.43841
SCT_0051	OH05-8070	Processing	Proc 1	-25.7428	6.27343
SCT_0054	OH05-8078	Processing	Proc 1	-28.7003	8.42316
SCT_0055	OH05-8079	Processing	Proc 1	-27.7971	6.30882
SCT_0056	OH05-8087	Processing	Proc 1	-26.4189	6.7601
SCT_0057	OH05-8090	Processing	Proc 1	-19.3339	4.28613
SCT_0059	OH05-8104	Processing	Proc 1	-25.6239	6.71344
SCT_0060	OH05-8109	Processing	Proc 1	-26.6344	7.93895
SCT_0061	OH05-8117	Processing	Proc 1	-26.2744	8.20835
SCT_0062	OH05-8124	Processing	Proc 1	-25.5798	7.22274
SCT_0063	OH05-8139	Processing	Proc 1	-26.8764	5.78761
SCT_0064	OH05-8142	Processing	Proc 1	-25.7036	5.29405
SCT_0065	OH05-8144	Processing	Proc 1	-26.4269	7.03189
SCT_0066	OH05-8151	Processing	Proc 1	-25.4735	7.7511
SCT_0067	OH05-8162	Processing	Proc 1	-25.554	6.96911
SCT_0070	OH05-8171	Processing	Proc 1	-27.0034	8.46103
SCT_0072	OH05-8179	Processing	Proc 1	-21.1709	6.27847
SCT_0077	OH05-8187	Processing	Proc 1	-28.7656	7.24942
SCT_0078	OH05-8188	Processing	Proc 1	-26.678	8.11536
SCT_0079	OH05-8192	Processing	Proc 1	-28.2833	5.83265
SCT_0080	OH05-8193	Processing	Proc 1	-27.3454	8.29955
SCT_0082	OH05-8206	Processing	Proc 1	-25.7432	6.82044
SCT_0083	OH05-8210	Processing	Proc 1	-22.7302	5.02442
SCT_0084	OH05-8214	Processing	Proc 1	-26.1837	6.69153
SCT_0085	OH08-5201	Processing	Proc 1	-24.4099	1.14333
SCT_0086	OH08-5202	Processing	Proc 1	-21.5711	-1.70386
SCT_0087	OH08-5203	Processing	Proc 1	-18.4962	6.02812
SCT_0088	OH08-5204	Processing	Proc 1	-19.5004	9.71954
SCT_0089	OH08-5205	Processing	Proc 1	-13.1903	5.64346
SCT_0090	OH08-5206	Processing	Proc 1	-16.8507	5.53071
SCT_0095	OH08-5215	Processing	Proc 1	-11.6587	-0.19615
SCT_0097	OH08-7438	Processing	Proc 1	-12.719	4.55466
SCT_0098	OH08-7439	Processing	Proc 1	-20.6842	-1.41776
SCT_0102	OH08-7459	Processing	Proc 1	-24.5746	-7.29555
SCT_0103	OH08-7460	Processing	Proc 1	-27.2041	-6.62887
SCT_0104	OH08-7466	Processing	Proc 1	-14.4823	-0.596597
SCT_0105	OH08-7469	Processing	Proc 1	-22.7338	-6.81427
SCT_0106	OH08-7470	Processing	Proc 1	-24.823	3.06416
SCT_0113	OH7870	Processing	Proc 1	-22.3017	4.82549
SCT_0115	OH8243	Processing	Proc 1	-24.6071	6.7382
SCT_0116	OH8245	Processing	Proc 1	-26.4206	6.78853
SCT_0117	OH832	Processing	Proc 1	-23.7219	4.83735
SCT_0121	OH8614-1	Processing	Proc 1	-19.2171	-7.13123
SCT_0126	OH981049	Processing	Proc 1	-23.4187	-0.0955993
SCT_0127	OH981067	Processing	Proc 1	-22.1947	-2.89947
SCT_0128	OH981136	Processing	Proc 1	-19.1584	1.30901
SCT_0133	Peto95-43	Processing	Proc 1	-23.6612	-1.91096
SCT_0139	Sun1642	Processing	Proc 1	-24.4124	-2.18708
SCT_0140	UC-204B	Processing	Proc 1	-21.7112	-3.63654
SCT_0141	UC-82	Processing	Proc 1	-24.342	-0.424
SCT_0142	Unilever265	Processing	Proc 1	-24.3204	2.469
SCT_0001	2K1-1439	Processing	Proc 2	-15.7002	15.6908
SCT_0003	2K1-2029	Processing	Proc 2	-10.7626	17.914
SCT_0004	2K1-2054	Processing	Proc 2	-9.74839	15.0305
SCT_0020	E6203	Processing	Proc 2	-7.67118	17.0248
SCT_0021	F02-7530	Processing	Proc 2	-11.5983	13.0542
SCT_0023	F03-7463	Processing	Proc 2	-14.6506	15.8971
SCT_0031	Hunt 100	Processing	Proc 2	3.30132	12.8857
SCT_0036	OH05-8025	Processing	Proc 2	-15.9322	18.8689
SCT_0038	OH05-8028	Processing	Proc 2	-15.1725	19.9898
SCT_0041	OH05-8040	Processing	Proc 2	-19.7047	20.5145
SCT_0042	OH05-8044	Processing	Proc 2	-15.6414	20.8269
SCT_0043	OH05-8046	Processing	Proc 2	-11.4546	18.5782
SCT_0047	OH05-8062	Processing	Proc 2	-16.748	19.4642
SCT_0052	OH05-8072	Processing	Proc 2	-18.2234	20.9505
SCT_0053	OH05-8074	Processing	Proc 2	-15.7575	19.6352
SCT_0058	OH05-8095	Processing	Proc 2	-15.3568	19.6002
SCT_0068	OH05-8163	Processing	Proc 2	-12.655	17.8805
SCT_0069	OH05-8165	Processing	Proc 2	-14.4424	18.5815
SCT_0071	OH05-8175	Processing	Proc 2	-15.4646	20.4133
SCT_0075	OH05-8185	Processing	Proc 2	-21.5444	14.0822
SCT_0076	OH05-8186	Processing	Proc 2	-19.7408	13.4325
SCT_0081	OH05-8197	Processing	Proc 2	-14.7476	19.3518
SCT_0091	OH08-5207	Processing	Proc 2	-7.36697	13.4814
SCT_0092	OH08-5210	Processing	Proc 2	-3.61873	16.0801
SCT_0093	OH08-5211	Processing	Proc 2	-3.47669	16.2498
SCT_0094	OH08-5213	Processing	Proc 2	-12.6143	16.5395
SCT_0099	OH08-7454	Processing	Proc 2	-14.1268	18.5717
SCT_0100	OH08-7457	Processing	Proc 2	-16.5195	18.4966
SCT_0101	OH08-7458	Processing	Proc 2	-7.19177	12.0254
SCT_0107	OH2641	Processing	Proc 2	-8.09532	17.9261
SCT_0108	OH3614	Processing	Proc 2	-14.4861	20.6375
SCT_0109	OH5-8127	Processing	Proc 2	-18.7327	17.6403
SCT_0110	OH5-8157	Processing	Proc 2	-12.3742	19.5249
SCT_0111	OH5-8164	Processing	Proc 2	-15.1489	20.0194
SCT_0112	OH7814	Processing	Proc 2	-1.83084	13.9434
SCT_0114	OH7983	Processing	Proc 2	-10.768	17.3891
SCT_0118	OH8446	Processing	Proc 2	-0.0549169	16.3576
SCT_0119	OH8556	Processing	Proc 2	-10.3721	18.9148
SCT_0120	OH86120	Processing	Proc 2	-10.2743	18.9517
SCT_0122	OH87160	Processing	Proc 2	-14.0143	13.937
SCT_0123	OH88119	Processing	Proc 2	-14.361	14.1272
SCT_0124	OH9241	Processing	Proc 2	-3.78818	14.4479
SCT_0125	OH9242	Processing	Proc 2	-14.8486	19.855
SCT_0129	OH981205	Processing	Proc 2	-8.33458	12.086
SCT_0130	OH987034	Processing	Proc 2	-13.8489	13.7911
SCT_0131	Oroma	Processing	Proc 2	6.52193	15.4171
SCT_0134	R001	Processing	Proc 2	-6.16498	18.3101
SCT_0135	R9812	Processing	Proc 2	2.96517	9.75679
SCT_0136	R996	Processing	Proc 2	3.00948	12.8408
SCT_0137	R997	Processing	Proc 2	-5.01215	15.2707
SCT_0138	Saucy	Processing	Proc 2	5.81343	15.9607
SCT_0478	PS696	Processing	Proc 2	-13.6637	10.7468
SCT_0006	CULBPT04-2	Processing	Outliner	-1.55743	-2.34702
SCT_0008	CULBPT04-4	Processing	Outliner	-7.7501	-21.7694
SCT_0010	CULBPT-05-10	Processing	Outliner	-5.43133	-21.3559
SCT_0018	CULBPT-A46-2	Processing	Outliner	1.71465	-2.25078
SCT_0030	Heinz 1706	Processing	Outliner	18.2573	12.3305
SCT_0096	OH08-5216	Processing	Outliner	7.02678	7.06664
SCT_0132	Pearson	Processing	Outliner	23.5627	5.85039
SCT_0150	091004-15	FreshMarket	FM 1	-1.63281	-29.5924
SCT_0157	091109-3	FreshMarket	FM 1	6.94883	-26.3352
SCT_0159	091120-2	FreshMarket	FM 1	4.12704	-25.4692
SCT_0160	091120-7	FreshMarket	FM 1	2.72261	-25.4228
SCT_0173	Cherokee	FreshMarket	FM 1	8.02025	-31.5705
SCT_0174	Fla. 678	FreshMarket	FM 1	4.69249	-28.2885
SCT_0175	Fla. 701	FreshMarket	FM 1	7.85303	-27.8277
SCT_0176	Fla. 7060	FreshMarket	FM 1	5.99672	-28.2924
SCT_0177	Fla. 726	FreshMarket	FM 1	7.46677	-25.566
SCT_0178	Fla. 7481	FreshMarket	FM 1	4.29063	-29.2316
SCT_0179	Fla. 7547	FreshMarket	FM 1	5.00069	-29.9743
SCT_0180	Fla. 7600	FreshMarket	FM 1	1.40238	-26.3152
SCT_0181	Fla. 7770	FreshMarket	FM 1	6.82813	-28.5212
SCT_0182	Fla. 7771	FreshMarket	FM 1	4.93157	-28.1281
SCT_0183	Fla. 7775	FreshMarket	FM 1	4.16258	-28.5266
SCT_0184	Fla. 7776	FreshMarket	FM 1	10.2378	-26.568
SCT_0185	Fla. 7781	FreshMarket	FM 1	4.65253	-30.592
SCT_0187	Fla. 7907B	FreshMarket	FM 1	2.45999	-24.9063
SCT_0189	Fla. 8000	FreshMarket	FM 1	0.0953419	-24.449
SCT_0190	Fla. 8044	FreshMarket	FM 1	4.54777	-27.5778
SCT_0191	Fla. 8059	FreshMarket	FM 1	5.75804	-25.4772
SCT_0192	Fla. 8083	FreshMarket	FM 1	6.31736	-24.6716
SCT_0193	Fla. 8109	FreshMarket	FM 1	2.81945	-26.3258
SCT_0195	Fla. 8124C	FreshMarket	FM 1	4.11481	-26.8261
SCT_0196	Fla. 8233	FreshMarket	FM 1	2.0037	-27.2232
SCT_0197	Fla. 8249	FreshMarket	FM 1	2.84976	-23.8516
SCT_0198	Fla. 8293	FreshMarket	FM 1	-5.16127	-25.1135
SCT_0199	Fla. 8344	FreshMarket	FM 1	2.86043	-17.6825
SCT_0201	Fla. 8476	FreshMarket	FM 1	1.02754	-28.3652
SCT_0202	Fla. 8516	FreshMarket	FM 1	-0.889126	-31.6017
SCT_0203	Fla. 8539	FreshMarket	FM 1	-3.03416	-18.2827
SCT_0204	Fla. 8543	FreshMarket	FM 1	3.39695	-27.3335
SCT_0205	Fla. 8561B-6	FreshMarket	FM 1	8.1183	-27.1764
SCT_0206	Fla. 8599	FreshMarket	FM 1	2.20191	-29.137
SCT_0207	Fla. 8608	FreshMarket	FM 1	0.445345	-26.676
SCT_0208	Fla. 8624	FreshMarket	FM 1	6.78959	-28.9803
SCT_0211	Fla. 8646	FreshMarket	FM 1	3.42311	-28.578
SCT_0212	Fla. 8653	FreshMarket	FM 1	3.32118	-30.1407
SCT_0215	Flora-Dade	FreshMarket	FM 1	4.04355	-27.9331
SCT_0227	NC123S	FreshMarket	FM 1	2.53498	-31.0978
SCT_0229	NC 13G	FreshMarket	FM 1	-8.76157	-29.8404
SCT_0231	NC161L-1W(2007)	FreshMarket	FM 1	0.725132	-17.4428
SCT_0232	NC1CS	FreshMarket	FM 1	1.17542	-26.604
SCT_0236	NC2Y	FreshMarket	FM 1	2.77115	-27.5498
SCT_0237	NC33EB-1	FreshMarket	FM 1	-2.18087	-30.4218
SCT_0238	NC47NC2	FreshMarket	FM 1	-5.81376	-24.8602
SCT_0239	NC50-7	FreshMarket	FM 1	-3.16178	-27.3296
SCT_0240	NC714-3B(2007)	FreshMarket	FM 1	0.254541	-27.6282
SCT_0241	NC8276	FreshMarket	FM 1	-8.77188	-29.813
SCT_0242	NC8288	FreshMarket	FM 1	-5.25173	-27.6554
SCT_0243	NC84173	FreshMarket	FM 1	-4.85849	-29.4415
SCT_0246	NCEBR-1	FreshMarket	FM 1	0.438579	-30.167
SCT_0249	NCEBR-4	FreshMarket	FM 1	-6.59713	-24.8942
SCT_0253	NCEBR-8	FreshMarket	FM 1	3.9194	-23.7321
SCT_0254	NCHS-1	FreshMarket	FM 1	-4.25251	-18.9911
SCT_0261	PI 564169	FreshMarket	FM 1	-5.29252	-18.0832
SCT_0268	Piedmont	FreshMarket	FM 1	-5.41592	-31.1751
SCT_0272	Summit	FreshMarket	FM 1	-5.65784	-25.9812
SCT_0275	Tropic	FreshMarket	FM 1	9.82153	-26.8739
SCT_0492	NC 1 CELBR	FreshMarket	FM 1	-2.16452	-30.439
SCT_0506	Fla. 8383	FreshMarket	FM 1	-3.4691	-25.076
SCT_0143	071733-1	FreshMarket	FM 2	15.6994	5.93815
SCT_0144	071820-2	FreshMarket	FM 2	16.433	7.30656
SCT_0158	091119-2	FreshMarket	FM 2	8.74412	-13.5027
SCT_0161	091135-1	FreshMarket	FM 2	2.68156	-13.9197
SCT_0162	091144-1	FreshMarket	FM 2	11.8344	-0.504115
SCT_0164	091153-1	FreshMarket	FM 2	12.104	3.04386
SCT_0165	091166-3	FreshMarket	FM 2	12.4496	1.88426
SCT_0172	Campbell 28	FreshMarket	FM 2	8.35717	-6.25403
SCT_0186	Fla. 7804	FreshMarket	FM 2	16.6661	-12.3328
SCT_0188	Fla. 7946	FreshMarket	FM 2	15.5754	-13.6637
SCT_0194	Fla. 8111BH	FreshMarket	FM 2	15.7092	-12.1236
SCT_0209	Fla. 8626	FreshMarket	FM 2	14.4371	-13.4808
SCT_0214	Fla. 8737	FreshMarket	FM 2	12.3864	-8.68255
SCT_0218	LA1996	FreshMarket	FM 2	25.7515	10.2312
SCT_0219	LA2378	FreshMarket	FM 2	20.7714	7.12356
SCT_0220	LA3163	FreshMarket	FM 2	26.5949	11.7448
SCT_0222	LA4425	FreshMarket	FM 2	5.59387	-3.60777
SCT_0224	Legend	FreshMarket	FM 2	22.9028	2.35082
SCT_0225	Medford	FreshMarket	FM 2	25.0451	8.17814
SCT_0226	NC 7 P rep-8 (2006) - 96	FreshMarket	FM 2	11.8806	-3.92964
SCT_0228	NC 13E-1(95)	FreshMarket	FM 2	18.9186	-9.56723
SCT_0230	NC140	FreshMarket	FM 2	22.0008	0.37033
SCT_0233	NC23E-2 (93)	FreshMarket	FM 2	18.9652	-9.51429
SCT_0234	NC265-1(93)-3-4	FreshMarket	FM 2	10.3708	1.72428
SCT_0245	NC99471-3	FreshMarket	FM 2	7.05071	-0.297978
SCT_0247	NCEBR-2	FreshMarket	FM 2	16.6269	-7.51658
SCT_0248	NCEBR-3	FreshMarket	FM 2	17.3624	-9.89624
SCT_0251	NCEBR-6	FreshMarket	FM 2	12.2882	-7.29292
SCT_0252	NCEBR-7	FreshMarket	FM 2	15.82	-2.79317
SCT_0255	Ohio11	FreshMarket	FM 2	20.594	-6.27456
SCT_0256	Ohio MR13	FreshMarket	FM 2	21.956	7.95033
SCT_0258	Oregon Spring	FreshMarket	FM 2	24.6824	10.7757
SCT_0259	Oregon Star	FreshMarket	FM 2	3.9151	15.7371
SCT_0260	P20-3-1	FreshMarket	FM 2	10.8861	-7.81559
SCT_0262	PI 647532	FreshMarket	FM 2	27.1785	12.239
SCT_0264	PI 281553	FreshMarket	FM 2	26.346	10.0465
SCT_0267	PI 65023	FreshMarket	FM 2	25.8362	13.4184
SCT_0269	RioGrande	FreshMarket	FM 2	-12.5315	9.09411
SCT_0270	Severianin	FreshMarket	FM 2	24.2664	12.6542
SCT_0271	Siletz	FreshMarket	FM 2	21.0379	1.88468
SCT_0273	T-5	FreshMarket	FM 2	21.5762	7.32379
SCT_0274	T-9	FreshMarket	FM 2	20.335	6.63328
SCT_0276	UC-MR20	FreshMarket	FM 2	14.4235	1.40577
SCT_0277	UC-N28	FreshMarket	FM 2	20.7301	7.00733
SCT_0278	UC-T338	FreshMarket	FM 2	23.1846	6.44076
SCT_0280	UC-TR51	FreshMarket	FM 2	11.217	8.23667
SCT_0281	Willamette VF	FreshMarket	FM 2	24.585	8.13085
SCT_0486	OH08-6405	FreshMarket	FM 2	27.0557	13.691
SCT_0487	NC98248	FreshMarket	FM 2	12.8057	-5.93924

## Sheet: Table S4
Table S4. Minor allele frequency of 7,310 SNP markers with physical map positions in the sub-populations and sub-groups of the SolCAP germplasm
			Seven sub-populations							Sub-groups within the Proc and FM sub-populations
SNP marker	Chromosome	Physical Position (Mbp)	Processing (Proc)	Fresh market (FM)	Vintage	Cultivated cherry	Landrace	Wild cherry	S. pimpinellifolium	Proc 1	Proc 2	FM 1	FM 2
solcap_snp_sl_15058	1	0.045434	0.0647482	0.269231	0.622642	0.56	0.9	0.775	1	0.037037	0.0980392	0.25	0.295455
solcap_snp_sl_60635	1	0.047132	0	0	0	0.115385	0	0	0.466667	0	0	0	0
solcap_snp_sl_60604	1	0.192109	0	0.0373832	0	0.192308	0	0	0.714286	0	0	0.0491803	0.0217391
solcap_snp_sl_15056	1	0.259974	0.0714286	0.185185	0.438596	0.185185	0.166667	0.0714286	0	0.0493827	0.0961538	0.15	0.229167
solcap_snp_sl_15055	1	0.29955	0.0714286	0.203704	0.473684	0.222222	0.4	0.1	0.0769231	0.0493827	0.0961538	0.183333	0.229167
solcap_snp_sl_15054	1	0.299696	0.0714286	0.203704	0.473684	0.346154	0.4	0.102564	0.533333	0.0493827	0.0961538	0.183333	0.229167
solcap_snp_sl_15052	1	0.301597	0.0714286	0.220183	0.535714	0.384615	0.5	0.166667	0.6	0.0493827	0.0961538	0.196721	0.25
solcap_snp_sl_15051	1	0.301603	0.0714286	0.220183	0.5	0.37037	0.454545	0.102564	0.533333	0.0493827	0.0961538	0.196721	0.25
solcap_snp_sl_15050	1	0.303076	0.0714286	0.205607	0.491525	0.384615	0.4	0.102564	0.533333	0.0493827	0.0961538	0.183333	0.234043
solcap_snp_sl_15049	1	0.303202	0.0714286	0.220183	0.5	0.37037	0.222222	0.0731707	0.428571	0.0493827	0.0961538	0.196721	0.25
CL004303-0524	1	0.310894	0	0.0377358	0	0.2	0.1	0	0.733333	0	0	0.0491803	0.0222222
solcap_snp_sl_24809	1	0.324852	0.165468	0.590476	0.637931	0.384615	0.3	0.216216	0.0625	0.1625	0.115385	0.677966	0.478261
CL016197-0363_solcap_snp_sl_60559	1	0.336495	0	0.0377358	0	0.0833333	0	0.047619	0.714286	0	0	0.0491803	0.0222222
solcap_snp_sl_60557	1	0.338651	0	0.0377358	0	0.12	0	0.047619	0.714286	0	0	0.0491803	0.0222222
solcap_snp_sl_15046	1	0.348201	0.0992908	0.413462	0.0727273	0.25	0.2	0.131579	0.9375	0.121951	0.0192308	0.525424	0.266667
solcap_snp_sl_15039	1	0.48266	0.0921986	0.444444	0.160714	0.32	0.5	0.583333	1	0.121951	0	0.540984	0.319149
solcap_snp_sl_33745	1	0.534448	0.0214286	0.111111	0.362069	0.56	0.7	0.820513	1	0.0246914	0.0192308	0.0819672	0.148936
solcap_snp_sl_60513	1	0.541692	0.244444	0.361111	0.385965	0.592593	0.8	0.875	1	0.125	0.458333	0.278689	0.468085
solcap_snp_sl_24801	1	0.663658	0.358779	0.373832	0.36	0.6	0.75	0.825	1	0.177215	0.711111	0.266667	0.510638
solcap_snp_sl_24799	1	0.669686	0.373134	0.320755	0.415094	0.4	0.8	0.783784	0.0625	0.1875	0.723404	0.233333	0.434783
solcap_snp_sl_24797	1	0.678452	0.363636	0.373832	0.407407	0.576923	0.8	0.902439	1	0.177215	0.717391	0.266667	0.510638
CL017102-0111	1	0.730154	0.0283688	0.0181818	0.25	0.296296	0.555556	0.384615	0	0.0365854	0.0192308	0	0.0408163
solcap_snp_sl_33737	1	0.8537	0.0283688	0.0545455	0.326923	0.346154	0.363636	0.540541	0	0.0365854	0.0192308	0.0327869	0.0816327
solcap_snp_sl_33736	1	0.859321	0	0.0275229	0.0163934	0	0	0.125	0	0	0	0.0166667	0.0408163
solcap_snp_sl_60446	1	0.876224	0	0	0	0.115385	0	0	0.428571	0	0	0	0
solcap_snp_sl_24794	1	0.906718	0.383459	0.214953	0.385965	0.615385	0.666667	0.902439	1	0.2125	0.717391	0.0833333	0.382979
solcap_snp_sl_60417	1	0.986514	0	0.0555556	0	0.125	0.0833333	0.157895	0.9375	0	0	0.0491803	0.0638298
solcap_snp_sl_20500	1	1.08689	0.0507246	0.00909091	0.1	0.111111	0	0.0232558	0	0.075	0.0196078	0	0.0204082
solcap_snp_sl_20499	1	1.1164	0.416667	0.268519	0.473684	0.68	0.5	0.722222	1	0.265823	0.717391	0.131148	0.446809
solcap_snp_sl_60393	1	1.11887	0	0.0550459	0	0.148148	0.0909091	0.0238095	0.714286	0	0	0.0491803	0.0625
solcap_snp_sl_60360	1	1.33777	0	0.0555556	0	0.12	0.222222	0.05	0.9375	0	0	0.0491803	0.0638298
solcap_snp_sl_60356	1	1.36702	0	0	0	0.0740741	0	0	0.3125	0	0	0	0
solcap_snp_sl_8704	1	1.47086	0.234848	0.28972	0.111111	0.461538	0.571429	0.72973	1	0.15	0.377778	0.186441	0.416667
solcap_snp_sl_33719	1	1.5082	0.0070922	0.0272727	0.125	0.16	0.0909091	0.225	0.0625	0	0	0	0.0612245
solcap_snp_sl_60330	1	1.51138	0.0359712	0.0550459	0	0.0769231	0	0.0789474	0.857143	0.0625	0	0.0491803	0.0625
solcap_snp_sl_60318	1	1.52433	0.0359712	0.0555556	0	0.12	0.0909091	0.135135	0.9375	0.0625	0	0.0491803	0.0638298
solcap_snp_sl_8697	1	1.55072	0.035461	0.165138	0.0333333	0.111111	0.1	0.214286	0	0.0365854	0.0192308	0.114754	0.229167
solcap_snp_sl_33709	1	1.57739	0.164179	0.155963	0.293103	0.423077	0.6	0.676471	0.266667	0.0493827	0.369565	0.131148	0.1875
solcap_snp_sl_60303	1	1.60569	0	0.0555556	0	0.12	0.222222	0.0769231	0.9375	0	0	0.0491803	0.0638298
solcap_snp_sl_60296	1	1.67868	0	0.0555556	0	0.08	0.0833333	0.075	0.857143	0	0	0.0491803	0.0638298
solcap_snp_sl_60276	1	1.80937	0	0.0462963	0	0.115385	0.0833333	0.1	0.785714	0	0	0.0491803	0.0425532
solcap_snp_sl_33701	1	2.06352	0.2	0.32381	0.446429	0.307692	0.285714	0.325	0	0.0886076	0.408163	0.288136	0.369565
solcap_snp_sl_60250	1	2.11711	0.0647482	0	0	0.0740741	0	0.0263158	0.714286	0.0864198	0	0	0
solcap_snp_sl_24789	1	2.13554	0.0970149	0.0454545	0.0677966	0.0416667	0	0.0697674	0	0.0126582	0.25	0.0163934	0.0816327
solcap_snp_sl_60227	1	2.20086	0.057554	0	0	0.04	0	0	0.571429	0.0864198	0	0	0
solcap_snp_sl_8669	1	2.25588	0.183824	0.308411	0.527273	0.384615	0.25	0.25641	0	0.227848	0.12	0.35	0.255319
solcap_snp_sl_8668	1	2.31163	0.183824	0.261682	0.491228	0.384615	0.25	0.225	0	0.227848	0.12	0.305085	0.208333
solcap_snp_sl_8667	1	2.31176	0.189781	0.261682	0.517857	0.384615	0.25	0.225	0	0.2375	0.12	0.305085	0.208333
solcap_snp_sl_24787	1	2.37187	0.183824	0.252336	0.45283	0.384615	0.142857	0.275	0	0.227848	0.12	0.271186	0.229167
solcap_snp_sl_60160	1	2.39503	0.0652174	0	0	0.0740741	0.2	0.05	0.571429	0.1	0	0	0
SL20259_223	1	2.44183	0.484375	0.619048	0.518519	0.416667	0.375	0.289474	0	0.346667	0.702128	0.62069	0.617021
CL009286-0792	1	2.44243	0.515625	0.38835	0.52	0.636364	0.714286	0.605263	0.5	0.653333	0.297872	0.37931	0.4
solcap_snp_sl_24785	1	2.44449	0.484375	0.613208	0.45614	0.363636	0.333333	0.289474	0	0.346667	0.702128	0.616667	0.608696
solcap_snp_sl_8659	1	2.44562	0.51938	0.388889	0.525424	0.583333	0.666667	0.605263	0.5	0.657895	0.297872	0.393443	0.382979
solcap_snp_sl_8658	1	2.44595	0.467213	0.377358	0.5	0.545455	0.625	0.564103	0.5	0.594203	0.297872	0.37931	0.375
solcap_snp_sl_8657	1	2.44638	0.515625	0.384615	0.529412	0.636364	0.714286	0.578947	0.5	0.653333	0.297872	0.372881	0.4
solcap_snp_sl_8656	1	2.44652	0.435115	0.386792	0.534483	0.454545	0.375	0.5	0.0625	0.532468	0.297872	0.389831	0.382979
solcap_snp_sl_8655	1	2.44673	0.435115	0.383178	0.534483	0.434783	0.285714	0.5	0.0625	0.532468	0.297872	0.389831	0.375
solcap_snp_sl_8654	1	2.45808	0.484375	0.632075	0.464286	0.391304	0.428571	0.342105	0	0.346667	0.702128	0.616667	0.652174
solcap_snp_sl_8653	1	2.46163	0.51938	0.373832	0.54386	0.608696	0.625	0.621622	0.428571	0.657895	0.297872	0.383333	0.361702
solcap_snp_sl_8651	1	2.46325	0.431818	0.367925	0.490909	0.5	0.571429	0.526316	0.133333	0.532468	0.291667	0.389831	0.340426
SGN-U573329_snp393	1	2.47612	0.0652174	0	0	0.0769231	0.2	0.125	0.285714	0.1	0	0	0
solcap_snp_sl_60143	1	2.50774	0.0652174	0	0	0.115385	0.2	0.15	0.9375	0.1	0	0	0
solcap_snp_sl_8640	1	2.55437	0.035461	0.0186916	0.509091	0.25	0.111111	0.325	0.0625	0.0243902	0.0384615	0	0.0434783
solcap_snp_sl_60135	1	2.57281	0.0729927	0	0	0.0740741	0	0	0.733333	0.101266	0.0192308	0	0
solcap_snp_sl_15014	1	2.57489	0.109489	0.0280374	0.48	0.333333	0	0.486486	0.933333	0.126582	0.0576923	0	0.0652174
solcap_snp_sl_8639	1	2.58171	0.035461	0.0188679	0.480769	0.291667	0	0.365854	0.0625	0.0243902	0.0384615	0	0.0444444
solcap_snp_sl_15013	1	2.73078	0.195652	0.179245	0.118644	0.125	0.222222	0	0	0.209877	0.176471	0.241379	0.104167
solcap_snp_sl_60113	1	2.75137	0	0	0	0.0384615	0	0	0.266667	0	0	0	0
solcap_snp_sl_60089	1	2.87916	0	0.00917431	0	0.0769231	0	0.131579	0.875	0	0	0	0.0208333
solcap_snp_sl_60078	1	2.9556	0.189394	0.0917431	0.20339	0.32	0	0.238095	0	0.0909091	0.326531	0.0655738	0.125
solcap_snp_sl_33686	1	3.00327	0	0	0.0327869	0.0740741	0	0.0232558	0	0	0	0	0
solcap_snp_sl_60043	1	3.10194	0	0	0	0	0	0.0487805	0.866667	0	0	0	0
solcap_snp_sl_60029	1	3.17321	0	0	0	0	0	0.0243902	0.125	0	0	0	0
solcap_snp_sl_60008	1	3.25523	0	0	0	0.0769231	0	0.025641	0.8125	0	0	0	0
solcap_snp_sl_59975	1	3.48608	0	0	0	0.08	0	0.105263	0.666667	0	0	0	0
solcap_snp_sl_59964	1	3.59131	0	0	0	0.0384615	0	0.0512821	0.9375	0	0	0	0
solcap_snp_sl_20440	1	3.69448	0.233577	0.247619	0.0689655	0.04	0	0.0232558	0	0.225	0.176471	0.366667	0.0888889
solcap_snp_sl_59944	1	3.69575	0	0.00925926	0	0	0	0.075	0.933333	0	0	0	0.0212766
solcap_snp_sl_59923	1	3.84268	0	0	0	0	0	0	0.25	0	0	0	0
solcap_snp_sl_20438	1	3.89974	0.0070922	0.0550459	0.15	0.333333	0.545455	0.470588	1	0	0	0.0491803	0.0625
solcap_snp_sl_59913	1	4.15642	0	0.00909091	0	0	0	0.0243902	0.466667	0	0	0	0.0204082
solcap_snp_sl_59897	1	4.40478	0	0	0	0	0	0.0243902	0.357143	0	0	0	0
solcap_snp_sl_59890	1	4.59795	0	0	0	0.04	0	0	0.857143	0	0	0	0
CL015771-0679	1	4.61254	0	0	0	0	0	0	0	0	0	0	0
solcap_snp_sl_59885	1	4.66944	0	0	0	0	0	0	0.333333	0	0	0	0
solcap_snp_sl_33677	1	4.87134	0	0.00925926	0.0545455	0.25	0	0.564103	1	0	0	0	0.0212766
solcap_snp_sl_33676	1	4.94068	0.185185	0.111111	0.442308	0.590909	0.1	0.846154	1	0.151899	0.244898	0.0163934	0.234043
solcap_snp_sl_59869	1	4.9487	0	0	0	0	0	0	0.666667	0	0	0	0
solcap_snp_sl_59817	1	5.08745	0	0	0.0491803	0.0384615	0	0.0555556	0.9375	0	0	0	0
solcap_snp_sl_59806	1	5.34003	0	0	0	0.0384615	0.0833333	0.0263158	0.8	0	0	0	0
solcap_snp_sl_20426	1	5.34699	0.0141844	0.190909	0.472727	0.791667	0.4	0.952381	1	0.0121951	0	0.0655738	0.346939
solcap_snp_sl_59801	1	5.36466	0	0	0	0.0416667	0	0.025	0.933333	0	0	0	0
solcap_snp_sl_59784	1	5.72652	0	0	0	0.04	0	0.0540541	0.733333	0	0	0	0
solcap_snp_sl_59778	1	5.82325	0	0	0	0	0	0	0.5	0	0	0	0
solcap_snp_sl_59771	1	6.22966	0.183824	0.266055	0.407407	0.173913	0	0.0769231	0	0.0625	0.346939	0.163934	0.395833
solcap_snp_sl_59768	1	6.30686	0	0	0	0	0	0	0.230769	0	0	0	0
solcap_snp_sl_59756	1	6.35741	0	0	0	0	0	0	0.333333	0	0	0	0
solcap_snp_sl_59754	1	6.84063	0	0	0	0.04	0.1	0.102564	0.9375	0	0	0	0
solcap_snp_sl_20420	1	6.84379	0	0.0909091	0.320755	0.73913	0.25	0.897436	1	0	0	0	0.204082
solcap_snp_sl_59748	1	7.57671	0	0	0	0.04	0.0909091	0.114286	1	0	0	0	0
solcap_snp_sl_59745	1	7.61709	0	0	0	0	0	0.025	0.8125	0	0	0	0
solcap_snp_sl_33669	1	8.68543	0	0	0	0.192308	0	0.292683	0.0625	0	0	0	0
solcap_snp_sl_41307	1	11.7593	0	0	0	0	0	0	0.0625	0	0	0	0
solcap_snp_sl_41302	1	11.9279	0	0	0	0.04	0.1	0.102564	0.9375	0	0	0	0
solcap_snp_sl_27082	1	15.5869	0	0	0	0.192308	0	0.292683	0.0625	0	0	0	0
solcap_snp_sl_41286	1	16.8103	0	0	0	0	0	0.025	0.8	0	0	0	0
solcap_snp_sl_16925	1	18.5193	0	0.0825688	0.313725	0.28	0	0.230769	0	0	0	0	0.1875
solcap_snp_sl_41282	1	18.5233	0	0	0	0	0	0.025	0.8	0	0	0	0
solcap_snp_sl_51462	1	19.49	0	0	0	0.12	0.181818	0.135135	0.9375	0	0	0	0
solcap_snp_sl_51466	1	26.8519	0	0	0	0	0	0.0769231	0.866667	0	0	0	0
solcap_snp_sl_51469	1	26.8523	0	0	0	0	0	0.0769231	0.866667	0	0	0	0
solcap_snp_sl_30350	1	26.8525	0	0	0	0	0	0	0	0	0	0	0
solcap_snp_sl_51474	1	27.9847	0	0	0	0	0	0	0.0625	0	0	0	0
solcap_snp_sl_66077	1	32.8507	0	0	0	0	0	0.0769231	0.866667	0	0	0	0
solcap_snp_sl_51990	1	33.6838	0	0	0	0	0	0.0769231	0.866667	0	0	0	0
solcap_snp_sl_51992	1	33.9064	0	0	0	0	0	0.0769231	0.866667	0	0	0	0
solcap_snp_sl_56061	1	35.6496	0	0	0	0	0	0.0769231	0.866667	0	0	0	0
solcap_snp_sl_52623	1	37.5484	0	0	0	0	0	0.0769231	0.866667	0	0	0	0
solcap_snp_sl_19066	1	38.1185	0	0.0909091	0.307692	0.73913	0.25	0.897436	1	0	0	0	0.204082
solcap_snp_sl_52631	1	38.1188	0	0	0	0	0	0	0.0666667	0	0	0	0
solcap_snp_sl_14042	1	38.2749	0.182482	0.372727	0.741379	0.888889	0.5	0.976744	1	0.0625	0.34	0.163934	0.632653
solcap_snp_sl_19068	1	38.2763	0	0.0825688	0.288462	0.28	0	0.230769	0	0	0	0	0.1875
solcap_snp_sl_52641	1	38.3216	0	0	0	0.12	0.181818	0.135135	0.9375	0	0	0	0
solcap_snp_sl_52646	1	39.1418	0	0	0	0	0	0.0769231	0.866667	0	0	0	0
solcap_snp_sl_41433	1	40.683	0	0	0	0	0	0.0769231	0.866667	0	0	0	0
solcap_snp_sl_41438	1	40.9099	0	0	0	0	0	0.0769231	0.866667	0	0	0	0
CL009029-0054	1	41.8695	0	0	0	0	0	0	0	0	0	0	0
SL10106_923	1	41.8699	0	0.00909091	0	0	0	0.0769231	0.875	0	0	0	0.0204082
solcap_snp_sl_41445	1	42.5287	0	0	0	0	0	0.0526316	0.866667	0	0	0	0
solcap_snp_sl_39021	1	46.1956	0	0	0	0.04	0	0.0769231	0.875	0	0	0	0
hp2_exon2_11_b	1	46.4981	0	0	0	0.0769231	0	0.0232558	0	0	0	0	0
solcap_snp_sl_16520	1	46.5438	0	0.0825688	0.316667	0.269231	0.166667	0.230769	0	0	0	0	0.1875
solcap_snp_sl_16519	1	46.5439	0	0.0909091	0.280702	0.708333	0.222222	0.871795	1	0	0	0	0.204082
solcap_snp_sl_39018	1	46.552	0	0	0	0.136364	0.181818	0.135135	0.933333	0	0	0	0
solcap_snp_sl_70304	1	47.929	0	0	0	0	0	0.0769231	0.866667	0	0	0	0
solcap_snp_sl_70307	1	48.8349	0	0	0	0	0	0.025	0.8	0	0	0	0
solcap_snp_sl_70309	1	49.1923	0	0	0	0	0	0.0769231	0.866667	0	0	0	0
solcap_snp_sl_70310	1	49.4497	0	0	0	0	0	0.0769231	0.866667	0	0	0	0
solcap_snp_sl_70311	1	49.8888	0	0	0	0	0	0.0769231	0.866667	0	0	0	0
solcap_snp_sl_70312	1	50.7656	0	0	0	0.04	0	0.0769231	0.875	0	0	0	0
solcap_snp_sl_70320	1	51.2707	0	0	0	0	0	0.0769231	0.866667	0	0	0	0
solcap_snp_sl_22423	1	52.3367	0	0.0825688	0.316667	0.269231	0.0909091	0.236842	0	0	0	0	0.1875
solcap_snp_sl_70323	1	52.3367	0	0	0	0	0	0.0526316	0.866667	0	0	0	0
solcap_snp_sl_70327	1	52.7316	0	0	0	0	0	0.0769231	0.866667	0	0	0	0
solcap_snp_sl_70332	1	54.5088	0	0	0	0	0	0	0.6	0	0	0	0
solcap_snp_sl_70336	1	55.5764	0	0	0	0	0	0	0.363636	0	0	0	0
solcap_snp_sl_70337	1	56.5225	0	0	0	0	0	0.0769231	0.866667	0	0	0	0
solcap_snp_sl_70344	1	57.0662	0	0	0	0.12	0.181818	0.135135	0.9375	0	0	0	0
solcap_snp_sl_70345	1	57.2229	0	0	0	0.04	0.1	0.102564	0.9375	0	0	0	0
solcap_snp_sl_70347	1	57.8546	0.176471	0.190909	0.169492	0.125	0	0	0	0.0625	0.346939	0.131148	0.265306
solcap_snp_sl_70348	1	58.3421	0	0	0	0	0	0.0789474	0.933333	0	0	0	0
solcap_snp_sl_70358	1	58.7877	0	0	0	0	0	0	0.0625	0	0	0	0
solcap_snp_sl_37014	1	59.2558	0	0	0	0.192308	0	0.268293	0.0625	0	0	0	0
solcap_snp_sl_70365	1	59.3842	0	0	0	0	0	0.0769231	0.866667	0	0	0	0
solcap_snp_sl_70368	1	60.3649	0	0	0	0	0	0.0238095	0.4	0	0	0	0
solcap_snp_sl_70371	1	60.822	0	0	0	0	0	0.0769231	0.866667	0	0	0	0
solcap_snp_sl_70374	1	60.8485	0	0	0	0	0	0	0.0625	0	0	0	0
solcap_snp_sl_38790	1	61.4784	0	0	0	0	0	0.0769231	0.866667	0	0	0	0
solcap_snp_sl_38789	1	61.7249	0	0	0	0	0	0	0.0625	0	0	0	0
solcap_snp_sl_16466	1	61.7253	0	0.0825688	0.290909	0.28	0	0.230769	0	0	0	0	0.1875
solcap_snp_sl_38787	1	61.7332	0	0	0	0	0	0.0487805	0.428571	0	0	0	0
solcap_snp_sl_38782	1	62.1611	0	0	0	0.0384615	0	0.05	0.333333	0	0	0	0
solcap_snp_sl_26417	1	62.269	0	0.0917431	0.322034	0.73913	0.333333	0.897436	1	0	0	0	0.204082
solcap_snp_sl_38773	1	62.3576	0	0	0	0	0	0.0243902	0.642857	0	0	0	0
solcap_snp_sl_38771	1	62.4944	0	0	0	0	0.1	0.102564	0.9375	0	0	0	0
solcap_snp_sl_38764	1	62.8126	0	0	0	0	0	0	0.428571	0	0	0	0
solcap_snp_sl_18641	1	64.6847	0.176471	0.190909	0.240741	0.125	0.1	0.1	0	0.0625	0.346939	0.131148	0.265306
CL015959-0346	1	66.6439	0	0	0	0	0	0	0	0	0	0	0
solcap_snp_sl_18635	1	67.0378	0	0.0917431	0.275862	0.346154	0	0.210526	0	0	0	0.0163934	0.1875
solcap_snp_sl_18634	1	67.3664	0	0.0909091	0.333333	0.296296	0.166667	0.210526	0	0	0	0.0163934	0.183673
solcap_snp_sl_50596	1	67.4099	0	0	0	0	0	0.0512821	0.533333	0	0	0	0
solcap_snp_sl_50589	1	67.4841	0	0	0	0.0384615	0.111111	0.138889	0.9375	0	0	0	0
solcap_snp_sl_18627	1	67.5123	0	0.0925926	0.396226	0.307692	0.181818	0.210526	0	0	0	0.0163934	0.191489
solcap_snp_sl_50576	1	67.7401	0	0	0	0	0	0.075	0.571429	0	0	0	0
solcap_snp_sl_30142	1	67.7407	0	0	0	0.0769231	0	0.214286	0	0	0	0	0
solcap_snp_sl_50571	1	67.801	0	0	0	0	0	0	0.25	0	0	0	0
solcap_snp_sl_13762	1	67.8555	0.25	0.472222	0.309091	0.5	0.2	0.794872	1	0.151899	0.34	0.491803	0.446809
solcap_snp_sl_50561	1	68.1051	0	0	0	0	0	0	0.466667	0	0	0	0
solcap_snp_sl_18619	1	68.2329	0.169118	0.4	0.8	0.92	0.5	0.976744	1	0.0625	0.326531	0.114754	0.755102
solcap_snp_sl_50542	1	68.27	0	0	0	0.0384615	0	0.05	0.875	0	0	0	0
solcap_snp_sl_50534	1	68.6734	0	0	0	0	0	0	0.2	0	0	0	0
solcap_snp_sl_30135	1	68.7479	0	0.0183486	0.0847458	0.44	0.272727	0.675	1	0	0	0	0.0416667
CL016155-0185	1	68.7728	0	0	0	0	0	0	0	0	0	0	0
solcap_snp_sl_30133	1	68.773	0	0	0	0.0769231	0	0.184211	0	0	0	0	0
solcap_snp_sl_50504	1	68.9042	0	0	0	0	0	0	0.285714	0	0	0	0
solcap_snp_sl_50495	1	68.9443	0	0	0	0	0	0.0789474	0.866667	0	0	0	0
CL015442-1034	1	69.0464	0	0	0	0	0	0	0	0	0	0	0
solcap_snp_sl_50477	1	69.0778	0	0.00909091	0	0.04	0	0.128205	0.9375	0	0	0	0.0204082
solcap_snp_sl_50470	1	69.1688	0	0	0	0	0	0	0.375	0	0	0	0
solcap_snp_sl_50467	1	69.2317	0	0.00909091	0	0.115385	0.272727	0.179487	0.785714	0	0	0	0.0204082
solcap_snp_sl_50464	1	69.3339	0	0.00909091	0	0.04	0	0.157895	0.875	0	0	0	0.0204082
solcap_snp_sl_30125	1	69.4569	0	0	0	0	0	0.139535	0	0	0	0	0
solcap_snp_sl_50458	1	69.46	0	0.00909091	0	0	0	0.131579	0.8	0	0	0	0.0204082
solcap_snp_sl_30116	1	69.658	0.0928571	0.0833333	0.137931	0.12	0	0.325581	0	0.0493827	0.153846	0.0327869	0.148936
solcap_snp_sl_4963	1	69.685	0.0780142	0.154545	0.0333333	0	0.0909091	0	0	0.0853659	0	0.213115	0.0816327
solcap_snp_sl_50427	1	69.75	0	0.00909091	0	0.04	0.111111	0.128205	0.875	0	0	0	0.0204082
solcap_snp_sl_30114	1	69.7508	0.0928571	0.1	0.152542	0	0	0.317073	0	0.0493827	0.153846	0.0327869	0.183673
solcap_snp_sl_30111	1	70.0923	0	0.0181818	0	0.291667	0.2	0.432432	1	0	0	0	0.0408163
SL20127_1427	1	70.1044	0	0.00909091	0	0	0	0.025641	0.642857	0	0	0	0.0204082
solcap_snp_sl_50373	1	70.2213	0	0	0	0.04	0	0.0243902	0.642857	0	0	0	0
2325_3_327_b_2325_3_314	1	70.2627	0.15	0.00909091	0.0163934	0.037037	0	0	0.25	0.182927	0.0384615	0	0.0204082
2325_3_363_b_2325_3_350_solcap_snp_sl_70013	1	70.2627	0	0	0	0	0	0	0	0	0	0	0
solcap_snp_sl_36902	1	70.3644	0.195652	0.0272727	0.0163934	0.0416667	0	0.205128	0.9375	0.2	0.134615	0	0.0612245
solcap_snp_sl_70031	1	70.4277	0.195652	0.0272727	0.0163934	0.12	0	0.162162	0.933333	0.2	0.134615	0	0.0612245
Le005879_466	1	70.5173	0.208633	0.0272727	0.0163934	0.0833333	0.0909091	0.184211	0.933333	0.222222	0.134615	0	0.0612245
SL10483_141	1	70.5207	0.202899	0.0272727	0.0163934	0.16	0.0909091	0.205128	0.9375	0.2125	0.134615	0	0.0612245
solcap_snp_sl_36963	1	70.5798	0.210145	0.0272727	0.0163934	0.153846	0	0.195122	0.625	0.225	0.134615	0	0.0612245
solcap_snp_sl_37999	1	70.6813	0	0	0	0	0	0	0.538462	0	0	0	0
solcap_snp_sl_25912	1	70.8663	0	0	0	0.0384615	0	0.255814	0	0	0	0	0
solcap_snp_sl_25914	1	70.8684	0	0.00909091	0	0.08	0	0.435897	0.933333	0	0	0	0.0204082
solcap_snp_sl_22691	1	70.9536	0.255474	0	0	0	0	0	0	0.225	0.34	0	0
solcap_snp_sl_25918	1	70.9971	0	0	0	0	0	0.166667	0	0	0	0	0
solcap_snp_sl_38059	1	71.0113	0	0.00909091	0	0.0769231	0	0.0769231	0.866667	0	0	0	0.0204082
solcap_snp_sl_38078	1	71.0878	0	0.00909091	0	0.08	0	0.105263	0.9375	0	0	0	0.0204082
solcap_snp_sl_456	1	71.0906	0.224638	0.614679	0.5	0.64	0.714286	0.25	0	0.278481	0.0576923	0.766667	0.428571
solcap_snp_sl_457	1	71.1866	0.233577	0.669725	0.775862	0.583333	0.5	0.65	0.0625	0.291139	0.0588235	0.816667	0.489796
solcap_snp_sl_38096	1	71.216	0	0	0	0.04	0.1	0.121951	0.266667	0	0	0	0
solcap_snp_sl_25922	1	71.4237	0	0.00909091	0.0163934	0.333333	0.4	0.707317	1	0	0	0	0.0204082
solcap_snp_sl_38116	1	71.4335	0	0	0.0163934	0.230769	0	0.236842	0.266667	0	0	0	0
solcap_snp_sl_38119	1	71.4374	0	0	0	0	0	0	0.1875	0	0	0	0
solcap_snp_sl_38123	1	71.4768	0.231884	0.679245	0.517241	0.44	0.2	0.475	0	0.278481	0.0769231	0.862069	0.458333
solcap_snp_sl_38126	1	71.4783	0	0.00909091	0	0.0384615	0.1	0.0769231	0.9375	0	0	0	0.0204082
solcap_snp_sl_469	1	71.5151	0.231884	0.698113	0.482143	0.68	0.5	0.512195	1	0.278481	0.0769231	0.864407	0.489362
solcap_snp_sl_25926	1	71.6423	0	0.00909091	0	0.08	0.181818	0.435897	1	0	0	0	0.0204082
solcap_snp_sl_25929	1	71.7344	0	0.0363636	0.206897	0.0833333	0.4	0.341463	0.0625	0	0	0.0163934	0.0612245
solcap_snp_sl_25930	1	71.7556	0	0.0277778	0.206897	0.0434783	0.333333	0.4	0.0625	0	0	0	0.0625
solcap_snp_sl_25931	1	71.7562	0	0.037037	0.206897	0.08	0.333333	0.564103	1	0	0	0	0.0833333
solcap_snp_sl_25934	1	71.8401	0	0.00909091	0.118644	0.0769231	0.5	0.35	0.0625	0	0	0	0.0204082
solcap_snp_sl_25935	1	71.9055	0	0	0	0	0	0.0232558	0	0	0	0	0
solcap_snp_sl_38178	1	71.946	0	0.00909091	0	0.0384615	0	0.205128	0.933333	0	0	0	0.0204082
solcap_snp_sl_38210	1	72.0711	0	0	0	0	0	0.0238095	0.692308	0	0	0	0
solcap_snp_sl_38243	1	72.2685	0	0.00909091	0	0	0	0.128205	0.9375	0	0	0	0.0204082
solcap_snp_sl_38290	1	72.5285	0	0	0	0.0384615	0	0.05	0.933333	0	0	0	0
solcap_snp_sl_12348	1	72.5286	0.0928571	0.635514	0.241379	0.458333	0.1	0.435897	0.9375	0.111111	0.0192308	0.833333	0.382979
solcap_snp_sl_12350	1	72.6544	0.0928571	0.626168	0.196429	0.44	0.272727	0.25641	0.0714286	0.111111	0.0192308	0.833333	0.361702
solcap_snp_sl_12351	1	72.6545	0.0928571	0.635514	0.203704	0.48	0.2	0.435897	0.9375	0.111111	0.0192308	0.833333	0.382979
solcap_snp_sl_12352	1	72.6582	0.0928571	0.626168	0.192982	0.44	0.2	0.25641	0.0714286	0.111111	0.0192308	0.833333	0.361702
solcap_snp_sl_25951	1	72.6583	0	0	0	0	0	0.214286	0	0	0	0	0
solcap_snp_sl_25952	1	72.6586	0	0	0	0	0	0.214286	0	0	0	0	0
solcap_snp_sl_12354	1	72.6958	0.0935252	0.638095	0.2	0.458333	0.2	0.615385	1	0.111111	0.0196078	0.847458	0.369565
solcap_snp_sl_12355	1	72.6961	0.0928571	0.622642	0.185185	0.458333	0.2	0.564103	0.133333	0.111111	0.0192308	0.830508	0.361702
solcap_snp_sl_12356	1	72.6966	0.0928571	0.641509	0.196429	0.5	0.222222	0.804878	1	0.111111	0.0192308	0.833333	0.391304
solcap_snp_sl_12358	1	72.6971	0.0928571	0.644231	0.188679	0.478261	0.111111	0.725	1	0.111111	0.0192308	0.844828	0.391304
solcap_snp_sl_25953	1	72.7054	0	0.0636364	0.169811	0.347826	0.25	0.883721	1	0	0	0	0.142857
solcap_snp_sl_38324	1	72.7516	0	0.00909091	0	0	0	0.075	0.923077	0	0	0	0.0204082
solcap_snp_sl_521	1	72.7898	0.348148	0.752294	0.0333333	0.16	0	0	0	0.265823	0.44898	0.885246	0.583333
solcap_snp_sl_16331	1	72.7968	0.141844	0.0648148	0.368421	0.416667	0.5	0.512195	0.0625	0.170732	0.0769231	0.0327869	0.106383
solcap_snp_sl_12359	1	72.8004	0.135714	0.0740741	0.339286	0.434783	0.5	0.475	0.0714286	0.160494	0.0769231	0.0327869	0.12766
solcap_snp_sl_38346	1	72.9958	0.0935252	0.00909091	0.0163934	0	0	0.0243902	0.666667	0.135802	0.0384615	0	0.0204082
solcap_snp_sl_530	1	72.9963	0.129496	0.137615	0.245614	0.375	0.2	0.731707	1	0.160494	0.0769231	0.0491803	0.25
solcap_snp_sl_531	1	73.0232	0.519084	0.192308	0.666667	0.56	0.777778	0.439024	0.9375	0.708861	0.173913	0.155172	0.23913
solcap_snp_sl_38356	1	73.0535	0.151079	0.0181818	0.0163934	0	0	0.1	0.733333	0.197531	0.0384615	0	0.0408163
solcap_snp_sl_535	1	73.1473	0.469697	0.807692	0.148148	0.24	0.0909091	0.0232558	0	0.291139	0.787234	0.844828	0.76087
solcap_snp_sl_25960	1	73.1479	0	0	0	0	0	0.186047	0.0625	0	0	0	0
CL009288-0542	1	73.2128	0.151079	0.00909091	0.0163934	0.04	0	0.0238095	0.3125	0.197531	0.0384615	0	0.0204082
solcap_snp_sl_38389	1	73.2228	0.151079	0.0181818	0.0163934	0.0416667	0	0.153846	0.933333	0.197531	0.0384615	0	0.0408163
solcap_snp_sl_38390	1	73.2331	0.151079	0.0181818	0.0163934	0.0416667	0	0.175	0.928571	0.197531	0.0384615	0	0.0408163
solcap_snp_sl_38406	1	73.3142	0.0567376	0.00909091	0	0	0	0	0.857143	0.0609756	0	0	0.0204082
solcap_snp_sl_27286	1	73.4618	0.0638298	0.0181818	0	0.0416667	0.181818	0.25	0.9375	0.0731707	0	0	0.0408163
solcap_snp_sl_36715	1	73.5135	0.0762712	0.0183486	0	0.05	0.222222	0.529412	0.9375	0.0882353	0	0	0.0416667
solcap_snp_sl_27345	1	73.6495	0.0567376	0.0454545	0	0	0	0.0731707	0.75	0.0609756	0	0	0.102041
solcap_snp_sl_42191	1	73.8895	0.05	0.00909091	0	0.0833333	0.181818	0.236842	0.9375	0.0609756	0	0	0.0204082
solcap_snp_sl_27382	1	73.8899	0.05	0.00909091	0	0.04	0	0.131579	0.714286	0.0609756	0	0	0.0204082
solcap_snp_sl_27400	1	73.9678	0.05	0.00909091	0	0.0833333	0	0.0731707	0.785714	0.0609756	0	0	0.0204082
solcap_snp_sl_27452	1	74.2092	0.0642857	0.00909091	0	0.0384615	0	0.0512821	0.8	0.0853659	0	0	0.0204082
solcap_snp_sl_27482	1	74.2737	0	0	0	0	0	0.0232558	0	0	0	0	0
solcap_snp_sl_1813	1	74.2824	0.211679	0.0917431	0.122807	0.192308	0.333333	0.634146	1	0.271605	0.1	0.116667	0.0612245
solcap_snp_sl_1814	1	74.2896	0.157143	0.0733945	0	0.0740741	0.3	0.15	0.307692	0.195122	0.117647	0.116667	0.0204082
Le010791_85_solcap_snp_sl_42212	1	74.3098	0.0642857	0.0181818	0	0	0.0909091	0.315789	0.6	0.0853659	0	0	0.0408163
solcap_snp_sl_42213	1	74.3135	0.205882	0.0917431	0	0.0416667	0.181818	0.384615	1	0.2625	0.1	0.116667	0.0612245
solcap_snp_sl_17063	1	74.3147	0.0070922	0.0648148	0.271186	0.230769	0.166667	0.142857	0	0	0.0192308	0.0163934	0.12766
solcap_snp_sl_1815	1	74.315	0.151079	0.0642202	0	0	0	0	0	0.195122	0.1	0.1	0.0204082
solcap_snp_sl_1817	1	74.3184	0.163121	0.0818182	0	0.0384615	0.0833333	0.125	0.0625	0.195122	0.134615	0.131148	0.0204082
solcap_snp_sl_1819	1	74.3299	0.138686	0.0648148	0	0.0384615	0	0.125	0.0625	0.175	0.1	0.101695	0.0204082
solcap_snp_sl_17068	1	74.3591	0.0714286	0.0833333	0.290909	0.28	0.363636	0.45	0.866667	0.0853659	0.0192308	0.0163934	0.170213
solcap_snp_sl_17071	1	74.3605	0.0714286	0.0833333	0.275862	0.28	0.363636	0.475	0.9375	0.0853659	0.0192308	0.0163934	0.170213
solcap_snp_sl_17072	1	74.3608	0.0070922	0.0648148	0.280702	0.269231	0.25	0.219512	0	0	0.0192308	0.0163934	0.12766
solcap_snp_sl_27505	1	74.3615	0.0642857	0.00909091	0	0	0	0.0487805	0.714286	0.0853659	0	0	0.0204082
solcap_snp_sl_1824	1	74.465	0.138686	0.0733945	0	0	0	0	0	0.175	0.1	0.116667	0.0204082
solcap_snp_sl_17073	1	74.4816	#DIV/0!	0.285714	0	0	0.333333	0.769231	1	#DIV/0!	#DIV/0!	0	0.333333
solcap_snp_sl_17075	1	74.4833	0.0070922	0.0934579	0.37037	0.458333	0.6	0.6	1	0	0.0192308	0.0163934	0.195652
solcap_snp_sl_17076	1	74.5155	0.0070922	0.0740741	0.310345	0.269231	0.166667	0.0714286	0	0	0.0192308	0.0163934	0.148936
solcap_snp_sl_17077	1	74.5156	0.0070922	0.0849057	0.320755	0.391304	0.6	0.615385	1	0	0.0192308	0.0163934	0.177778
solcap_snp_sl_17080	1	74.5463	0.0070922	0.0648148	0.241379	0.269231	0	0.0714286	0	0	0.0192308	0.0163934	0.12766
solcap_snp_sl_1827	1	74.6023	0.143885	0.0727273	0	0	0	0	0	0.185185	0.0980392	0.114754	0.0204082
solcap_snp_sl_27556	1	74.6434	0.00714286	0.00909091	0	0.037037	0	0.0243902	0.428571	0	0.0192308	0	0.0204082
solcap_snp_sl_27588	1	74.8454	0.00714286	0.00917431	0	0.115385	0.181818	0.15	0.9375	0	0.0192308	0	0.0208333
solcap_snp_sl_27600	1	74.9984	0	0.00909091	0	0.037037	0.0909091	0.0731707	0.4	0	0	0	0.0204082
solcap_snp_sl_27605	1	75.0525	0	0.00917431	0	0.037037	0.0909091	0.15	0.9375	0	0	0	0.0208333
solcap_snp_sl_27629	1	75.1775	0	0.00917431	0	0.0384615	0.0833333	0.097561	0.866667	0	0	0	0.0208333
solcap_snp_sl_12826	1	75.199	0.0434783	0.448598	0.20339	0.2	0.0833333	0.05	0	0.0253165	0.0769231	0.551724	0.326531
solcap_snp_sl_27636	1	75.2083	0	0	0	0	0	0.0232558	0	0	0	0	0
SGN-U585636_snp200_solcap_snp_sl_26254	1	75.34	0	0.00917431	0	0.115385	0.181818	0.146341	0.9375	0	0	0	0.0208333
solcap_snp_sl_26248	1	75.362	0	0.00917431	0	0.0384615	0	0.0512821	0.785714	0	0	0	0.0208333
solcap_snp_sl_38490	1	75.4504	0	0.00917431	0	0.037037	0	0.075	0.533333	0	0	0	0.0208333
solcap_snp_sl_16393	1	75.5631	0.0141844	0.0555556	0.22807	0.2	0.375	0.609756	1	0.0121951	0.0192308	0.0163934	0.106383
solcap_snp_sl_16389	1	75.5774	0.0141844	0.0555556	0.214286	0.185185	0.375	0.536585	1	0.0121951	0.0192308	0.0163934	0.106383
SL10943_357	1	75.5904	0	0.00917431	0	0.0384615	0	0.075	0.666667	0	0	0	0.0208333
solcap_snp_sl_602	1	75.8217	0.175573	0.186916	0.641509	0.631579	0.428571	1	1	0.186667	0.0816327	0.152542	0.229167
solcap_snp_sl_26192	1	75.8474	0.00719424	0	0	0	0	0.0714286	0.266667	0.0125	0	0	0
solcap_snp_sl_26171	1	75.9716	0.00719424	0	0	0.037037	0	0.0731707	0.533333	0.0125	0	0	0
solcap_snp_sl_34452	1	76.1158	0.00719424	0	0	0	0	0.0731707	0.428571	0.0125	0	0	0
solcap_snp_sl_34461	1	76.1723	0.00719424	0	0	0	0.0909091	0.125	0.933333	0.0125	0	0	0
solcap_snp_sl_34484	1	76.3535	0.00719424	0	0	0	0	0.025641	0.5625	0.0125	0	0	0
solcap_snp_sl_34512	1	76.5286	0.00719424	0	0	0	0	0.075	0.666667	0.0125	0	0	0
solcap_snp_sl_34513	1	76.5287	0.00719424	0	0	0	0	0.1	0.933333	0.0125	0	0	0
solcap_snp_sl_34515	1	76.5289	0.00719424	0	0	0	0	0.075	0.666667	0.0125	0	0	0
solcap_snp_sl_34522	1	76.5639	0.00719424	0	0	0	0	0.0731707	0.571429	0.0125	0	0	0
CL015901-0259	1	76.6001	0	0	0	0	0	0	0	0	0	0	0
solcap_snp_sl_63558	1	76.6004	0.0142857	0	0	0	0	0.075	0.933333	0.0246914	0	0	0
solcap_snp_sl_9751	1	76.669	0.671875	0.8	0.0677966	0.125	0.111111	0.097561	0	0.730769	0.613636	0.933333	0.622222
solcap_snp_sl_34545	1	76.7372	0.0070922	0	0	0	0	0.2	0.9375	0.0121951	0	0	0
solcap_snp_sl_21280	1	76.7837	0.141791	0.87037	0.40678	0.166667	0.1	0.0487805	0	0.144737	0.115385	0.95082	0.765957
CL016392-0070	1	76.7839	0	0	0	0	0	0	0	0	0	0	0
solcap_snp_sl_9752	1	76.8882	0.496124	0.0363636	0.0526316	0.037037	0.1	0.047619	0	0.532468	0.511111	0.0163934	0.0612245
solcap_snp_sl_9755	1	76.8954	0.492308	0.0454545	0.333333	0.307692	0.5	0.473684	0.0625	0.532468	0.5	0.0163934	0.0816327
solcap_snp_sl_9756	1	76.8973	0.496183	0.0454545	0.357143	0.296296	0.545455	0.473684	0.0625	0.532468	0.510638	0.0163934	0.0816327
solcap_snp_sl_9758	1	76.9019	0.5	0.05	0.434783	0.333333	0.636364	0.5	0.0625	0.532468	0.522727	0.0172414	0.0952381
solcap_snp_sl_34568	1	76.9057	0.503876	0.0458716	0.357143	0.333333	0.555556	0.804878	1	0.545455	0.511111	0.0163934	0.0833333
solcap_snp_sl_9759	1	76.9109	0.507692	0.0458716	0.327273	0.296296	0.5	0.6	0.866667	0.545455	0.521739	0.0163934	0.0833333
Cd2_2755_solcap_snp_sl_34581	1	76.9835	0.0070922	0	0	0.0769231	0.0833333	0.289474	0.9375	0.0121951	0	0	0
Cd2_2182_solcap_snp_sl_34582	1	76.9856	0.0070922	0	0	0	0	0.0487805	0.0625	0.0121951	0	0	0
solcap_snp_sl_34596	1	77.0744	0.0070922	0.0277778	0	0	0	0.0952381	0.642857	0.0121951	0	0	0.0638298
solcap_snp_sl_34603	1	77.1107	0.150376	0.814815	0.345455	0.478261	0.333333	0.578947	0.9375	0.213333	0.0384615	0.885246	0.723404
solcap_snp_sl_63583	1	77.1108	0.150376	0.830189	0.362069	0.5	0.4	0.6	0.9375	0.213333	0.0384615	0.9	0.73913
solcap_snp_sl_15339	1	77.1124	0.142857	0.783019	0.362069	0.375	0.222222	0.230769	0	0.2	0.0384615	0.885246	0.644444
solcap_snp_sl_34622	1	77.1865	0.0070922	0.0277778	0	0	0	0.230769	0.875	0.0121951	0	0	0.0638298
solcap_snp_sl_27784	1	77.3516	0.0070922	0.0277778	0	0	0	0.230769	0.9375	0.0121951	0	0	0.0638298
solcap_snp_sl_27832	1	77.6628	0.0070922	0.0275229	0	0	0	0.0731707	0.642857	0.0121951	0	0	0.0625
solcap_snp_sl_27859	1	77.7486	0.0070922	0.0275229	0	0	0.0909091	0.25641	0.933333	0.0121951	0	0	0.0625
solcap_snp_sl_27863	1	77.7586	0.0070922	0	0	0	0	0.0512821	0.4	0.0121951	0	0	0
solcap_snp_sl_2202	1	77.916	0.238806	0.707547	0.118644	0.48	0.333333	0.717949	1	0.350649	0.0588235	0.8	0.586957
solcap_snp_sl_43632	1	77.9355	0.221374	0.679612	0.0535714	0.291667	0	0.315789	0	0.324324	0.0588235	0.75	0.581395
solcap_snp_sl_27904	1	77.9587	0.0070922	0.0366972	0	0	0	0.230769	0.866667	0.0121951	0	0.0163934	0.0625
solcap_snp_sl_27906	1	77.9589	0.0070922	0.0275229	0	0	0	0.05	0.466667	0.0121951	0	0	0.0625
solcap_snp_sl_27908	1	77.9596	0.0070922	0.0366972	0	0	0	0.075	0.8	0.0121951	0	0.0163934	0.0625
SL10945_281	1	78.091	0.0070922	0.0275229	0	0	0.0909091	0.210526	0.866667	0.0121951	0	0	0.0625
solcap_snp_sl_17289	1	78.1041	0	0.00909091	0.0163934	0	0	0	0	0	0	0	0.0204082
solcap_snp_sl_27964	1	78.1773	0.0070922	0.0275229	0	0	0	0.157895	0.6	0.0121951	0	0	0.0625
CL016133-0426	1	78.3011	0	0	0	0	0	0	0	0	0	0	0
solcap_snp_sl_2218	1	78.31	0.1	0.442308	0.311475	0.52	0.444444	0.692308	1	0.111111	0.0384615	0.421053	0.468085
solcap_snp_sl_2219	1	78.3252	0.0928571	0.401961	0.288136	0.416667	0.222222	0.121951	0	0.0987654	0.0384615	0.410714	0.391304
solcap_snp_sl_43655	1	78.3558	0.0070922	0.0275229	0	0.037037	0	0.0731707	0.8	0.0121951	0	0	0.0625
solcap_snp_sl_2226	1	78.3983	0.0928571	0.245283	0.311475	0.416667	0.3	0.170732	0.0625	0.0987654	0.0384615	0.206897	0.291667
solcap_snp_sl_2234	1	78.5251	0.142857	0.330189	0.327869	0.52	0.444444	0.513514	1	0.123457	0.134615	0.254237	0.425532
solcap_snp_sl_28023	1	78.5849	0.0070922	0.0275229	0	0.04	0.0909091	0.210526	0.9375	0.0121951	0	0	0.0625
solcap_snp_sl_28057	1	78.6936	0.0070922	0	0	0.037037	0	0.0714286	0.6	0.0121951	0	0	0
CL016805-0518	1	78.8261	0	0	0	0	0	0	0	0	0	0	0
CL016805-0261	1	78.8264	0.0642857	0	0	0	0.0909091	0.157895	0.285714	0.0987654	0.0192308	0	0
solcap_snp_sl_28099	1	78.8431	0.0652174	0	0	0.0384615	0	0.05	0.727273	0.1	0.0192308	0	0
solcap_snp_sl_28168	1	79.0805	0	0	0	0	0	0.05	0.5625	0	0	0	0
solcap_snp_sl_28173	1	79.095	0	0.0275229	0	0	0	0.179487	0.733333	0	0	0	0.0625
SGN-U585738_snp404_solcap_snp_sl_43712	1	79.1522	0	0.00934579	0	0	0.0909091	0.189189	0.9375	0	0	0	0.0217391
solcap_snp_sl_28225	1	79.3525	0	0.00934579	0	0.08	0.2	0.2	0.9375	0	0	0	0.0217391
solcap_snp_sl_28247	1	79.4639	0	0	0	0	0.0909091	0.157895	0.75	0	0	0	0
CL016510-0445	1	79.4822	0	0.00934579	0	0	0.0909091	0.184211	0.9375	0	0	0	0.0217391
solcap_snp_sl_43786	1	79.7662	0	0.0186916	0	0.04	0.0909091	0.157895	0.666667	0	0	0.0163934	0.0217391
solcap_snp_sl_43796	1	79.8479	0	0.00909091	0	0.16	0	0.0789474	0.933333	0	0	0.0163934	0
solcap_snp_sl_43843	1	80.0004	0	0.00909091	0	0.111111	0	0.025	0.6	0	0	0.0163934	0
SGN-U314898_snp260	1	80.0012	0	0.00909091	0	0.111111	0	0.025641	0.8125	0	0	0.0163934	0
CL000132-1036	1	80.0693	0	0	0	0	0	0	0	0	0	0	0
solcap_snp_sl_43857	1	80.0742	0	0	0	0	0	0.0487805	0.666667	0	0	0	0
solcap_snp_sl_43894	1	80.2767	0	0.00909091	0	0	0	0	0.533333	0	0	0.0163934	0
solcap_snp_sl_43895	1	80.2768	0	0.00909091	0	0	0	0	0.533333	0	0	0.0163934	0
solcap_snp_sl_43900	1	80.2806	0	0.00909091	0	0	0	0	0.375	0	0	0.0163934	0
ZDS_Promoter_SNP1	1	80.2857	0	0	0	0	0	0.0238095	0.1875	0	0	0	0
solcap_snp_sl_43902	1	80.2898	0	0.00909091	0	0	0	0.0243902	0.6	0	0	0.0163934	0
solcap_snp_sl_43935	1	80.3608	0	0.00909091	0	0.111111	0	0	0.0625	0	0	0.0163934	0
solcap_snp_sl_17351	1	80.4803	0.0212766	0.0181818	0.155172	0.346154	0.4	0.567568	0.933333	0	0.0384615	0.0163934	0.0204082
solcap_snp_sl_43979	1	80.548	0	0.00909091	0	0.111111	0	0	0.125	0	0	0.0163934	0
solcap_snp_sl_44009	1	80.7335	0	0.00917431	0	0.0416667	0	0.0789474	0.666667	0	0	0.0163934	0
solcap_snp_sl_44036	1	80.8825	0	0.00909091	0	0.04	0	0	0.333333	0	0	0.0163934	0
solcap_snp_sl_44048	1	80.9615	0	0	0	0.08	0	0.0769231	0.8	0	0	0	0
solcap_snp_sl_23344	1	80.963	0.201493	0	0	0	0	0	0	0.113924	0.375	0	0
SL10259_338	1	81.0008	0	0	0	0	0	0	0.125	0	0	0	0
solcap_snp_sl_44108	1	81.1636	0	0.00909091	0	0	0	0	0.266667	0	0	0.0163934	0
solcap_snp_sl_44147	1	81.2436	0	0.00909091	0	0	0	0.047619	0.666667	0	0	0.0163934	0
solcap_snp_sl_44168	1	81.2974	0	0	0	0	0	0	0.133333	0	0	0	0
solcap_snp_sl_28287	1	81.333	0.0070922	0.00909091	0.0338983	0.0740741	0	0.236842	0.533333	0	0	0.0163934	0
solcap_snp_sl_44190	1	81.427	0	0.00909091	0	0	0	0.128205	0.8	0	0	0.0163934	0
solcap_snp_sl_44213	1	81.5661	0.0141844	0.00917431	0	0.037037	0	0.0487805	0.642857	0.0243902	0	0.0163934	0
CL017666-0495	1	81.6635	0.0141844	0.00917431	0	0.0384615	0	0.105263	0.866667	0.0243902	0	0.0163934	0
solcap_snp_sl_44266	1	81.7019	0.0141844	0.00917431	0	0.04	0	0.105263	0.9375	0.0243902	0	0.0163934	0
solcap_snp_sl_28295	1	81.7121	0	0	0	0	0	0.0232558	0	0	0	0	0
solcap_snp_sl_44305	1	81.8082	0.0141844	0.0181818	0	0.04	0	0.131579	0.9375	0.0243902	0	0.0163934	0.0204082
solcap_snp_sl_2437	1	81.8707	0.303704	0.0550459	0.413793	0.444444	0.454545	0.394737	0	0.2125	0.428571	0.0163934	0.104167
solcap_snp_sl_2438	1	81.8724	0.318519	0.0733945	0.413793	0.5	0.454545	0.564103	0.9375	0.2375	0.428571	0.0327869	0.125
solcap_snp_sl_2440	1	81.8738	0.318519	0.0733945	0.45283	0.52	0.454545	0.564103	0.8	0.2375	0.428571	0.0327869	0.125
solcap_snp_sl_2451	1	81.9866	0.0143885	0.00909091	0.192982	0.25	0.333333	0.368421	0.133333	0	0.0392157	0.0163934	0
solcap_snp_sl_2452	1	81.9885	0.0357143	0.0272727	0.196429	0.375	0.333333	0.538462	1	0.0365854	0.0392157	0.0327869	0.0204082
solcap_snp_sl_2455	1	81.9923	0.0357143	0.0272727	0.189655	0.375	0.333333	0.564103	1	0.0365854	0.0392157	0.0327869	0.0204082
solcap_snp_sl_2457	1	82.001	0.0357143	0.0272727	0.186441	0.375	0.3	0.564103	1	0.0365854	0.0392157	0.0327869	0.0204082
solcap_snp_sl_44370	1	82.0219	0	0	0	0.037037	0	0	0.0666667	0	0	0	0
CL015672-0280	1	82.0759	0.0141844	0	0	0.0384615	0	0.047619	0.4	0.0243902	0	0	0
CL017306-0367_solcap_snp_sl_44383	1	82.1316	0.0141844	0.00917431	0	0.0769231	0	0.05	0.846154	0.0243902	0	0.0163934	0
solcap_snp_sl_44394	1	82.1559	0	0.00909091	0	0.037037	0	0	0.2	0	0	0.0163934	0
CL015829-0286_solcap_snp_sl_44451	1	82.3294	0.0141844	0.00917431	0	0.0769231	0	0.05	0.866667	0.0243902	0	0.0163934	0
solcap_snp_sl_2501	1	82.3396	0.00724638	0.0181818	0.12069	0.148148	0.0909091	0.0697674	0	0	0.02	0.0163934	0.0204082
solcap_snp_sl_44461	1	82.4045	0.0141844	0.0181818	0	0.166667	0.222222	0.589744	1	0.0243902	0	0.0163934	0.0204082
solcap_snp_sl_2504	1	82.4229	0.0357143	0.0272727	0.114754	0.2	0.181818	0.25	0.9375	0.0365854	0.0392157	0.0327869	0.0204082
solcap_snp_sl_2506	1	82.4259	0.0214286	0.00909091	0.114754	0.153846	0	0.0465116	0	0.0121951	0.0392157	0.0163934	0
solcap_snp_sl_2508	1	82.429	0.0357143	0.0272727	0.114754	0.2	0.181818	0.25	0.9375	0.0365854	0.0392157	0.0327869	0.0204082
solcap_snp_sl_2509	1	82.4327	0.0217391	0.0272727	0.0526316	0.166667	0.181818	0.282051	0.9375	0.0246914	0.02	0.0327869	0.0204082
CL016552-0078	1	82.433	0.0141844	0.00917431	0	0.037037	0	0	0.4	0.0243902	0	0.0163934	0
solcap_snp_sl_44465	1	82.4398	0.0217391	0.0272727	0.0535714	0.16	0.181818	0.275	0.9375	0.0246914	0.02	0.0327869	0.0204082
solcap_snp_sl_2510	1	82.4398	0.0357143	0.0272727	0.116667	0.2	0.181818	0.275	0.9375	0.0365854	0.0392157	0.0327869	0.0204082
solcap_snp_sl_2515	1	82.447	0.0214286	0.00917431	0.116667	0.153846	0.181818	0.2	0.266667	0.0121951	0.0392157	0.0163934	0
solcap_snp_sl_44470	1	82.5037	0.0141844	0.00917431	0	0.0384615	0	0.0487805	0.769231	0.0243902	0	0.0163934	0
solcap_snp_sl_2518	1	82.5211	0.0214286	0.00909091	0.114754	0.185185	0	0.0232558	0	0.0121951	0.0392157	0.0163934	0
solcap_snp_sl_2525	1	82.5373	0.0214286	0.00909091	0.114754	0.185185	0	0.0232558	0	0.0121951	0.0392157	0.0163934	0
SGN-U571854_snp167_solcap_snp_sl_44482	1	82.5928	0	0.0181818	0	0.0769231	0.181818	0.170732	0.8125	0	0	0.0163934	0.0204082
solcap_snp_sl_44540	1	82.8054	0	0	0	0	0	0	0.0625	0	0	0	0
solcap_snp_sl_40061	1	83.223	0.0070922	0	0	0	0	0.0540541	0.75	0.0121951	0	0	0
solcap_snp_sl_40076	1	83.278	0.0070922	0	0	0	0	0.0810811	0.9375	0.0121951	0	0	0
solcap_snp_sl_40154	1	83.5174	0.0070922	0	0	0.08	0	0.111111	0.9375	0.0121951	0	0	0
solcap_snp_sl_40177	1	83.6513	0.0070922	0	0	0	0	0.0810811	0.9375	0.0121951	0	0	0
solcap_snp_sl_40199	1	83.8045	0.0070922	0	0	0	0	0.0243902	0.571429	0.0121951	0	0	0
solcap_snp_sl_40219	1	83.914	0.0070922	0	0	0.115385	0	0.0810811	0.933333	0.0121951	0	0	0
CL015751-0365	1	84.0312	0.0070922	0	0	0.115385	0	0.097561	0.733333	0.0121951	0	0	0
solcap_snp_sl_40284	1	84.1906	0.0070922	0	0	0.111111	0	0	0.357143	0.0121951	0	0	0
CL016719-0209_solcap_snp_sl_40301	1	84.2367	0.0070922	0	0.0508475	0.461538	0.444444	0.634146	1	0.0121951	0	0	0
solcap_snp_sl_40303	1	84.239	0.0070922	0	0	0.08	0.125	0.125	0.866667	0.0121951	0	0	0
solcap_snp_sl_40309	1	84.2537	0.0070922	0	0	0.0769231	0	0.0714286	0.416667	0.0121951	0	0	0
SGN-U597311_snp612	1	84.378	0	0	0	0.037037	0.222222	0.195122	0.214286	0	0	0	0
CL016500-0535	1	84.3909	0	0	0	0	0	0	0	0	0	0	0
CL016500-0058	1	84.3914	0	0	0	0.111111	0	0	0	0	0	0	0
solcap_snp_sl_40364	1	84.4054	0.0070922	0	0	0.111111	0	0.0243902	0.533333	0.0121951	0	0	0
SGN-U576068_snp460_solcap_snp_sl_40366	1	84.4058	0.00714286	0.037037	0.385965	0.615385	0.555556	0.928571	1	0.0121951	0	0	0.0851064
solcap_snp_sl_40410	1	84.6969	0.0070922	0	0	0.111111	0	0.0487805	0.5	0.0121951	0	0	0
solcap_snp_sl_40466	1	84.8848	0.0070922	0.00909091	0	0.111111	0	0.0243902	0.666667	0.0121951	0	0.0163934	0
solcap_snp_sl_40488	1	85.061	0.0070922	0.00917431	0	0.125	0	0.282051	0.9375	0.0121951	0	0.0163934	0
solcap_snp_sl_40498	1	85.0976	0.0070922	0.00917431	0	0.12	0	0.153846	0.9375	0.0121951	0	0.0163934	0
solcap_snp_sl_40527	1	85.2339	0.0070922	0.00909091	0	0.115385	0	0.05	0.666667	0.0121951	0	0.0163934	0
solcap_snp_sl_26879	1	85.2362	0.0070922	0.0185185	0.235294	0.16	0.125	0.0465116	0	0	0.0192308	0	0.0425532
solcap_snp_sl_40571	1	85.4629	0.0070922	0.00909091	0	0.153846	0	0.153846	0.692308	0.0121951	0	0.0163934	0
CL015143-0314	1	85.5174	0	0.00909091	0	0.115385	0	0.0232558	0.133333	0	0	0.0163934	0
solcap_snp_sl_40586	1	85.589	0.00714286	0.0471698	0.125	0.192308	0.125	0.513514	0.933333	0.0121951	0	0.0491803	0.0444444
CL016564-0236_solcap_snp_sl_40595	1	85.6599	0.0070922	0.00909091	0	0.111111	0	0.05	0.733333	0.0121951	0	0.0163934	0
CL016564-0245	1	85.6599	0	0	0	0	0	0	0	0	0	0	0
SGN-U565150_snp835	1	85.732	0	0.00943396	0	0	0.1	0.128205	0	0	0	0	0.0222222
solcap_snp_sl_36725	1	85.7446	0.0142857	0.0673077	0.528302	0.681818	0.7	1	1	0.0121951	0.0192308	0.05	0.0909091
CL017342-0410	1	85.7992	0.0070922	0.00909091	0	0.111111	0	0.0487805	0.785714	0.0121951	0	0.0163934	0
CL017342-0589	1	85.7994	0	0	0	0	0	0	0	0	0	0	0
solcap_snp_sl_42259	1	85.9447	0.0070922	0	0	0	0	0.0243902	0.545455	0.0121951	0	0	0
solcap_snp_sl_42255	1	85.9503	0.0070922	0	0	0	0	0	0.416667	0.0121951	0	0	0
solcap_snp_sl_54525	1	86.0203	0	0.00917431	0	0.12	0	0.128205	0.928571	0	0	0.0163934	0
SGN-U574380_snp1064_solcap_snp_sl_54535	1	86.0885	0.0070922	0	0	0	0	0.05	0.538462	0.0121951	0	0	0
3284_1_60_solcap_snp_sl_54547	1	86.1222	0.0955882	0.0952381	0.35	0.615385	0.4	0.860465	1	0.075	0.14	0.0163934	0.204545
SGN-U313641_snp560	1	86.1231	0	0	0	0	0.2	0.0714286	0	0	0	0	0
CL016298-0380	1	86.1591	0	0	0	0	0	0.1	0.0769231	0	0	0	0
solcap_snp_sl_54581	1	86.2251	0.0070922	0.00909091	0	0.111111	0	0	0.25	0.0121951	0	0.0163934	0
solcap_snp_sl_54589	1	86.3111	0.0070922	0.00917431	0	0.115385	0	0.1	0.5	0.0121951	0	0.0163934	0
C2_At1g50020_1125c	1	86.3184	0	0.00909091	0	0.111111	0	0	0.133333	0	0	0.0163934	0
solcap_snp_sl_31775	1	86.3227	0.117647	0.00934579	0.206897	0.0769231	0.181818	0.0714286	0	0.101266	0.16	0	0.0217391
solcap_snp_sl_31777	1	86.3352	0.111111	0.00934579	0.37037	0.25	0.5	0.307692	0	0.101266	0.142857	0	0.0217391
solcap_snp_sl_54622	1	86.4664	0.0070922	0.00917431	0	0.12	0.0909091	0.179487	0.866667	0.0121951	0	0.0163934	0
CL017439-0390	1	86.4833	0	0	0	0	0	0	0	0	0	0	0
solcap_snp_sl_31778	1	86.4834	0.132353	0.0648148	0.416667	0.346154	0.4	0.45	0	0.125	0.163265	0.05	0.0833333
CL017439-0179	1	86.4835	0	0	0	0.037037	0.0909091	0.170732	0.1875	0	0	0	0
solcap_snp_sl_6718	1	86.4843	0.155556	0.0917431	0.431034	0.608696	0.5	0.744186	0.9375	0.1375	0.1875	0.0666667	0.122449
CL015970-0397_solcap_snp_sl_54631	1	86.4867	0.0070922	0.00917431	0	0.153846	0.0909091	0.243902	0.928571	0.0121951	0	0.0163934	0
CL006477-0571	1	86.5365	0	0	0	0	0	0	0	0	0	0	0
solcap_snp_sl_6721	1	86.5728	0.160584	0.0550459	0.271186	0.269231	0.272727	0.261905	0	0.1375	0.2	0.05	0.0612245
solcap_snp_sl_54669	1	86.652	0.0070922	0.00909091	0	0.24	0	0.125	0.75	0.0121951	0	0.0163934	0
solcap_snp_sl_14323	1	86.6757	0.765152	0.46729	0.288136	0.0740741	0.111111	0	0	0.797468	0.729167	0.474576	0.458333
solcap_snp_sl_19481	1	86.711	0.0444444	0.114286	0.416667	0.68	0.666667	0.902439	1	0.025	0.0612245	0.0508475	0.195652
solcap_snp_sl_54685	1	86.7569	0.0070922	0.00909091	0	0.125	0	0.0243902	0.933333	0.0121951	0	0.0163934	0
SGN-U580895_snp1396_solcap_snp_sl_54697	1	86.8131	0.0070922	0.0380952	0.0166667	0.36	0.222222	0.756098	1	0.0121951	0	0.0338983	0.0434783
solcap_snp_sl_54704	1	86.8288	0.0070922	0.00909091	0	0.192308	0	0.0243902	0.75	0.0121951	0	0.0163934	0
CL009130-0498	1	86.8695	0.138686	0.0183486	0	0.148148	0	0.230769	0.8	0.1	0.2	0.0163934	0.0208333
CL009293-0681	1	86.8831	0.138686	0.0183486	0	0.192308	0	0.225	0.8125	0.1	0.2	0.0163934	0.0208333
solcap_snp_sl_54730	1	86.9647	0	0.00909091	0	0.08	0	0.0238095	0.5	0	0	0.0163934	0
solcap_snp_sl_54731	1	86.9654	0	0.00909091	0	0.111111	0	0.0238095	0.571429	0	0	0.0163934	0
solcap_snp_sl_54732	1	86.9793	0	0.00909091	0	0.111111	0	0.0238095	0.357143	0	0	0.0163934	0
CL016668-0365	1	87.0425	0	0.00909091	0	0.115385	0	0.0243902	0.533333	0	0	0.0163934	0
solcap_snp_sl_54758	1	87.0576	0	0.00917431	0	0.2	0	0.205128	0.928571	0	0	0.0163934	0
solcap_snp_sl_54783	1	87.1931	0	0.00909091	0	0.115385	0	0.0232558	0	0	0	0.0163934	0
solcap_snp_sl_54809	1	87.3135	0	0	0	0	0	0	0.0625	0	0	0	0
solcap_snp_sl_54854	1	87.5069	0.00714286	0.00917431	0	0.115385	0	0.0789474	0.785714	0.0123457	0	0.0163934	0
solcap_snp_sl_54883	1	87.5318	0.00714286	0.00917431	0	0.230769	0	0.105263	0.9375	0.0123457	0	0.0163934	0
solcap_snp_sl_48338	1	87.6418	0	0	0	0.0384615	0	0.0487805	0.785714	0	0	0	0
solcap_snp_sl_48336	1	87.643	0	0	0	0.037037	0	0.075	0.428571	0	0	0	0
C2_At2g15890_430_b	1	87.7982	0.00714286	0.0181818	0.0163934	0.192308	0	0.05	0.785714	0.0123457	0	0.0327869	0
solcap_snp_sl_13404	1	87.9779	0.164179	0.700935	0.413793	0.666667	0.444444	0.767442	1	0.220779	0.02	0.816667	0.553191
solcap_snp_sl_29388	1	87.9782	0.165414	0.695238	0.410714	0.692308	0.5	0.767442	1	0.220779	0.0204082	0.813559	0.543478
solcap_snp_sl_48274	1	87.9783	0.162963	0.698113	0.403509	0.68	0.444444	0.767442	1	0.217949	0.02	0.816667	0.543478
solcap_snp_sl_13402	1	87.9795	0.162963	0.682243	0.396552	0.461538	0.5	0.7	0.266667	0.217949	0.02	0.783333	0.553191
solcap_snp_sl_13401	1	87.9876	0.164179	0.675926	0.448276	0.423077	0.6	0.564103	0.125	0.220779	0.02	0.783333	0.541667
solcap_snp_sl_13399	1	88.0118	0.835821	0.301887	0.517241	0.333333	0.333333	0.232558	0	0.779221	0.98	0.186441	0.446809
solcap_snp_sl_13398	1	88.0386	0.835821	0.301887	0.5	0.333333	0.4	0.162791	0	0.779221	0.98	0.186441	0.446809
solcap_snp_sl_48255	1	88.0718	0	0	0	0.0384615	0	0.0487805	0.4	0	0	0	0
solcap_snp_sl_48243	1	88.1091	0	0.00917431	0.0163934	0.192308	0	0.225	0.666667	0	0	0.0163934	0
solcap_snp_sl_48237	1	88.1318	0	0.0181818	0.0163934	0.192308	0	0.025	0.8	0	0	0.0327869	0
solcap_snp_sl_4283	1	88.2533	0.246154	0.820755	0.62	0.434783	0.625	0.378378	0	0.28	0.142857	0.9	0.717391
solcap_snp_sl_48209	1	88.2696	0	0.0183486	0.0163934	0.192308	0	0.0789474	0.8125	0	0	0.0327869	0
solcap_snp_sl_48181	1	88.4018	0	0.00909091	0.0163934	0.192308	0	0.025	0.642857	0	0	0.0163934	0
solcap_snp_sl_48179	1	88.4179	0	0.00917431	0	0.2	0	0.205128	0.9375	0	0	0.0163934	0
SGN-U581692_snp378	1	88.4302	0	0.00917431	0	0.192308	0	0.205128	0.8	0	0	0.0163934	0
solcap_snp_sl_48151	1	88.5612	0	0.00909091	0	0.153846	0	0.05	0.875	0	0	0.0163934	0
solcap_snp_sl_48133	1	88.6505	0	0.00909091	0.0163934	0.185185	0	0.0238095	0.3125	0	0	0.0163934	0
solcap_snp_sl_48121	1	88.6657	0	0.0747664	0.0166667	0.269231	0.272727	0.317073	0.8	0	0	0.0655738	0.0869565
solcap_snp_sl_48117	1	88.7795	0	0.00917431	0	0.16	0	0.166667	0.6	0	0	0.0163934	0
solcap_snp_sl_48115	1	88.7868	0	0.00909091	0.0163934	0.192308	0	0.05	0.615385	0	0	0.0163934	0
CL017046-0184	1	88.8653	0	0.00909091	0	0	0	0	0	0	0	0	0.0204082
CL009031-0566	1	88.8688	0	0	0	0	0	0	0	0	0	0	0
solcap_snp_sl_48097	1	88.8722	0	0.0740741	0.0163934	0.230769	0.416667	0.230769	0.875	0	0	0.0655738	0.0851064
solcap_snp_sl_48077	1	88.934	0	0.00917431	0	0.2	0	0.157895	0.9375	0	0	0	0.0208333
solcap_snp_sl_48043	1	89.1884	0	0.0183486	0.0327869	0.230769	0.333333	0.25	0.9375	0	0	0	0.0416667
solcap_snp_sl_50683	1	89.2	0	0.0183486	0	0.2	0.2	0.205128	0.866667	0	0	0	0.0416667
SGN-U573826_snp1014_solcap_snp_sl_53877	1	89.2226	0	0.0183486	0.0163934	0.222222	0.333333	0.205128	0.8	0	0	0	0.0416667
solcap_snp_sl_53871	1	89.2245	0	0.00917431	0.0166667	0.230769	0.333333	0.205128	0.875	0	0	0	0.0208333
solcap_snp_sl_53870	1	89.2246	0	0.0183486	0	0.208333	0.2	0.230769	0.875	0	0	0	0.0416667
CL015665-0595	1	89.2398	0	0.00909091	0	0	0	0	0	0	0	0	0.0204082
solcap_snp_sl_53864	1	89.2517	0	0.0183486	0.0333333	0.230769	0.333333	0.205128	0.8	0	0	0	0.0416667
solcap_snp_sl_53862	1	89.2541	0	0.0183486	0	0.2	0.2	0.205128	0.875	0	0	0	0.0416667
SGN-U313729_snp305	1	89.2571	0	0.0272727	0.0333333	0.230769	0.333333	0.205128	0.875	0	0	0	0.0612245
CL016082-0560	1	89.2726	0	0.00925926	0.0333333	0.230769	0.333333	0.205128	0.9375	0	0	0	0.0212766
solcap_snp_sl_53846	1	89.2999	0	0.00917431	0	0.0384615	0	0.105263	0.733333	0	0	0	0.0208333
solcap_snp_sl_53812	1	89.407	0	0	0	0.16	0	0.128205	0.8	0	0	0	0
SGN-U581283_snp1102_solcap_snp_sl_53749	1	89.6285	0	0.00917431	0.0169492	0.307692	0.454545	0.210526	0.9375	0	0	0	0.0208333
solcap_snp_sl_53743	1	89.6384	0	0.00917431	0.0169492	0.307692	0.454545	0.210526	0.9375	0	0	0	0.0208333
CL016160-0228	1	89.6542	0	0	0	0	0	0	0	0	0	0	0
SGN-U581138_snp1171_solcap_snp_sl_53721	1	89.7557	0	0.00909091	0.0327869	0.25	0.454545	0.135135	0.909091	0	0	0	0.0204082
CL015806-0417_solcap_snp_sl_53692	1	89.8511	0	0	0.0163934	0.230769	0.1	0.0731707	0.6875	0	0	0	0
solcap_snp_sl_53671	1	89.9303	0	0	0.0163934	0.269231	0.1	0.047619	0.533333	0	0	0	0
solcap_snp_sl_53654	1	89.9813	0	0.00909091	0.0163934	0.222222	0.4	0.125	0.875	0	0	0	0.0204082
solcap_snp_sl_53630	1	90.0907	0	0.00909091	0.0163934	0.230769	0.5	0.15	0.9375	0	0	0	0.0204082
solcap_snp_sl_53612	1	90.1728	0	0	0	0	0	0.0238095	0.333333	0	0	0	0
solcap_snp_sl_56930	2	0.331954	0	0.00909091	0	0	0	0.0243902	0.1875	0	0	0.0163934	0
solcap_snp_sl_7396	2	0.681961	0	0.00909091	0	0	0	0.1	0.0625	0	0	0.0163934	0
solcap_snp_sl_7398	2	1.51176	0	0.0272727	0	0.0434783	0.3	0.3	0.9375	0	0	0.0327869	0.0204082
SL10205_435	2	1.51465	0	0.00909091	0	0	0	0.1	0.1875	0	0	0.0163934	0
CL009078-0683	2	1.57953	0	0	0	0	0	0	0	0	0	0	0
SL10351_878	2	1.57983	0	0.0272727	0	0	0	0.135135	0.875	0	0	0.0327869	0.0204082
solcap_snp_sl_19822	2	1.58015	0	0.0458716	0.0819672	0.0769231	0.0833333	0.047619	0	0	0	0.0163934	0.0833333
solcap_snp_sl_56940	2	2.05411	0	0.0272727	0	0	0.222222	0.3	0.933333	0	0	0.0327869	0.0204082
solcap_snp_sl_7408	2	2.06998	0	0.0272727	0	0	0	0.135135	0.875	0	0	0.0327869	0.0204082
solcap_snp_sl_56941	2	2.07823	0	0	0	0.0434783	0	0.133333	0.9	0	0	0	0
solcap_snp_sl_7409	2	2.0881	0	0.00909091	0	0	0	0.0731707	0	0	0	0.0163934	0
solcap_snp_sl_56942	2	2.08811	0	0.0272727	0	0	0	0.135135	0.875	0	0	0.0327869	0.0204082
solcap_snp_sl_56943	2	2.08818	0	0.0272727	0.0344828	0.166667	0.333333	0.615385	1	0	0	0.0327869	0.0204082
solcap_snp_sl_7410	2	2.30982	0.410448	0.326923	0.464286	0.458333	0.2	0.292683	0	0.21519	0.75	0.344828	0.304348
solcap_snp_sl_44550	2	6.13844	0	0.0272727	0	0.04	0.3	0.194444	0.9375	0	0	0.0327869	0.0204082
solcap_snp_sl_28320	2	6.13964	0	0.0272727	0	0	0.3	0.275	0.9375	0	0	0.0327869	0.0204082
solcap_snp_sl_2559	2	6.28328	0	0.0272727	0.0350877	0.166667	0.333333	0.615385	1	0	0	0.0327869	0.0204082
solcap_snp_sl_17448	2	6.35529	0	0.0458716	0.0677966	0.04	0.0909091	0.0731707	0	0	0	0.0163934	0.0833333
solcap_snp_sl_2561	2	6.51928	0	0.0272727	0	0.0434783	0.222222	0.3	0.9375	0	0	0.0327869	0.0204082
solcap_snp_sl_2562	2	6.56769	0	0.00909091	0	0	0	0.1	0.1875	0	0	0.0163934	0
solcap_snp_sl_2563	2	6.57045	0	0.0272727	0	0.0434783	0.3	0.3	0.9375	0	0	0.0327869	0.0204082
solcap_snp_sl_2564	2	6.5723	0	0.0272727	0	0	0.222222	0.275	0.9375	0	0	0.0327869	0.0204082
solcap_snp_sl_2565	2	6.5801	0	0.0272727	0	0	0.3	0.275	0.9375	0	0	0.0327869	0.0204082
solcap_snp_sl_2566	2	6.58034	0	0.0272727	0	0.0416667	0.3	0.282051	0.9375	0	0	0.0327869	0.0204082
solcap_snp_sl_2570	2	6.5973	0	0.0272727	0	0.0434783	0.3	0.3	0.9375	0	0	0.0327869	0.0204082
solcap_snp_sl_2572	2	6.59988	0	0.0272727	0	0.0434783	0.3	0.275	0.9375	0	0	0.0327869	0.0204082
solcap_snp_sl_2573	2	6.6032	0	0.00909091	0	0	0	0.1	0.1875	0	0	0.0163934	0
solcap_snp_sl_44555	2	6.61013	0	0.0272727	0	0	0.222222	0.275	0.9375	0	0	0.0327869	0.0204082
solcap_snp_sl_2575	2	6.61029	0	0.0272727	0	0	0.3	0.3	0.9375	0	0	0.0327869	0.0204082
solcap_snp_sl_44556	2	6.61163	0	0.00909091	0	0	0	0.0243902	0.1875	0	0	0.0163934	0
solcap_snp_sl_2580	2	6.91221	0	0.0183486	0	0.0434783	0.3	0.25641	0.916667	0	0	0.0166667	0.0204082
solcap_snp_sl_2590	2	6.94174	0	0.0272727	0	0.0416667	0.3	0.275	0.9375	0	0	0.0327869	0.0204082
solcap_snp_sl_2591	2	6.94174	0	0.0272727	0	0	0.3	0.275	0.9375	0	0	0.0327869	0.0204082
solcap_snp_sl_2592	2	7.19728	0	0.00909091	0	0	0	0.097561	0.0625	0	0	0.0163934	0
solcap_snp_sl_28328	2	7.83111	0	0.0183486	0	0	0.222222	0.275	0.928571	0	0	0.0327869	0
solcap_snp_sl_28329	2	7.84758	0	0.0272727	0	0.0434783	0.3	0.3	0.9375	0	0	0.0327869	0.0204082
solcap_snp_sl_28335	2	8.1389	0	0.0272727	0	0	0.222222	0.3	0.9375	0	0	0.0327869	0.0204082
solcap_snp_sl_28337	2	8.85335	0	0.0272727	0	0	0.222222	0.282051	0.9375	0	0	0.0327869	0.0204082
solcap_snp_sl_28338	2	8.85347	0	0.0280374	0.0363636	0.166667	0.333333	0.692308	1	0	0	0.0327869	0.0217391
solcap_snp_sl_44564	2	9.17244	0	0.0181818	0	0	0.3	0.15	0.75	0	0	0.0163934	0.0204082
solcap_snp_sl_2600	2	9.17448	0	0.0272727	0	0.0434783	0.3	0.307692	0.9375	0	0	0.0327869	0.0204082
solcap_snp_sl_2603	2	9.18121	0	0.00909091	0	0	0	0.1	0.0625	0	0	0.0163934	0
solcap_snp_sl_28340	2	9.57634	0	0.0181818	0	0	0.3	0.15	0.75	0	0	0.0163934	0.0204082
solcap_snp_sl_2604	2	9.57767	0	0.00909091	0	0	0	0.102564	0.1875	0	0	0.0163934	0
solcap_snp_sl_28343	2	9.86692	0	0.0272727	0	0.0434783	0.222222	0.307692	0.9375	0	0	0.0327869	0.0204082
solcap_snp_sl_2606	2	10.4227	0	0.00909091	0	0	0	0.097561	0.0625	0	0	0.0163934	0
solcap_snp_sl_2607	2	10.4234	0	0.0272727	0	0.0434783	0.222222	0.275	0.9375	0	0	0.0327869	0.0204082
solcap_snp_sl_6260	2	10.9835	0	0.00909091	0	0	0	0.0731707	0	0	0	0.0163934	0
solcap_snp_sl_6259	2	10.9837	0	0.00909091	0	0	0	0.1	0.1875	0	0	0.0163934	0
solcap_snp_sl_6255	2	11.0418	0.416667	0.281553	0.365385	0.28	0.0909091	0.209302	0	0.217949	0.765957	0.333333	0.217391
solcap_snp_sl_6253	2	11.0432	0	0.00909091	0	0	0	0.1	0.1875	0	0	0.0163934	0
solcap_snp_sl_6249	2	11.083	0	0.0272727	0	0	0.222222	0.275	0.9375	0	0	0.0327869	0.0204082
solcap_snp_sl_6247	2	11.0832	0	0.0272727	0	0.0434783	0.222222	0.275	0.9375	0	0	0.0327869	0.0204082
solcap_snp_sl_31198	2	11.0838	0	0.00909091	0	0	0	0.0243902	0.1875	0	0	0.0163934	0
solcap_snp_sl_31196	2	11.5606	0	0.00909091	0	0	0	0.0243902	0.1875	0	0	0.0163934	0
solcap_snp_sl_6240	2	12.0141	0	0.0272727	0	0.0833333	0.3	0.3	0.9375	0	0	0.0327869	0.0204082
solcap_snp_sl_6239	2	12.0163	0	0.0272727	0	0	0.222222	0.3	0.9375	0	0	0.0327869	0.0204082
solcap_snp_sl_6238	2	12.0924	0	0.00909091	0	0	0	0.1	0.25	0	0	0.0163934	0
solcap_snp_sl_31193	2	12.2782	0	0.0272727	0	0.0434783	0.3	0.3	0.9375	0	0	0.0327869	0.0204082
solcap_snp_sl_31192	2	12.9219	0	0.0181818	0	0	0.222222	0.146341	0.6875	0	0	0.0163934	0.0204082
solcap_snp_sl_31191	2	12.9219	0	0.0272727	0	0.0434783	0.3	0.3	0.9375	0	0	0.0327869	0.0204082
solcap_snp_sl_31190	2	12.922	0	0.0272727	0	0.0434783	0.3	0.3	0.9375	0	0	0.0327869	0.0204082
solcap_snp_sl_31189	2	12.9406	0	0.0272727	0	0	0.222222	0.275	0.9375	0	0	0.0327869	0.0204082
solcap_snp_sl_6233	2	13.0108	0	0.00909091	0	0	0	0.0731707	0	0	0	0.0163934	0
solcap_snp_sl_53126	2	13.1042	0	0.0272727	0	0.0434783	0.3	0.3	0.9375	0	0	0.0327869	0.0204082
solcap_snp_sl_6229	2	13.1349	0	0.0272727	0	0	0.222222	0.3	0.9375	0	0	0.0327869	0.0204082
solcap_snp_sl_6228	2	13.135	0	0.0272727	0	0.0416667	0.3	0.3	0.9375	0	0	0.0327869	0.0204082
solcap_snp_sl_6227	2	13.135	0	0.0272727	0	0	0.3	0.3	0.9375	0	0	0.0327869	0.0204082
solcap_snp_sl_6226	2	13.2228	0	0.0280374	0.0350877	0.2	0.333333	0.675	1	0	0	0.0327869	0.0217391
solcap_snp_sl_31184	2	13.236	0	0.00909091	0	0	0	0.0243902	0.1875	0	0	0.0163934	0
solcap_snp_sl_6221	2	13.3299	0	0.00909091	0	0	0	0.1	0.1875	0	0	0.0163934	0
solcap_snp_sl_31179	2	13.4224	0	0.0181818	0	0	0	0.025	0.6	0	0	0.0163934	0.0204082
solcap_snp_sl_6206	2	13.4291	0	0.0272727	0	0.0434783	0.4	0.3	0.9375	0	0	0.0327869	0.0204082
solcap_snp_sl_6203	2	13.5828	0	0.00909091	0	0	0	0.0731707	0.0625	0	0	0.0163934	0
solcap_snp_sl_6202	2	13.877	0	0.00909091	0	0	0	0.0731707	0	0	0	0.0163934	0
solcap_snp_sl_6201	2	13.877	0	0.0272727	0	0	0	0.162162	0.866667	0	0	0.0327869	0.0204082
solcap_snp_sl_6199	2	13.8858	0	0.0272727	0	0.0416667	0	0.162162	0.866667	0	0	0.0327869	0.0204082
solcap_snp_sl_6196	2	13.9052	0.413534	0.238095	0.137931	0.230769	0.0909091	0.139535	0	0.21519	0.765957	0.333333	0.125
solcap_snp_sl_6195	2	13.9054	0	0.0272727	0	0	0	0.135135	0.866667	0	0	0.0327869	0.0204082
solcap_snp_sl_6194	2	13.9054	0	0.0272727	0	0.0416667	0	0.162162	0.866667	0	0	0.0327869	0.0204082
solcap_snp_sl_6192	2	13.9084	0	0.0272727	0	0	0.4	0.3	0.9375	0	0	0.0327869	0.0204082
solcap_snp_sl_6190	2	13.95	0	0.00909091	0	0	0	0.0731707	0	0	0	0.0163934	0
solcap_snp_sl_6189	2	13.9501	0	0.0272727	0	0	0	0.162162	0.866667	0	0	0.0327869	0.0204082
solcap_snp_sl_6186	2	14.0135	0	0.00909091	0	0	0	0.0731707	0	0	0	0.0163934	0
solcap_snp_sl_6185	2	14.0166	0	0.0272727	0	0.12	0.4	0.3	0.9375	0	0	0.0327869	0.0204082
solcap_snp_sl_6184	2	14.0173	0	0.0272727	0	0	0	0.135135	0.866667	0	0	0.0327869	0.0204082
solcap_snp_sl_6183	2	14.0417	0	0.0272727	0	0.0416667	0	0.135135	0.866667	0	0	0.0327869	0.0204082
solcap_snp_sl_53120	2	14.0699	0	0.0272727	0	0	0	0.135135	0.866667	0	0	0.0327869	0.0204082
solcap_snp_sl_6180	2	14.294	0	0.0272727	0	0	0	0.135135	0.866667	0	0	0.0327869	0.0204082
solcap_snp_sl_6177	2	14.3326	0	0.0272727	0	0.0416667	0	0.135135	0.875	0	0	0.0327869	0.0204082
solcap_snp_sl_6176	2	14.3326	0	0.0272727	0	0	0	0.135135	0.866667	0	0	0.0327869	0.0204082
solcap_snp_sl_26911	2	14.8408	0	0.00909091	0	0	0	0.0243902	0.1875	0	0	0.0163934	0
solcap_snp_sl_1379	2	14.9811	0	0.0272727	0	0	0	0.131579	0.785714	0	0	0.0327869	0.0204082
solcap_snp_sl_1380	2	14.9833	0	0.0272727	0	0.0434783	0.4	0.275	0.9375	0	0	0.0327869	0.0204082
solcap_snp_sl_40819	2	14.9835	0	0.0272727	0	0.04	0	0.135135	0.866667	0	0	0.0327869	0.0204082
solcap_snp_sl_1381	2	14.9836	0	0.0272727	0	0	0	0.131579	0.8	0	0	0.0327869	0.0204082
solcap_snp_sl_1382	2	14.9837	0	0.0280374	0.0344828	0.166667	0.444444	0.675	1	0	0	0.0327869	0.0217391
solcap_snp_sl_1383	2	14.9845	0	0.0315789	0	0.0416667	0	0.238095	0.866667	0	0	0.0377358	0.0238095
solcap_snp_sl_1384	2	14.9861	0	0.0272727	0	0.0833333	0.333333	0.275	0.9375	0	0	0.0327869	0.0204082
solcap_snp_sl_1385	2	14.9861	0	0.0272727	0	0.04	0.4	0.275	0.9375	0	0	0.0327869	0.0204082
solcap_snp_sl_1386	2	15.1285	0	0.0272727	0	0.0416667	0	0.135135	0.875	0	0	0.0327869	0.0204082
solcap_snp_sl_40820	2	15.1291	0	0.00909091	0	0	0	0.0243902	0.1875	0	0	0.0163934	0
solcap_snp_sl_40823	2	15.1834	0	0.0183486	0	0	0.4	0.205128	0.866667	0	0	0.0166667	0.0204082
solcap_snp_sl_5885	2	15.3848	0	0.0272727	0	0.0833333	0.333333	0.275	0.9375	0	0	0.0327869	0.0204082
solcap_snp_sl_31002	2	15.3849	0	0.0272727	0	0.0434783	0.4	0.275	0.9375	0	0	0.0327869	0.0204082
solcap_snp_sl_52609	2	15.4021	0	0.0272727	0	0.0434783	0.4	0.275	0.9375	0	0	0.0327869	0.0204082
solcap_snp_sl_52608	2	15.4153	0	0.0272727	0	0.0434783	0.4	0.275	0.9375	0	0	0.0327869	0.0204082
solcap_snp_sl_5884	2	15.4223	0	0.0272727	0	0	0.333333	0.275	0.9375	0	0	0.0327869	0.0204082
solcap_snp_sl_5883	2	15.4235	0	0.0272727	0	0.0434783	0.333333	0.275	0.9375	0	0	0.0327869	0.0204082
solcap_snp_sl_5882	2	15.4968	0	0.0272727	0	0	0.333333	0.275	0.9375	0	0	0.0327869	0.0204082
solcap_snp_sl_5881	2	15.4969	0	0.0272727	0	0.0434783	0.4	0.275	0.9375	0	0	0.0327869	0.0204082
solcap_snp_sl_5879	2	15.504	0	0.0272727	0	0.0833333	0.4	0.275	0.9375	0	0	0.0327869	0.0204082
solcap_snp_sl_5875	2	15.5725	0	0.0272727	0	0.0434783	0.333333	0.275	0.9375	0	0	0.0327869	0.0204082
solcap_snp_sl_5872	2	15.631	0	0.0272727	0	0.0434783	0.333333	0.275	0.9375	0	0	0.0327869	0.0204082
solcap_snp_sl_5871	2	15.6311	0	0.0181818	0	0	0.4	0.225	0.666667	0	0	0.0163934	0.0204082
solcap_snp_sl_69276	2	15.6983	0	0.00909091	0	0.04	0	0.0243902	0.266667	0	0	0.0163934	0
solcap_snp_sl_11572	2	15.6992	0	0.0272727	0	0.08	0.4	0.275	0.9375	0	0	0.0327869	0.0204082
solcap_snp_sl_69274	2	15.6996	0	0.00909091	0	0.0416667	0	0.0243902	0.266667	0	0	0.0163934	0
solcap_snp_sl_11569	2	15.6998	0	0.0181818	0	0	0.333333	0.225	0.6	0	0	0.0163934	0.0204082
solcap_snp_sl_32184	2	15.7646	0	0.00909091	0	0.0416667	0	0.0243902	0.266667	0	0	0.0163934	0
solcap_snp_sl_32181	2	15.8176	0	0.00909091	0	0	0	0.0243902	0.266667	0	0	0.0163934	0
solcap_snp_sl_7418	2	16.0124	0	0.00909091	0	0	0	0.0731707	0.125	0	0	0.0163934	0
solcap_snp_sl_7416	2	16.1888	0	0.0272727	0	0.08	0.363636	0.275	0.9375	0	0	0.0327869	0.0204082
solcap_snp_sl_56944	2	16.5775	0	0.0272727	0	0.0434783	0.4	0.275	0.933333	0	0	0.0327869	0.0204082
solcap_snp_sl_32178	2	16.5778	0	0.00909091	0	0	0	0.0238095	0.0666667	0	0	0.0163934	0
solcap_snp_sl_7413	2	16.5844	0	0.0272727	0	0.08	0.4	0.275	0.933333	0	0	0.0327869	0.0204082
solcap_snp_sl_5308	2	17.4786	0	0.00909091	0	0	0	0.075	0.1875	0	0	0.0163934	0
Le005962_147	2	17.479	0	0.0272727	0	0	0	0.135135	0.866667	0	0	0.0327869	0.0204082
solcap_snp_sl_30414	2	17.6305	0	0.0272727	0	0	0.4	0.275	0.9375	0	0	0.0327869	0.0204082
solcap_snp_sl_5306	2	17.6305	0	0.0272727	0	0.04	0.4	0.275	0.933333	0	0	0.0327869	0.0204082
solcap_snp_sl_30413	2	17.6323	0	0.0272727	0	0	0.4	0.275	0.9375	0	0	0.0327869	0.0204082
solcap_snp_sl_30412	2	17.6536	0	0.0272727	0	0.0416667	0.333333	0.275	0.9375	0	0	0.0327869	0.0204082
solcap_snp_sl_51537	2	17.7554	0	0.0272727	0	0	0.333333	0.275	0.9375	0	0	0.0327869	0.0204082
solcap_snp_sl_5305	2	17.7558	0	0.0272727	0	0.04	0.4	0.275	0.9375	0	0	0.0327869	0.0204082
solcap_snp_sl_5304	2	17.7561	0	0.0181818	0	0	0.4	0.275	0.666667	0	0	0.0327869	0
solcap_snp_sl_5303	2	17.7563	0	0.0181818	0	0	0.333333	0.275	0.666667	0	0	0.0327869	0
solcap_snp_sl_5301	2	17.7788	0	0.0181818	0	0	0	0.105263	0.5	0	0	0.0327869	0
solcap_snp_sl_5300	2	17.7897	0	0.0272727	0	0.0833333	0.4	0.275	0.9375	0	0	0.0327869	0.0204082
solcap_snp_sl_5299	2	17.7901	0	0.0272727	0	0.0833333	0.4	0.275	0.9375	0	0	0.0327869	0.0204082
solcap_snp_sl_30408	2	17.798	0	0	0	0	0	0	0	0	0	0	0
solcap_snp_sl_5293	2	17.8009	0	0.0272727	0	0.0416667	0.4	0.275	0.9375	0	0	0.0327869	0.0204082
solcap_snp_sl_5285	2	17.9319	0	0.0272727	0	0	0	0.135135	0.533333	0	0	0.0327869	0.0204082
solcap_snp_sl_5284	2	17.9488	0	0.00909091	0	0	0	0.075	0.0625	0	0	0.0163934	0
solcap_snp_sl_5283	2	18.2137	0	0.0272727	0	0.04	0.333333	0.282051	0.9375	0	0	0.0327869	0.0204082
solcap_snp_sl_5280	2	18.3094	0	0.0181818	0	0.037037	0.4	0.175	0.2	0	0	0.0163934	0.0204082
solcap_snp_sl_5277	2	18.7132	0	0.00909091	0	0.037037	0.4	0.175	0.2	0	0	0.0163934	0
solcap_snp_sl_5276	2	18.7144	0	0.0181818	0	0.037037	0.4	0.175	0.2	0	0	0.0163934	0.0204082
solcap_snp_sl_30399	2	18.948	0	0.00909091	0	0	0	0.0263158	0.75	0	0	0.0163934	0
solcap_snp_sl_51535	2	19.1934	0	0.0181818	0	0	0	0.025641	0.75	0	0	0.0163934	0.0204082
solcap_snp_sl_5270	2	19.1954	0	0.00909091	0	0.037037	0.4	0.175	0.2	0	0	0.0163934	0
solcap_snp_sl_5269	2	19.1961	0	0.00909091	0	0.037037	0.4	0.175	0.2	0	0	0.0163934	0
solcap_snp_sl_5268	2	19.2232	0	0.0272727	0	0.08	0.4	0.25	0.875	0	0	0.0327869	0.0204082
solcap_snp_sl_13842	2	20.0692	0.402985	0.235849	0.189655	0.230769	0.0909091	0.0697674	0	0.202532	0.75	0.327586	0.125
solcap_snp_sl_51532	2	20.0692	0	0.0272727	0.0350877	0.16	0.444444	0.6	0.9375	0	0	0.0327869	0.0204082
solcap_snp_sl_51531	2	20.1063	0	0.00909091	0	0	0	0.0238095	0.0666667	0	0	0.0163934	0
solcap_snp_sl_5266	2	20.1362	0.406015	0.285714	0.298246	0.269231	0.0909091	0.162791	0	0.202532	0.765957	0.344828	0.212766
solcap_snp_sl_5263	2	20.1489	0	0.00909091	0	0	0	0.0731707	0	0	0	0.0163934	0
solcap_snp_sl_5262	2	20.17	0	0.00909091	0	0	0	0.075	0.266667	0	0	0.0163934	0
SL10028_121	2	20.1704	0	0.00909091	0	0	0	0.075	0.266667	0	0	0.0163934	0
solcap_snp_sl_5261	2	20.1715	0	0.0272727	0	0	0	0.108108	0.933333	0	0	0.0327869	0.0204082
solcap_snp_sl_5260	2	20.1715	0	0.0272727	0	0.08	0.333333	0.275	0.9375	0	0	0.0327869	0.0204082
solcap_snp_sl_5257	2	20.1762	0	0.00909091	0	0	0	0.075	0.266667	0	0	0.0163934	0
solcap_snp_sl_5256	2	20.1852	0	0.0272727	0	0.0384615	0	0.135135	0.875	0	0	0.0327869	0.0204082
solcap_snp_sl_5251	2	20.2457	0	0.00909091	0	0	0	0.0731707	0	0	0	0.0163934	0
solcap_snp_sl_1393	2	21.1871	0	0.0272727	0	0.08	0.4	0.275	0.9375	0	0	0.0327869	0.0204082
solcap_snp_sl_26935	2	21.1912	0	0.00909091	0	0	0	0.0238095	0.0666667	0	0	0.0163934	0
solcap_snp_sl_1391	2	21.2845	0	0.0272727	0	0.08	0.4	0.275	0.75	0	0	0.0327869	0.0204082
solcap_snp_sl_12647	2	21.2851	0.40146	0.54902	0.37931	0.166667	0.111111	0.0238095	0	0.54321	0.204082	0.576271	0.511628
solcap_snp_sl_1390	2	21.2851	0	0.0272727	0	0.08	0.4	0.275	0.733333	0	0	0.0327869	0.0204082
solcap_snp_sl_1389	2	21.2861	0	0.00909091	0	0	0	0.0731707	0	0	0	0.0163934	0
solcap_snp_sl_1388	2	21.3099	0	0.0272727	0	0.0769231	0.4	0.275	0.733333	0	0	0.0327869	0.0204082
solcap_snp_sl_26928	2	21.3106	0	0.0181818	0	0.04	0	0.0512821	0.75	0	0	0.0163934	0.0204082
solcap_snp_sl_26923	2	21.5135	0	0.0181818	0	0.125	0.333333	0.307692	0.9375	0	0	0.0163934	0.0204082
solcap_snp_sl_30473	2	21.6728	0	0.0181818	0	0.12	0.4	0.282051	0.9375	0	0	0.0163934	0.0204082
solcap_snp_sl_30479	2	21.6895	0	0.00909091	0	0	0	0.0243902	0.6	0	0	0.0163934	0
solcap_snp_sl_30482	2	21.765	0	0.0181818	0	0.0416667	0	0.0512821	0.75	0	0	0.0163934	0.0204082
solcap_snp_sl_56955	2	22.1987	0	0.0181818	0	0	0	0.025	0.571429	0	0	0.0163934	0.0204082
solcap_snp_sl_32196	2	22.1992	0	0.0181818	0	0.0434783	0.333333	0.275	0.9375	0	0	0.0163934	0.0204082
solcap_snp_sl_944	2	24.1674	0	0.0272727	0	0.0434783	0.222222	0.3	0.9375	0	0	0.0327869	0.0204082
solcap_snp_sl_945	2	24.1807	0	0.00909091	0	0	0	0.1	0.1875	0	0	0.0163934	0
solcap_snp_sl_2037	2	24.5392	0	0.0272727	0	0.0416667	0	0.135135	0.875	0	0	0.0327869	0.0204082
solcap_snp_sl_2036	2	24.7945	0	0.00909091	0	0	0	0.097561	0.0625	0	0	0.0163934	0
solcap_snp_sl_2031	2	25.7469	0	0.0272727	0	0	0.3	0.3	0.933333	0	0	0.0327869	0.0204082
solcap_snp_sl_2030	2	25.7471	0	0.0272727	0	0	0	0.135135	0.875	0	0	0.0327869	0.0204082
solcap_snp_sl_2029	2	25.7488	0	0.0272727	0	0.0416667	0.3	0.3	0.933333	0	0	0.0327869	0.0204082
solcap_snp_sl_2028	2	25.7489	0	0.0272727	0	0	0.222222	0.3	0.9375	0	0	0.0327869	0.0204082
solcap_snp_sl_2027	2	25.749	0	0.0272727	0	0	0	0.135135	0.8	0	0	0.0327869	0.0204082
solcap_snp_sl_11798	2	26.0992	0	0.00909091	0	0	0	0.097561	0.0666667	0	0	0.0163934	0
solcap_snp_sl_70009	2	26.9623	0	0.0272727	0	0	0	0.135135	0.875	0	0	0.0327869	0.0204082
solcap_snp_sl_36890	2	26.9623	0	0.0272727	0	0.0416667	0	0.135135	0.875	0	0	0.0327869	0.0204082
solcap_snp_sl_11802	2	26.9628	0	0.00909091	0	0	0	0.097561	0.0625	0	0	0.0163934	0
solcap_snp_sl_11803	2	26.9629	0	0.0272727	0	0	0	0.135135	0.875	0	0	0.0327869	0.0204082
solcap_snp_sl_11804	2	26.9776	0	0.0272727	0	0.0416667	0.3	0.3	0.9375	0	0	0.0327869	0.0204082
solcap_snp_sl_11805	2	26.9822	0	0.0272727	0	0.0833333	0.3	0.3	0.9375	0	0	0.0327869	0.0204082
solcap_snp_sl_70010	2	27.3692	0	0.0181818	0	0	0	0.025641	0.8	0	0	0.0163934	0.0204082
solcap_snp_sl_25966	2	27.9233	0	0.00909091	0	0	0	0.0243902	0.285714	0	0	0.0163934	0
solcap_snp_sl_25974	2	28.1	0	0.0181818	0.0169492	0.0869565	0.4	0.35	0.8	0	0	0.0163934	0.0204082
CL016852-0345	2	28.1637	0	0	0	0.0740741	0.4	0.410256	0.0666667	0	0	0	0
CL016852-0159	2	28.1639	0	0	0	0	0	0	0	0	0	0	0
solcap_snp_sl_25987	2	28.2563	0	0.0181818	0.0163934	0	0	0.047619	0.625	0	0	0.0163934	0.0204082
SGN-U600984_snp332	2	28.3199	0	0.00909091	0	0	0.4	0.153846	0.9375	0	0	0	0.0204082
solcap_snp_sl_26013	2	28.4616	0.0070922	0	0	0	0	0.0238095	0.266667	0	0	0	0
solcap_snp_sl_26022	2	28.5561	0.0070922	0.00909091	0.0169492	0.16	0.4	0.307692	0.9375	0	0	0	0.0204082
Le006654_46	2	28.7988	0.0070922	0.00909091	0.0163934	0.0416667	0	0.05	0.714286	0	0	0	0.0204082
solcap_snp_sl_26050	2	28.9626	0.0070922	0.00909091	0	0	0	0.0238095	0.266667	0	0	0.0163934	0
solcap_snp_sl_26072	2	29.0958	0.109489	0.0277778	0.410714	0.416667	0.5	0.725	1	0.141026	0.0576923	0.0163934	0.0425532
solcap_snp_sl_26094	2	29.4259	0	0	0	0	0	0.0238095	0.0666667	0	0	0	0
solcap_snp_sl_26109	2	29.5048	0	0	0	0.115385	0.3	0.210526	0.666667	0	0	0	0
solcap_snp_sl_26124	2	29.7344	0	0.00909091	0	0	0	0.0232558	0.125	0	0	0.0163934	0
solcap_snp_sl_12372	2	29.7509	0.214815	0.245098	0.719298	0.64	0.888889	0.953488	1	0.139241	0.326531	0.220339	0.27907
solcap_snp_sl_38456	2	29.7927	0.0070922	0.0272727	0	0.0384615	0.222222	0.219512	0.866667	0	0	0.0163934	0.0408163
solcap_snp_sl_26129	2	29.7928	0.0070922	0.0272727	0	0.0384615	0.222222	0.225	0.9375	0	0	0.0163934	0.0408163
solcap_snp_sl_26132	2	29.8476	0.0070922	0.0272727	0	0.037037	0.2	0.238095	0.666667	0	0	0.0163934	0.0408163
solcap_snp_sl_38457	2	29.8477	0.0070922	0.0272727	0	0.0384615	0.222222	0.238095	0.666667	0	0	0.0163934	0.0408163
solcap_snp_sl_26134	2	29.8504	0.0070922	0.0272727	0	0.0384615	0.222222	0.238095	0.6	0	0	0.0163934	0.0408163
solcap_snp_sl_26136	2	29.8519	0.0070922	0.00909091	0	0	0	0.0238095	0.5	0	0	0.0163934	0
solcap_snp_sl_26147	2	29.9425	0	0	0	0	0	0.0238095	0.333333	0	0	0	0
solcap_snp_sl_26158	2	30.0772	0.0070922	0	0	0	0	0.05	0.733333	0	0	0	0
solcap_snp_sl_26168	2	30.2195	0.0070922	0.00909091	0	0	0	0.0487805	0.666667	0	0	0	0.0204082
solcap_snp_sl_36312	2	30.2523	0.0070922	0.00909091	0	0	0.222222	0.097561	0.642857	0	0	0	0.0204082
solcap_snp_sl_22259	2	30.2824	0.0070922	0.130841	0.232143	0.541667	0.6	0.780488	1	0	0	0.12069	0.142857
solcap_snp_sl_67542	2	30.301	0.0070922	0.130841	0.245614	0.541667	0.6	0.780488	1	0	0	0.12069	0.142857
solcap_snp_sl_36484	2	30.3138	0.0070922	0	0	0.04	0	0.170732	0.384615	0	0	0	0
solcap_snp_sl_36448	2	30.6547	0	0.00909091	0	0.0769231	0.2	0.275	0.875	0	0	0	0.0204082
solcap_snp_sl_15709	2	30.6743	0.0070922	0.422018	0.15	0.269231	0	0.512821	0.125	0	0	0.533333	0.285714
solcap_snp_sl_15707	2	30.7071	0.0070922	0.435185	0.133333	0.434783	0.25	0.707317	1	0	0	0.542373	0.306122
solcap_snp_sl_36443	2	30.7457	0.165468	0.466667	0.103448	0.391304	0	0.625	0.933333	0.2	0.0384615	0.596491	0.3125
solcap_snp_sl_15706	2	30.7458	0.165468	0.476636	0.133333	0.391304	0	0.625	0.933333	0.2	0.0384615	0.610169	0.3125
solcap_snp_sl_36441	2	30.8132	0	0	0	0.0384615	0.2	0.0714286	0.2	0	0	0	0
Le009381_51	2	30.826	0	0.00909091	0	0.12	0.2	0.205128	0.8125	0	0	0	0.0204082
solcap_snp_sl_67520	2	30.9664	0	0	0	0	0	0	0.0909091	0	0	0	0
solcap_snp_sl_36420	2	31.0725	0	0.00909091	0	0.12	0.2	0.368421	1	0	0	0	0.0204082
solcap_snp_sl_36419	2	31.1325	0	0	0	0.0769231	0.2	0.0769231	0.285714	0	0	0	0
solcap_snp_sl_36400	2	31.2745	0	0.00909091	0	0.125	0.2	0.230769	0.8	0	0	0	0.0204082
solcap_snp_sl_15701	2	31.3197	0.0142857	0.485981	0.12069	0.208333	0	0.232558	0.0625	0.0121951	0	0.65	0.276596
solcap_snp_sl_15699	2	31.368	0.0070922	0.420561	0.101695	0.291667	0.1	0.435897	0.333333	0	0	0.55	0.255319
solcap_snp_sl_15698	2	31.3681	0.0070922	0.415094	0.101695	0.291667	0.1	0.435897	0.333333	0	0	0.542373	0.255319
solcap_snp_sl_15697	2	31.3685	0.0070922	0.420561	0.101695	0.291667	0.1	0.435897	0.285714	0	0	0.55	0.255319
solcap_snp_sl_15696	2	31.3686	0.0070922	0.420561	0.101695	0.291667	0.1	0.435897	0.285714	0	0	0.55	0.255319
solcap_snp_sl_15693	2	31.3725	0.0070922	0.420561	0.101695	0.291667	0.1	0.435897	0.285714	0	0	0.55	0.255319
solcap_snp_sl_15690	2	31.385	0.0070922	0.409524	0.1	0.2	0	0.190476	0	0	0	0.534483	0.255319
solcap_snp_sl_15689	2	31.3852	0.0283688	0.5	0.372881	0.636364	0.444444	0.634146	0.9375	0.0243902	0.0192308	0.583333	0.391304
solcap_snp_sl_15688	2	31.3852	0.0283688	0.490385	0.339286	0.636364	0.444444	0.634146	0.9375	0.0243902	0.0192308	0.568966	0.391304
CL016047-0333	2	31.3856	0	0	0	0	0	0	0	0	0	0	0
CL016047-0183_solcap_snp_sl_36384	2	31.3858	0	0	0	0.0740741	0	0.0243902	0.0666667	0	0	0	0
solcap_snp_sl_21955	2	31.3871	0.0212766	0.0648148	0.211538	0.391304	0.6	0.475	0.9375	0.0243902	0.0192308	0.0327869	0.106383
SGN-U563909_snp1344_solcap_snp_sl_67508	2	31.4311	0	0.00909091	0	0.16	0.1	0.230769	0.9375	0	0	0	0.0204082
solcap_snp_sl_36373	2	31.4905	0	0.00909091	0	0.16	0.1	0.236842	1	0	0	0	0.0204082
SGN-U571208_snp268	2	31.5014	0	0.00909091	0	0.115385	0	0.0487805	0.733333	0	0	0	0.0204082
CL017839-0338	2	31.5118	0	0	0	0	0	0	0	0	0	0	0
solcap_snp_sl_8384	2	31.5676	0.267176	0.0555556	0.25	0.28	0.222222	0.578947	1	0.27027	0.2	0.0338983	0.0816327
solcap_snp_sl_8386	2	31.7627	0.274809	0.0642202	0.27451	0.2	0.0909091	0.135135	0.9375	0.28	0.204082	0.05	0.0816327
solcap_snp_sl_20322	2	31.7641	0	0.00909091	0.0163934	0	0	0	0	0	0	0	0.0204082
solcap_snp_sl_8388	2	31.7649	0.269231	0.0550459	0.254545	0.192308	0.0909091	0.105263	0.538462	0.27027	0.204082	0.05	0.0612245
solcap_snp_sl_8389	2	31.766	0.267176	0.0642202	0.254545	0.208333	0.0909091	0.135135	0.9375	0.27027	0.2	0.05	0.0816327
solcap_snp_sl_8393	2	31.7672	0.274809	0.0648148	0.27451	0.208333	0.0909091	0.135135	0.9375	0.28	0.204082	0.0508475	0.0816327
solcap_snp_sl_33199	2	31.7676	0	0	0	0.115385	0	0.047619	0.461538	0	0	0	0
solcap_snp_sl_8397	2	31.7689	0.269231	0.0648148	0.27451	0.208333	0.0909091	0.135135	0.9375	0.27027	0.204082	0.0508475	0.0816327
solcap_snp_sl_33205	2	31.7904	0	0	0	0.111111	0	0.0487805	0.4375	0	0	0	0
solcap_snp_sl_20325	2	31.8215	0.282443	0.0642202	0.333333	0.25	0.222222	0.538462	0.9375	0.28	0.204082	0.05	0.0816327
solcap_snp_sl_8402	2	31.8824	0.276923	0.0648148	0.346154	0.166667	0.222222	0.275	0.866667	0.27027	0.204082	0.0508475	0.0816327
Le017925_27_solcap_snp_sl_33223	2	31.8854	0	0.00909091	0	0.16	0.1	0.25	0.875	0	0	0	0.0204082
solcap_snp_sl_8405	2	31.8992	0.274809	0.0648148	0.365385	0.25	0.375	0.425	0.9375	0.266667	0.204082	0.0508475	0.0816327
solcap_snp_sl_8408	2	31.9066	0.272727	0.0642202	0.339286	0.25	0.333333	0.425	0.9375	0.266667	0.2	0.05	0.0816327
solcap_snp_sl_8409	2	31.9206	0.292308	0.0550459	0.37037	0.12	0.0909091	0.282051	0.928571	0.293333	0.208333	0.05	0.0612245
SGN-U578164_snp2086	2	31.9417	0	0.00909091	0	0.24	0.2	0.282051	0.9375	0	0	0	0.0204082
solcap_snp_sl_8421	2	31.9746	0.0285714	0.0272727	0.277778	0.16	0.333333	0.375	0.9375	0.0243902	0	0	0.0612245
solcap_snp_sl_33242	2	31.975	0	0.00909091	0	0.12	0	0.0487805	0.857143	0	0	0	0.0204082
solcap_snp_sl_8423	2	31.9755	0.0285714	0.0272727	0.277778	0.16	0.333333	0.375	0.9375	0.0243902	0	0	0.0612245
solcap_snp_sl_8426	2	31.9778	0.0285714	0.0272727	0.277778	0.16	0.333333	0.375	0.9375	0.0243902	0	0	0.0612245
solcap_snp_sl_20340	2	32.0185	0.235294	0.0555556	0.290909	0.375	0.625	0.589744	0.0625	0.151899	0.4	0.0327869	0.0851064
solcap_snp_sl_20344	2	32.1433	0.237037	0.339623	0.293103	0.5	0.666667	0.307692	0.0625	0.153846	0.4	0.366667	0.304348
solcap_snp_sl_33255	2	32.183	0	0.00909091	0	0.0740741	0	0.075	0.733333	0	0	0	0.0204082
solcap_snp_sl_24721	2	32.2256	0.220588	0.0181818	0.0833333	0.115385	0	0.0238095	0	0.126582	0.4	0.0163934	0.0204082
solcap_snp_sl_14946	2	32.2654	0.302158	0.0275229	0.321429	0.0769231	0.0833333	0.27027	0.666667	0.426829	0.12	0	0.0625
solcap_snp_sl_20358	2	32.2802	0.306569	0.0275229	0.296296	0.153846	0.3	0.475	0.9375	0.439024	0.104167	0	0.0625
solcap_snp_sl_20361	2	32.3118	0.309353	0.0275229	0.303571	0.115385	0.3	0.475	0.9375	0.439024	0.12	0	0.0625
solcap_snp_sl_8439	2	32.3735	0.364286	0.0275229	0.298246	0.153846	0.3	0.375	0.875	0.439024	0.27451	0	0.0625
solcap_snp_sl_8441	2	32.3954	0.359712	0.0185185	0.303571	0.148148	0.3	0.428571	0.909091	0.439024	0.26	0	0.0425532
solcap_snp_sl_33302	2	32.4348	0.00714286	0.00909091	0	0.08	0.2	0.142857	0.8125	0.0121951	0	0	0.0204082
CL017477-0069	2	32.4783	0	0	0	0	0	0	0	0	0	0	0
CL017477-0450	2	32.4787	0	0	0	0	0	0.139535	0.0666667	0	0	0	0
Le005019_205	2	32.5296	0.00714286	0.00909091	0	0.037037	0	0.0243902	0.615385	0.0121951	0	0	0.0204082
CL017603-0474	2	32.5613	0	0	0	0	0	0	0	0	0	0	0
CL016491-0436_solcap_snp_sl_33330	2	32.6185	0.00714286	0.00909091	0	0.153846	0.2	0.292683	0.9375	0.0121951	0	0	0.0204082
solcap_snp_sl_33334	2	32.6443	0	0	0	0.0769231	0.2	0.0714286	0.214286	0	0	0	0
CL015942-0231_solcap_snp_sl_33337	2	32.6514	0.00714286	0	0	0.08	0	0.195122	0.466667	0.0121951	0	0	0
solcap_snp_sl_14951	2	32.7074	0.189781	0.457944	0.310345	0.16	0.125	0	0	0.1875	0.2	0.416667	0.510638
solcap_snp_sl_59581	2	32.7075	0.00714286	0.00909091	0	0.037037	0	0.0487805	0.714286	0.0121951	0	0	0.0204082
CL015849-0329	2	32.9314	0	0	0	0	0	0	0	0	0	0	0
solcap_snp_sl_33416	2	32.9948	0.0070922	0.00909091	0	0.04	0	0.15	0.75	0.0121951	0	0	0.0204082
CL016463-0326_solcap_snp_sl_33432	2	33.1212	0.0070922	0.00909091	0	0.115385	0.333333	0.307692	0.9375	0.0121951	0	0	0.0204082
solcap_snp_sl_8464	2	33.1226	0.42963	0.566038	0.672414	0.48	0.222222	0.195122	0	0.474359	0.3	0.542373	0.595745
solcap_snp_sl_33459	2	33.3402	0.0070922	0	0	0	0	0.047619	0.428571	0.0121951	0	0	0
SGN-U315881_T1698_snp147	2	33.3578	0.0070922	0.00909091	0	0.04	0.3	0.125	0.875	0.0121951	0	0	0.0204082
solcap_snp_sl_33469	2	33.3733	0.0070922	0.00909091	0	0.0769231	0.222222	0.25	0.9375	0.0121951	0	0	0.0204082
Le001778_68_solcap_snp_sl_33474	2	33.5383	0.224638	0.0275229	0.0163934	0.12	0	0.179487	0.866667	0.243902	0.22449	0	0.0625
solcap_snp_sl_59619	2	33.6917	0.213235	0.0275229	0.0163934	0.153846	0	0.0952381	0.214286	0.234568	0.208333	0	0.0625
SGN-U574493_snp71	2	33.7532	0.0142857	0.0181818	0.0169492	0.259259	0.272727	0.365854	1	0.0121951	0.0196078	0.0163934	0.0204082
CL017156-0308_solcap_snp_sl_33519	2	33.7613	0.00714286	0.0181818	0	0.0740741	0.272727	0.146341	0.9375	0.0121951	0	0.0163934	0.0204082
solcap_snp_sl_33524	2	33.7855	0.00714286	0.0181818	0	0.148148	0.272727	0.146341	0.9375	0.0121951	0	0.0163934	0.0204082
CL015430-0435	2	33.8037	0	0	0	0	0	0	0	0	0	0	0
SGN-U586107_snp378_solcap_snp_sl_33547	2	33.818	0.00714286	0.0181818	0	0.115385	0.272727	0.175	0.9375	0.0121951	0	0.0163934	0.0204082
SL20141_109_CL009129-0540_solcap_snp_sl_33558	2	33.8387	0.00714286	0.0181818	0	0.115385	0.272727	0.15	0.9375	0.0121951	0	0.0163934	0.0204082
solcap_snp_sl_33579	2	34.0032	0.00714286	0.00917431	0	0.08	0	0.125	0.9375	0.0123457	0	0.0163934	0
solcap_snp_sl_8505	2	34.034	0.0514706	0.287037	0.298246	0.56	0.545455	0.538462	1	0.0625	0	0.322034	0.244898
solcap_snp_sl_8510	2	34.0922	0.037037	0.238095	0.25	0.28	0.111111	0.375	0.230769	0.025641	0.02	0.305085	0.152174
solcap_snp_sl_59647	2	34.0969	0.283582	0.339623	0.526316	0.72	0.8	0.725	0.923077	0.307692	0.244898	0.327586	0.354167
solcap_snp_sl_33595	2	34.1028	0.235294	0.0555556	0.0166667	0.12	0	0.102564	0.9375	0.259259	0.229167	0.0327869	0.0851064
SGN-U568794_snp106	2	34.1658	0.235294	0.0550459	0.0166667	0.0769231	0	0.0714286	0.1875	0.259259	0.229167	0.0327869	0.0833333
solcap_snp_sl_8512	2	34.1829	0.0367647	0.280374	0.551724	0.576923	0.909091	0.625	0.0666667	0.0379747	0	0.305085	0.25
solcap_snp_sl_8514	2	34.1957	0.285714	0.342857	0.581818	0.846154	0.909091	0.829268	1	0.307692	0.25	0.327586	0.361702
solcap_snp_sl_33611	2	34.235	0.237037	0.0555556	0.0166667	0.08	0	0.075	0.5	0.2625	0.229167	0.0327869	0.0851064
CL017581-0470_solcap_snp_sl_33624	2	34.2867	0.343066	0.0857143	0.0166667	0.08	0	0.1	0.642857	0.402439	0.208333	0.0333333	0.155556
solcap_snp_sl_33633	2	34.3477	0.343066	0.0841121	0.0166667	0.0769231	0	0.0714286	0.125	0.402439	0.208333	0.0327869	0.152174
solcap_snp_sl_8524	2	34.3828	0.30303	0.480769	0.368421	0.32	0.181818	0.195122	0	0.423077	0.12766	0.508772	0.446809
solcap_snp_sl_33636	2	34.3887	0.343066	0.0943396	0.0166667	0.125	0.363636	0.205128	0.857143	0.402439	0.208333	0.0327869	0.177778
CL005464-0159	2	34.5069	0	0	0	0	0	0	0	0	0	0	0
CL005464-0069	2	34.507	0	0	0	0.037037	0	0.0238095	0.0769231	0	0	0	0
solcap_snp_sl_10569	2	34.5542	0.280303	0.141509	0.105263	0.04	0.0909091	0.190476	0	0.166667	0.489362	0.133333	0.152174
solcap_snp_sl_36037	2	34.6008	0.34058	0.0952381	0.0166667	0.166667	0.4	0.236842	0.9375	0.395062	0.24	0.0327869	0.181818
solcap_snp_sl_10567	2	34.6155	0.646154	0.252427	0.175439	0.461538	0.666667	0.666667	1	0.584416	0.76087	0.166667	0.372093
solcap_snp_sl_10564	2	34.6331	0.643411	0.262136	0.175439	0.36	0.636364	0.5	0.9375	0.578947	0.76087	0.169492	0.386364
CL015660-0224_solcap_snp_sl_36017	2	34.6372	0.34058	0.121495	0.0166667	0.130435	0.454545	0.216216	0.8	0.395062	0.24	0.0327869	0.23913
solcap_snp_sl_10563	2	34.6568	0.352518	0.140187	0.2	0.291667	0.6	0.526316	1	0.395062	0.254902	0.0491803	0.26087
solcap_snp_sl_10557	2	34.6835	0.366906	0.140187	0.183333	0.391304	0.6	0.65	1	0.395062	0.294118	0.0491803	0.26087
solcap_snp_sl_36004	2	34.6901	0.34058	0.121495	0.0166667	0.173913	0.454545	0.236842	0.875	0.395062	0.24	0.0327869	0.23913
solcap_snp_sl_10552	2	34.7141	0.369565	0.146789	0.465517	0.6	0.363636	0.682927	0.714286	0.395062	0.3	0.0491803	0.270833
solcap_snp_sl_66052	2	34.8677	0.343066	0.138889	0.0166667	0.208333	0.4	0.375	0.9375	0.4	0.24	0.0491803	0.255319
CL009018-1241	2	34.8801	0.347826	0.138889	0.0166667	0.208333	0.4	0.410256	0.9375	0.407407	0.24	0.0491803	0.255319
2875_4_240_2875_4b_77_b	2	34.91	0.347826	0.100917	0.0163934	0.0769231	0	0.238095	0.133333	0.407407	0.24	0.0491803	0.166667
2875_4_300	2	34.91	0.347826	0.100917	0.0163934	0.0769231	0	0.333333	0.142857	0.407407	0.24	0.0491803	0.166667
2875_4b_205_b_2875_4_368	2	34.9101	0.347826	0.100917	0.0163934	0.08	0	0.333333	0.285714	0.407407	0.24	0.0491803	0.166667
2875_4_1050	2	34.9108	0.347826	0.100917	0.0163934	0.0769231	0	0.268293	0.133333	0.407407	0.24	0.0491803	0.166667
CL003810-0351	2	34.9126	0.350365	0.138889	0.0338983	0.26087	0.4	0.4	0.9375	0.407407	0.244898	0.0491803	0.255319
SL10649_1116_solcap_snp_sl_35973	2	34.9239	0.347826	0.12844	0.0333333	0.217391	0	0.315789	0.538462	0.407407	0.24	0.0491803	0.229167
solcap_snp_sl_10534	2	34.93	0.310606	0.376147	0.610169	0.48	0.444444	0.214286	0.0625	0.402597	0.125	0.409836	0.333333
solcap_snp_sl_10533	2	34.9322	0.318519	0.490909	0.35	0.185185	0.5	0.378378	0.0714286	0.166667	0.6	0.540984	0.428571
solcap_snp_sl_10531	2	34.9332	0.323529	0.490909	0.35	0.2	0.5	0.378378	0.142857	0.177215	0.6	0.540984	0.428571
solcap_snp_sl_10530	2	34.9557	0.311111	0.504587	0.3	0.115385	0.1	0.146341	0	0.166667	0.58	0.57377	0.416667
solcap_snp_sl_35968	2	34.9565	0.350365	0.111111	0.0333333	0.230769	0.2	0.358974	0.5	0.4	0.26	0.0491803	0.191489
solcap_snp_sl_35967	2	34.9568	0.355072	0.100917	0.0333333	0.192308	0	0.263158	0.266667	0.407407	0.26	0.0491803	0.166667
solcap_snp_sl_35964	2	34.9609	0.320611	0.02	0	0.0454545	0	0.0344828	0.0769231	0.351351	0.26	0	0.047619
solcap_snp_sl_35963	2	34.9612	0.355072	0.138889	0.0333333	0.26087	0.3	0.410256	0.875	0.407407	0.26	0.0491803	0.255319
solcap_snp_sl_10528	2	34.9709	0.315789	0.533981	0.326923	0.130435	0.111111	0.193548	0	0.168831	0.591837	0.603448	0.444444
solcap_snp_sl_35956	2	34.9744	0.352941	0.138889	0.0333333	0.291667	0.3	0.410256	0.9375	0.4	0.265306	0.0491803	0.255319
solcap_snp_sl_35955	2	34.9763	0.376812	0.138889	0.0689655	0.26087	0.375	0.536585	0.9375	0.407407	0.32	0.0491803	0.255319
solcap_snp_sl_35954	2	34.978	0.357664	0.101852	0.0333333	0.2	0	0.315789	0.384615	0.407407	0.265306	0.0491803	0.170213
solcap_snp_sl_10516	2	34.9849	0.300752	0.101852	0.338983	0.12	0.0909091	0.0465116	0	0.402597	0.122449	0.0327869	0.191489
solcap_snp_sl_35948	2	34.986	0.352941	0.100917	0.0344828	0.16	0	0.25641	0.1875	0.4	0.265306	0.0491803	0.166667
CL009186-0301_solcap_snp_sl_35943	2	34.9867	0.362319	0.100917	0.0338983	0.192308	0	0.25641	0.1875	0.407407	0.28	0.0491803	0.166667
solcap_snp_sl_35868	2	35.2968	0.37037	0.12844	0	0.173913	0	0.210526	0.9375	0.308642	0.458333	0.0491803	0.229167
SGN-U565295_snp33269	2	35.3697	0	0	0	0	0	0.097561	0.142857	0	0	0	0
SGN-U581789_snp1077_solcap_snp_sl_35846	2	35.3738	0.372263	0.111111	0	0.153846	0	0.075	0.714286	0.308642	0.46	0.0327869	0.212766
CL016381-0173_solcap_snp_sl_35845	2	35.3743	0.367647	0.111111	0	0.153846	0	0.075	0.714286	0.308642	0.44898	0.0327869	0.212766
solcap_snp_sl_35844	2	35.3913	0.37037	0.119266	0	0.0909091	0	0.184211	0.857143	0.308642	0.458333	0.0327869	0.229167
solcap_snp_sl_21744	2	35.4655	0.384615	0.305556	0.464286	0.5	0.3	0.25	0	0.519481	0.170213	0.344262	0.255319
solcap_snp_sl_35821	2	35.4934	0.0785714	0.0458716	0	0.0416667	0	0.179487	0.785714	0.0243902	0.176471	0.0327869	0.0625
CL016680-0509	2	35.5518	0.0780142	0.0366972	0	0.0769231	0	0.075	0.642857	0.0243902	0.173077	0.0327869	0.0416667
solcap_snp_sl_25485	2	35.591	0.274074	0.037037	0	0.0833333	0	0.05	0.857143	0.179487	0.46	0.0327869	0.0425532
solcap_snp_sl_25482	2	35.6637	0.278195	0.037037	0	0.0384615	0.363636	0.0769231	0.8	0.181818	0.469388	0.0327869	0.0425532
solcap_snp_sl_25481	2	35.6637	0.274074	0.037037	0	0.0384615	0	0.0487805	0.692308	0.179487	0.46	0.0327869	0.0425532
solcap_snp_sl_25477	2	35.687	0.276119	0.0275229	0	0.08	0	0.0487805	0.4	0.179487	0.469388	0.0163934	0.0416667
solcap_snp_sl_25475	2	35.6932	0.278195	0.0277778	0	0.08	0	0.0487805	0.428571	0.181818	0.469388	0.0163934	0.0425532
solcap_snp_sl_25473	2	35.6979	0.274074	0.037037	0	0.04	0.363636	0.0526316	0.714286	0.179487	0.46	0.0327869	0.0425532
solcap_snp_sl_25472	2	35.701	0.278195	0.0458716	0	0.0833333	0.363636	0.219512	0.933333	0.181818	0.469388	0.0327869	0.0625
solcap_snp_sl_25470	2	35.7026	0.278195	0.037037	0	0.0416667	0	0.131579	0.666667	0.181818	0.469388	0.0327869	0.0425532
solcap_snp_sl_35802	2	35.7044	0.274074	0.037037	0	0.0833333	0.3	0.225	0.928571	0.179487	0.46	0.0166667	0.0625
solcap_snp_sl_35798	2	35.7067	0.278195	0.0458716	0	0.0833333	0.3	0.219512	0.866667	0.181818	0.469388	0.0327869	0.0625
solcap_snp_sl_25469	2	35.7126	0.285714	0.0458716	0	0.0833333	0.363636	0.609756	0.9375	0.181818	0.489796	0.0327869	0.0625
solcap_snp_sl_35797	2	35.7348	0.278195	0.00909091	0	0.037037	0.363636	0.0512821	0.416667	0.181818	0.469388	0.0163934	0
solcap_snp_sl_25463	2	35.7473	0.278195	0.0366972	0	0.0384615	0	0.025641	0.4	0.181818	0.469388	0.0327869	0.0416667
solcap_snp_sl_25460	2	35.7495	0.278195	0.0277778	0	0.08	0	0.0243902	0.384615	0.181818	0.469388	0.0163934	0.0425532
solcap_snp_sl_25454	2	35.7878	0.278195	0.0458716	0	0.0833333	0.363636	0.225	0.933333	0.181818	0.469388	0.0327869	0.0625
solcap_snp_sl_25453	2	35.7976	0.278195	0.037037	0	0.08	0	0.0526316	0.785714	0.181818	0.469388	0.0327869	0.0425532
solcap_snp_sl_35791	2	35.7988	0.276119	0.0366972	0	0.08	0.25	0.105263	0.769231	0.179487	0.469388	0.0327869	0.0416667
solcap_snp_sl_25449	2	35.8017	0.278195	0.0181818	0	0.0769231	0.363636	0.0789474	0.357143	0.181818	0.469388	0.0327869	0
solcap_snp_sl_25448	2	35.8027	0.278195	0.0181818	0	0.037037	0	0.0487805	0.214286	0.181818	0.469388	0.0327869	0
solcap_snp_sl_25444	2	35.8761	0.278195	0.0277778	0	0.08	0	0.103448	0.416667	0.181818	0.469388	0.0163934	0.0425532
solcap_snp_sl_25443	2	35.8775	0.278195	0.0458716	0	0.0833333	0	0.153846	0.857143	0.181818	0.469388	0.0327869	0.0625
solcap_snp_sl_25442	2	35.887	0.278195	0.037037	0	0.0384615	0	0.05	0.266667	0.181818	0.469388	0.0327869	0.0425532
solcap_snp_sl_25441	2	35.8875	0.278195	0.0458716	0	0.0833333	0.363636	0.219512	0.9375	0.181818	0.469388	0.0327869	0.0625
solcap_snp_sl_25440	2	35.8876	0.278195	0.037037	0	0.04	0	0.05	0.266667	0.181818	0.469388	0.0327869	0.0425532
solcap_snp_sl_25439	2	35.8879	0.278195	0.037037	0	0.0384615	0	0.05	0.266667	0.181818	0.469388	0.0327869	0.0425532
solcap_snp_sl_25438	2	35.8882	0.278195	0.037037	0	0.0384615	0	0.05	0.266667	0.181818	0.469388	0.0327869	0.0425532
solcap_snp_sl_35789	2	35.8887	0.278195	0.037037	0	0.0384615	0	0.05	0.266667	0.181818	0.469388	0.0327869	0.0425532
solcap_snp_sl_25433	2	35.8903	0.278195	0.0458716	0	0.0833333	0.363636	0.219512	0.9375	0.181818	0.469388	0.0327869	0.0625
solcap_snp_sl_35787	2	35.8904	0.278195	0.037037	0	0.0384615	0	0.05	0.266667	0.181818	0.469388	0.0327869	0.0425532
solcap_snp_sl_25432	2	35.9041	0.278195	0.0272727	0	0.04	0	0.157895	0.733333	0.181818	0.469388	0.0327869	0.0204082
solcap_snp_sl_25431	2	35.9046	0.278195	0.0181818	0	0	0	0.075	0.25	0.181818	0.469388	0.0327869	0
solcap_snp_sl_35784	2	35.9142	0.281481	0.0458716	0	0.0833333	0.333333	0.609756	0.9375	0.179487	0.48	0.0327869	0.0625
solcap_snp_sl_25429	2	35.9314	0.278195	0.00909091	0	0	0	0.0731707	0.1875	0.181818	0.469388	0.0163934	0
solcap_snp_sl_25428	2	35.9321	0.278195	0.00909091	0	0	0	0.0731707	0.1875	0.181818	0.469388	0.0163934	0
solcap_snp_sl_35780	2	35.9469	0.270677	0.0277778	0	0	0	0.121951	0.25	0.168831	0.469388	0.0163934	0.0425532
solcap_snp_sl_35779	2	35.9493	0.278195	0.0555556	0	0.0416667	0.333333	0.658537	1	0.168831	0.489796	0.0327869	0.0851064
solcap_snp_sl_35778	2	35.9496	0.268657	0.037037	0	0.0384615	0	0.125	0.583333	0.166667	0.469388	0.0327869	0.0425532
solcap_snp_sl_35777	2	35.9619	0.270677	0.037037	0	0.04	0	0.131579	0.733333	0.168831	0.469388	0.0327869	0.0425532
SL10923_448	2	35.9706	0.266667	0.0555556	0	0.0416667	0.363636	0.243902	0.9375	0.166667	0.46	0.0327869	0.0851064
solcap_snp_sl_35776	2	35.9763	0.270677	0.037037	0	0.0384615	0	0.128205	0.615385	0.168831	0.469388	0.0327869	0.0425532
solcap_snp_sl_35774	2	35.9821	0.270677	0.037037	0	0.0384615	0	0.128205	0.615385	0.168831	0.469388	0.0327869	0.0425532
solcap_snp_sl_25427	2	35.9859	0.268657	0.0275229	0	0	0	0.102564	0.428571	0.168831	0.46	0.0163934	0.0416667
solcap_snp_sl_25422	2	35.9904	0.270677	0.0185185	0	0	0.363636	0.243902	0.666667	0.168831	0.469388	0.0163934	0.0212766
solcap_snp_sl_25421	2	35.9905	0.264706	0.00909091	0	0	0	0.102564	0.307692	0.164557	0.46	0.0163934	0
solcap_snp_sl_65977	2	35.9905	0.266667	0.00909091	0	0	0	0.102564	0.307692	0.166667	0.46	0.0163934	0
solcap_snp_sl_65976	2	36.0051	0.268657	0.0555556	0	0.0416667	0.363636	0.219512	0.9375	0.166667	0.469388	0.0327869	0.0851064
solcap_snp_sl_35771	2	36.0052	0.268657	0.00917431	0	0.0384615	0	0.102564	0.533333	0.166667	0.469388	0.0163934	0
solcap_snp_sl_65975	2	36.0054	0.270677	0.0181818	0	0.0384615	0	0.157895	0.714286	0.168831	0.469388	0.0163934	0.0204082
solcap_snp_sl_25420	2	36.0056	0.266667	0.00917431	0	0.037037	0	0.102564	0.571429	0.166667	0.46	0.0163934	0
solcap_snp_sl_25418	2	36.0095	0.268657	0.0458716	0	0.04	0	0.157895	0.857143	0.166667	0.469388	0.0327869	0.0625
solcap_snp_sl_15574	2	36.0095	0	0.283019	0.271186	0.230769	0	0.0232558	0	0	0	0.440678	0.0851064
solcap_snp_sl_25417	2	36.0095	0.268657	0.0458716	0	0.04	0	0.157895	0.857143	0.166667	0.469388	0.0327869	0.0625
solcap_snp_sl_25415	2	36.0123	0.270677	0.0275229	0	0	0	0.1	0.25	0.168831	0.469388	0.0163934	0.0416667
solcap_snp_sl_35770	2	36.0331	0.281481	0.0458716	0	0.04	0	0.216216	0.857143	0.179487	0.48	0.0327869	0.0625
SGN-U149575_TG14_snp657	2	36.0548	0.281481	0.0458716	0	0.04	0	0.15	0.769231	0.179487	0.48	0.0327869	0.0625
solcap_snp_sl_25414	2	36.0579	0.283582	0.0555556	0	0.0416667	0.2	0.205128	0.9375	0.179487	0.489796	0.0327869	0.0851064
solcap_snp_sl_35764	2	36.1033	0.283582	0.0458716	0	0.0416667	0	0.157895	0.866667	0.179487	0.489796	0.0327869	0.0625
CL015861-0082	2	36.1034	0	0	0	0	0	0	0	0	0	0	0
CL015861-0134	2	36.1034	0	0	0	0.037037	0	0	0	0	0	0	0
solcap_snp_sl_25409	2	36.1258	0.281481	0.0183486	0	0	0	0.025641	0.266667	0.192308	0.46	0.0327869	0
solcap_snp_sl_25408	2	36.126	0.281481	0.0183486	0	0	0	0.0512821	0.214286	0.192308	0.46	0.0327869	0
solcap_snp_sl_25406	2	36.1394	0.283582	0.037037	0	0.04	0	0.0512821	0.785714	0.192308	0.469388	0.0327869	0.0425532
solcap_snp_sl_25405	2	36.1713	0.283582	0.0366972	0	0.0416667	0.2	0.15	0.9375	0.192308	0.469388	0.0327869	0.0416667
solcap_snp_sl_25403	2	36.2037	0.283582	0.0277778	0	0.0416667	0.272727	0.128205	0.846154	0.192308	0.469388	0.0327869	0.0212766
solcap_snp_sl_25402	2	36.2039	0.283582	0.0181818	0	0.0384615	0	0.0243902	0.461538	0.192308	0.469388	0.0327869	0
solcap_snp_sl_25401	2	36.237	0.279412	0.0181818	0	0	0	0.0238095	0.1875	0.189873	0.46	0.0327869	0
solcap_snp_sl_35759	2	36.237	0.281481	0.0183486	0	0.0384615	0	0.075	0.571429	0.192308	0.46	0.0327869	0
solcap_snp_sl_35758	2	36.2373	0.283582	0.0181818	0	0.0384615	0	0.0243902	0.538462	0.192308	0.469388	0.0327869	0
SL10346_156	2	36.273	0.286765	0.0366972	0	0.0416667	0.272727	0.15	0.9375	0.189873	0.48	0.0327869	0.0416667
solcap_snp_sl_35757	2	36.282	0.283582	0.0183486	0	0.0384615	0	0.0238095	0.5	0.192308	0.469388	0.0327869	0
SGN-U574837_snp399	2	36.2841	0.286765	0.0366972	0	0.0416667	0.272727	0.15	0.9375	0.189873	0.48	0.0327869	0.0416667
solcap_snp_sl_35755	2	36.299	0.283582	0.00909091	0	0.0384615	0	0.025	0.538462	0.192308	0.469388	0.0163934	0
solcap_snp_sl_25398	2	36.309	0.283582	0.0272727	0	0.0416667	0	0.131579	0.857143	0.192308	0.469388	0.0327869	0.0204082
solcap_snp_sl_35754	2	36.3091	0.283582	0.0272727	0	0.0416667	0	0.131579	0.857143	0.192308	0.469388	0.0327869	0.0204082
solcap_snp_sl_35753	2	36.3094	0.283582	0.0272727	0	0.0416667	0	0.131579	0.857143	0.192308	0.469388	0.0327869	0.0204082
solcap_snp_sl_35752	2	36.3095	0.283582	0.00917431	0	0	0	0.025641	0.214286	0.192308	0.469388	0.0163934	0
SGN-U584790_snp107	2	36.3095	0.279412	0.0183486	0	0.04	0	0.0487805	0.785714	0.189873	0.46	0.0327869	0
solcap_snp_sl_49304	2	36.3655	0.281481	0.00909091	0	0	0	0.0238095	0.357143	0.192308	0.46	0.0163934	0
solcap_snp_sl_23849	2	36.3657	0.281481	0.00909091	0	0	0	0.0238095	0.357143	0.192308	0.46	0.0163934	0
solcap_snp_sl_29517	2	36.3785	0.272059	0.00909091	0	0	0	0.0232558	0.0625	0.177215	0.46	0.0163934	0
solcap_snp_sl_23850	2	36.4025	0.288889	0.349515	0.0491803	0.0833333	0.272727	0.190476	0.866667	0.189873	0.489796	0.474576	0.181818
solcap_snp_sl_13513	2	36.4038	0.281481	0.343137	0.0333333	0.0833333	0	0.146341	0.785714	0.189873	0.469388	0.474576	0.162791
solcap_snp_sl_13514	2	36.4047	0.294118	0.349515	0.0491803	0.166667	0.272727	0.560976	0.9375	0.189873	0.5	0.474576	0.181818
solcap_snp_sl_13515	2	36.4113	0.286765	0.343137	0.0491803	0.0384615	0	0.0232558	0.375	0.189873	0.48	0.482759	0.159091
solcap_snp_sl_13516	2	36.4114	0.286765	0.343137	0.0491803	0.04	0.181818	0.025	0.666667	0.189873	0.48	0.482759	0.159091
solcap_snp_sl_13517	2	36.4118	0.281481	0.33	0.0333333	0.0384615	0.181818	0.0243902	0.666667	0.189873	0.469388	0.473684	0.139535
solcap_snp_sl_13518	2	36.4119	0.281481	0.336634	0.0333333	0.04	0.181818	0.0238095	0.666667	0.189873	0.469388	0.482759	0.139535
solcap_snp_sl_13519	2	36.4119	0.286765	0.343137	0.0491803	0.0384615	0.181818	0.0243902	0.666667	0.189873	0.48	0.482759	0.159091
solcap_snp_sl_23851	2	36.4132	0.286765	0.336634	0.0491803	0.0384615	0.181818	0.0243902	0.666667	0.189873	0.48	0.473684	0.159091
solcap_snp_sl_13523	2	36.4226	0.291045	0.346535	0.05	0.0416667	0	0.025	0.642857	0.192308	0.489796	0.482759	0.162791
solcap_snp_sl_13526	2	36.4232	0.286765	0.346535	0.0333333	0.12	0.181818	0.05	0.933333	0.189873	0.48	0.482759	0.162791
solcap_snp_sl_13527	2	36.4234	0.291045	0.34	0.05	0.12	0.181818	0.05	0.933333	0.192308	0.489796	0.473684	0.162791
solcap_snp_sl_13528	2	36.4237	0.286765	0.346535	0.0491803	0.12	0.181818	0.025	0.785714	0.189873	0.48	0.482759	0.162791
solcap_snp_sl_13529	2	36.4239	0.291971	0.346535	0.0491803	0.115385	0.25	0.025	0.785714	0.2	0.48	0.482759	0.162791
solcap_snp_sl_13530	2	36.424	0.286765	0.34	0.0491803	0.12	0.181818	0.025	0.785714	0.189873	0.48	0.473684	0.162791
solcap_snp_sl_13531	2	36.4251	0.286765	0.354167	0.05	0.12	0.181818	0.0625	0.933333	0.189873	0.48	0.482143	0.175
solcap_snp_sl_13534	2	36.4268	0.288889	0.343137	0.0491803	0.0769231	0	0.0232558	0.25	0.189873	0.489796	0.482759	0.159091
solcap_snp_sl_29520	2	36.4322	0.286765	0.346535	0.0491803	0.125	0	0.15	0.692308	0.189873	0.48	0.473684	0.181818
solcap_snp_sl_13545	2	36.4421	0.281481	0.333333	0.0333333	0.12	0	0.102564	0.846154	0.189873	0.469388	0.473684	0.142857
solcap_snp_sl_29521	2	36.4422	0.286765	0.34	0.0491803	0.12	0	0.05	0.846154	0.189873	0.48	0.473684	0.162791
solcap_snp_sl_13546	2	36.4455	0.288889	0.34	0.05	0.12	0	0.05	0.846154	0.189873	0.489796	0.473684	0.162791
solcap_snp_sl_29522	2	36.4682	0.286765	0.288462	0.0491803	0.12	0	0.025	0.785714	0.189873	0.48	0.416667	0.113636
solcap_snp_sl_29523	2	36.4797	0.286765	0.281553	0.0491803	0.12	0	0.025	0.785714	0.189873	0.48	0.40678	0.113636
solcap_snp_sl_13549	2	36.491	0.286765	0.288462	0.0491803	0.115385	0	0.05	0.8	0.189873	0.48	0.416667	0.113636
solcap_snp_sl_13550	2	36.4911	0.286765	0.288462	0.0491803	0.12	0	0.05	0.8	0.189873	0.48	0.416667	0.113636
solcap_snp_sl_13552	2	36.4912	0.286765	0.288462	0.0491803	0.12	0	0.05	0.8	0.189873	0.48	0.416667	0.113636
solcap_snp_sl_23856	2	36.4914	0.288889	0.281553	0.0491803	0.12	0	0.05	0.785714	0.189873	0.489796	0.40678	0.113636
solcap_snp_sl_29524	2	36.4996	0.291045	0.295238	0.0491803	0.125	0	0.170732	0.785714	0.192308	0.489796	0.416667	0.133333
solcap_snp_sl_23857	2	36.5197	0.286765	0.288462	0.0491803	0.115385	0	0.0487805	0.733333	0.189873	0.48	0.416667	0.113636
solcap_snp_sl_13554	2	36.543	0.286765	0.285714	0.0491803	0.0384615	0	0.0487805	0.428571	0.189873	0.48	0.416667	0.111111
solcap_snp_sl_13555	2	36.5439	0.294118	0.307692	0.0491803	0.0833333	0.272727	0.195122	0.9375	0.189873	0.5	0.416667	0.159091
solcap_snp_sl_13556	2	36.5445	0.286765	0.278846	0.0491803	0.037037	0	0.0232558	0.25	0.189873	0.48	0.40678	0.111111
solcap_snp_sl_13557	2	36.5453	0.281481	0.278846	0.0333333	0.037037	0	0.0232558	0.25	0.189873	0.469388	0.416667	0.0909091
solcap_snp_sl_13558	2	36.5593	0.286765	0.295238	0.0819672	0.125	0	0.358974	0.846154	0.189873	0.48	0.40678	0.152174
solcap_snp_sl_13559	2	36.5722	0.294118	0.307692	0.0491803	0.0833333	0.333333	0.190476	0.8	0.189873	0.5	0.416667	0.159091
solcap_snp_sl_29526	2	36.5978	0.288889	0.300971	0.0333333	0.125	0.333333	0.121951	0.866667	0.189873	0.489796	0.40678	0.159091
Le013093s_150	2	36.645	0.279412	0.32381	0.0491803	0.125	0	0.0540541	0.909091	0.1875	0.469388	0.416667	0.2
solcap_snp_sl_29527	2	36.6909	0.281481	0.304762	0.0491803	0.0384615	0	0.025	0.571429	0.189873	0.469388	0.40678	0.173913
solcap_snp_sl_49311	2	36.691	0.283582	0.304762	0.0491803	0.0384615	0	0.025	0.571429	0.192308	0.469388	0.416667	0.155556
solcap_snp_sl_29528	2	36.697	0.281481	0.308411	0.0491803	0.0384615	0	0.0232558	0.125	0.189873	0.469388	0.416667	0.170213
solcap_snp_sl_13561	2	36.7165	0.286765	0.314286	0.0491803	0.0384615	0.333333	0.05	0.384615	0.189873	0.48	0.4	0.2
solcap_snp_sl_13566	2	36.7411	0.283582	0.304762	0.0491803	0.115385	0	0.0487805	0.6	0.194805	0.46	0.40678	0.173913
solcap_snp_sl_49312	2	36.7491	0.287879	0.304762	0.05	0.08	0	0.025	0.333333	0.197368	0.469388	0.40678	0.173913
solcap_snp_sl_13567	2	36.766	0.283582	0.314286	0.0327869	0.12	0	0.025641	0.733333	0.194805	0.46	0.423729	0.173913
solcap_snp_sl_29531	2	36.767	0.283582	0.327103	0.0327869	0.115385	0	0.0512821	0.733333	0.194805	0.46	0.433333	0.191489
SL10771_467	2	36.8046	0.283582	0.317757	0.0327869	0.08	0	0.025641	0.8	0.194805	0.46	0.416667	0.191489
solcap_snp_sl_13569	2	36.8186	0.283582	0.28972	0.0327869	0.0769231	0	0.0487805	0.714286	0.194805	0.46	0.366667	0.191489
solcap_snp_sl_13574	2	36.8287	0.293233	0.305556	0.0327869	0.0833333	0.333333	0.175	0.9375	0.194805	0.489796	0.366667	0.229167
solcap_snp_sl_23861	2	36.8427	0.283582	0.287037	0.0327869	0.0384615	0	0.0238095	0.3125	0.194805	0.46	0.366667	0.1875
solcap_snp_sl_13578	2	36.8483	0.283582	0.287037	0.0327869	0.0384615	0	0.0238095	0.3125	0.194805	0.46	0.366667	0.1875
solcap_snp_sl_13579	2	36.8483	0.283582	0.280374	0.0327869	0.04	0	0.0238095	0.3125	0.194805	0.46	0.355932	0.1875
solcap_snp_sl_13580	2	36.8484	0.285714	0.273585	0.0166667	0.0384615	0	0.0238095	0.3125	0.194805	0.469388	0.355932	0.170213
solcap_snp_sl_13581	2	36.8485	0.283582	0.273585	0.0166667	0.04	0	0.0238095	0.3125	0.194805	0.46	0.355932	0.170213
solcap_snp_sl_49318	2	36.8522	0.285714	0.247619	0.0333333	0.04	0	0.0232558	0.1875	0.194805	0.469388	0.333333	0.133333
solcap_snp_sl_13582	2	36.8717	0.293233	0.293578	0.0327869	0.0833333	0.333333	0.175	0.9375	0.194805	0.489796	0.344262	0.229167
solcap_snp_sl_13584	2	36.8817	0.283582	0.277778	0.0327869	0.08	0	0.05	0.714286	0.194805	0.46	0.344262	0.191489
solcap_snp_sl_13586	2	36.901	0.283582	0.257143	0.0166667	0.08	0	0.05	0.785714	0.194805	0.46	0.322034	0.173913
S_744	2	36.9152	0	0	0	0.037037	0	0.0238095	0.428571	0	0	0	0
S_427	2	36.9155	0.283582	0.277778	0.0327869	0.08	0	0.125	0.928571	0.194805	0.46	0.333333	0.208333
solcap_snp_sl_4573	2	36.9321	0.330827	0.842593	0.232143	0.0869565	0.166667	0.473684	0.9375	0.207792	0.571429	1	0.638298
solcap_snp_sl_13589	2	36.9322	0.283582	0.266055	0.0327869	0.037037	0	0.0232558	0.1875	0.194805	0.46	0.327869	0.1875
solcap_snp_sl_13590	2	36.9326	0.285714	0.284404	0.0327869	0.0833333	0.166667	0.125	0.9375	0.194805	0.469388	0.344262	0.208333
CL009035-0516	2	36.9598	0.283582	0.287037	0.0327869	0.0769231	0	0.05	0.8	0.194805	0.46	0.360656	0.191489
CL009035-0571	2	36.9599	0	0	0	0	0	0	0	0	0	0	0
solcap_snp_sl_13595	2	36.9624	0.285714	0.287037	0.0327869	0.08	0	0.05	0.8	0.194805	0.469388	0.360656	0.191489
solcap_snp_sl_13596	2	36.9626	0.283582	0.259615	0.0166667	0.08	0	0.05	0.8	0.194805	0.46	0.327586	0.173913
solcap_snp_sl_13597	2	36.9626	0.287879	0.280374	0.0327869	0.0769231	0	0.025641	0.733333	0.197368	0.469388	0.35	0.191489
solcap_snp_sl_13599	2	36.9636	0.283582	0.287037	0.0327869	0.0833333	0.166667	0.1	0.9375	0.194805	0.46	0.360656	0.191489
solcap_snp_sl_13600	2	36.9637	0.287879	0.287037	0.0333333	0.0833333	0.166667	0.1	0.9375	0.197368	0.469388	0.35	0.208333
solcap_snp_sl_13603	2	36.9723	0.285714	0.293578	0.0327869	0.0833333	0	0.1	0.928571	0.194805	0.469388	0.360656	0.208333
solcap_snp_sl_29538	2	36.9762	0.283582	0.277778	0.0327869	0.0769231	0	0.0243902	0.4	0.194805	0.46	0.35	0.1875
solcap_snp_sl_13604	2	36.9763	0.285714	0.287037	0.0327869	0.12	0	0.1	0.928571	0.194805	0.469388	0.35	0.208333
solcap_snp_sl_13605	2	36.9764	0.280303	0.287037	0.0333333	0.12	0	0.1	0.923077	0.194805	0.458333	0.360656	0.191489
solcap_snp_sl_13606	2	36.9854	0.283582	0.280374	0.0166667	0.0416667	0	0.0769231	0.615385	0.194805	0.46	0.35	0.191489
solcap_snp_sl_29540	2	36.9873	0.287879	0.287037	0.0333333	0.04	0	0.0238095	0.2	0.197368	0.469388	0.366667	0.1875
solcap_snp_sl_29541	2	36.9878	0.283582	0.293578	0.0327869	0.0833333	0.166667	0.1	0.9375	0.194805	0.46	0.360656	0.208333
solcap_snp_sl_49322	2	37.01	0.288889	0.277778	0.0327869	0.0769231	0	0.0243902	0.571429	0.194805	0.470588	0.35	0.1875
solcap_snp_sl_23863	2	37.0105	0.291045	0.284404	0.0327869	0.0769231	0	0.0243902	0.571429	0.194805	0.48	0.360656	0.1875
solcap_snp_sl_29543	2	37.0114	0.288889	0.287037	0.0327869	0.0769231	0	0.047619	0.583333	0.194805	0.470588	0.360656	0.191489
solcap_snp_sl_29545	2	37.0134	0.288889	0.287037	0.0166667	0.0833333	0	0.1	0.933333	0.194805	0.470588	0.360656	0.191489
solcap_snp_sl_29546	2	37.0135	0.293233	0.293578	0.0327869	0.0833333	0	0.1	0.933333	0.197368	0.48	0.360656	0.208333
solcap_snp_sl_4578	2	37.0382	0.313433	0.509259	0.160714	0	0	0.047619	0	0.194805	0.54	0.6	0.395833
solcap_snp_sl_13611	2	37.0431	0.0070922	0.302752	0.0327869	0.0384615	0	0.0232558	0.357143	0.0121951	0	0.377049	0.208333
solcap_snp_sl_13612	2	37.0433	0.0070922	0.305556	0.0327869	0.0833333	0	0.1	0.928571	0.0121951	0	0.377049	0.212766
solcap_snp_sl_13616	2	37.0436	0.0070922	0.299065	0.0166667	0.0833333	0	0.1	0.928571	0.0121951	0	0.366667	0.212766
solcap_snp_sl_13617	2	37.0438	0.0070922	0.305556	0.0333333	0.166667	0.0833333	0.230769	0.9375	0.0121951	0	0.377049	0.212766
solcap_snp_sl_13618	2	37.0438	0.0070922	0.305556	0.0327869	0.0833333	0	0.1	0.928571	0.0121951	0	0.377049	0.212766
solcap_snp_sl_13619	2	37.0439	0.0070922	0.302752	0.0327869	0.0384615	0	0.0232558	0.357143	0.0121951	0	0.377049	0.208333
solcap_snp_sl_29547	2	37.0445	0.00714286	0.301887	0.0327869	0.12	0	0.1	0.928571	0.0121951	0	0.372881	0.212766
solcap_snp_sl_13621	2	37.0565	0.0070922	0.305556	0.0327869	0.12	0	0.1	0.933333	0.0121951	0	0.377049	0.212766
solcap_snp_sl_13622	2	37.0566	0.0070922	0.305556	0.0327869	0.12	0	0.1	0.933333	0.0121951	0	0.377049	0.212766
solcap_snp_sl_13623	2	37.0568	0.00714286	0.305556	0.0333333	0.2	0.0833333	0.128205	0.9375	0.0121951	0	0.377049	0.212766
solcap_snp_sl_13625	2	37.0702	0.0070922	0.333333	0.0333333	0.0833333	0	0.097561	0.6875	0.0121951	0	0.433333	0.208333
solcap_snp_sl_13627	2	37.0716	0.0070922	0.33945	0.0327869	0.115385	0	0.075	0.571429	0.0121951	0	0.442623	0.208333
solcap_snp_sl_29548	2	37.0723	0.0070922	0.333333	0.0327869	0.08	0	0.075	0.538462	0.0121951	0	0.433333	0.208333
solcap_snp_sl_13630	2	37.0725	0.0070922	0.333333	0.0327869	0.037037	0	0.0232558	0.0625	0.0121951	0	0.433333	0.208333
solcap_snp_sl_13631	2	37.082	0.0070922	0.336449	0.0327869	0.0833333	0.166667	0.1	0.9375	0.0121951	0	0.433333	0.212766
solcap_snp_sl_29549	2	37.1157	0.0070922	0.333333	0.0327869	0.0833333	0	0.0512821	0.857143	0.0121951	0	0.442623	0.191489
solcap_snp_sl_13632	2	37.116	0.0070922	0.336449	0.0327869	0.0833333	0	0.0512821	0.857143	0.0121951	0	0.45	0.191489
solcap_snp_sl_13633	2	37.1161	0.0070922	0.330189	0.0327869	0.0833333	0	0.0512821	0.857143	0.0121951	0	0.440678	0.191489
solcap_snp_sl_13634	2	37.1162	0.0070922	0.327103	0.0327869	0.0833333	0	0.0512821	0.857143	0.0121951	0	0.433333	0.191489
solcap_snp_sl_13635	2	37.1363	0.0070922	0.314815	0.0327869	0.037037	0	0.0232558	0.0625	0.0121951	0	0.416667	0.1875
solcap_snp_sl_13636	2	37.1452	0.0070922	0.333333	0.0327869	0.12	0.166667	0.0512821	0.9375	0.0121951	0	0.442623	0.191489
solcap_snp_sl_13638	2	37.1635	0.0070922	0.324074	0.0327869	0.037037	0	0.0232558	0.0666667	0.0121951	0	0.433333	0.1875
solcap_snp_sl_49326	2	37.1635	0.0070922	0.324074	0.0327869	0.0384615	0.166667	0.0243902	0.642857	0.0121951	0	0.433333	0.1875
solcap_snp_sl_49327	2	37.172	0.0070922	0.0833333	0.0166667	0.04	0	0.025641	0.923077	0.0121951	0	0.0983607	0.0638298
solcap_snp_sl_29565	2	37.2472	0.0070922	0.0833333	0.0166667	0.0416667	0	0.05	0.933333	0.0121951	0	0.0983607	0.0638298
solcap_snp_sl_29567	2	37.2722	0.0070922	0.0740741	0.0327869	0	0	0.025	0.714286	0.0121951	0	0.0819672	0.0638298
241_2R_407	2	37.3748	0.29771	0.17757	0.827586	0.875	0.833333	0.717949	0.0625	0.25	0.346939	0	0.413043
241_2F_264_241_2b_60_b	2	37.3767	0.294574	0.169811	0.827586	0.875	0.833333	0.75	0.0666667	0.25	0.340426	0	0.4
solcap_snp_sl_29602	2	37.4609	0.0070922	0.0833333	0.0169492	0.0833333	0.25	0.128205	0.666667	0.0121951	0	0.0983607	0.0638298
SGN-U575873_snp121	2	37.5085	0.0070922	0.0642202	0.0327869	0.16	0.0833333	0.166667	0.769231	0.0121951	0	0.0983607	0.0208333
SGN-U313785_cLEF-41-C3_snp208	2	37.5092	0.0070922	0.0642202	0.0166667	0.166667	0.0833333	0.162162	0.866667	0.0121951	0	0.0983607	0.0208333
solcap_snp_sl_29627	2	37.5548	0.0070922	0.0642202	0.0166667	0.16	0	0.210526	0.769231	0.0121951	0	0.0983607	0.0208333
solcap_snp_sl_29658	2	37.6636	0.0070922	0.0825688	0.0163934	0.153846	0	0.0238095	0.3125	0.0121951	0	0.0983607	0.0625
CL009189-0414	2	37.7523	0.0141844	0.0740741	0.0166667	0.24	0.272727	0.157895	0.9375	0.0121951	0.0192308	0.0983607	0.0425532
SL10801_170	2	37.7525	0.0070922	0.0733945	0.0163934	0.0740741	0	0.0238095	0.307692	0.0121951	0	0.0983607	0.0416667
solcap_snp_sl_23882	2	37.7919	0.842105	0.0925926	0.224138	0.115385	0.25	0.047619	0	0.857143	0.843137	0.0163934	0.191489
CL016172-0092	2	37.8303	0	0	0	0	0	0	0	0	0	0	0
CL016172-0398_solcap_snp_sl_29710	2	37.8306	0.0070922	0.0275229	0	0.192308	0	0.131579	0.866667	0.0121951	0	0.0327869	0.0208333
solcap_snp_sl_29720	2	37.8588	0.0070922	0.0373832	0	0.166667	0	0.210526	0.866667	0.0121951	0	0.0338983	0.0416667
solcap_snp_sl_23883	2	37.9113	0.857143	0.101852	0.241379	0.24	0.2	0.268293	0.0625	0.87013	0.862745	0.0163934	0.212766
solcap_snp_sl_23884	2	38.0095	0.69697	0.0934579	0.183333	0.115385	0.2	0.0465116	0	0.675676	0.807692	0.0163934	0.195652
solcap_snp_sl_29749	2	38.0124	0.0070922	0.0272727	0	0.2	0	0.102564	0.857143	0.0121951	0	0.0327869	0.0204082
solcap_snp_sl_29766	2	38.0926	0.0070922	0.0366972	0	0.230769	0	0.0833333	0.857143	0.0121951	0	0.0327869	0.0416667
solcap_snp_sl_29779	2	38.1289	0.0070922	0.0363636	0	0.269231	0	0.157895	0.933333	0.0121951	0	0.0327869	0.0408163
CL016725-0417	2	38.137	0.0070922	0.0181818	0	0.153846	0	0.0238095	0.8	0.0121951	0	0.0327869	0
CL016725-0239	2	38.1372	0	0	0	0	0	0	0	0	0	0	0
solcap_snp_sl_29785	2	38.168	0.0070922	0.0272727	0	0.230769	0	0.15	0.933333	0.0121951	0	0.0327869	0.0204082
SGN-U585712_snp102623	2	38.217	0	0	0	0.0769231	0	0.05	0.142857	0	0	0	0
SGN-U585712_snp101557	2	38.218	0	0	0	0.0384615	0	0.0487805	0.133333	0	0	0	0
solcap_snp_sl_29789	2	38.2313	0.0070922	0.0183486	0	0.16	0	0.0731707	0.615385	0.0121951	0	0.0327869	0
SGN-U581277_snp815	2	38.264	0.0212766	0.0183486	0	0.230769	0	0.1	0.5	0.0243902	0.0192308	0.0327869	0
solcap_snp_sl_29814	2	38.4204	0.125	0.0183486	0	0.153846	0	0.0243902	0.642857	0.164557	0.0196078	0.0327869	0
solcap_snp_sl_29826	2	38.5341	0.125	0.0183486	0	0.185185	0	0.025	0.769231	0.164557	0.0196078	0.0327869	0
solcap_snp_sl_29840	2	38.6334	0.154472	0.0272727	0	0.28	0	0.179487	0.9375	0.197183	0.0434783	0.0327869	0.0204082
solcap_snp_sl_18397	2	38.8237	0.0882353	0.254717	0.637931	0.518519	0.8	0.560976	0	0.0987654	0.0625	0.2	0.326087
solcap_snp_sl_18398	2	38.8345	0.0882353	0.301887	0.696429	0.88	1	0.883721	1	0.0987654	0.0625	0.25	0.369565
solcap_snp_sl_18399	2	38.835	0.0875912	0.299065	0.719298	0.88	1	0.976744	1	0.0987654	0.0612245	0.25	0.361702
solcap_snp_sl_18400	2	38.8357	0.0882353	0.301887	0.709091	0.88	1	0.883721	1	0.0987654	0.0625	0.25	0.369565
solcap_snp_sl_49428	2	38.8368	0	0.0181818	0	0.153846	0	0	0.5	0	0	0.0327869	0
solcap_snp_sl_18401	2	38.8572	0.0882353	0.266667	0.636364	0.538462	0.875	0.536585	0	0.0987654	0.0625	0.216667	0.333333
CL017742-0462	2	38.8915	0	0.0272727	0.0333333	0.32	0.166667	0.25	0.9375	0	0	0.0327869	0.0204082
CL015542-0573	2	38.898	0	0.0272727	0	0.24	0	0.102564	0.933333	0	0	0.0327869	0.0204082
CL015292-0316	2	38.9264	0	0	0	0	0	0	0	0	0	0	0
solcap_snp_sl_49458	2	39.1449	0	0.0272727	0	0.2	0.166667	0.153846	0.933333	0	0	0.0327869	0.0204082
SGN-U582680_snp71245	2	39.1776	0	0	0	0.037037	0	0.0952381	0	0	0	0	0
solcap_snp_sl_18419	2	39.2753	0.0507246	0.811321	0.637931	0.68	0.444444	0.564103	0.785714	0.0365854	0.06	0.864407	0.744681
solcap_snp_sl_18420	2	39.2754	0.057554	0.811321	0.637931	0.68	0.4	0.564103	0.785714	0.0365854	0.0784314	0.864407	0.744681
solcap_snp_sl_49480	2	39.278	0	0.00917431	0	0.16	0	0	0.461538	0	0	0.0163934	0
solcap_snp_sl_18421	2	39.2834	0.0507246	0.785047	0.631579	0.37037	0.444444	0.55	0	0.0365854	0.06	0.830508	0.729167
solcap_snp_sl_49490	2	39.3096	0	0.0272727	0	0.291667	0.0909091	0.236842	0.9375	0	0	0.0327869	0.0204082
SGN-U313245_T0562_snp547	2	39.3261	0	0.0183486	0	0.28	0	0	0.785714	0	0	0.0327869	0
solcap_snp_sl_49497	2	39.3371	0	0.0183486	0	0.24	0	0.0243902	0.785714	0	0	0.0327869	0
solcap_snp_sl_49500	2	39.3391	0	0.0183486	0	0.24	0	0.0243902	0.785714	0	0	0.0327869	0
solcap_snp_sl_49505	2	39.3506	0	0.0183486	0	0.230769	0	0.0243902	0.785714	0	0	0.0327869	0
SGN-U574334_snp341_solcap_snp_sl_49507	2	39.3699	0	0.0183486	0	0.28	0	0.1	0.866667	0	0	0.0327869	0
solcap_snp_sl_49517	2	39.5245	0	0	0	0.0769231	0	0.0697674	0.0625	0	0	0	0
solcap_snp_sl_49535	2	39.6498	0	0.0272727	0	0.25	0	0.175	0.9375	0	0	0.0327869	0.0204082
CL017734-0752	2	39.7332	0	0.00909091	0	0	0	0	0	0	0	0.0163934	0
SGN-U315352_snp103	2	39.8089	0	0.0272727	0	0.230769	0.0833333	0.205128	0.75	0	0	0.0327869	0.0204082
CL017181-0258	2	39.8909	0	0.00909091	0	0	0	0	0	0	0	0.0163934	0
solcap_snp_sl_18441	2	39.8909	0.0567376	0.113208	0.172414	0.111111	0.272727	0.179487	0	0.0731707	0.0384615	0.0847458	0.148936
solcap_snp_sl_18443	2	39.892	0.05	0.122642	0.169492	0.111111	0.272727	0.179487	0	0.0617284	0.0384615	0.101695	0.148936
solcap_snp_sl_18444	2	39.8921	0.05	0.102804	0.169492	0.111111	0.166667	0.146341	0	0.0617284	0.0384615	0.0833333	0.12766
solcap_snp_sl_18445	2	39.8929	0.05	0.104762	0.155172	0.111111	0.2	0.175	0	0.0617284	0.0384615	0.0689655	0.148936
solcap_snp_sl_49576	2	39.8952	0.05	0.142857	0.169492	0.384615	0.181818	0.230769	0.9375	0.0617284	0.0384615	0.135593	0.152174
solcap_snp_sl_18447	2	39.9011	0.0567376	0.103774	0.169492	0.111111	0.181818	0.146341	0	0.0731707	0.0384615	0.0847458	0.12766
solcap_snp_sl_18448	2	39.9014	0.05	0.0943396	0.155172	0.111111	0.1	0.146341	0	0.0617284	0.0384615	0.0677966	0.12766
solcap_snp_sl_18449	2	39.9043	0.05	0.11215	0.169492	0.111111	0.181818	0.146341	0	0.0617284	0.0384615	0.1	0.12766
solcap_snp_sl_18450	2	39.9044	0.05	0.0943396	0.155172	0.111111	0.1	0.146341	0	0.0617284	0.0384615	0.0677966	0.12766
solcap_snp_sl_18451	2	39.9072	0.05	0.104762	0.155172	0.111111	0.1	0.175	0	0.0617284	0.0384615	0.0689655	0.148936
solcap_snp_sl_18452	2	39.9075	0.05	0.104762	0.140351	0.115385	0.1	0.175	0	0.0617284	0.0384615	0.0689655	0.148936
solcap_snp_sl_18453	2	39.9075	0.05	0.134615	0.125	0.333333	0.1	0.230769	0.9375	0.0617284	0.0384615	0.12069	0.152174
solcap_snp_sl_18455	2	39.908	0.05	0.104762	0.140351	0.111111	0.0909091	0.170732	0	0.0617284	0.0384615	0.0689655	0.148936
solcap_snp_sl_49579	2	39.9168	0	0.037037	0	0.269231	0	0.225	0.933333	0	0	0.05	0.0208333
SGN-U580456_snp788_solcap_snp_sl_49586	2	39.9844	0	0.00909091	0	0.0740741	0	0	0.125	0	0	0.0163934	0
SGN-U575324_snp56571	2	40.0167	0	0.0275229	0	0.208333	0	0	0.909091	0	0	0.0491803	0
SGN-U575324_snp57048	2	40.0172	0	0.0275229	0	0.269231	0	0.225	0.9375	0	0	0.0491803	0
SGN-U575324_snp58160	2	40.0183	0	0.00917431	0	0.153846	0	0.097561	0.375	0	0	0.0163934	0
SGN-U575324_snp58163	2	40.0183	0	0.00917431	0	0.153846	0	0.0952381	0.375	0	0	0.0163934	0
solcap_snp_sl_49606	2	40.0933	0.140741	0.895238	0.684211	0.36	1	0.435897	0	0.1375	0.145833	0.901639	0.886364
CL009173-0541	2	40.0963	0	0.0275229	0	0.28	0	0.230769	0.9375	0	0	0.0491803	0
DOT_468	2	40.1207	0	0.00909091	0	0.12	0	0	0.428571	0	0	0.0163934	0
solcap_snp_sl_49613	2	40.1246	0	0.0183486	0	0.269231	0	0.105263	0.857143	0	0	0.0327869	0
solcap_snp_sl_49645	2	40.2708	0	0.0366972	0	0.24	0	0.205128	0.9375	0	0	0.0491803	0.0208333
CL016050-0434	2	40.2925	0	0.0366972	0	0.230769	0.166667	0.27027	0.933333	0	0	0.0491803	0.0208333
SGN-U586140_snp1218_solcap_snp_sl_49661	2	40.3311	0	0.0183486	0	0.230769	0	0	0.6	0	0	0.0327869	0
solcap_snp_sl_49664	2	40.3324	0	0.0363636	0	0.222222	0	0.157895	0.933333	0	0	0.0327869	0.0408163
solcap_snp_sl_23909	2	40.3392	0.865672	0.0366972	0.22807	0.32	0.1	0.142857	0	0.8625	0.87234	0	0.0833333
solcap_snp_sl_49669	2	40.381	0	0.0275229	0	0.296296	0	0.128205	0.933333	0	0	0.0327869	0.0208333
CL015261-0333	2	40.4076	0	0.00909091	0	0	0	0	0	0	0	0	0.0204082
CL015261-0146	2	40.4078	0	0.0181818	0	0.222222	0	0	0.266667	0	0	0.0327869	0
solcap_snp_sl_49679	2	40.4224	0	0.0363636	0	0.296296	0	0.189189	0.9375	0	0	0.0327869	0.0408163
CL016002-0147	2	40.4565	0	0	0	0.037037	0	0	0	0	0	0	0
solcap_snp_sl_29869	2	40.4569	0	0	0	0.0384615	0.363636	0.121951	0	0	0	0	0
solcap_snp_sl_49726	2	40.5708	0	0.0363636	0	0.307692	0	0.162162	0.933333	0	0	0.0327869	0.0408163
CL015741-0547	2	40.6164	0	0.0275229	0	0.259259	0	0	0.75	0	0	0.0327869	0.0208333
CL015119-0265_solcap_snp_sl_49752	2	40.7551	0.0283688	0.0363636	0	0.384615	0	0.105263	0.769231	0.0487805	0	0.0327869	0.0408163
CL016571-0142	2	40.7809	0	0.00909091	0	0	0	0	0	0	0	0	0.0204082
solcap_snp_sl_49767	2	40.815	0.035461	0.0181818	0	0.208333	0	0	0.785714	0.0609756	0	0.0327869	0
solcap_snp_sl_49786	2	40.9558	0.0357143	0.0272727	0	0.2	0	0.1	0.666667	0.0487805	0.0196078	0.0327869	0.0204082
SGN-U584914_snp1830	2	41.0223	0.0425532	0.0363636	0	0.291667	0	0.153846	0.9375	0.0487805	0.0384615	0.0327869	0.0408163
CL015133-0476	2	41.0511	0	0.00909091	0	0.04	0	0	0.1875	0	0	0	0.0204082
solcap_snp_sl_49803	2	41.0568	0.0357143	0.0363636	0	0.217391	0	0.153846	0.933333	0.0487805	0.0196078	0.0327869	0.0408163
CL017414-0044	2	41.2156	0	0.00909091	0	0	0	0	0	0	0	0	0.0204082
CL017414-0128	2	41.2157	0.05	0.0183486	0	0.115385	0	0	0.375	0.0617284	0.0384615	0.0327869	0
solcap_snp_sl_29887	2	41.3057	0.0141844	0	0.0357143	0.0769231	0.0909091	0.0697674	0	0.0121951	0.0192308	0	0
solcap_snp_sl_29891	2	41.3418	0.0507246	0.037037	0.0925926	0.375	0.0909091	0.487179	0.9375	0.0625	0.0392157	0.0327869	0.0425532
solcap_snp_sl_23925	2	41.3456	0	0	0.0740741	0.185185	0.0909091	0.333333	0	0	0	0	0
SGN-U576591_snp67938	2	41.361	0.0437956	0.0363636	0	0.0869565	0	0.105263	0.866667	0.0625	0.02	0.0327869	0.0408163
SGN-U576591_snp65026	2	41.3639	0.057554	0.0272727	0	0.12	0	0.105263	0.866667	0.0740741	0.0392157	0.0327869	0.0204082
SGN-U586520_snp61264	2	41.3677	0.0496454	0.0183486	0	0.12	0	0.0263158	0.4	0.0609756	0.0384615	0.0327869	0
SGN-U586520_snp61163	2	41.3678	0.0434783	0.0363636	0	0.166667	0	0.105263	0.875	0.0617284	0.02	0.0327869	0.0408163
SGN-U586520_snp60358	2	41.3686	0.0434783	0.0272727	0	0.16	0	0.105263	0.875	0.0617284	0.02	0.0327869	0.0204082
CL016721-0530	2	41.3861	0	0.00909091	0	0	0	0	0	0	0	0	0.0204082
solcap_snp_sl_49909	2	41.4452	0.0357143	0.00909091	0	0.037037	0	0.047619	0.1875	0.0487805	0.0196078	0.0163934	0
CL015604-0460	2	41.4804	0	0.00909091	0	0	0	0	0	0	0	0	0.0204082
SGN-U581579_snp1167_solcap_snp_sl_49921	2	41.511	0.0428571	0.0181818	0	0.111111	0	0	0.125	0.0609756	0.0196078	0.0327869	0
solcap_snp_sl_49928	2	41.5485	0.0428571	0.0181818	0	0.0740741	0	0	0.125	0.0609756	0.0196078	0.0327869	0
SL10390_312	2	41.592	0.057971	0.0272727	0	0.2	0	0.282051	0.9375	0.0864198	0.02	0.0327869	0.0204082
CL000175-0403	2	41.5923	0.00719424	0.00909091	0	0.08	0	0.179487	0.571429	0.0123457	0	0	0.0204082
solcap_snp_sl_49964	2	41.7005	0.0362319	0.0181818	0	0.12	0	0.0731707	0.642857	0.0493827	0.02	0.0163934	0.0204082
solcap_snp_sl_49965	2	41.7014	0.0428571	0.0277778	0	0.130435	0	0.195122	0.571429	0.0609756	0.0196078	0.0327869	0.0212766
solcap_snp_sl_4829	2	41.726	0.00719424	0.833333	0.698113	0.333333	1	0.475	0	0	0	0.916667	0.729167
SGN-U589573_snp49325	2	41.7682	0.0434783	0.0366972	0	0.16	0	0.210526	0.9375	0.0617284	0.02	0.0327869	0.0416667
solcap_snp_sl_18519	2	41.7824	0.00719424	0.0925926	0.206897	0.208333	0.428571	0.317073	0	0.0123457	0	0.0666667	0.125
SGN-U576696_snp60390_solcap_snp_sl_49988	2	41.7962	0.0144928	0.0183486	0	0.12	0	0.153846	0.733333	0.025	0	0.0163934	0.0208333
solcap_snp_sl_4831	2	41.7962	0.0503597	0.842593	0.78	0.304348	1	0.365854	0	0.037037	0.0588235	0.933333	0.729167
SGN-U576696_snp60503_solcap_snp_sl_49989	2	41.7963	0.0144928	0.00925926	0	0.12	0	0.153846	0.733333	0.025	0	0.0163934	0
SGN-U576696_snp60922_solcap_snp_sl_49990	2	41.7967	0.0143885	0.00925926	0	0.12	0	0.153846	0.846154	0.0246914	0	0.0163934	0
SGN-U576696_snp63171	2	41.7989	0.0143885	0.00925926	0	0.12	0	0.153846	0.714286	0.0246914	0	0.0163934	0
solcap_snp_sl_49992	2	41.7991	0.0142857	0.0185185	0	0.125	0	0.153846	0.714286	0.0246914	0	0.0163934	0.0212766
SGN-U576696_snp63412	2	41.7992	0.0143885	0.0185185	0	0.125	0	0.153846	0.714286	0.0246914	0	0.0163934	0.0212766
solcap_snp_sl_49996	2	41.8293	0	0	0	0.037037	0	0	0.133333	0	0	0	0
solcap_snp_sl_50004	2	42.0619	0	0.00925926	0	0.115385	0	0	0.4	0	0	0.0163934	0
solcap_snp_sl_4842	2	42.0837	0.00714286	0.724771	0.45614	0.115385	0.454545	0	0	0	0	0.833333	0.591837
CL015008-0195	2	42.0985	0	0.0275229	0.0163934	0.115385	0	0.179487	0.9375	0	0	0.0163934	0.0416667
solcap_snp_sl_50012	2	42.1225	0	0.00925926	0.0163934	0.037037	0	0	0.0625	0	0	0.0163934	0
solcap_snp_sl_17161	2	42.1907	0.0666667	0.141509	0.230769	0.478261	0.555556	0.804878	0.9375	0.0886076	0.0408163	0.1	0.195652
solcap_snp_sl_42699	2	42.1908	0	0.00917431	0.0163934	0.0384615	0	0	0.125	0	0	0.0163934	0
CL017838-0265	2	42.2259	0	0.0275229	0.0163934	0.125	0	0.179487	0.933333	0	0	0.0163934	0.0416667
solcap_snp_sl_42692	2	42.2288	0	0.0275229	0	0	0	0.15	0.533333	0	0	0.0163934	0.0416667
SGN-U568929_snp230_solcap_snp_sl_42681	2	42.295	0	0.0275229	0.0163934	0.12	0	0.179487	0.866667	0	0	0.0163934	0.0416667
solcap_snp_sl_42678	2	42.3337	0	0.00917431	0.0163934	0.0769231	0	0.0243902	0.4375	0	0	0.0163934	0
SGN-U571023_snp534	2	42.4237	0	0.0185185	0	0.08	0	0	0.785714	0	0	0.0163934	0.0212766
solcap_snp_sl_42639	2	42.535	0	0.00917431	0.0163934	0.037037	0	0	0.3125	0	0	0.0163934	0
CL017245-0136	2	42.5729	0	0.0183486	0.0163934	0.0384615	0	0	0.214286	0	0	0.0163934	0.0208333
solcap_snp_sl_42625	2	42.632	0	0.0185185	0	0.12	0	0.0487805	0.714286	0	0	0.0163934	0.0212766
SGN-U320705_snp63	2	42.6513	0.00714286	0.0183486	0.0169492	0.08	0	0.025	0.75	0.0121951	0	0.0163934	0.0208333
SGN-U316197_C2_At4g36530_snp168	2	42.6731	0.00714286	0.00925926	0.0163934	0.0740741	0	0	0.733333	0.0121951	0	0.0163934	0
SGN-U568700_snp42664	2	42.7193	0	0.0185185	0.0163934	0.12	0	0.131579	0.9375	0	0	0.0163934	0.0212766
SGN-U568700_snp42655	2	42.7193	0	0.0185185	0	0.111111	0	0.131579	0.9375	0	0	0.0163934	0.0212766
SGN-U568700_snp42142	2	42.7198	0	0	0	0	0	0.1	0.125	0	0	0	0
CL016442-0175	2	42.739	0	0.00909091	0	0	0	0	0	0	0	0	0.0204082
CL015100-0473	2	42.9653	0.00714286	0.0275229	0.0166667	0.16	0	0.205128	0.9375	0.0121951	0	0.0163934	0.0416667
solcap_snp_sl_42537	2	42.9812	0	0.0185185	0	0.115385	0	0.128205	0.866667	0	0	0.0163934	0.0212766
solcap_snp_sl_42518	2	43.0688	0	0.00909091	0	0.0769231	0	0.157895	0.75	0	0	0	0.0204082
SGN-U602949_snp105683	2	43.1245	0.00719424	0.0275229	0	0.208333	0.3	0.205128	0.9375	0	0.0196078	0.0163934	0.0416667
CT232_snp229	2	43.2077	0.00719424	0.0185185	0.0163934	0.2	0.3	0.0731707	0.666667	0	0.0196078	0.0163934	0.0212766
SGN-U316347_T1535_snp219_solcap_snp_sl_42471	2	43.23	0	0.0183486	0	0.185185	0	0.047619	0.214286	0	0	0.0163934	0.0208333
solcap_snp_sl_17138	2	43.2692	0	0.00909091	0.0163934	0	0	0	0	0	0	0	0.0204082
solcap_snp_sl_42464	2	43.425	0.00724638	0.0185185	0	0.16	0.1	0.1	0.846154	0	0.0196078	0.0163934	0.0212766
solcap_snp_sl_42463	2	43.4448	0.00724638	0.0275229	0	0.208333	0.1	0.131579	0.928571	0	0.0196078	0.0163934	0.0416667
solcap_snp_sl_42458	2	43.4962	0.0142857	0.0275229	0.0163934	0.2	0	0.0810811	0.846154	0	0.0196078	0.0163934	0.0416667
SGN-U318040_U146494_snp347_solcap_snp_sl_42453	2	43.5266	0.0291971	0.0366972	0	0.166667	0	0.0540541	0.866667	0.0246914	0.04	0.0327869	0.0416667
CL016862-0447_solcap_snp_sl_42441	2	43.5746	0.0359712	0.0275229	0.0163934	0.185185	0	0.0810811	0.866667	0.0246914	0.0588235	0.0327869	0.0208333
CL016862-0381	2	43.5746	0	0.00909091	0	0	0	0	0	0	0	0	0.0204082
solcap_snp_sl_42411	2	43.7044	0.00714286	0.0366972	0.0163934	0.2	0	0.131579	0.9375	0	0.0196078	0.0327869	0.0416667
solcap_snp_sl_12841	2	43.8018	0.560606	0.841121	0.275862	0.192308	0.1	0	0	0.5	0.638298	0.866667	0.808511
solcap_snp_sl_42383	2	43.8355	0.0070922	0.0275229	0	0.111111	0	0.0512821	0.571429	0	0.0192308	0.0327869	0.0208333
solcap_snp_sl_42346	2	43.9781	0.0070922	0.037037	0.0163934	0.166667	0	0.166667	0.9375	0	0.0192308	0.0327869	0.0425532
solcap_snp_sl_42334	2	44.0183	0.0070922	0.0183486	0	0.08	0	0	0.333333	0	0.0192308	0.0327869	0
SGN-U579280_snp65613	2	44.0632	0	0.0185185	0	0.08	0	0.075	0.133333	0	0	0.0327869	0
SGN-U579280_snp65625	2	44.0632	0	0.0185185	0	0.08	0	0.075	0.133333	0	0	0.0327869	0
SGN-U590370_snp65805	2	44.0634	0	0.037037	0	0.12	0	0.102564	0.384615	0	0	0.0327869	0.0425532
SGN-U590370_snp65811	2	44.0634	0	0.0275229	0	0.115385	0	0.102564	0.384615	0	0	0.0327869	0.0208333
SGN-U590370_snp65846	2	44.0634	0	0.037037	0	0.125	0	0.102564	0.384615	0	0	0.0327869	0.0425532
SGN-U590370_snp65887	2	44.0634	0	0.037037	0	0.12	0	0.102564	0.384615	0	0	0.0327869	0.0425532
SGN-U579752_snp292_solcap_snp_sl_42324	2	44.0694	0.0070922	0.037037	0.0166667	0.208333	0	0.324324	0.9375	0	0.0192308	0.0327869	0.0425532
CL015021-0454	2	44.0729	0.0070922	0.037037	0	0.0869565	0	0.102564	0.384615	0	0.0192308	0.0327869	0.0425532
solcap_snp_sl_42301	2	44.2213	0.0070922	0.0183486	0.0163934	0.115385	0	0	0.428571	0	0.0192308	0.0327869	0
solcap_snp_sl_50166	2	44.3026	0.0070922	0.0280374	0	0.0869565	0	0.0243902	0.785714	0	0.0192308	0.0327869	0.0217391
CL015559-0344	2	44.3521	0.0070922	0.0280374	0.0163934	0.125	0	0.0243902	0.692308	0	0.0192308	0.0327869	0.0217391
solcap_snp_sl_29920	2	44.4333	0.0070922	0.0373832	0.0172414	0.25	0.111111	0.6	1	0	0.0192308	0.0327869	0.0434783
solcap_snp_sl_50126	2	44.5246	0.0070922	0.0272727	0	0.16	0	0.108108	0.866667	0	0.0192308	0.0327869	0.0204082
solcap_snp_sl_29918	2	44.6014	0	0	0.0163934	0.037037	0	0.190476	0	0	0	0	0
CL015139-0364	2	44.6094	0.00719424	0	0	0.0909091	0	0	0.333333	0	0.02	0	0
SGN-U572314_snp1007_solcap_snp_sl_29914	2	44.6544	0.0142857	0.037037	0.0327869	0.25	0	0.368421	0.9375	0	0.0392157	0.0327869	0.0425532
solcap_snp_sl_50066	2	44.7837	0.0142857	0.0183486	0.0163934	0.115385	0.3	0	0.785714	0	0.0392157	0.0327869	0
solcap_snp_sl_50060	2	44.8099	0.0142857	0.0366972	0	0.130435	0.3	0.135135	0.9375	0	0.0392157	0.0327869	0.0416667
solcap_snp_sl_50058	2	44.8137	0.0142857	0.0366972	0.0163934	0.166667	0.3	0.105263	0.9375	0	0.0392157	0.0327869	0.0416667
solcap_snp_sl_29911	2	44.8143	0	0	0	0	0	0.186047	0	0	0	0	0
solcap_snp_sl_50055	2	44.8383	0.0142857	0.0272727	0	0.153846	0.3	0.105263	0.692308	0	0.0392157	0.0327869	0.0204082
solcap_snp_sl_29905	2	45.023	0	0.00909091	0.0163934	0	0	0.0232558	0	0	0	0	0.0204082
CL009217-0844	2	45.0535	0	0.00917431	0	0	0	0	0	0	0	0	0.0208333
SL10924_758_CL009217-0735	2	45.0536	0	0.119266	0.118644	0.037037	0	0	0	0	0	0.05	0.204082
solcap_snp_sl_50024	2	45.0675	0.0212766	0.0183486	0.0163934	0.185185	0	0.0540541	0.642857	0	0.0576923	0.0327869	0
solcap_snp_sl_36297	2	45.1443	0.0142857	0.0458716	0.0677966	0.269231	0	0.394737	0.9375	0	0.0392157	0.0327869	0.0625
solcap_snp_sl_36294	2	45.2182	0	0.00909091	0.0163934	0.111111	0	0.119048	0.0625	0	0	0	0.0204082
solcap_snp_sl_67389	2	45.3108	0.00714286	0	0	0.0384615	0	0	0.2	0	0.0196078	0	0
solcap_snp_sl_67361	2	45.4883	0.0142857	0.00917431	0	0.16	0	0.0243902	0.642857	0	0.0392157	0.0163934	0
solcap_snp_sl_36287	2	45.5437	0.0142857	0.046729	0	0.2	0	0.285714	0.533333	0	0.0392157	0.05	0.0425532
SGN-U584284_snp3414	2	45.5821	0	0	0	0.037037	0	0.102564	0	0	0	0	0
solcap_snp_sl_10796	2	45.6725	0.0141844	0.17757	0.220339	0.04	0	0.0232558	0	0.0243902	0	0.224138	0.122449
solcap_snp_sl_67311	2	45.7099	0.0142857	0.0181818	0	0.115385	0	0	0.714286	0	0.0392157	0.0163934	0.0204082
SGN-U569505_snp29744	2	45.7503	0	0	0	0.037037	0	0.108108	0.2	0	0	0	0
solcap_snp_sl_36273	2	45.8935	0.0142857	0.0183486	0	0.269231	0	0.578947	1	0	0.0392157	0.0163934	0.0208333
solcap_snp_sl_36271	2	45.9439	0	0	0.0163934	0	0	0.0465116	0	0	0	0	0
solcap_snp_sl_67234	2	45.9464	0.0212766	0.00909091	0.0163934	0.0384615	0	0	0.133333	0	0.0576923	0.0163934	0
solcap_snp_sl_36265	2	45.9718	0	0	0.0163934	0.148148	0	0.175	0.125	0	0	0	0
solcap_snp_sl_36264	2	45.9917	0	0	0.0163934	0.185185	0.0833333	0.225	0.0625	0	0	0	0
solcap_snp_sl_67198	2	46.0863	0.00714286	0.00917431	0	0.0384615	0	0	0.375	0	0.0196078	0.0163934	0
solcap_snp_sl_67184	2	46.2047	0.00714286	0.0181818	0	0.0384615	0	0	0.125	0	0.0196078	0.0327869	0
solcap_snp_sl_67183	2	46.2057	0.00714286	0.0275229	0	0.0769231	0	0	0.785714	0	0.0196078	0.0327869	0.0208333
solcap_snp_sl_36259	2	46.2283	0	0	0.0327869	0.185185	0	0.238095	0.0625	0	0	0	0
solcap_snp_sl_36258	2	46.2759	0	0	0.0327869	0.0740741	0	0.162791	0.0625	0	0	0	0
solcap_snp_sl_67138	2	46.43	0	0.0363636	0	0.0740741	0	0.138889	0.692308	0	0	0.0327869	0.0408163
solcap_snp_sl_36253	2	46.4434	0	0	0.0491803	0.185185	0	0.243902	0.0625	0	0	0	0
solcap_snp_sl_67119	2	46.497	0	0.0183486	0	0.16	0	0.0833333	0.6	0	0	0.0327869	0
solcap_snp_sl_67117	2	46.4975	0	0.0272727	0	0.16	0	0.0833333	0.733333	0	0	0.0327869	0.0204082
solcap_snp_sl_36245	2	46.5194	0	0	0.0327869	0	0	0.0697674	0	0	0	0	0
solcap_snp_sl_36243	2	46.5255	0	0	0.0333333	0	0	0.0697674	0	0	0	0	0
solcap_snp_sl_10759	2	46.5692	0.00714286	0.181818	0.237288	0.153846	0.2	0.170732	0	0.0121951	0	0.147541	0.22449
CL017630-0504	2	46.5694	0	0.00909091	0	0	0	0	0	0	0	0	0.0204082
solcap_snp_sl_36241	2	46.5879	0	0.0183486	0.0169492	0.037037	0	0.166667	0	0	0	0.0166667	0.0204082
solcap_snp_sl_36238	2	46.6291	0	0	0	0.111111	0.0833333	0.162791	0	0	0	0	0
solcap_snp_sl_67090	2	46.6428	0	0.0183486	0	0.153846	0	0.0487805	0.357143	0	0	0.0327869	0
fw2.2_283_b	2	46.8302	0	0.0272727	0	0.148148	0.0833333	0.116279	0.133333	0	0	0.0327869	0.0204082
CL017715-0231	2	46.8554	0	0	0	0	0	0	0	0	0	0	0
CL017715-0287_solcap_snp_sl_67052	2	46.8555	0	0.0181818	0	0.153846	0	0.0789474	0.714286	0	0	0.0163934	0.0204082
solcap_snp_sl_36232	2	46.8566	0	0.0181818	0	0.333333	0.166667	0.5	1	0	0	0.0163934	0.0204082
solcap_snp_sl_36231	2	46.8803	0	0	0	0.0740741	0	0.166667	0.0625	0	0	0	0
ABA1_2029_solcap_snp_sl_67036	2	46.9479	0	0.0181818	0	0.115385	0	0.0833333	0.692308	0	0	0.0163934	0.0204082
ABA1_Promoter_SNP2_solcap_snp_sl_67034	2	46.9525	0	0.0181818	0	0.185185	0	0.166667	0.785714	0	0	0.0163934	0.0204082
solcap_snp_sl_67032	2	46.9531	0	0.0181818	0	0.115385	0	0.0833333	0.692308	0	0	0.0163934	0.0204082
ABA1_Promoter_SNP1	2	46.9532	0	0.0181818	0.0166667	0.333333	0.0833333	0.473684	1	0	0	0.0163934	0.0204082
solcap_snp_sl_36224	2	46.9949	0.0141844	0.103774	0.339623	0.478261	0.875	0.769231	1	0	0.0384615	0.0701754	0.142857
CL017806-0320_solcap_snp_sl_67017	2	47.0268	0	0.0181818	0	0.153846	0	0.0810811	0.769231	0	0	0.0163934	0.0204082
solcap_snp_sl_67010	2	47.0958	0	0.0181818	0	0.153846	0	0.108108	0.857143	0	0	0.0163934	0.0204082
solcap_snp_sl_36221	2	47.1969	0	0.00917431	0.0338983	0.269231	0.272727	0.421053	0.9375	0	0	0	0.0208333
solcap_snp_sl_36220	2	47.2917	0	0	0	0.037037	0	0.0697674	0	0	0	0	0
solcap_snp_sl_66965	2	47.3446	0	0	0	0.0769231	0	0	0.733333	0	0	0	0
solcap_snp_sl_66955	2	47.3617	0	0	0	0.153846	0	0.0769231	0.8125	0	0	0	0
solcap_snp_sl_66953	2	47.3648	0	0	0	0.153846	0	0.0769231	0.8125	0	0	0	0
solcap_snp_sl_66951	2	47.3661	0	0	0	0.148148	0	0.075	0.8	0	0	0	0
solcap_snp_sl_36203	2	47.4871	0	0	0	0	0	0.0232558	0	0	0	0	0
solcap_snp_sl_36202	2	47.6514	0	0.00917431	0.0350877	0.32	0.363636	0.410256	0.9375	0	0	0	0.0208333
solcap_snp_sl_36201	2	47.6527	0	0	0	0	0	0.0930233	0	0	0	0	0
solcap_snp_sl_66904	2	47.6832	0	0	0	0.12	0.181818	0.0526316	0.9375	0	0	0	0
solcap_snp_sl_66878	2	47.7869	0	0.00917431	0	0.153846	0.181818	0.0526316	0.9375	0	0	0	0.0208333
solcap_snp_sl_21867	2	47.9489	0.0431655	0.357798	0.35	0.423077	0.363636	0.447368	0.857143	0.0740741	0	0.377049	0.333333
solcap_snp_sl_21866	2	47.9501	0.0431655	0.361111	0.290909	0.518519	0.444444	0.473684	1	0.0740741	0	0.393443	0.319149
solcap_snp_sl_36193	2	47.9719	0.0428571	0.183908	0.211538	0.227273	0.222222	0.357143	0.466667	0.0731707	0	0.139535	0.227273
solcap_snp_sl_36192	2	47.9719	0.0425532	0.348624	0.25	0.333333	0.363636	0.380952	0.538462	0.0731707	0	0.393443	0.291667
solcap_snp_sl_21864	2	47.978	0.0431655	0.354545	0.333333	0.24	0.363636	0.384615	0.0666667	0.0740741	0	0.393443	0.306122
solcap_snp_sl_21862	2	47.9815	0.0431655	0.357798	0.333333	0.423077	0.363636	0.447368	1	0.0740741	0	0.393443	0.3125
solcap_snp_sl_36189	2	47.9964	0	0	0.0491803	0.307692	0.2	0.307692	1	0	0	0	0
solcap_snp_sl_36188	2	48.0287	0	0.00917431	0.0655738	0.384615	0.2	0.35	1	0	0	0	0.0208333
CL016371-0420	2	48.1769	0	0	0	0	0	0	0	0	0	0	0
solcap_snp_sl_67596	2	48.2051	0	0	0	0.111111	0	0	0.266667	0	0	0	0
SGN-U315914_C2_At5g67370_snp371	2	48.2728	0	0	0	0	0	0	0	0	0	0	0
solcap_snp_sl_21971	2	48.3053	0.0567376	0.474747	0.637931	0.681818	0.777778	0.9	1	0.0853659	0.0192308	0.482143	0.465116
solcap_snp_sl_21966	2	48.3708	0.0496454	0.0740741	0.471698	0.590909	0.666667	0.738095	1	0.0731707	0.0192308	0.0327869	0.12766
solcap_snp_sl_67551	2	48.3952	0	0.00917431	0	0.173913	0.2	0.15	0.9375	0	0	0.0163934	0
solcap_snp_sl_58490	2	48.444	0	0.00917431	0	0.173913	0.2	0.179487	0.9375	0	0	0.0163934	0
solcap_snp_sl_20064	2	48.4548	0.0425532	0.0366972	0.0847458	0	0.0833333	0	0	0.0731707	0	0.0163934	0.0625
solcap_snp_sl_20063	2	48.4551	0.0425532	0.0555556	0.166667	0.454545	0.6	0.675	1	0.0731707	0	0.0327869	0.0851064
solcap_snp_sl_32404	2	48.5121	0	0	0	0	0	0.0930233	0	0	0	0	0
solcap_snp_sl_58462	2	48.5474	0	0	0	0.111111	0	0.0731707	0.733333	0	0	0	0
solcap_snp_sl_58447	2	48.6022	0.511811	0.471154	0.673913	0.347826	0.25	0.121951	0	0.554054	0.434783	0.448276	0.5
solcap_snp_sl_20052	2	48.685	0.155556	0.509434	0.313725	0.44	0.2	0.394737	0.9375	0.202532	0.0408163	0.533333	0.478261
CL017436-0294	2	48.6872	0.15942	0.504673	0.321429	0.153846	0	0.142857	0	0.197531	0.06	0.52459	0.478261
CL017436-0232	2	48.6873	0	0.00909091	0	0.0384615	0	0	0	0	0	0.0163934	0
solcap_snp_sl_20051	2	48.6965	0.155556	0.495238	0.28	0.166667	0	0.142857	0	0.202532	0.0408163	0.516667	0.466667
solcap_snp_sl_20049	2	48.6972	0.155556	0.518868	0.45098	0.666667	0.75	0.902439	1	0.202532	0.0408163	0.533333	0.5
solcap_snp_sl_58414	2	48.7283	0	0.00917431	0	0.217391	0.1	0.15	0.8	0	0	0.0163934	0
CL016576-0377	2	48.7319	0	0	0	0	0	0	0	0	0	0	0
solcap_snp_sl_58389	2	48.8326	0	0	0	0	0	0	0.0625	0	0	0	0
solcap_snp_sl_20044	2	48.8789	0.155556	0.518868	0.431373	0.565217	0.75	0.804878	0.9375	0.202532	0.0408163	0.533333	0.5
solcap_snp_sl_32389	2	48.9434	0	0.0183486	0.0727273	0.409091	0.777778	0.578947	1	0	0	0.0163934	0.0208333
CL016196-0121	2	49.0019	0	0.00917431	0	0.28	0.363636	0.15	0.9375	0	0	0.0163934	0
SGN-U313919_snp500	2	49.0156	0	0.00917431	0	0.28	0.363636	0.15	0.9375	0	0	0.0163934	0
solcap_snp_sl_48037	2	49.047	0	0.00917431	0	0.08	0.0833333	0.0487805	0.571429	0	0	0.0163934	0
solcap_snp_sl_29357	2	49.0895	0	0	0.0333333	0	0	0.0232558	0	0	0	0	0
solcap_snp_sl_48033	2	49.0924	0	0.00917431	0	0.125	0.363636	0.15	0.9375	0	0	0.0163934	0
solcap_snp_sl_29351	2	49.2413	0.0212766	0.0550459	0.172414	0.208333	0.5	0.459459	1	0.0121951	0.0384615	0.0491803	0.0625
solcap_snp_sl_47977	2	49.336	0	0.00917431	0	0.0833333	0.2	0.131579	0.9375	0	0	0.0163934	0
CL016534-0109	2	49.4235	0	0.00909091	0	0.0384615	0	0	0	0	0	0.0163934	0
solcap_snp_sl_29349	2	49.4516	0	0	0.0166667	0.08	0	0.205128	0.142857	0	0	0	0
solcap_snp_sl_47942	2	49.4524	0	0.00917431	0	0.12	0.181818	0.128205	0.9375	0	0	0.0163934	0
CL017391-0390	2	49.5633	0	0.00917431	0	0.04	0	0.0789474	0.857143	0	0	0.0163934	0
solcap_snp_sl_47897	2	49.6113	0	0.00917431	0	0.12	0.181818	0.128205	0.9375	0	0	0.0163934	0
solcap_snp_sl_47885	2	49.755	0	0	0	0	0	0.0243902	0.642857	0	0	0	0
solcap_snp_sl_47880	2	49.8162	0	0.00917431	0	0.04	0	0.0243902	0.642857	0	0	0.0163934	0
solcap_snp_sl_63048	3	0.071076	0.107143	0.037037	0	0.2	0.272727	0.097561	0.933333	0.123457	0.0384615	0.0166667	0.0625
CL016802-0675	3	0.119273	0.107143	0.00925926	0	0.153846	0	0.0487805	0.8	0.123457	0.0384615	0	0.0208333
solcap_snp_sl_63084	3	0.183363	0	0	0	0.111111	0	0	0.2	0	0	0	0
solcap_snp_sl_25015	3	0.304164	0.149254	0	0	0	0	0	0	0.1125	0.234043	0	0
CL017202-0450_solcap_snp_sl_63109	3	0.304215	0.1	0.00925926	0	0.16	0	0.05	0.8	0.111111	0.0384615	0	0.0208333
CL017080-0343	3	0.305385	0	0.0272727	0	0	0	0	0	0	0	0.0163934	0.0408163
CL017080-0223	3	0.305505	0.1	0.00925926	0	0.192308	0	0.05	0.8125	0.111111	0.0384615	0	0.0208333
solcap_snp_sl_63114	3	0.334009	0.0935252	0.037037	0	0.166667	0	0.05	0.8	0.1	0.0384615	0.0166667	0.0625
CL016925-0828	3	0.346009	0.1	0.00925926	0	0.192308	0	0.0232558	0.4	0.111111	0.0384615	0	0.0208333
solcap_snp_sl_63129	3	0.473207	0.0797101	0.00925926	0	0.115385	0	0	0.25	0.0759494	0.0384615	0	0.0208333
solcap_snp_sl_63134	3	0.473756	0.0797101	0.00925926	0	0.115385	0	0	0.25	0.0759494	0.0384615	0	0.0208333
solcap_snp_sl_34398	3	0.508484	0.0070922	0.0183486	0.0491803	0.0740741	0	0.214286	0	0	0.0192308	0	0.0416667
solcap_snp_sl_63167	3	0.631452	0.0857143	0.0185185	0	0.115385	0	0.0243902	0.666667	0.0864198	0.0384615	0	0.0416667
solcap_snp_sl_63184	3	0.748576	0	0.0185185	0	0.16	0.272727	0.162162	0.9375	0	0	0.0166667	0.0208333
solcap_snp_sl_9663	3	0.828684	0.377778	0.105769	0.222222	0.545455	0.5	0.846154	1	0.265823	0.530612	0.0508475	0.177778
solcap_snp_sl_63211	3	0.944995	0	0.00917431	0	0.115385	0.0833333	0	0.466667	0	0	0.0163934	0
solcap_snp_sl_21215	3	1.03447	0.0212766	0.0754717	0.210526	0.538462	0.625	0.675	1	0	0.0384615	0.05	0.108696
solcap_snp_sl_9666	3	1.04569	0.0212766	0.0666667	0.166667	0.4	0.125	0.538462	0.714286	0	0.0384615	0.05	0.0888889
solcap_snp_sl_9667	3	1.0459	0.0212766	0.0666667	0.166667	0.36	0.125	0.538462	0.714286	0	0.0384615	0.05	0.0888889
solcap_snp_sl_21216	3	1.05689	0.0212766	0.0666667	0.166667	0.52	0.571429	0.675	1	0	0.0384615	0.05	0.0888889
solcap_snp_sl_63240	3	1.14434	0	0.0275229	0	0.173913	0	0.1	0.875	0	0	0.0163934	0.0416667
solcap_snp_sl_9681	3	1.25756	0.151079	0.201923	0.314815	0.423077	0	0.410256	0.866667	0.1625	0.0576923	0.192982	0.212766
solcap_snp_sl_63273	3	1.32308	0	0	0	0.111111	0.0833333	0.025	0.6875	0	0	0	0
solcap_snp_sl_63285	3	1.38317	0	0	0	0.037037	0	0	0.428571	0	0	0	0
solcap_snp_sl_63290	3	1.39029	0	0.0275229	0	0.08	0.3	0.05	0.933333	0	0	0.0163934	0.0416667
solcap_snp_sl_63301	3	1.5293	0	0.00917431	0	0	0	0	0.5	0	0	0.0163934	0
CL016787-0272_solcap_snp_sl_63305	3	1.55432	0	0.0272727	0	0.153846	0.272727	0.15	0.9375	0	0	0	0.0612245
solcap_snp_sl_9683	3	1.58411	0.266667	0.0642202	0.298246	0.28	0.375	0.414634	0.266667	0.164557	0.44898	0	0.145833
solcap_snp_sl_63307	3	1.63195	0	0	0	0	0	0	0.75	0	0	0	0
SGN-U569291_snp1086	3	1.70429	0	0.0363636	0	0.08	0.272727	0.119048	0.666667	0	0	0.0163934	0.0612245
solcap_snp_sl_63356	3	1.87703	0	0.0272727	0	0.12	0.272727	0.128205	0.9375	0	0	0.0163934	0.0408163
CL017347-0198	3	1.89116	0	0.00909091	0	0	0	0	0	0	0	0.0163934	0
CL017347-0326_solcap_snp_sl_63360	3	1.89129	0	0	0	0.037037	0	0	0.428571	0	0	0	0
solcap_snp_sl_63377	3	1.9681	0	0	0	0	0	0	0.133333	0	0	0	0
solcap_snp_sl_9689	3	2.05301	0.148936	0.103774	0.473684	0.481481	0.888889	0.8	0.733333	0.0853659	0.25	0.0833333	0.130435
SL10790_382	3	2.05349	0.148936	0.037037	0.473684	0.384615	0.5	0.75	0.0625	0.0853659	0.25	0	0.0833333
solcap_snp_sl_15320	3	2.07258	0.148936	0.046729	0.45614	0.384615	0.454545	0.75	0.2	0.0853659	0.25	0	0.102041
solcap_snp_sl_9690	3	2.07309	0.148936	0.105769	0.5	0.52	0.888889	0.904762	1	0.0853659	0.25	0.0517241	0.173913
solcap_snp_sl_63391	3	2.0737	0.148936	0.0188679	0.340426	0.333333	0.454545	0.6875	0.0625	0.0853659	0.25	0	0.0434783
solcap_snp_sl_63402	3	2.11183	0	0.0272727	0	0.0416667	0	0.097561	0.8	0	0	0.0163934	0.0408163
CL017009-0461	3	2.14754	0	0.0363636	0	0.115385	0	0.125	0.857143	0	0	0.0327869	0.0408163
solcap_snp_sl_63452	3	2.36371	0	0	0	0	0	0	0.733333	0	0	0	0
solcap_snp_sl_9703	3	2.37214	0.459259	0.336449	0.563636	0.375	0.5	0.119048	0	0.303797	0.693878	0.25	0.446809
Ohase2_Promoter_SNP	3	2.44812	0	0	0	0	0	0	0.0625	0	0	0	0
solcap_snp_sl_63466	3	2.47232	0	0	0	0.0384615	0	0	0.266667	0	0	0	0
solcap_snp_sl_28569	3	2.50006	0.0070922	0.0183486	0	0.0769231	0.2	0.243902	0.9375	0.0121951	0	0.0327869	0
SGN-U571958_snp135	3	2.50012	0	0	0	0.0384615	0.0833333	0.225	0.0625	0	0	0	0
solcap_snp_sl_28572	3	3.32718	0.0070922	0.00925926	0	0.04	0.2	0.243902	0.9375	0.0121951	0	0.0166667	0
solcap_snp_sl_17581	3	3.32737	0	0.00934579	0.206897	0.0384615	0.1	0.0697674	0	0	0	0	0.0208333
solcap_snp_sl_28574	3	3.97129	0.0070922	0.0183486	0	0.0769231	0.2	0.243902	0.9375	0.0121951	0	0.0327869	0
solcap_snp_sl_28577	3	4.06934	0.0070922	0	0	0.0416667	0.222222	0.243902	0.9375	0.0121951	0	0	0
solcap_snp_sl_28580	3	5.67111	0.0070922	0	0	0.04	0.333333	0.243902	0.9375	0.0121951	0	0	0
solcap_snp_sl_19643	3	6.61272	0.537879	0.283019	0.309091	0.4	0.666667	0.725	1	0.43038	0.723404	0.101695	0.510638
solcap_snp_sl_55754	3	6.65935	0	0.0183486	0	0.08	0	0.230769	1	0	0	0.0327869	0
solcap_snp_sl_19652	3	6.72822	0.133333	0.00917431	0.0847458	0.0740741	0	0.121951	0	0.0617284	0.276596	0	0.0208333
solcap_snp_sl_24347	3	6.73618	0.133333	0.00917431	0.0847458	0.0740741	0	0.121951	0	0.0617284	0.276596	0	0.0208333
solcap_snp_sl_19654	3	6.76265	0.133333	0.0275229	0.0862069	0.153846	0	0.309524	0.933333	0.0617284	0.276596	0.0327869	0.0208333
SL10445_1141	3	6.80401	0.133333	0.00909091	0.0333333	0.0740741	0	0.097561	0	0.0617284	0.276596	0	0.0204082
solcap_snp_sl_19657	3	6.8067	0.132353	0.0275229	0.0338983	0.153846	0	0.292683	0.9375	0.0609756	0.276596	0.0327869	0.0208333
solcap_snp_sl_55790	3	6.80844	0	0.0181818	0	0.0740741	0	0.0243902	0.571429	0	0	0.0327869	0
solcap_snp_sl_19658	3	6.8191	0.132353	0.00909091	0.0333333	0.0740741	0	0.097561	0	0.0609756	0.276596	0	0.0204082
solcap_snp_sl_19659	3	6.8191	0.129496	0.00909091	0.0333333	0.0740741	0	0.097561	0	0.0609756	0.26	0	0.0204082
solcap_snp_sl_19660	3	6.87947	0.132353	0.00909091	0.0333333	0.0740741	0	0.097561	0	0.0609756	0.276596	0	0.0204082
solcap_snp_sl_55812	3	6.88758	0	0	0	0	0	0.1	0.714286	0	0	0	0
solcap_snp_sl_19661	3	6.90334	0.428571	0.192661	0.614035	0.576923	1	0.666667	0	0.333333	0.5625	0.0327869	0.395833
solcap_snp_sl_55125	3	6.97949	0	0	0	0.0384615	0	0.0243902	0.5	0	0	0	0
CL015582-0113	3	7.00763	0	0.0181818	0	0.0384615	0	0	0	0	0	0.0327869	0
solcap_snp_sl_14355	3	7.08513	0	0.25	0.0169492	0.230769	0.1	0.263158	1	0	0	0.333333	0.145833
solcap_snp_sl_14354	3	7.09557	0	0.222222	0.0169492	0.230769	0.1	0.263158	1	0	0	0.333333	0.0833333
solcap_snp_sl_14353	3	7.09586	0	0.222222	0.0169492	0.230769	0.1	0.263158	1	0	0	0.333333	0.0833333
solcap_snp_sl_55107	3	7.11524	0	0.0275229	0	0.153846	0.125	0.225	0.9375	0	0	0.0327869	0.0208333
CL015436-0159	3	7.11568	0	0.00917431	0	0.04	0.0909091	0.097561	0.214286	0	0	0	0.0208333
CL015436-0072	3	7.11577	0	0.00909091	0	0.0384615	0	0	0	0	0	0.0163934	0
solcap_snp_sl_55088	3	7.19616	0	0.0181818	0	0.0384615	0	0.146341	0.666667	0	0	0.0327869	0
solcap_snp_sl_55072	3	7.2319	0	0.0181818	0	0.0384615	0	0	0.375	0	0	0.0327869	0
solcap_snp_sl_55055	3	7.29371	0	0.0181818	0	0.115385	0	0.15	0.9375	0	0	0.0327869	0
solcap_snp_sl_55037	3	7.34138	0	0.0925926	0.0338983	0.481481	0.5	0.829268	1	0	0	0.114754	0.0638298
solcap_snp_sl_55026	3	7.41582	0	0.0181818	0	0.037037	0	0.0238095	0.5	0	0	0.0327869	0
SGN-U572737_snp86	3	7.47644	0	0.0462963	0.0169492	0.2	0.5	0.552632	0	0	0	0.0491803	0.0425532
SGN-U564013_snp1820_solcap_snp_sl_55020	3	7.51844	0	0.0925926	0.0169492	0.32	0.583333	0.785714	1	0	0	0.114754	0.0638298
solcap_snp_sl_55002	3	7.60432	0	0.0454545	0.0163934	0.16	0	0.2	0.8125	0	0	0.0655738	0.0204082
SGN-U567178_snp438_solcap_snp_sl_31828	3	7.71479	0.0141844	0.0181818	0	0.173913	0.0833333	0.275	1	0.0121951	0.0192308	0.0327869	0
solcap_snp_sl_31826	3	7.71739	0.0141844	0.0181818	0	0.2	0.0833333	0.282051	0.8125	0.0121951	0.0192308	0.0327869	0
solcap_snp_sl_31822	3	7.72435	0.0141844	0	0	0.0769231	0.0833333	0.142857	0.0666667	0.0121951	0.0192308	0	0
solcap_snp_sl_54950	3	7.89031	0	0.00909091	0	0.08	0	0.0465116	0.4	0	0	0.0163934	0
solcap_snp_sl_31819	3	7.9111	0.0070922	0.0462963	0	0.230769	0.222222	0.5	0.0625	0.0121951	0	0.0491803	0.0425532
solcap_snp_sl_19514	3	7.92106	0.110294	0.245283	0.315789	0.375	0.7	0.7	0.1875	0.141026	0.0392157	0.166667	0.347826
solcap_snp_sl_19513	3	7.92107	0	0.037037	0.0588235	0.1	0.142857	0.0967742	0	0	0	0.0909091	0
solcap_snp_sl_19511	3	7.92131	0.106383	0.219048	0.277778	0.347826	0.545455	0.625	0.133333	0.134146	0.0384615	0.137931	0.319149
solcap_snp_sl_31817	3	7.92846	0.110294	0.214953	0.350877	0.52	0.4	0.74359	0.866667	0.141026	0.0392157	0.133333	0.319149
solcap_snp_sl_19509	3	7.92881	0.110294	0.2	0.351852	0.454545	0.444444	0.74359	0.933333	0.141026	0.0392157	0.118644	0.304348
solcap_snp_sl_19508	3	7.98807	0.109489	0.261682	0.283333	0.269231	0.555556	0.243243	0.9375	0.139241	0.0392157	0.183333	0.361702
solcap_snp_sl_19504	3	8.05661	0.0070922	0.0185185	0.288136	0.384615	0.4	0.725	0.0625	0.0121951	0	0	0.0425532
solcap_snp_sl_6790	3	8.11357	0.421053	0.102804	0.196429	0.208333	0.4	0.45	0	0.291139	0.595745	0.1	0.106383
solcap_snp_sl_54887	3	8.18575	0	0.0550459	0	0.111111	0.222222	0.170732	0.6875	0	0	0.0655738	0.0416667
CL016675-0084	3	8.26631	0.0285714	0.00917431	0	0	0	0	0	0.0493827	0	0	0.0208333
CL016675-0242	3	8.26647	0	0.00909091	0	0.0384615	0	0.097561	0.375	0	0	0.0163934	0
solcap_snp_sl_41324	3	8.28389	0	0.0550459	0	0.0769231	0.222222	0.170732	0.916667	0	0	0.0655738	0.0416667
solcap_snp_sl_27094	3	8.29125	0.0070922	0.00909091	0	0.0769231	0	0.190476	0.0625	0.0121951	0	0	0.0204082
solcap_snp_sl_1599	3	8.30833	0.432836	0.179245	0.482759	0.625	1	0.928571	1	0.303797	0.604167	0.163934	0.2
solcap_snp_sl_41353	3	8.42522	0	0.0458716	0	0.0384615	0.2	0.1	0.6	0	0	0.0491803	0.0416667
SGN-U585791_snp124_solcap_snp_sl_41379	3	8.55788	0	0.00909091	0	0.04	0.181818	0.195122	0.733333	0	0	0.0163934	0
solcap_snp_sl_27099	3	8.57106	0.0070922	0.00909091	0	0.0769231	0	0.0930233	0	0.0121951	0	0	0.0204082
PSY1_Promoter_SNP1	3	8.60383	0	0	0	0	0.181818	0.0232558	0.466667	0	0	0	0
SGN-U314429_snp100	3	8.60538	0	0.00909091	0	0.111111	0.181818	0.0731707	0.3125	0	0	0.0163934	0
solcap_snp_sl_41384	3	8.60612	0	0	0	0	0	0	0.125	0	0	0	0
Psy1_250_b	3	8.60739	0	0	0	0	0	0.0731707	0.1875	0	0	0	0
solcap_snp_sl_41389	3	8.61029	0	0	0.0163934	0.0769231	0.272727	0.195122	0.9375	0	0	0	0
solcap_snp_sl_23192	3	8.66387	0.356061	0.186916	0.694915	0.75	0.818182	1	1	0.269231	0.531915	0.0655738	0.347826
solcap_snp_sl_27106	3	8.68792	0.0070922	0.00909091	0.0327869	0.0769231	0	0.142857	0.0625	0.0121951	0	0	0.0204082
solcap_snp_sl_23193	3	8.70814	0.569231	0.669811	0.339623	0.28	0.2	0.075	0.214286	0.649351	0.478261	0.810345	0.5
solcap_snp_sl_27113	3	8.78146	0.0070922	0.00909091	0	0.0416667	0	0.146341	0.9375	0.0121951	0	0.0163934	0
solcap_snp_sl_23195	3	8.841	0.174242	0.682243	0.267857	0.192308	0.272727	0	0	0.197368	0.102041	0.813559	0.520833
solcap_snp_sl_23196	3	8.90422	0.172932	0.59434	0.350877	0.44	0.818182	0.538462	0.9375	0.207792	0.0816327	0.672414	0.5
solcap_snp_sl_12718	3	8.90465	0.159091	0.603774	0.333333	0.44	0.727273	0.341463	0	0.184211	0.0816327	0.689655	0.5
solcap_snp_sl_27130	3	8.92705	0.0070922	0.00909091	0	0.04	0	0.146341	0.9375	0.0121951	0	0.0163934	0
Le004314_168_solcap_snp_sl_27137	3	8.94172	0.0070922	0	0	0	0.0833333	0.0465116	0.2	0.0121951	0	0	0
solcap_snp_sl_27151	3	9.04666	0.0070922	0.00917431	0	0.16	0	0.175	0.9375	0.0121951	0	0.0163934	0
solcap_snp_sl_26280	3	9.16473	0.0070922	0	0	0	0	0.0526316	0.6	0.0121951	0	0	0
solcap_snp_sl_12414	3	9.21427	0.375	0.580952	0.344828	0.269231	0.2	0.047619	0	0.333333	0.458333	0.689655	0.446809
solcap_snp_sl_741	3	9.21647	0.362963	0.563107	0.333333	0.24	0.2	0.0731707	0.0625	0.333333	0.446809	0.678571	0.425532
solcap_snp_sl_26291	3	9.23235	0.0070922	0	0	0	0	0.0540541	0.875	0.0121951	0	0	0
solcap_snp_sl_16433	3	9.26172	0.377778	0.579439	0.389831	0.461538	0.111111	0.297297	1	0.35	0.458333	0.694915	0.4375
Le000209_237_solcap_snp_sl_26315	3	9.41686	0.0070922	0.00909091	0	0.0384615	0	0.0487805	0.533333	0.0121951	0	0.0163934	0
CL015709-0329	3	9.41695	0	0.00909091	0	0.0384615	0	0	0	0	0	0.0163934	0
SL10506_244	3	9.51934	0.0070922	0	0	0	0.166667	0.0930233	0.75	0.0121951	0	0	0
solcap_snp_sl_26323	3	9.56063	0.0070922	0.00909091	0	0.0740741	0.0909091	0.15	0.9375	0.0121951	0	0.0163934	0
SGN-U573440_snp365	3	9.69559	0.0070922	0	0.0166667	0.08	0	0.15	0.9375	0.0121951	0	0	0
solcap_snp_sl_26327	3	9.71175	0.0070922	0.00909091	0	0.0740741	0	0.139535	0.625	0.0121951	0	0.0163934	0
solcap_snp_sl_26366	3	10.1588	0.0070922	0.00909091	0.0338983	0.185185	0.363636	0.128205	0.9375	0.0121951	0	0.0163934	0
solcap_snp_sl_26385	3	10.4746	0.0070922	0	0	0.0384615	0.2	0.0789474	0.733333	0.0121951	0	0	0
solcap_snp_sl_26387	3	10.521	0.0070922	0.00909091	0	0.0769231	0.272727	0.0487805	0.333333	0.0121951	0	0.0163934	0
Le004122_27_solcap_snp_sl_26398	3	10.6711	0.0070922	0.00909091	0.0169492	0.32	0.25	0.538462	1	0.0121951	0	0.0163934	0
solcap_snp_sl_26399	3	10.6766	0.0070922	0.00909091	0	0.185185	0.363636	0.230769	0.9375	0.0121951	0	0.0163934	0
solcap_snp_sl_30106	3	11.0663	0.0070922	0.00909091	0	0.153846	0.222222	0.230769	0.9375	0.0121951	0	0.0163934	0
solcap_snp_sl_30098	3	11.2354	0.0070922	0	0	0	0	0.0232558	0.25	0.0121951	0	0	0
solcap_snp_sl_30084	3	11.3028	0.0070922	0.00909091	0	0.111111	0.222222	0.25	0.9375	0.0121951	0	0.0163934	0
solcap_snp_sl_50341	3	11.5014	0.0070922	0	0	0.04	0.222222	0.25	0.875	0.0121951	0	0	0
solcap_snp_sl_4952	3	11.5118	0.0638298	0.100917	0.298246	0.2	0.272727	0.365854	0.0625	0.0609756	0.0576923	0.131148	0.0625
solcap_snp_sl_30078	3	11.62	0.0070922	0	0	0	0	0.0238095	0.0625	0.0121951	0	0	0
solcap_snp_sl_30074	3	11.7259	0.0070922	0.00909091	0	0.0740741	0	0.121951	0.785714	0.0121951	0	0.0163934	0
solcap_snp_sl_30067	3	12.0064	0.0070922	0	0	0	0	0.125	0.8	0.0121951	0	0	0
solcap_snp_sl_18590	3	12.1613	0.0070922	0.0280374	0.207547	0.347826	0.333333	0.435897	0.9375	0.0121951	0	0.0163934	0.0434783
solcap_snp_sl_18588	3	12.1719	0.0070922	0.0277778	0.207547	0.347826	0.8	0.526316	0.9375	0.0121951	0	0.0163934	0.0425532
solcap_snp_sl_30057	3	12.1723	0.0070922	0	0	0	0	0.0238095	0.4	0.0121951	0	0	0
solcap_snp_sl_18585	3	12.1906	0.0070922	0.0277778	0.236364	0.384615	0.7	0.5	0.9375	0.0121951	0	0.0163934	0.0425532
solcap_snp_sl_18584	3	12.1906	0	0.0185185	0.192308	0.24	0.222222	0.307692	0	0	0	0	0.0425532
solcap_snp_sl_18583	3	12.1908	0.0070922	0.0185185	0.222222	0.32	0.571429	0.5	0.9375	0.0121951	0	0	0.0425532
solcap_snp_sl_18582	3	12.1912	0.0070922	0.0277778	0.222222	0.384615	0.571429	0.5	0.9375	0.0121951	0	0.0163934	0.0425532
CL008836-0339	3	12.1915	0	0.00909091	0	0.0384615	0	0	0	0	0	0.0163934	0
CL008836-0249	3	12.1916	0	0.00909091	0	0.0384615	0	0	0	0	0	0.0163934	0
solcap_snp_sl_18581	3	12.1922	0.0070922	0.0277778	0.207547	0.375	0.8	0.512821	0.9375	0.0121951	0	0.0163934	0.0425532
solcap_snp_sl_50331	3	12.2489	0.0070922	0.00909091	0	0.230769	0.333333	0.55	1	0.0121951	0	0.0163934	0
solcap_snp_sl_30046	3	12.4571	0.0070922	0.00917431	0	0.125	0.333333	0.512195	1	0.0121951	0	0.0163934	0
solcap_snp_sl_30038	3	12.7426	0.0070922	0.00909091	0	0.0740741	0	0.097561	0.857143	0.0121951	0	0.0163934	0
solcap_snp_sl_4937	3	12.8669	0.109489	0.650943	0.339623	0.461538	0.857143	0.575	1	0.160494	0.0204082	0.733333	0.543478
solcap_snp_sl_30035	3	13.1928	0.0070922	0.00917431	0	0.2	0.3	0.55	1	0.0121951	0	0.0163934	0
solcap_snp_sl_30033	3	13.3083	0.0070922	0.00909091	0	0.0384615	0	0.0731707	0.6	0.0121951	0	0.0163934	0
solcap_snp_sl_30031	3	14.1769	0.0070922	0.00909091	0	0.08	0	0.097561	0.733333	0.0121951	0	0.0163934	0
solcap_snp_sl_30024	3	14.3675	0.0070922	0.00917431	0	0.16	0.333333	0.536585	1	0.0121951	0	0.0163934	0
solcap_snp_sl_50318	3	14.7438	0.0070922	0.00909091	0	0.0769231	0	0.075	0.75	0.0121951	0	0.0163934	0
solcap_snp_sl_30015	3	14.8764	0.0070922	0.0183486	0	0.2	0.363636	0.575	1	0.0121951	0	0.0327869	0
solcap_snp_sl_30006	3	15.4751	0.0070922	0.0183486	0	0.111111	0.2	0.243902	0.9375	0.0121951	0	0.0327869	0
solcap_snp_sl_31646	3	16.3833	0.0070922	0.0181818	0	0.0384615	0	0.05	0.6875	0.0121951	0	0.0327869	0
solcap_snp_sl_31648	3	16.7788	0.0070922	0.00909091	0	0.0384615	0	0.05	0.666667	0.0121951	0	0.0163934	0
solcap_snp_sl_31653	3	16.877	0.0070922	0.0183486	0	0.111111	0.333333	0.243902	0.9375	0.0121951	0	0.0327869	0
solcap_snp_sl_31655	3	17.1533	0.0070922	0.0181818	0	0.0384615	0	0.05	0.666667	0.0121951	0	0.0327869	0
solcap_snp_sl_28583	3	18.7476	0.0070922	0	0	0	0	0.0232558	0.125	0.0121951	0	0	0
solcap_snp_sl_28586	3	19.4294	0.0070922	0.0183486	0	0.111111	0.2	0.243902	0.9375	0.0121951	0	0.0327869	0
solcap_snp_sl_36888	3	20.2289	0.0070922	0.0181818	0	0.0384615	0	0.05	0.666667	0.0121951	0	0.0327869	0
SGN-U576317_snp104_solcap_snp_sl_32529	3	20.5046	0.0070922	0.0183486	0	0.08	0.333333	0.243902	0.9375	0.0121951	0	0.0327869	0
solcap_snp_sl_32530	3	20.5183	0.0070922	0.0183486	0	0.230769	0.363636	0.575	1	0.0121951	0	0.0327869	0
solcap_snp_sl_29933	3	21.2237	0.0070922	0	0	0	0	0.0232558	0.0625	0.0121951	0	0	0
SGN-U604433_snp183_solcap_snp_sl_29934	3	21.3301	0.0070922	0.0183486	0	0.230769	0.416667	0.575	1	0.0121951	0	0.0327869	0
solcap_snp_sl_29939	3	21.4984	0.0070922	0	0	0	0	0.0232558	0.125	0.0121951	0	0	0
SGN-U564058_snp1352_solcap_snp_sl_29940	3	21.8563	0.0070922	0.00925926	0	0.0769231	0.2	0.243902	0.9375	0.0121951	0	0.0166667	0
solcap_snp_sl_29941	3	21.8564	0.0070922	0	0	0	0	0.0232558	0.0625	0.0121951	0	0	0
solcap_snp_sl_29946	3	22.0913	0.0070922	0	0	0	0	0.05	0.666667	0.0121951	0	0	0
solcap_snp_sl_29948	3	23.7048	0.0070922	0	0	0	0	0.0232558	0.0625	0.0121951	0	0	0
solcap_snp_sl_50297	3	24.2308	0.0070922	0	0	0	0	0.05	0.666667	0.0121951	0	0	0
solcap_snp_sl_50305	3	24.949	0.0070922	0.0181818	0	0.0384615	0	0.05	0.666667	0.0121951	0	0.0327869	0
solcap_snp_sl_50307	3	25.2388	0.0070922	0.0183486	0	0.111111	0.2	0.243902	0.9375	0.0121951	0	0.0327869	0
solcap_snp_sl_4926	3	25.2407	0.101449	0.613208	0.293103	0.2	0.1	0.0232558	0	0.148148	0.02	0.711864	0.489362
solcap_snp_sl_29975	3	25.557	0.0070922	0.0183486	0	0.111111	0.2	0.243902	0.9375	0.0121951	0	0.0327869	0
solcap_snp_sl_29998	3	27.4408	0.0070922	0.0190476	0	0.115385	0.333333	0.263158	0.9375	0.0121951	0	0.0327869	0
solcap_snp_sl_13743	3	27.4462	0	0.0733945	0	0	0	0	0	0	0	0.116667	0.0204082
solcap_snp_sl_51994	3	27.847	0.0070922	0	0	0.04	0.3	0.333333	1	0.0121951	0	0	0
solcap_snp_sl_30528	3	29.0179	0.0070922	0.00925926	0	0.04	0.2	0.243902	0.9375	0.0121951	0	0.0166667	0
solcap_snp_sl_30532	3	29.1513	0.0070922	0.0183486	0	0.111111	0.333333	0.243902	0.9375	0.0121951	0	0.0327869	0
solcap_snp_sl_30533	3	29.3427	0.0070922	0	0	0	0	0.0232558	0.0625	0.0121951	0	0	0
solcap_snp_sl_52143	3	29.4367	0.0070922	0.0192308	0	0.0769231	0.333333	0.268293	0.9375	0.0121951	0	0.0357143	0
SGN-U578356_snp142_solcap_snp_sl_30539	3	29.634	0.0070922	0	0	0	0	0.0232558	0.0625	0.0121951	0	0	0
solcap_snp_sl_5547	3	29.6963	0.101449	0.607477	0.305085	0.2	0.1	0	0	0.148148	0.02	0.7	0.489362
solcap_snp_sl_30540	3	29.7005	0.0070922	0	0	0.0384615	0.2	0.243902	0.9375	0.0121951	0	0	0
Le004377_94	3	29.8966	0.0070922	0.0183486	0	0.111111	0.333333	0.243902	0.9375	0.0121951	0	0.0327869	0
solcap_snp_sl_30543	3	29.8976	0.0070922	0	0	0	0	0.0487805	0.533333	0.0121951	0	0	0
solcap_snp_sl_30552	3	30.6155	0.0070922	0.0183486	0	0.115385	0.222222	0.243902	0.9375	0.0121951	0	0.0327869	0
solcap_snp_sl_30553	3	30.7579	0.0070922	0.0183486	0	0.0769231	0.2	0.243902	0.9375	0.0121951	0	0.0327869	0
solcap_snp_sl_30556	3	30.8921	0.0070922	0.0183486	0	0.111111	0.333333	0.243902	0.9375	0.0121951	0	0.0327869	0
solcap_snp_sl_30559	3	31.039	0.0070922	0.0183486	0	0.0769231	0.2	0.243902	0.9375	0.0121951	0	0.0327869	0
solcap_snp_sl_30571	3	31.3356	0.0070922	0	0	0	0	0.0232558	0.0625	0.0121951	0	0	0
solcap_snp_sl_30580	3	31.8376	0.0070922	0	0	0	0	0.0232558	0.0625	0.0121951	0	0	0
solcap_snp_sl_30586	3	32.617	0.0070922	0	0	0.0384615	0.2	0.243902	0.9375	0.0121951	0	0	0
solcap_snp_sl_30587	3	32.6776	0.0070922	0.0183486	0	0.111111	0.2	0.243902	0.9375	0.0121951	0	0.0327869	0
solcap_snp_sl_30589	3	33.1121	0.0070922	0.0183486	0	0.0769231	0.2	0.243902	0.9375	0.0121951	0	0.0327869	0
solcap_snp_sl_30590	3	33.3417	0.0070922	0	0	0	0	0.05	0.5625	0.0121951	0	0	0
CL015569-0389	3	33.9945	0	0.0181818	0	0.0384615	0	0	0	0	0	0.0327869	0
solcap_snp_sl_30593	3	34.0107	0.0070922	0.0183486	0	0.0769231	0.2	0.243902	0.9375	0.0121951	0	0.0327869	0
solcap_snp_sl_36304	3	38.3883	0.0070922	0	0	0.0384615	0.333333	0.243902	0.9375	0.0121951	0	0	0
solcap_snp_sl_36307	3	38.8009	0.0070922	0.0183486	0	0.115385	0.3	0.243902	0.9375	0.0121951	0	0.0327869	0
solcap_snp_sl_36308	3	38.8016	0.0070922	0.0183486	0	0.115385	0.222222	0.243902	0.9375	0.0121951	0	0.0327869	0
solcap_snp_sl_36309	3	38.8021	0.0070922	0.0183486	0	0.111111	0.2	0.243902	0.9375	0.0121951	0	0.0327869	0
solcap_snp_sl_30354	3	41.1597	0.0070922	0.0183486	0	0.0769231	0.2	0.243902	0.9375	0.0121951	0	0.0327869	0
solcap_snp_sl_51487	3	41.5486	0.0070922	0	0	0	0	0.0487805	0.533333	0.0121951	0	0	0
solcap_snp_sl_30377	3	41.957	0.0070922	0	0	0	0	0.0232558	0.0625	0.0121951	0	0	0
solcap_snp_sl_27253	3	42.0745	0.0070922	0.00917431	0	0.0384615	0.2	0.243902	0.9375	0.0121951	0	0.0163934	0
solcap_snp_sl_27248	3	42.3902	0.0070922	0	0	0	0	0.0487805	0.533333	0.0121951	0	0	0
solcap_snp_sl_27246	3	43.4012	0.0070922	0.00934579	0	0.0769231	0.333333	0.243902	0.9375	0.0121951	0	0.0169492	0
solcap_snp_sl_27243	3	43.5952	0.0070922	0.0183486	0	0.115385	0.363636	0.243902	0.9375	0.0121951	0	0.0327869	0
solcap_snp_sl_27238	3	43.6408	0.0070922	0.0183486	0	0.111111	0.2	0.243902	0.9375	0.0121951	0	0.0327869	0
solcap_snp_sl_1779	3	43.6415	0.875912	0.268519	0.0833333	0.153846	0	0	0	0.839506	0.959184	0.266667	0.270833
solcap_snp_sl_27230	3	43.8891	0.0070922	0	0	0	0	0.0487805	0.533333	0.0121951	0	0	0
solcap_snp_sl_42166	3	43.8895	0.0070922	0.0183486	0	0.115385	0.222222	0.243902	0.9375	0.0121951	0	0.0327869	0
solcap_snp_sl_12799	3	43.8898	0.101449	0.611111	0.305085	0.192308	0.1	0	0	0.148148	0.02	0.7	0.5
solcap_snp_sl_1773	3	43.8915	0.101449	0.607477	0.267857	0.192308	0.1	0	0	0.148148	0.02	0.7	0.489362
solcap_snp_sl_27228	3	44.2265	0.0070922	0	0	0.0384615	0.222222	0.243902	0.9375	0.0121951	0	0	0
solcap_snp_sl_1772	3	44.268	0.110294	0.638095	0.340426	0.5	0.833333	0.65	1	0.1625	0.0204082	0.733333	0.511111
CL016166-0053	3	44.3188	0	0.0181818	0	0.0384615	0	0	0	0	0	0.0327869	0
solcap_snp_sl_27224	3	44.4375	0.0070922	0	0	0	0	0.0238095	0.0666667	0.0121951	0	0	0
solcap_snp_sl_27221	3	44.7253	0.0070922	0	0	0	0	0.0238095	0.0625	0.0121951	0	0	0
solcap_snp_sl_42160	3	44.7801	0.0070922	0.0183486	0	0.115385	0	0.170732	0.8	0.0121951	0	0.0327869	0
solcap_snp_sl_30945	3	45.4434	0.0070922	0.0183486	0	0.0769231	0.2	0.225	0.875	0.0121951	0	0.0327869	0
solcap_snp_sl_5761	3	45.5911	0.0942029	0.509259	0.271186	0.259259	0.2	0.333333	0.0625	0.135802	0.02	0.6	0.395833
solcap_snp_sl_5764	3	45.5933	0.0942029	0.537037	0.271186	0.36	0.6	0.555556	0.75	0.135802	0.02	0.633333	0.416667
solcap_snp_sl_5765	3	45.5941	0.0942029	0.509259	0.271186	0.296296	0.6	0.435897	0.1875	0.135802	0.02	0.6	0.395833
solcap_snp_sl_5766	3	45.5944	0.101449	0.53271	0.280702	0.384615	0.6	0.605263	1	0.148148	0.02	0.633333	0.404255
solcap_snp_sl_5768	3	45.5978	0.0942029	0.523364	0.271186	0.296296	0.6	0.486486	0.2	0.135802	0.02	0.616667	0.404255
solcap_snp_sl_5769	3	45.5979	0.101449	0.528302	0.236364	0.37037	0.555556	0.605263	1	0.148148	0.02	0.633333	0.391304
solcap_snp_sl_5770	3	45.5983	0.0942029	0.509259	0.258621	0.259259	0.2	0.333333	0.0625	0.135802	0.02	0.6	0.395833
solcap_snp_sl_5771	3	45.6137	0.108696	0.53211	0.275862	0.346154	0.6	0.538462	0.8125	0.160494	0.02	0.633333	0.408163
solcap_snp_sl_14002	3	45.6256	0	0	0	0	0	0	0	0	0	0	0
solcap_snp_sl_5772	3	45.6264	0.122302	0.513761	0.254237	0.148148	0.1	0	0	0.17284	0.0392157	0.6	0.408163
solcap_snp_sl_5773	3	45.6301	0.116788	0.509259	0.258621	0.148148	0.1	0.1	0.733333	0.175	0.02	0.6	0.395833
solcap_snp_sl_5774	3	45.6301	0.117647	0.53271	0.258621	0.192308	0.1	0.1	0.75	0.175	0.0204082	0.644068	0.395833
solcap_snp_sl_33651	3	45.7275	0.0070922	0.0181818	0	0.0384615	0	0.0465116	0.3125	0.0121951	0	0.0327869	0
solcap_snp_sl_33652	3	45.7277	0.0070922	0	0	0	0	0.0465116	0.3125	0.0121951	0	0	0
solcap_snp_sl_30631	3	45.9551	0.0070922	0	0	0.08	0.363636	0.575	1	0.0121951	0	0	0
solcap_snp_sl_13958	3	46.0399	0	0.174312	0	0	0	0	0	0	0	0.229508	0.104167
solcap_snp_sl_5656	3	46.0446	0.0888889	0.308411	0.327586	0.28	0.3	0.0487805	0	0.125	0.0408163	0.372881	0.229167
solcap_snp_sl_30657	3	46.0832	0.0070922	0.0183486	0	0.230769	0.5	0.425	0.9375	0.0121951	0	0.0327869	0
solcap_snp_sl_30678	3	46.1754	0.0070922	0.0181818	0	0.0384615	0	0.05	0.533333	0.0121951	0	0.0327869	0
solcap_snp_sl_30704	3	46.3794	0.0070922	0	0	0	0	0.0232558	0.357143	0.0121951	0	0	0
Le011256_136_solcap_snp_sl_30707	3	46.3933	0.0070922	0	0	0	0	0.0232558	0.2	0.0121951	0	0	0
solcap_snp_sl_30722	3	46.4665	0.0070922	0	0.0163934	0	0	0.0232558	0.266667	0.0121951	0	0	0
solcap_snp_sl_18943	3	46.6108	0.0070922	0.0275229	0.0847458	0.222222	0.454545	0.65	1	0.0121951	0	0.0327869	0.0208333
solcap_snp_sl_52337	3	46.634	0.0070922	0.0181818	0	0.0384615	0	0.0238095	0.266667	0.0121951	0	0.0327869	0
CL016221-0325	3	46.6515	0.0070922	0.0183486	0.0338983	0.185185	0.333333	0.435897	1	0.0121951	0	0.0327869	0
solcap_snp_sl_18944	3	46.6771	0	0.00917431	0	0	0	0	0	0	0	0	0.0204082
solcap_snp_sl_30763	3	46.707	0.0070922	0.0181818	0	0.185185	0.166667	0.184211	0.9375	0.0121951	0	0.0327869	0
solcap_snp_sl_30774	3	46.734	0.0070922	0.00909091	0	0.0384615	0	0.0487805	0.642857	0.0121951	0	0.0163934	0
solcap_snp_sl_30776	3	46.7358	0.0070922	0.0181818	0	0.111111	0.181818	0.153846	0.9375	0.0121951	0	0.0327869	0
solcap_snp_sl_18949	3	46.7881	0.0070922	0.0909091	0.0357143	0.24	0.4	0.625	1	0.0121951	0	0.0819672	0.102041
solcap_snp_sl_18952	3	46.8429	0.0214286	0.100917	0.0754717	0.4	0.444444	0.625	1	0.037037	0	0.0819672	0.125
SL10910_315	3	46.849	0.0214286	0.0181818	0	0.0769231	0.166667	0.170732	0.9375	0.037037	0	0.0327869	0
solcap_snp_sl_18959	3	46.8893	0.0214286	0.100917	0.0769231	0.346154	0.444444	0.625	1	0.037037	0	0.0819672	0.125
CL016704-0620	3	46.8915	0	0.0825688	0.0714286	0.259259	0.2	0.425	0.0625	0	0	0.0491803	0.125
solcap_snp_sl_52352	3	46.9052	0.0214286	0	0	0	0	0.0232558	0.125	0.037037	0	0	0
solcap_snp_sl_30813	3	47.1134	0.0214286	0.00909091	0	0	0	0.0232558	0.266667	0.037037	0	0.0163934	0
solcap_snp_sl_30819	3	47.1966	0.0214286	0.0181818	0	0.0384615	0	0.047619	0.1875	0.037037	0	0.0327869	0
solcap_snp_sl_18967	3	47.2169	0.361538	0.183486	0.350877	0.2	0.272727	0.351351	0.0625	0.303797	0.511111	0.0655738	0.333333
solcap_snp_sl_30821	3	47.217	0.0214286	0.0183486	0	0.08	0	0.131579	0.6875	0.037037	0	0.0327869	0
solcap_snp_sl_30825	3	47.3716	0.0214286	0.0183486	0	0.0740741	0	0.125	0.9375	0.037037	0	0.0327869	0
solcap_snp_sl_30827	3	47.47	0.0214286	0	0	0	0	0.0731707	0.833333	0.037037	0	0	0
solcap_snp_sl_30918	3	47.8418	0.0214286	0.0183486	0	0.0384615	0	0.153846	0.9375	0.037037	0	0.0327869	0
solcap_snp_sl_52395	3	47.8965	0.0214286	0.0181818	0	0.0384615	0	0.075	0.75	0.037037	0	0.0327869	0
solcap_snp_sl_30911	3	47.9317	0.0214286	0.0275229	0.116667	0.333333	0	0.461538	1	0.037037	0	0.0327869	0.0208333
solcap_snp_sl_5722	3	48.1428	0.522727	0.433962	0.6	0.44	0.5	0.282051	0.1875	0.5625	0.413043	0.416667	0.456522
solcap_snp_sl_24081	3	48.1936	0.386364	0.0833333	0.0666667	0.04	0	0	0	0.3125	0.543478	0.0163934	0.170213
solcap_snp_sl_30876	3	48.1939	0.0285714	0	0	0	0	0.0238095	0.125	0.0493827	0	0	0
solcap_snp_sl_30359	3	48.3064	0.00714286	0	0	0	0	0.0526316	0.642857	0.0121951	0	0	0
solcap_snp_sl_18985	3	48.3502	0	0.0727273	0.103448	0.12	0.363636	0.414634	0.0625	0	0	0.0491803	0.102041
solcap_snp_sl_18984	3	48.3504	0	0.0727273	0.103448	0.153846	0.363636	0.414634	0.0625	0	0	0.0491803	0.102041
solcap_snp_sl_30862	3	48.3743	0.0285714	0	0	0	0	0.047619	0.4	0.0493827	0	0	0
solcap_snp_sl_30860	3	48.3747	0.0285714	0	0	0	0	0.105263	1	0.0493827	0	0	0
solcap_snp_sl_30857	3	48.4769	0.0285714	0.0181818	0	0.0740741	0	0.1	0.9375	0.0493827	0	0.0327869	0
solcap_snp_sl_30848	3	48.7736	0.0285714	0	0	0	0	0.1	0.9375	0.0493827	0	0	0
solcap_snp_sl_18982	3	48.9325	0	0.118182	0.288462	0.4	0.5	0.475	0.0625	0	0	0.0491803	0.204082
solcap_snp_sl_18981	3	48.9327	0	0.118182	0.303571	0.4	0.6	0.487805	0.125	0	0	0.0491803	0.204082
solcap_snp_sl_30846	3	48.9432	0.0285714	0.136364	0.275862	0.48	0.6	0.634146	0.875	0.0493827	0	0.0819672	0.204082
solcap_snp_sl_18978	3	48.9622	0	0.119266	0.327273	0.458333	0.555556	0.512195	0.0625	0	0	0.05	0.204082
solcap_snp_sl_30840	3	48.994	0.0285714	0	0	0	0	0.0487805	0.533333	0.0493827	0	0	0
solcap_snp_sl_30839	3	49.1291	0.0285714	0	0	0.0416667	0	0.102564	0.9	0.0493827	0	0	0
solcap_snp_sl_30838	3	49.1296	0.0298507	0	0	0.0434783	0	0.153846	0.928571	0.0512821	0	0	0
solcap_snp_sl_30833	3	49.1492	0.0285714	0.0183486	0	0.115385	0	0.125	0.9375	0.0493827	0	0.0327869	0
SL10736_542	3	49.1994	0.0285714	0	0	0	0	0.1	0.733333	0.0493827	0	0	0
solcap_snp_sl_52373	3	49.2256	0.0285714	0	0	0	0	0.0487805	0.25	0.0493827	0	0	0
solcap_snp_sl_52371	3	49.5092	0.0285714	0.0181818	0	0.0384615	0	0.047619	0.6	0.0493827	0	0.0327869	0
solcap_snp_sl_35295	3	49.6786	0.0285714	0	0	0	0	0.0487805	0.266667	0.0493827	0	0	0
solcap_snp_sl_35299	3	49.7626	0.0285714	0.0183486	0	0.0740741	0	0.146341	0.9375	0.0493827	0	0.0327869	0
solcap_snp_sl_35303	3	49.8548	0.0285714	0	0	0.0384615	0	0.097561	0.466667	0.0493827	0	0	0
SL20037_731	3	49.9812	0.0285714	0	0	0	0	0.0243902	0.666667	0.0493827	0	0	0
solcap_snp_sl_35313	3	50.0387	0.0285714	0	0	0	0	0.146341	0.9375	0.0493827	0	0	0
solcap_snp_sl_35323	3	50.2395	0.0285714	0	0	0	0	0.0238095	0.533333	0.0493827	0	0	0
solcap_snp_sl_35331	3	50.3385	0.0285714	0.0183486	0	0.111111	0.166667	0.170732	0.9375	0.0493827	0	0.0327869	0
solcap_snp_sl_35332	3	50.3393	0.0285714	0.0183486	0	0.0769231	0.166667	0.15	0.75	0.0493827	0	0.0327869	0
solcap_snp_sl_35333	3	50.3393	0.0215827	0	0	0	0	0.0238095	0.272727	0.0375	0	0	0
solcap_snp_sl_35335	3	50.3396	0.0285714	0.0183486	0	0.0769231	0.166667	0.170732	0.9375	0.0493827	0	0.0327869	0
SGN-U582610_snp835_solcap_snp_sl_35344	3	50.4233	0.0285714	0.0183486	0	0.153846	0.166667	0.175	0.9375	0.0493827	0	0.0327869	0
solcap_snp_sl_35345	3	50.4233	0.0285714	0.0181818	0	0.0384615	0	0.0243902	0.533333	0.0493827	0	0.0327869	0
solcap_snp_sl_65736	3	50.9861	0.0285714	0.0183486	0	0.08	0.166667	0.170732	0.9375	0.0493827	0	0.0327869	0
solcap_snp_sl_35369	3	51.2311	0.0285714	0	0	0.04	0.181818	0.146341	0.875	0.0493827	0	0	0
solcap_snp_sl_65758	3	51.3813	0.0285714	0.0183486	0	0.115385	0.181818	0.195122	0.9375	0.0493827	0	0.0327869	0
solcap_snp_sl_35382	3	51.8747	0.0285714	0.0183486	0.0535714	0.153846	0.222222	0.325	1	0.0493827	0	0.0327869	0
solcap_snp_sl_35391	3	51.9905	0.0285714	0	0	0	0	0.097561	0.333333	0.0493827	0	0	0
solcap_snp_sl_35394	3	52.1484	0.0285714	0	0	0.0384615	0.181818	0.121951	0.875	0.0493827	0	0	0
solcap_snp_sl_35397	3	52.3366	0.0285714	0	0	0	0	0.0238095	0.25	0.0493827	0	0	0
solcap_snp_sl_35407	3	52.5288	0.0070922	0.0183486	0	0.0740741	0	0.125	0.875	0.0121951	0	0.0327869	0
solcap_snp_sl_35413	3	52.6091	0.0070922	0.0183486	0	0.0769231	0.181818	0.15	0.9375	0.0121951	0	0.0327869	0
solcap_snp_sl_35443	3	52.7856	0.0070922	0.0183486	0	0.0384615	0	0.075	0.714286	0.0121951	0	0.0327869	0
solcap_snp_sl_35458	3	52.8286	0.0070922	0	0	0.04	0.181818	0.146341	0.384615	0.0121951	0	0	0
solcap_snp_sl_35459	3	52.8295	0.0070922	0.0183486	0	0.148148	0.181818	0.153846	0.9375	0.0121951	0	0.0327869	0
solcap_snp_sl_10372	3	52.8562	0.218978	0.504673	0.59322	0.73913	0.727273	0.769231	0.875	0.291139	0.0961538	0.389831	0.645833
CL016760-0706	3	52.9015	0	0.0550459	0.118644	0.153846	0.4	0.230769	0.0666667	0	0	0	0.122449
CL016760-0427	3	52.9018	0	0.00909091	0	0.0384615	0	0	0	0	0	0.0163934	0
solcap_snp_sl_35497	3	52.9526	0.0070922	0	0	0.037037	0.181818	0.1	0.8	0.0121951	0	0	0
solcap_snp_sl_10377	3	52.9536	0.343284	0.440367	0.416667	0.230769	0	0.142857	0	0.329114	0.367347	0.366667	0.530612
solcap_snp_sl_35540	3	53.0861	0.0214286	0.0727273	0.20339	0.269231	0.3	0.315789	0.9375	0.0246914	0.0192308	0.0327869	0.122449
solcap_snp_sl_21677	3	53.096	0.404412	0.0642202	0.206897	0.153846	0.1	0.170732	0	0.481481	0.333333	0	0.145833
CL016938-0536	3	53.0987	0.410448	0.0366972	0.0517241	0.148148	0.0833333	0.243243	0.9375	0.493827	0.326087	0.0327869	0.0416667
solcap_snp_sl_21682	3	53.1174	0.402985	0.0366972	0.0677966	0.185185	0.0833333	0.27027	0.9375	0.4875	0.319149	0.0327869	0.0416667
solcap_snp_sl_21683	3	53.1176	0.4	0.0277778	0.0344828	0.153846	0	0.27027	0.9375	0.4875	0.3125	0.0166667	0.0416667
solcap_snp_sl_21684	3	53.1281	0.407407	0.0366972	0.0517241	0.185185	0.0833333	0.297297	0.9375	0.493827	0.319149	0.0327869	0.0416667
solcap_snp_sl_21685	3	53.1654	0.402985	0.0181818	0.0350877	0.0769231	0	0.230769	0.733333	0.4875	0.319149	0	0.0408163
CL017533-0189	3	53.2302	0	0.0181818	0	0.0384615	0	0	0	0	0	0.0327869	0
CL017725-0420	3	53.3305	0	0.0181818	0	0.0384615	0	0	0	0	0	0.0327869	0
solcap_snp_sl_35601	3	53.4405	0	0.0181818	0	0.0769231	0	0.0238095	0.25	0	0	0.0327869	0
solcap_snp_sl_21694	3	53.5057	0.371212	0.102804	0.542373	0.56	0.363636	0.846154	0.9375	0.5	0.2	0.0491803	0.173913
solcap_snp_sl_35619	3	53.5497	0	0.0181818	0	0.111111	0	0.153846	0.875	0	0	0.0327869	0
solcap_snp_sl_35638	3	53.7844	0	0	0	0.0416667	0	0.0238095	0.733333	0	0	0	0
solcap_snp_sl_35650	3	53.8743	0.203008	0.816514	0.298246	0.153846	0	0	0	0.166667	0.204082	0.934426	0.666667
solcap_snp_sl_35677	3	54.0225	0	0.00909091	0	0	0	0.0238095	0.5	0	0	0.0163934	0
solcap_snp_sl_35693	3	54.0783	0	0.0183486	0	0.04	0	0.1	0.666667	0	0	0.0327869	0
solcap_snp_sl_35697	3	54.1089	0	0.0190476	0	0.0416667	0.0909091	0.1875	0.866667	0	0	0.0333333	0
solcap_snp_sl_21714	3	54.1123	0.358209	0.109091	0.0655738	0.115385	0	0.25	0	0.275	0.553191	0.0327869	0.204082
solcap_snp_sl_25390	3	54.1316	0.353383	0.12037	0.0877193	0.26087	0.333333	0.625	1	0.275	0.543478	0.0655738	0.191489
solcap_snp_sl_65873	3	54.2181	0	0.0183486	0	0.04	0	0.102564	0.666667	0	0	0.0327869	0
solcap_snp_sl_35720	3	54.3526	0	0	0	0	0	0.047619	0.1875	0	0	0	0
solcap_snp_sl_65880	3	54.4281	0	0.0183486	0	0.0384615	0	0.0277778	0.666667	0	0	0.0327869	0
CL015971-0495	3	54.4361	0.132353	0.0186916	0.0526316	0.12	0.0833333	0.428571	0.875	0.0731707	0.255319	0	0.0425532
CL015971-0443	3	54.4361	0	0.00909091	0	0.0384615	0	0	0	0	0	0.0163934	0
solcap_snp_sl_65890	3	54.5161	0	0	0	0.0769231	0	0.0238095	0.5	0	0	0	0
solcap_snp_sl_31018	3	54.8861	0.0070922	0.0183486	0	0.115385	0.222222	0.243902	0.9375	0.0121951	0	0.0327869	0
solcap_snp_sl_58651	3	55.6854	0	0.0183486	0	0.0769231	0	0.205128	0.9375	0	0	0.0327869	0
solcap_snp_sl_20088	3	55.7154	0.556391	0.280374	0.237288	0.407407	0.7	0.7	1	0.435897	0.755102	0.116667	0.489362
solcap_snp_sl_14715	3	55.8	0.593985	0.101852	0.2	0.185185	0.166667	0.175	0	0.582278	0.680851	0.0655738	0.148936
solcap_snp_sl_14714	3	55.8	0.609023	0.121495	0.20339	0.346154	0.583333	0.55	1	0.594937	0.702128	0.0983607	0.152174
solcap_snp_sl_58630	3	55.8203	0	0	0	0	0	0	0.428571	0	0	0	0
solcap_snp_sl_58614	3	55.8963	0	0.00909091	0	0	0	0	0.571429	0	0	0.0163934	0
solcap_snp_sl_7942	3	55.9821	0.366412	0.46729	0.275862	0.185185	0	0.0465116	0	0.531646	0.108696	0.525424	0.395833
solcap_snp_sl_7940	3	55.9867	0.341085	0.121495	0.215686	0.36	0.666667	0.525	1	0.181818	0.622222	0.0983607	0.152174
solcap_snp_sl_7939	3	56.0051	0.320611	0.0952381	0.189655	0.291667	0.363636	0.414634	0.8125	0.177215	0.6	0.0666667	0.133333
solcap_snp_sl_58584	3	56.0518	0	0.0181818	0	0.04	0	0.025	0.857143	0	0	0.0327869	0
solcap_snp_sl_58550	3	56.3224	0	0.0181818	0	0.0769231	0	0.0243902	0.769231	0	0	0.0327869	0
solcap_snp_sl_7919	3	56.4392	0.378788	0.141509	0.425926	0.56	0.555556	0.880952	1	0.2375	0.644444	0.0983607	0.2
solcap_snp_sl_58518	3	56.4815	0.0289855	0.046729	0	0.153846	0	0.153846	0.9375	0.0253165	0.0192308	0.0655738	0.0217391
solcap_snp_sl_20069	3	56.4904	0	0.0186916	0.0666667	0	0	0	0	0	0	0	0.0425532
solcap_snp_sl_15960	3	56.6283	0	0.01	0	0.0625	0	0	0	0	0	0.0172414	0
CL017449-0340	3	56.6494	0	0.00909091	0	0.0384615	0	0	0	0	0	0.0163934	0
solcap_snp_sl_69353	3	56.6564	0	0.00909091	0	0.115385	0	0.025	0.857143	0	0	0.0163934	0
solcap_snp_sl_11602	3	56.6997	0.363636	0.596154	0.254237	0.148148	0.0833333	0.0232558	0	0.538462	0.104167	0.610169	0.577778
solcap_snp_sl_62544	3	56.8213	0	0	0	0.037037	0	0	0.133333	0	0	0	0
solcap_snp_sl_9391	3	56.8219	0.335878	0.00934579	0.0689655	0.185185	0	0.219512	0.0625	0.189873	0.622222	0	0.0217391
solcap_snp_sl_9385	3	56.8472	0.346154	0.00925926	0.101695	0.222222	0	0.307692	0.0625	0.205128	0.622222	0	0.0212766
solcap_snp_sl_62531	3	57.0019	0	0.00917431	0	0.0416667	0	0.102564	0.866667	0	0	0	0.0204082
solcap_snp_sl_9383	3	57.0125	0.610687	0.0462963	0.101695	0.384615	0.363636	0.375	0.9375	0.448718	0.87234	0.0327869	0.0638298
solcap_snp_sl_9382	3	57.0304	0.615385	0.0462963	0.103448	0.423077	0.444444	0.475	1	0.454545	0.87234	0.0327869	0.0638298
solcap_snp_sl_9381	3	57.05	0.565891	0.0943396	0.0689655	0.269231	0.3	0.25	0.133333	0.394737	0.829787	0.0327869	0.177778
solcap_snp_sl_20937	3	57.0501	0.565891	0.102804	0.0983607	0.259259	0.363636	0.25	0.133333	0.394737	0.829787	0.0327869	0.195652
solcap_snp_sl_20936	3	57.0665	0.561538	0.101852	0.0983607	0.148148	0	0.139535	0	0.38961	0.829787	0.0327869	0.191489
solcap_snp_sl_62520	3	57.0716	0	0.00917431	0	0.148148	0	0.0526316	0.8125	0	0	0.0163934	0
solcap_snp_sl_9379	3	57.0886	0	0.296296	0.0327869	0	0	0	0	0	0	0.423729	0.142857
solcap_snp_sl_20933	3	57.0891	0.00714286	0.106796	0.157895	0.166667	0	0.219512	0	0	0	0.0338983	0.204545
solcap_snp_sl_9377	3	57.0999	0.561538	0.102804	0.0983607	0.148148	0	0.0697674	0	0.38961	0.829787	0.0327869	0.195652
solcap_snp_sl_20932	3	57.1423	0	0.0825688	0.220339	0.28	0	0.190476	0	0	0	0.0333333	0.142857
CL015346-0143_solcap_snp_sl_62495	3	57.2169	0.423077	0.179245	0	0.16	0	0.0238095	0.733333	0.584416	0.191489	0.233333	0.108696
CL015346-0229	3	57.217	0	0.00909091	0	0.0384615	0	0	0	0	0	0.0163934	0
solcap_snp_sl_9372	3	57.2205	0.49635	0.0925926	0.0689655	0.115385	0	0.0487805	0	0.333333	0.72	0.0327869	0.170213
CL015371-0327	3	57.3469	0	0.00909091	0	0.0384615	0	0	0	0	0	0.0163934	0
solcap_snp_sl_62473	3	57.358	0.419847	0.179245	0	0.0769231	0	0.0238095	0.533333	0.571429	0.208333	0.216667	0.130435
solcap_snp_sl_9366	3	57.3666	0.472441	0.165138	0.362069	0.269231	0	0.214286	0	0.36	0.630435	0.0327869	0.333333
SGN-U565563_snp1042_solcap_snp_sl_62467	3	57.3794	0.419847	0.196262	0	0.12	0	0.146341	0.642857	0.571429	0.208333	0.233333	0.148936
CL016891-0260	3	57.4432	0.415385	0.196262	0	0.2	0	0.15	0.666667	0.558442	0.212766	0.233333	0.148936
CL016891-0194	3	57.4433	0	0.00909091	0	0.0384615	0	0	0	0	0	0.0163934	0
CL015455-0169	3	57.4996	0.415385	0.192308	0	0.125	0	0.025	0.733333	0.558442	0.212766	0.241379	0.130435
solcap_snp_sl_62444	3	57.5355	0.575758	0.161905	0.0163934	0.04	0	0	0.285714	0.769231	0.234043	0.206897	0.106383
solcap_snp_sl_62409	3	57.6497	0.58209	0.140187	0.0163934	0	0	0	0.1875	0.769231	0.265306	0.15	0.12766
CL017416-0060	3	57.6709	0	0	0	0	0	0	0	0	0	0	0
CL017416-0406	3	57.6712	0.585185	0.17757	0.0163934	0.12	0	0.175	0.9375	0.772152	0.265306	0.183333	0.170213
solcap_snp_sl_9344	3	57.691	0.293233	0.100917	0.116667	0.230769	0	0.139535	0	0.151899	0.553191	0.0491803	0.166667
SL10909_238	3	57.7276	0.526718	0.0636364	0.0163934	0.115385	0	0.175	0.8	0.697368	0.265306	0.0491803	0.0816327
solcap_snp_sl_62377	3	57.764	0.530769	0.0636364	0.0163934	0.115385	0	0.175	0.9375	0.697368	0.270833	0.0491803	0.0816327
CL015860-0475	3	57.7994	0.526718	0.0550459	0.0163934	0.08	0	0.0238095	0.8125	0.697368	0.265306	0.0491803	0.0625
CL017298-0054_solcap_snp_sl_62362	3	57.8226	0.507576	0.0545455	0.0327869	0.192308	0.166667	0.205128	0.9375	0.662338	0.265306	0.0491803	0.0612245
CL017298-0393	3	57.8229	0	0.00909091	0	0.0384615	0	0	0	0	0	0.0163934	0
SL10206_98	3	57.8867	0.0070922	0.00909091	0.0491803	0.185185	0.0909091	0.292683	0.0625	0	0	0	0.0204082
solcap_snp_sl_62348	3	57.8949	0.503759	0.0550459	0.0655738	0.28	0.166667	0.5	1	0.649351	0.244898	0.0333333	0.0816327
solcap_snp_sl_62336	3	58.0945	0.522727	0.0545455	0.0163934	0.08	0	0.146341	0.8125	0.675325	0.270833	0.0327869	0.0816327
SL10450_71	3	58.1996	0.569231	0.0458716	0.0163934	0.12	0	0.0243902	0.785714	0.746667	0.291667	0.0327869	0.0625
solcap_snp_sl_62300	3	58.2075	0.5625	0.0366972	0.0163934	0.08	0	0	0.357143	0.743243	0.276596	0.0163934	0.0625
solcap_snp_sl_20895	3	58.2513	0.0142857	0.0454545	0.140351	0.28	0	0.219512	0.0625	0	0.0196078	0	0.102041
solcap_snp_sl_62270	3	58.3591	0.570312	0.0545455	0.0163934	0.173913	0	0.142857	0.8125	0.743243	0.297872	0.0327869	0.0816327
CL004545-0306	3	58.401	0.0070922	0.00909091	0	0.0384615	0	0	0	0	0.0192308	0.0163934	0
solcap_snp_sl_62259	3	58.4013	0.518797	0.0458716	0.0163934	0.25	0	0.025	0.666667	0.710526	0.22	0.0327869	0.0625
solcap_snp_sl_62245	3	58.4274	0.55814	0.0550459	0.107143	0.478261	0.285714	0.780488	1	0.743243	0.25	0.0327869	0.0833333
solcap_snp_sl_62228	3	58.5384	0.534884	0.037037	0.0163934	0.0869565	0	0.0769231	0.8	0.733333	0.212766	0.0166667	0.0625
solcap_snp_sl_9298	3	58.566	0.222222	0.867925	0.298246	0.208333	0.111111	0.0232558	0.0625	0.175	0.3125	0.966667	0.73913
solcap_snp_sl_62224	3	58.5939	0.192593	0.0747664	0.535714	0.416667	0.272727	0.243902	0.2	0.0769231	0.38	0.0163934	0.152174
solcap_snp_sl_20883	3	58.6393	0	0.0181818	0.0666667	0.0769231	0	0	0	0	0	0	0.0408163
solcap_snp_sl_62209	3	58.6397	0.542636	0.037037	0.0163934	0.0833333	0	0.128205	0.9375	0.743243	0.229167	0.0327869	0.0425532
solcap_snp_sl_9292	3	58.6419	0.223881	0.895238	0.438596	0.304348	0.3	0	0	0.164557	0.333333	0.966667	0.8
solcap_snp_sl_62180	3	58.7428	0.590551	0.0366972	0.0163934	0.0769231	0	0.0487805	0.714286	0.77027	0.304348	0.0327869	0.0416667
solcap_snp_sl_62166	3	58.8032	0.587786	0.0277778	0.0163934	0.0740741	0	0.0238095	0.133333	0.779221	0.276596	0.0163934	0.0425532
solcap_snp_sl_34221	3	58.8365	0	0	0.0327869	0.148148	0	0.214286	0	0	0	0	0
CL015369-0414	3	58.8765	0	0.0181818	0	0.0384615	0	0.15	0.9375	0	0	0.0163934	0.0204082
solcap_snp_sl_62133	3	58.9508	0	0.0181818	0	0.04	0	0.15	0.9375	0	0	0.0163934	0.0204082
CL017463-0220_solcap_snp_sl_62120	3	58.9869	0	0.0181818	0	0.0769231	0	0.15	0.9375	0	0	0.0163934	0.0204082
solcap_snp_sl_9260	3	59.0572	0.354331	0.0747664	0.104167	0.666667	0.571429	0.902439	1	0.157895	0.681818	0.0327869	0.130435
solcap_snp_sl_34216	3	59.0653	0	0	0.0327869	0.148148	0	0.139535	0	0	0	0	0
solcap_snp_sl_34213	3	59.0783	0.0214286	0.0185185	0.0892857	0.36	0.0833333	0.512195	0.0625	0	0.0392157	0.0163934	0.0212766
solcap_snp_sl_34210	3	59.0828	0.0214286	0.0185185	0.0727273	0.36	0.0833333	0.512195	0.0625	0	0.0392157	0.0163934	0.0212766
solcap_snp_sl_34207	3	59.0974	0.0214286	0.0183486	0.0727273	0.346154	0.0833333	0.512195	0.0625	0	0.0392157	0.0163934	0.0208333
solcap_snp_sl_34206	3	59.0977	0.0214286	0.0185185	0.0892857	0.36	0.0833333	0.512195	0.0625	0	0.0392157	0.0163934	0.0212766
solcap_snp_sl_34205	3	59.0978	0.0214286	0.0183486	0.0727273	0.346154	0.0833333	0.512195	0.0625	0	0.0392157	0.0163934	0.0208333
solcap_snp_sl_34204	3	59.0979	0.0214286	0.0185185	0.0727273	0.36	0.0833333	0.512195	0.0625	0	0.0392157	0.0163934	0.0212766
solcap_snp_sl_34203	3	59.0983	0.0214286	0.0183486	0.0877193	0.333333	0.0833333	0.512195	0.0625	0	0.0392157	0.0163934	0.0208333
solcap_snp_sl_34202	3	59.0986	0.0214286	0.0183486	0.0892857	0.346154	0.0833333	0.512195	0.0625	0	0.0392157	0.0163934	0.0208333
solcap_snp_sl_9253	3	59.099	0.328244	0.0366972	0.0166667	0.111111	0	0.0232558	0	0.153846	0.630435	0	0.0833333
solcap_snp_sl_34200	3	59.0997	0	0	0.0338983	0.185185	0	0.142857	0	0	0	0	0
solcap_snp_sl_34199	3	59.0999	0.0214286	0.0183486	0.0714286	0.346154	0.0833333	0.512195	0.0625	0	0.0392157	0.0163934	0.0208333
solcap_snp_sl_9252	3	59.1018	0.351145	0.0740741	0.152542	0.615385	0.545455	0.853659	1	0.153846	0.673913	0.0327869	0.12766
solcap_snp_sl_34196	3	59.1022	0.0283688	0.037037	0.0892857	0.416667	0.0833333	0.617647	0.8	0	0.0576923	0.0327869	0.0425532
solcap_snp_sl_34195	3	59.1023	0.0214286	0.0183486	0.0877193	0.346154	0.0833333	0.512195	0.0625	0	0.0392157	0.0163934	0.0208333
solcap_snp_sl_34193	3	59.1029	0.0214286	0.0183486	0.0714286	0.333333	0.0833333	0.512195	0.0625	0	0.0392157	0.0163934	0.0208333
solcap_snp_sl_34187	3	59.1484	0	0	0.0344828	0.185185	0	0.261905	0	0	0	0	0
solcap_snp_sl_34186	3	59.1493	0	0	0.0344828	0.185185	0	0.261905	0	0	0	0	0
CL015171-0072	3	59.1999	0	0	0	0	0	0	0	0	0	0	0
CL015171-0254	3	59.2001	0	0.0555556	0.0833333	0.0769231	0	0.047619	0.666667	0	0	0.0163934	0.106383
solcap_snp_sl_34175	3	59.311	0	0	0.0327869	0.153846	0	0.162791	0	0	0	0	0
solcap_snp_sl_62037	3	59.3378	0	0.0277778	0.05	0.08	0	0	0.8	0	0	0	0.0638298
solcap_snp_sl_9244	3	59.3674	0.641791	0.00909091	0.05	0.259259	0	0.139535	0	0.5875	0.787234	0	0.0204082
solcap_snp_sl_9241	3	59.3788	0.207143	0.853211	0.338983	0.115385	0.272727	0	0	0.259259	0.0769231	0.967213	0.708333
solcap_snp_sl_9238	3	59.418	0.649635	0.0636364	0.103448	0.4	0.1	0.384615	0.866667	0.5875	0.78	0.0163934	0.122449
solcap_snp_sl_9237	3	59.4181	0.642336	0.00990099	0.0526316	0.32	0.0909091	0.333333	0.0666667	0.5875	0.76	0	0.0217391
solcap_snp_sl_9235	3	59.4201	0.661654	0.00909091	0.0526316	0.296296	0	0.214286	0	0.602564	0.791667	0	0.0204082
CL016051-0063	3	59.4212	0	0	0	0	0	0	0	0	0	0	0
solcap_snp_sl_20865	3	59.4215	0.659091	0.0183486	0.0526316	0.333333	0	0.315789	0.5	0.597403	0.791667	0	0.0416667
solcap_snp_sl_9229	3	59.431	0.641791	0.00917431	0.0517241	0.296296	0.0909091	0.365854	0.2	0.582278	0.770833	0	0.0208333
solcap_snp_sl_9228	3	59.4316	0.659091	0.00917431	0.0847458	0.32	0.181818	0.365854	0.2	0.597403	0.791667	0	0.0208333
solcap_snp_sl_62008	3	59.4522	0	0.0458716	0.0526316	0.0740741	0	0.0487805	0.666667	0	0	0.0163934	0.0833333
solcap_snp_sl_9226	3	59.4524	0.649254	0.0636364	0.12963	0.416667	0.0833333	0.525	1	0.582278	0.791667	0.0163934	0.122449
solcap_snp_sl_9218	3	59.5254	0.641791	0.0909091	0.0909091	0.48	0.0833333	0.536585	1	0.582278	0.770833	0.0163934	0.183673
solcap_snp_sl_24926	3	59.5944	0.314961	0.00909091	0.0333333	0.259259	0	0.139535	0	0.146667	0.622222	0	0.0204082
CL015437-0110_solcap_snp_sl_61967	3	59.6191	0	0.0733945	0.05	0.08	0	0.0238095	0.6	0	0	0.0163934	0.145833
solcap_snp_sl_34165	3	59.6826	0	0	0.0163934	0.115385	0	0.0465116	0	0	0	0	0
solcap_snp_sl_34163	3	59.6971	0	0.0727273	0.0862069	0.36	0.272727	0.307692	0.9375	0	0	0.0163934	0.142857
SGN-U584349_snp118	3	59.8799	0	0	0	0.0769231	0.25	0.0232558	0.133333	0	0	0	0
solcap_snp_sl_61938	3	59.9031	0	0.0363636	0.0517241	0.2	0.3	0.121951	0.9375	0	0	0.0163934	0.0612245
SGN-U565536_snp46769	3	59.9354	0	0.0363636	0.0666667	0.2	0.363636	0.121951	0.9375	0	0	0.0163934	0.0612245
SGN-U604240_snp45533	3	59.9367	0	0.0363636	0.0666667	0.192308	0.363636	0.097561	0.75	0	0	0.0163934	0.0612245
SGN-U604240_snp45509	3	59.9367	0	0.0363636	0.0666667	0.192308	0.363636	0.097561	0.75	0	0	0.0163934	0.0612245
CL017760-0371_solcap_snp_sl_61928	3	59.9416	0	0.0275229	0.0508475	0.12	0	0.0243902	0.733333	0	0	0.0163934	0.0416667
CL017760-0099	3	59.9418	0	0	0	0	0	0	0	0	0	0	0
CL015662-0214	3	60.0722	0	0.0272727	0.0689655	0.125	0	0.175	0.9375	0	0	0.0163934	0.0408163
solcap_snp_sl_34143	3	60.1151	0	0	0.0169492	0.148148	0	0.0232558	0	0	0	0	0
SGN-U579212_snp23699	3	60.1236	0	0	0	0	0	0.0930233	0.2	0	0	0	0
SGN-U579212_snp24949	3	60.1248	0	0	0	0	0	0.0930233	0.2	0	0	0	0
SGN-U579212_snp25451	3	60.1253	0	0	0	0	0	0.0930233	0.2	0	0	0	0
SGN-U579212_snp25597	3	60.1255	0	0	0	0	0	0.0930233	0.2	0	0	0	0
SGN-U582689_snp30543	3	60.1304	0	0	0	0.037037	0	0.0697674	0.266667	0	0	0	0
solcap_snp_sl_61886	3	60.1531	0	0.0275229	0.0666667	0.111111	0	0.047619	0.125	0	0	0.0327869	0.0208333
solcap_snp_sl_61881	3	60.1936	0	0.0181818	0.0508475	0.0769231	0	0.0731707	0.642857	0	0	0.0163934	0.0204082
solcap_snp_sl_61880	3	60.1942	0	0.0183486	0.0689655	0.08	0	0.243902	0.9375	0	0	0.0163934	0.0208333
solcap_snp_sl_34141	3	60.331	0	0	0.0163934	0.148148	0	0.0232558	0.133333	0	0	0	0
solcap_snp_sl_61875	3	60.341	0.0431655	0.0183486	0.0508475	0.0769231	0	0.190476	0.642857	0.0625	0	0.0163934	0.0208333
CL015521-0417	3	60.3935	0	0.00909091	0.05	0.0740741	0	0	0.25	0	0	0	0.0204082
solcap_snp_sl_20835	3	60.4196	0.0428571	0.0181818	0.118644	0.0384615	0	0	0	0.0487805	0.0196078	0	0.0408163
solcap_snp_sl_61853	3	60.4584	0.0431655	0.0183486	0.0701754	0.0769231	0	0.166667	0.714286	0.0625	0	0.0163934	0.0208333
solcap_snp_sl_61847	3	60.5162	0.0431655	0.0181818	0.103448	0.0740741	0	0.0769231	0.714286	0.0625	0	0.0163934	0.0204082
solcap_snp_sl_61820	3	60.6986	0.0431655	0.00917431	0	0.04	0	0.214286	0.866667	0.0625	0	0.0163934	0
solcap_snp_sl_9141	3	60.7731	0.351145	0.711538	0.45098	0.217391	0.333333	0.219512	0.9375	0.333333	0.369565	0.844828	0.543478
solcap_snp_sl_9140	3	60.7736	0.351145	0.691589	0.410714	0.208333	0.333333	0.0731707	0.785714	0.333333	0.369565	0.830508	0.520833
solcap_snp_sl_9139	3	60.7737	0.360902	0.707547	0.45283	0.24	0.4	0.0731707	0.785714	0.341772	0.382979	0.844828	0.541667
solcap_snp_sl_9138	3	60.7738	0.348485	0.688679	0.410714	0.208333	0.333333	0.0731707	0.785714	0.333333	0.361702	0.827586	0.520833
solcap_snp_sl_9137	3	60.7739	0.351145	0.701923	0.433962	0.208333	0.333333	0.0731707	0.714286	0.333333	0.369565	0.842105	0.531915
solcap_snp_sl_9136	3	60.7776	0.360902	0.708738	0.418182	0.208333	0.333333	0.219512	0.666667	0.341772	0.382979	0.842105	0.543478
solcap_snp_sl_9135	3	60.7779	0.360902	0.711538	0.45098	0.25	0.333333	0.219512	0.9375	0.341772	0.382979	0.844828	0.543478
solcap_snp_sl_9134	3	60.7783	0.351145	0.688679	0.410714	0.2	0.333333	0.0731707	0.8	0.333333	0.369565	0.827586	0.520833
solcap_snp_sl_9133	3	60.7786	0.348485	0.688679	0.410714	0.208333	0.333333	0.0731707	0.8	0.333333	0.361702	0.827586	0.520833
solcap_snp_sl_9132	3	60.7787	0.348485	0.691589	0.410714	0.208333	0.333333	0.0731707	0.8	0.333333	0.361702	0.830508	0.520833
solcap_snp_sl_9131	3	60.7788	0.351145	0.688679	0.410714	0.2	0.333333	0.0731707	0.8	0.333333	0.369565	0.827586	0.520833
solcap_snp_sl_61803	3	60.779	0.353383	0.691589	0.4	0.2	0.333333	0.0731707	0.8	0.341772	0.361702	0.830508	0.520833
solcap_snp_sl_9130	3	60.7874	0.363636	0.768519	0.421053	0.24	0.4	0.219512	0.785714	0.333333	0.404255	0.933333	0.5625
solcap_snp_sl_9129	3	60.7875	0.368421	0.766355	0.421053	0.230769	0.4	0.219512	0.785714	0.341772	0.404255	0.933333	0.553191
SL10494_706_CL009124-0515	3	60.7907	0.365672	0.768519	0.421053	0.230769	0.4	0.219512	0.785714	0.341772	0.395833	0.933333	0.5625
CL009124-0423	3	60.7908	0	0	0	0	0	0	0	0	0	0	0
solcap_snp_sl_9128	3	60.7954	0.353846	0.766355	0.4	0.217391	0.333333	0.219512	0.9375	0.333333	0.377778	0.933333	0.553191
solcap_snp_sl_9127	3	60.7959	0.358779	0.773585	0.45098	0.208333	0.333333	0.190476	0.266667	0.333333	0.391304	0.933333	0.565217
solcap_snp_sl_9126	3	60.7963	0.358779	0.766355	0.410714	0.208333	0.333333	0.219512	0.857143	0.333333	0.391304	0.933333	0.553191
solcap_snp_sl_24909	3	60.8024	0.358779	0.766355	0.410714	0.24	0.333333	0.2	0.857143	0.333333	0.391304	0.933333	0.553191
solcap_snp_sl_9125	3	60.8027	0.368421	0.768519	0.421053	0.24	0.4	0.219512	0.857143	0.341772	0.404255	0.933333	0.5625
solcap_snp_sl_9124	3	60.8027	0.0510204	0.757282	0.2	0.0909091	0	0.219512	0.857143	0.0508475	0.0571429	0.931034	0.533333
solcap_snp_sl_9123	3	60.8036	0.353846	0.766355	0.410714	0.208333	0.333333	0.219512	0.846154	0.333333	0.377778	0.933333	0.553191
solcap_snp_sl_9122	3	60.8037	0.353846	0.766355	0.410714	0.217391	0.333333	0.219512	0.9375	0.333333	0.377778	0.933333	0.553191
solcap_snp_sl_15173	3	60.8068	0.353846	0.766355	0.4	0.208333	0.333333	0.219512	0.928571	0.333333	0.377778	0.933333	0.553191
solcap_snp_sl_9118	3	60.8075	0.368421	0.768519	0.421053	0.24	0.4	0.219512	0.928571	0.341772	0.404255	0.933333	0.5625
solcap_snp_sl_61800	3	60.8172	0.294574	0.785047	0.410714	0.208333	0.333333	0.05	0.466667	0.246753	0.377778	0.933333	0.595745
solcap_snp_sl_9117	3	60.8177	0.40625	0.101852	0.245283	0.454545	0.333333	0.162791	0	0.527027	0.234043	0.0166667	0.208333
solcap_snp_sl_9116	3	60.8179	0.305344	0.787037	0.45098	0.24	0.333333	0.05	0.533333	0.25641	0.391304	0.933333	0.604167
solcap_snp_sl_9115	3	60.8183	0.305344	0.785047	0.410714	0.208333	0.333333	0.0731707	0.538462	0.25641	0.391304	0.933333	0.595745
solcap_snp_sl_20809	3	60.85	0.572519	0.138889	0.396226	0.68	0.5	0.725	0.357143	0.564103	0.608696	0.0491803	0.255319
solcap_snp_sl_20803	3	60.8593	0.568182	0.146789	0.384615	0.692308	0.454545	0.928571	0.666667	0.564103	0.595745	0.0491803	0.270833
solcap_snp_sl_20802	3	60.8601	0.410853	0.834862	0.553571	0.24	0.5	0.0465116	0.142857	0.421053	0.369565	0.934426	0.708333
solcap_snp_sl_20801	3	60.8624	0.431818	0.836364	0.561404	0.269231	0.545455	0.0232558	0.0666667	0.435897	0.404255	0.934426	0.714286
solcap_snp_sl_20800	3	60.8871	0.568182	0.138889	0.428571	0.666667	0.5	0.804878	0.285714	0.564103	0.595745	0.0491803	0.255319
solcap_snp_sl_34126	3	60.8933	0.581395	0.148148	0.454545	0.708333	0.5	0.780488	0.214286	0.571429	0.622222	0.0491803	0.276596
solcap_snp_sl_61794	3	60.8935	0	0	0	0.037037	0	0	0.0625	0	0	0	0
solcap_snp_sl_34125	3	60.8937	0.584615	0.154545	0.446429	0.692308	0.5	0.902439	0.357143	0.571429	0.630435	0.0491803	0.285714
solcap_snp_sl_34124	3	60.8998	0.572519	0.148148	0.438596	0.653846	0.5	0.780488	0.0625	0.564103	0.608696	0.0491803	0.276596
solcap_snp_sl_20794	3	60.9316	0.568182	0.146789	0.396226	0.653846	0.5	0.925	0.214286	0.564103	0.595745	0.0491803	0.270833
solcap_snp_sl_20779	3	60.9528	0.581395	0.146789	0.438596	0.592593	0.5	0.780488	0.0625	0.571429	0.622222	0.0491803	0.270833
solcap_snp_sl_20777	3	60.9584	0.55814	0.154545	0.428571	0.625	0.5	0.925	0.75	0.571429	0.577778	0.0491803	0.285714
solcap_snp_sl_20776	3	60.9644	0.5625	0.155963	0.436364	0.652174	0.454545	0.925	0.571429	0.571429	0.590909	0.0491803	0.291667
solcap_snp_sl_20775	3	60.9645	0.565891	0.155963	0.428571	0.666667	0.454545	0.925	0.571429	0.571429	0.6	0.0491803	0.291667
solcap_snp_sl_20773	3	60.9708	0.614173	0.146789	0.384615	0.652174	0.5	0.925	0.769231	0.644737	0.590909	0.0491803	0.270833
solcap_snp_sl_20772	3	60.9711	0.609375	0.154545	0.428571	0.625	0.5	0.925	0.8	0.644737	0.577778	0.0491803	0.285714
solcap_snp_sl_20771	3	60.9715	0.545455	0.138889	0.365385	0.576923	0.4	0.775	0.0625	0.564103	0.553191	0.0491803	0.255319
solcap_snp_sl_20770	3	60.9716	0.614173	0.148148	0.436364	0.6	0.5	0.794872	0.25	0.644737	0.590909	0.0491803	0.276596
CL009269-0219	3	60.9731	0.549618	0.146789	0.421053	0.555556	0.416667	0.775	0.0625	0.564103	0.565217	0.0491803	0.270833
CL009269-0272	3	60.9732	0	0	0	0	0	0	0	0	0	0	0
solcap_snp_sl_20769	3	60.9766	0.5625	0.148148	0.428571	0.6	0.454545	0.775	0.0625	0.571429	0.590909	0.0491803	0.276596
solcap_snp_sl_20765	3	60.983	0.390625	0.836364	0.578947	0.375	0.545455	0.0487805	0.0625	0.355263	0.422222	0.934426	0.714286
solcap_snp_sl_20764	3	60.9833	0.5625	0.146789	0.428571	0.6	0.454545	0.775	0.0625	0.571429	0.590909	0.0491803	0.270833
solcap_snp_sl_20763	3	60.9867	0.5625	0.146789	0.428571	0.6	0.454545	0.775	0.0625	0.571429	0.590909	0.0491803	0.270833
solcap_snp_sl_20762	3	60.987	0.557252	0.154545	0.421053	0.615385	0.416667	0.925	0.4375	0.564103	0.586957	0.0491803	0.285714
solcap_snp_sl_34121	3	61.0041	0.5625	0.140187	0.428571	0.6	0.454545	0.775	0.0625	0.571429	0.590909	0.0491803	0.26087
solcap_snp_sl_20760	3	61.0051	0.549618	0.154545	0.421053	0.6	0.416667	0.925	0.357143	0.564103	0.565217	0.0491803	0.285714
solcap_snp_sl_20759	3	61.0096	0.5625	0.140187	0.418182	0.6	0.454545	0.775	0.0714286	0.571429	0.590909	0.0491803	0.26087
solcap_snp_sl_20757	3	61.0304	0.55814	0.148148	0.428571	0.625	0.454545	0.775	0.0625	0.571429	0.577778	0.0491803	0.276596
solcap_snp_sl_20752	3	61.0316	0.614173	0.154545	0.436364	0.652174	0.454545	0.923077	0.384615	0.644737	0.590909	0.0491803	0.285714
solcap_snp_sl_20751	3	61.0489	0.55814	0.146789	0.428571	0.652174	0.454545	0.926829	0.866667	0.571429	0.577778	0.0491803	0.270833
solcap_snp_sl_20748	3	61.0585	0.557252	0.146789	0.421053	0.576923	0.416667	0.756098	0.0769231	0.564103	0.586957	0.0491803	0.270833
solcap_snp_sl_20745	3	61.0607	0.5625	0.148148	0.436364	0.6	0.454545	0.75	0.0625	0.571429	0.590909	0.0491803	0.276596
solcap_snp_sl_20743	3	61.0613	0.553846	0.146789	0.377358	0.625	0.4	0.9	0.4	0.564103	0.577778	0.0491803	0.270833
solcap_snp_sl_20737	3	61.0725	0.5625	0.155963	0.436364	0.695652	0.5	0.904762	0.866667	0.571429	0.590909	0.0491803	0.291667
solcap_snp_sl_20736	3	61.0749	0.55814	0.155963	0.428571	0.695652	0.5	0.904762	0.866667	0.571429	0.577778	0.0491803	0.291667
solcap_snp_sl_20731	3	61.0811	0.55814	0.146789	0.403509	0.538462	0.454545	0.707317	0.0625	0.571429	0.577778	0.0491803	0.270833
solcap_snp_sl_20730	3	61.0953	0.545455	0.12963	0.421053	0.555556	0.454545	0.75	0.0625	0.564103	0.553191	0.0327869	0.255319
solcap_snp_sl_34116	3	61.0966	0.561538	0.137615	0.428571	0.653846	0.5	0.75	0.0625	0.571429	0.586957	0.0327869	0.270833
solcap_snp_sl_34115	3	61.1013	0.546154	0.145455	0.421053	0.72	0.454545	0.95122	0.846154	0.564103	0.555556	0.0327869	0.285714
solcap_snp_sl_61769	3	61.132	0	0	0	0.037037	0	0	0.0625	0	0	0	0
solcap_snp_sl_34114	3	61.1324	0.5625	0.138889	0.372549	0.653846	0.555556	0.875	0.133333	0.571429	0.590909	0.0327869	0.276596
solcap_snp_sl_20724	3	61.1334	0.5625	0.145455	0.428571	0.625	0.5	0.926829	0.846154	0.571429	0.590909	0.0327869	0.285714
solcap_snp_sl_20723	3	61.135	0.566929	0.148148	0.418182	0.625	0.5	0.902439	0.714286	0.571429	0.604651	0.0327869	0.297872
solcap_snp_sl_20721	3	61.157	0.223077	0.146789	0.421053	0.6	0.5	0.902439	0.533333	0.106667	0.395833	0.0327869	0.291667
solcap_snp_sl_20720	3	61.157	0.232558	0.148148	0.428571	0.576923	0.5	0.75	0.0625	0.108108	0.416667	0.0327869	0.297872
solcap_snp_sl_20719	3	61.1647	0.224806	0.12963	0.428571	0.6	0.5	0.775	0.1875	0.106667	0.404255	0.0327869	0.255319
solcap_snp_sl_20718	3	61.1664	0.224806	0.136364	0.428571	0.625	0.5	0.902439	0.2	0.106667	0.404255	0.0327869	0.265306
solcap_snp_sl_20714	3	61.1807	0.244275	0.137615	0.436364	0.64	0.555556	0.95122	0.666667	0.157895	0.354167	0.0327869	0.270833
solcap_snp_sl_20710	3	61.1864	0.19084	0.137615	0.428571	0.625	0.5	0.925	0.285714	0.0789474	0.354167	0.0327869	0.270833
solcap_snp_sl_20703	3	61.1893	0.19084	0.12844	0.428571	0.6	0.454545	0.756098	0.1875	0.0789474	0.354167	0.0327869	0.25
solcap_snp_sl_20702	3	61.2146	0.19084	0.137615	0.436364	0.666667	0.555556	0.906977	0.857143	0.0789474	0.354167	0.0327869	0.270833
solcap_snp_sl_20699	3	61.2156	0.19084	0.136364	0.421053	0.68	0.555556	0.906977	0.866667	0.0789474	0.354167	0.0327869	0.265306
solcap_snp_sl_61762	3	61.2172	0.19084	0.136364	0.428571	0.666667	0.555556	0.904762	0.785714	0.0789474	0.354167	0.0327869	0.265306
solcap_snp_sl_34106	3	61.2793	0	0.0183486	0.296296	0.538462	0.4	0.634146	0.0625	0	0	0	0.0416667
CL015122-0237	3	61.2794	0	0	0	0	0	0	0	0	0	0	0
solcap_snp_sl_20690	3	61.3092	0.0571429	0.0366972	0.169811	0.375	0.333333	0.904762	1	0.0617284	0.0192308	0.0163934	0.0625
CL015880-0286	3	61.3258	0	0	0	0	0	0	0	0	0	0	0
solcap_snp_sl_34105	3	61.3529	0.0571429	0.0277778	0.0980392	0.363636	0.111111	0.833333	1	0.0617284	0.0192308	0.0163934	0.0425532
solcap_snp_sl_61721	3	61.3983	0.0428571	0	0	0.037037	0	0	0.428571	0.0617284	0	0	0
CL015004-0267	3	61.4851	0	0	0	0	0	0	0	0	0	0	0
CL015004-0352	3	61.4852	0	0	0	0	0	0	0	0	0	0	0
solcap_snp_sl_61677	3	61.5197	0.0428571	0	0	0.037037	0	0.0238095	0.461538	0.0617284	0	0	0
solcap_snp_sl_61670	3	61.566	0	0	0	0.037037	0	0.0243902	0.714286	0	0	0	0
solcap_snp_sl_61666	3	61.5745	0	0	0	0.037037	0	0.0238095	0.125	0	0	0	0
solcap_snp_sl_61634	3	61.6741	0	0.0183486	0	0.04	0.0833333	0.315789	0.928571	0	0	0.0163934	0.0208333
SGN-U577717_snp348_solcap_snp_sl_61632	3	61.6804	0	0.0183486	0	0.0833333	0.166667	0.4	0.9375	0	0	0.0163934	0.0208333
SL10678_608	3	61.9195	0.0571429	0	0	0.0384615	0.0833333	0.0487805	0.4375	0.0617284	0.0384615	0	0
solcap_snp_sl_61554	3	62.0042	0	0	0	0	0	0.0238095	0.142857	0	0	0	0
solcap_snp_sl_34089	3	62.0454	0	0	0	0.0384615	0	0.047619	0.0833333	0	0	0	0
solcap_snp_sl_34088	3	62.0593	0	0	0	0.0384615	0	0.097561	0.615385	0	0	0	0
solcap_snp_sl_34056	3	62.2388	0	0	0	0.037037	0	0.0465116	0.0625	0	0	0	0
solcap_snp_sl_34053	3	62.2395	0	0	0	0.037037	0	0.0465116	0.2	0	0	0	0
solcap_snp_sl_34050	3	62.253	0	0	0	0.037037	0	0.0465116	0.25	0	0	0	0
solcap_snp_sl_34048	3	62.2584	0	0	0	0.08	0	0.195122	0.6875	0	0	0	0
SL10003_496	3	62.3016	0	0	0	0	0	0	0.0625	0	0	0	0
solcap_snp_sl_34027	3	62.3474	0	0	0	0.0740741	0	0.0697674	0.266667	0	0	0	0
solcap_snp_sl_34015	3	62.4582	0	0	0	0.0740741	0	0.0697674	0.2	0	0	0	0
solcap_snp_sl_34013	3	62.4664	0	0.00909091	0	0.08	0.0833333	0.225	0.9375	0	0	0	0.0204082
solcap_snp_sl_34007	3	62.516	0	0	0	0.0740741	0	0.0232558	0	0	0	0	0
solcap_snp_sl_33975	3	62.682	0	0.00909091	0	0	0	0.225	0.857143	0	0	0	0.0204082
solcap_snp_sl_33971	3	62.7471	0	0	0	0	0	0.047619	0.133333	0	0	0	0
solcap_snp_sl_33970	3	62.7472	0	0	0	0	0	0.0232558	0	0	0	0	0
solcap_snp_sl_33968	3	62.7647	0	0.00909091	0	0.0384615	0	0.2	0.9375	0	0	0	0.0204082
solcap_snp_sl_33965	3	62.7771	0	0	0	0	0	0.0232558	0	0	0	0	0
solcap_snp_sl_33958	3	62.7919	0	0	0	0	0	0.0465116	0.133333	0	0	0	0
solcap_snp_sl_33949	3	62.8177	0	0	0	0.037037	0	0.0465116	0.533333	0	0	0	0
solcap_snp_sl_33948	3	62.8182	0	0	0	0.0384615	0	0.0571429	0.692308	0	0	0	0
solcap_snp_sl_33935	3	62.8755	0	0	0	0.037037	0	0.047619	0.333333	0	0	0	0
SL20050_135	3	62.8771	0	0	0	0.0769231	0	0.175	0.8	0	0	0	0
solcap_snp_sl_33933	3	62.8786	0	0	0	0.037037	0	0.0232558	0.0666667	0	0	0	0
CL017699-0108_solcap_snp_sl_61460	3	63.0624	0	0	0	0	0	0.0238095	0.733333	0	0	0	0
solcap_snp_sl_61437	3	63.1639	0	0.00909091	0	0	0	0.15	0.9375	0	0	0	0.0204082
solcap_snp_sl_33905	3	63.2964	0	0.00917431	0.0163934	0	0	0.2	0.538462	0	0	0	0.0208333
solcap_snp_sl_61411	3	63.3356	0	0.00917431	0	0	0	0.175	0.866667	0	0	0	0.0208333
Le007369_198	3	63.3523	0	0.00909091	0.0163934	0.037037	0	0.146341	0.5	0	0	0	0.0204082
solcap_snp_sl_33882	3	63.3537	0	0	0	0	0	0.0697674	0.5	0	0	0	0
CL000226-0238	3	63.3537	0	0	0	0	0	0	0	0	0	0	0
solcap_snp_sl_33877	3	63.4032	0	0	0	0	0	0.0487805	0.866667	0	0	0	0
solcap_snp_sl_33855	3	63.5242	0	0.00909091	0	0	0	0.153846	0.933333	0	0	0	0.0204082
solcap_snp_sl_33838	3	63.6083	0	0	0	0.0416667	0	0.6	1	0	0	0	0
solcap_snp_sl_33830	3	63.8131	0	0.0272727	0.0517241	0.208333	0.272727	0.684211	0.416667	0	0	0.0163934	0.0408163
solcap_snp_sl_33829	3	63.8136	0	0.0272727	0.037037	0.217391	0.3	0.7	1	0	0	0.0163934	0.0408163
solcap_snp_sl_33828	3	63.8137	0	0.0181818	0.037037	0.16	0.333333	0.540541	0.0625	0	0	0.0163934	0.0204082
solcap_snp_sl_33827	3	63.8139	0	0.0181818	0.0689655	0.16	0.272727	0.552632	0.0769231	0	0	0.0163934	0.0204082
solcap_snp_sl_33822	3	63.8625	0	0.0181818	0.0350877	0.16	0.272727	0.589744	0.1875	0	0	0.0163934	0.0204082
solcap_snp_sl_33819	3	63.9661	0.380952	0.0925926	0.290909	0.5	0.5	0.953488	1	0.368421	0.44186	0.0327869	0.170213
solcap_snp_sl_33817	3	64.0945	0.296	0.0366972	0.12069	0.153846	0.0833333	0.447368	0	0.28	0.372093	0.0163934	0.0625
solcap_snp_sl_33815	3	64.1356	0.298387	0.0458716	0.0576923	0.208333	0.0833333	0.7	0.875	0.283784	0.372093	0.0163934	0.0833333
solcap_snp_sl_61238	3	64.2811	0	0.00909091	0	0.04	0	0.102564	0.9375	0	0	0	0.0204082
solcap_snp_sl_36548	3	64.3155	0.212598	0.037037	0.134615	0.269231	0.444444	0.463415	0.0625	0.285714	0.116279	0.0163934	0.0638298
CL016304-0420	3	64.3276	0	0	0	0	0	0	0	0	0	0	0
solcap_snp_sl_22017	3	64.3971	0.330882	0.925234	0.611111	0.391304	0.375	0.0465116	0	0.3375	0.244898	0.983607	0.847826
solcap_snp_sl_36544	3	64.4183	0.359375	0.0377358	0.142857	0.409091	0.444444	0.738095	1	0.5	0.162791	0	0.0888889
solcap_snp_sl_67705	3	64.4456	0	0.00909091	0	0.04	0	0.102564	0.875	0	0	0	0.0204082
[truncated: 5,313 more rows]

## Sheet: Table S5
Table S5. PCA loadings for PC1 and PC2 in the three representative sub-populations of cultivated germplasm (processing, fresh market, and vintage)
	Phyiscal Map		Genetic Map (EXPIM 2012)
SNP marker	Chromosome	Position (Mbp)	Chromosome	Position (cM)	PC1	PC2
solcap_snp_sl_15058	1	0.045434	1	0	-0.0224429	-0.00387298
solcap_snp_sl_60635	1	0.047132	1	0	-4.67e-15	6.55e-16
solcap_snp_sl_60604	1	0.192109	1	0.2712	-0.000645931	0.00246511
solcap_snp_sl_15054	1	0.299696	1	0.5425	-0.0171426	-0.00442224
solcap_snp_sl_15052	1	0.301597	1	0.5425	-0.0192921	-0.00437373
solcap_snp_sl_15051	1	0.301603	1	0.5425	-0.0182376	-0.00403336
solcap_snp_sl_15050	1	0.303076	1	0.5425	-0.0176855	-0.00466828
solcap_snp_sl_15049	1	0.303202	1	0.5425	-0.0182483	-0.00404099
CL004303-0524	1	0.310894	1	0.5425	-0.000698175	0.00251168
solcap_snp_sl_24809	1	0.324852	1	0.5425	-0.0215644	0.0211224
CL016197-0363_solcap_snp_sl_60559	1	0.336495	1	0.5425	-0.000698175	0.00251168
solcap_snp_sl_60557	1	0.338651	1	0.5425	-0.000698175	0.00251168
solcap_snp_sl_24799	1	0.669686	1	3.3219	-0.00602633	-0.0150528
solcap_snp_sl_33737	1	0.8537	1	4.1455	-0.00992414	-0.00575195
solcap_snp_sl_60417	1	0.986514	1	4.6974	-0.00116085	0.00247157
solcap_snp_sl_60360	1	1.33777	1	7.7585	-0.000925233	0.00260935
solcap_snp_sl_8704	1	1.47086	1	8.5818	-0.00263758	-0.00483116
solcap_snp_sl_60330	1	1.51138	1	9.4052	0.00147335	0.00311519
solcap_snp_sl_60318	1	1.52433	1	9.9568	0.00118578	0.00302385
solcap_snp_sl_60303	1	1.60569	1	10.7804	-0.000925233	0.00260935
solcap_snp_sl_60296	1	1.67868	1	12.1578	-0.000925233	0.00260935
solcap_snp_sl_60276	1	1.80937	1	13.5353	-0.000633863	0.00276364
solcap_snp_sl_60250	1	2.11711	1	19.5054	0.00260099	0.00161325
solcap_snp_sl_60227	1	2.20086	1	19.5054	0.00245871	0.00104934
solcap_snp_sl_8669	1	2.25588	1	19.5054	-0.0104196	0.0011271
solcap_snp_sl_8668	1	2.31163	1	19.5054	-0.00892871	-0.00103177
solcap_snp_sl_8667	1	2.31176	1	19.5054	-0.00927065	-0.00120554
solcap_snp_sl_24787	1	2.37187	1	19.5054	-0.00772225	-0.00208683
solcap_snp_sl_60160	1	2.39503	1	19.5054	0.00286832	0.00136278
solcap_snp_sl_8656	1	2.44652	1	20.0572	0.000864836	-0.00721607
solcap_snp_sl_8655	1	2.44673	1	20.0572	0.000962986	-0.00703912
solcap_snp_sl_8653	1	2.46163	1	20.3284	-0.00422799	0.00661454
solcap_snp_sl_8651	1	2.46325	1	20.3284	0.00263181	-0.00681919
SGN-U573329_snp393	1	2.47612	1	20.3284	0.00259108	0.00128999
solcap_snp_sl_60143	1	2.50774	1	20.8801	0.00249467	0.00126746
solcap_snp_sl_8640	1	2.55437	1	21.98	-0.0153706	-0.0112885
solcap_snp_sl_60135	1	2.57281	1	21.98	0.00286476	0.00109162
solcap_snp_sl_8639	1	2.58171	1	22.2512	-0.014449	-0.0105455
solcap_snp_sl_60089	1	2.87916	1	25.6179	-0.000303202	5.67e-06
solcap_snp_sl_60043	1	3.10194	1	27.2831	-0.000259032	7.48e-05
solcap_snp_sl_60008	1	3.25523	1	29.4999	-0.000259032	7.48e-05
solcap_snp_sl_59975	1	3.48608	1	30.6003	-0.000398235	-4.05e-05
solcap_snp_sl_59964	1	3.59131	1	31.9787	-0.000148658	2.4e-05
solcap_snp_sl_59944	1	3.69575	1	33.3573	-0.000351016	0.000226247
solcap_snp_sl_20438	1	3.89974	1	34.7361	-0.00552394	-0.000988996
solcap_snp_sl_59890	1	4.59795	1	36.9556	-0.000391614	-0.000115834
solcap_snp_sl_59885	1	4.66944	1	37.5079	4.51e-17	2.58e-17
solcap_snp_sl_33677	1	4.87134	1	38.3321	-0.00305694	-0.00187015
solcap_snp_sl_59869	1	4.9487	1	38.8968	3.01e-17	4.88e-17
solcap_snp_sl_59817	1	5.08745	1	39.4615	-0.00152827	-0.000931754
solcap_snp_sl_59806	1	5.34003	1	40.2858	-1.15e-17	-1.53e-16
solcap_snp_sl_59801	1	5.36466	1	40.2858	-9.92e-05	-2.42e-05
solcap_snp_sl_59784	1	5.72652	1	40.8382	-0.00034346	-0.000166895
solcap_snp_sl_59778	1	5.82325	1	40.8382	-9.92e-05	-2.42e-05
solcap_snp_sl_59768	1	6.30686	1	40.8382	2.04e-17	-6.05e-17
solcap_snp_sl_59754	1	6.84063	1	40.8382	-2.45e-17	-1.82e-16
solcap_snp_sl_59748	1	7.57671	1	40.8382	6.04e-17	1.13e-16
solcap_snp_sl_59745	1	7.61709	1	40.8382	-1.95e-18	5.72e-18
solcap_snp_sl_41302	1	11.9279	1	40.8382	-9.64e-05	-2.25e-05
solcap_snp_sl_41286	1	16.8103	1	40.8382	-9.64e-05	-2.25e-05
solcap_snp_sl_16925	1	18.5193	1	40.8382	-0.0126973	-0.00699919
solcap_snp_sl_41282	1	18.5233	1	40.8382	-2.94e-17	5.2e-18
solcap_snp_sl_51462	1	19.49	1	40.8382	2.95e-17	3.17e-18
solcap_snp_sl_51466	1	26.8519	1	40.8382	1.41e-16	1.87e-16
solcap_snp_sl_51469	1	26.8523	1	40.8382	-4.34e-17	-1.54e-16
solcap_snp_sl_66077	1	32.8507	1	40.8382	-9.64e-05	-2.25e-05
solcap_snp_sl_51990	1	33.6838	1	40.8382	-9.64e-05	-2.25e-05
solcap_snp_sl_51992	1	33.9064	1	40.8382	-9.64e-05	-2.25e-05
solcap_snp_sl_56061	1	35.6496	1	40.8382	-1.43e-16	-1.29e-16
solcap_snp_sl_25971	1	35.6528	2	1.0938	-0.000775876	0.000710752	x
solcap_snp_sl_52623	1	37.5484	1	40.8382	8.89e-18	2.22e-16
solcap_snp_sl_19068	1	38.2763	1	40.8382	-0.012201	-0.006777
solcap_snp_sl_52641	1	38.3216	1	40.8382	-9.64e-05	-2.25e-05
solcap_snp_sl_52646	1	39.1418	1	40.8382	-9.64e-05	-2.25e-05
solcap_snp_sl_41433	1	40.683	1	40.8382	-9.64e-05	-2.25e-05
solcap_snp_sl_41438	1	40.9099	1	40.8382	-9.64e-05	-2.25e-05
SL10106_923	1	41.8699	1	40.8382	-0.000192671	-4.12e-05
solcap_snp_sl_41445	1	42.5287	1	40.8382	-9.64e-05	-2.25e-05
solcap_snp_sl_39021	1	46.1956	1	40.8382	-9.64e-05	-2.25e-05
solcap_snp_sl_16520	1	46.5438	1	40.8382	-0.0129377	-0.00722989
solcap_snp_sl_39018	1	46.552	1	40.8382	-2.54e-17	-4.53e-18
solcap_snp_sl_70304	1	47.929	1	40.8382	-9.64e-05	-2.25e-05
solcap_snp_sl_70307	1	48.8349	1	40.8382	-6e-17	-7.13e-17
solcap_snp_sl_70309	1	49.1923	1	40.8382	-9.64e-05	-2.25e-05
solcap_snp_sl_70310	1	49.4497	1	40.8382	-9.64e-05	-2.25e-05
solcap_snp_sl_70311	1	49.8888	1	40.8382	-9.64e-05	-2.25e-05
solcap_snp_sl_70312	1	50.7656	1	40.8382	-9.64e-05	-2.25e-05
solcap_snp_sl_70320	1	51.2707	1	40.8382	-9.64e-05	-2.25e-05
solcap_snp_sl_22423	1	52.3367	1	40.8382	-0.0129377	-0.00722989
solcap_snp_sl_70323	1	52.3367	1	40.8382	7.81e-17	1.99e-16
solcap_snp_sl_70327	1	52.7316	1	40.8382	-9.64e-05	-2.25e-05
solcap_snp_sl_70332	1	54.5088	1	40.8382	-9.64e-05	-2.25e-05
solcap_snp_sl_70337	1	56.5225	1	40.8382	-1.05e-16	-1.09e-16
solcap_snp_sl_70344	1	57.0662	1	40.8382	-9.64e-05	-2.25e-05
solcap_snp_sl_70345	1	57.2229	1	40.8382	-4.04e-17	2.44e-17
solcap_snp_sl_70348	1	58.3421	1	40.8382	1.05e-16	1.76e-17
solcap_snp_sl_70365	1	59.3842	1	40.8382	-9.64e-05	-2.25e-05
solcap_snp_sl_70371	1	60.822	1	40.8382	-9.64e-05	-2.25e-05
solcap_snp_sl_38790	1	61.4784	1	40.8382	-9.64e-05	-2.25e-05
solcap_snp_sl_16466	1	61.7253	1	40.8382	-0.0122204	-0.00680314
solcap_snp_sl_38771	1	62.4944	1	40.8382	-9.64e-05	-2.25e-05
solcap_snp_sl_18635	1	67.0378	1	41.1144	-0.0117144	-0.00600393
solcap_snp_sl_18634	1	67.3664	1	41.3907	-0.0132901	-0.00708021
solcap_snp_sl_50589	1	67.4841	1	41.3907	-9.64e-05	-2.25e-05
solcap_snp_sl_18627	1	67.5123	1	41.3907	-0.0151347	-0.00802143
solcap_snp_sl_50576	1	67.7401	1	41.3907	4.09e-17	5.34e-17
solcap_snp_sl_13762	1	67.8555	1	41.6669	-0.00986237	0.0130006
solcap_snp_sl_50561	1	68.1051	1	41.6669	-9.64e-05	-2.25e-05
solcap_snp_sl_50542	1	68.27	1	42.2192	-9.64e-05	-2.25e-05
solcap_snp_sl_30135	1	68.7479	1	43.8773	-0.00365277	-0.00234977
solcap_snp_sl_50495	1	68.9443	1	44.7014	-9.64e-05	-2.25e-05
solcap_snp_sl_50477	1	69.0778	1	44.7014	-0.000192828	-4.51e-05
solcap_snp_sl_50467	1	69.2317	1	45.2536	-0.000192828	-4.51e-05
solcap_snp_sl_50464	1	69.3339	1	45.8057	-0.000192828	-4.51e-05
solcap_snp_sl_50458	1	69.46	1	46.0769	-0.000192828	-4.51e-05
solcap_snp_sl_50427	1	69.75	1	46.9009	-0.000192828	-4.51e-05
solcap_snp_sl_30111	1	70.0923	1	47.7247	-0.000617236	4.15e-07
SL20127_1427	1	70.1044	1	47.7247	-0.000192828	-4.51e-05
solcap_snp_sl_50373	1	70.2213	1	47.9959	-0.00022205	-0.000156727
solcap_snp_sl_36902	1	70.3644	1	60.3706	0.00641954	0.00156917
solcap_snp_sl_70031	1	70.4277	1	60.3706	0.00641954	0.00156917
Le005879_466	1	70.5173	1	60.9221	0.00711268	0.00152982
SL10483_141	1	70.5207	1	60.9221	0.00689808	0.00157492
solcap_snp_sl_36963	1	70.5798	1	61.1933	0.00713544	0.00159488
solcap_snp_sl_37999	1	70.6813	1	48.5478	-4.43e-17	9.73e-17
solcap_snp_sl_25914	1	70.8684	1	50.4828	-0.000192828	-4.51e-05
solcap_snp_sl_38059	1	71.0113	1	50.4828	-0.000192828	-4.51e-05
solcap_snp_sl_38078	1	71.0878	1	50.754	-0.000192828	-4.51e-05
solcap_snp_sl_456	1	71.0906	1	51.0252	-0.0137159	0.0282157
solcap_snp_sl_457	1	71.1866	1	51.8488	-0.0212383	0.0265519
solcap_snp_sl_25922	1	71.4237	1	52.4005	-0.00067509	-0.000409257
solcap_snp_sl_38123	1	71.4768	1	52.4005	-0.0135271	0.0318831
solcap_snp_sl_38126	1	71.4783	1	52.4005	-0.000192828	-4.51e-05
solcap_snp_sl_25926	1	71.6423	1	52.6717	-0.000428445	-0.000182849
solcap_snp_sl_25931	1	71.7562	1	53.2234	-0.00783462	-0.0042396
solcap_snp_sl_38178	1	71.946	1	54.0468	-0.000428445	-0.000182849
solcap_snp_sl_38243	1	72.2685	1	55.9803	-0.000192828	-4.51e-05
solcap_snp_sl_38290	1	72.5285	1	57.0797	-2.36e-16	-7.91e-16
solcap_snp_sl_12350	1	72.6544	1	57.6343	-0.00997413	0.0375745
solcap_snp_sl_12352	1	72.6582	1	57.6343	-0.00987921	0.0376288
solcap_snp_sl_12355	1	72.6961	1	57.6343	-0.0102831	0.0370199
solcap_snp_sl_38324	1	72.7516	1	57.6343	-0.000192828	-4.51e-05
solcap_snp_sl_16331	1	72.7968	1	58.4576	-0.00766119	-0.00780105
solcap_snp_sl_12359	1	72.8004	1	58.4576	-0.00751763	-0.00729637
solcap_snp_sl_530	1	72.9963	1	58.7288	-0.0067619	-0.00495829
solcap_snp_sl_38389	1	73.2228	1	59	0.00555867	0.0036945
solcap_snp_sl_38390	1	73.2331	1	59	0.00555867	0.0036945
solcap_snp_sl_38406	1	73.3142	1	59.2713	0.00124583	0.00288701
solcap_snp_sl_27286	1	73.4618	1	61.4676	0.00136555	0.00292642
solcap_snp_sl_36715	1	73.5135	1	61.1933	0.00395509	0.00194368
solcap_snp_sl_27345	1	73.6495	1	62.579	0.000521193	0.00345547
solcap_snp_sl_42191	1	73.8895	1	65.3844	0.000941905	0.00248114
solcap_snp_sl_27382	1	73.8899	1	65.3844	0.00117469	0.00260506
solcap_snp_sl_27400	1	73.9678	1	65.3844	0.00117469	0.00260506
solcap_snp_sl_27452	1	74.2092	1	65.6571	0.00172998	0.00319469
solcap_snp_sl_1813	1	74.2824	1	65.9299	0.00511377	0.000706235
solcap_snp_sl_1814	1	74.2896	1	65.9299	0.00795399	-0.000525612
Le010791_85_solcap_snp_sl_42212	1	74.3098	1	67.0291	0.00152923	0.00314476
solcap_snp_sl_42213	1	74.3135	1	67.0291	0.0087394	0.00343957
solcap_snp_sl_17063	1	74.3147	1	67.0291	-0.0109793	-0.00709302
solcap_snp_sl_17072	1	74.3608	1	67.8523	-0.0114486	-0.00735967
solcap_snp_sl_27505	1	74.3615	1	67.8523	0.00172998	0.00319469
solcap_snp_sl_17073	1	74.4816	1	68.4037	-0.00425706	-0.00263101
solcap_snp_sl_17076	1	74.5155	1	68.4037	-0.0126684	-0.00819625
solcap_snp_sl_17080	1	74.5463	1	68.4037	-0.0103266	-0.00670026
solcap_snp_sl_27556	1	74.6434	1	68.9613	-0.000109159	-0.000204041
solcap_snp_sl_27588	1	74.8454	1	69.5127	-0.000219533	-0.000153299
solcap_snp_sl_27605	1	75.0525	1	70.3359	-0.000312732	0.000252954
solcap_snp_sl_27629	1	75.1775	1	71.435	-0.000312732	0.000252954
SGN-U585636_snp200_solcap_snp_sl_26254	1	75.34	1	71.7062	-0.000312732	0.000252954
solcap_snp_sl_26248	1	75.362	1	71.7062	-0.000312732	0.000252954
solcap_snp_sl_16393	1	75.5631	1	72.2576	-0.00780533	-0.00339477
solcap_snp_sl_16389	1	75.5774	1	72.2576	-0.0075715	-0.00327025
SL10943_357	1	75.5904	1	72.2576	-0.000312732	0.000252954
solcap_snp_sl_34452	1	76.1158	1	74.7496	0.000518167	-0.000243221
solcap_snp_sl_34461	1	76.1723	1	75.8488	0.000736419	-0.000327914
solcap_snp_sl_34512	1	76.5286	1	77.2245	0.000736419	-0.000327914
solcap_snp_sl_34513	1	76.5287	1	77.2245	0.000518167	-0.000243221
solcap_snp_sl_34515	1	76.5289	1	77.2245	0.000518167	-0.000243221
solcap_snp_sl_34522	1	76.5639	1	77.4972	0.000518167	-0.000243221
solcap_snp_sl_63558	1	76.6004	1	77.4972	0.000967617	-0.000417612
solcap_snp_sl_34545	1	76.7372	1	78.3202	0.00027821	-0.000150698
solcap_snp_sl_9755	1	76.8954	1	78.5914	0.0139747	-0.0233313
solcap_snp_sl_9756	1	76.8973	1	78.5914	0.0135297	-0.0239567
solcap_snp_sl_9758	1	76.9019	1	78.5914	0.0111683	-0.0253444
Cd2_2755_solcap_snp_sl_34581	1	76.9835	1	79.1458	0.00027821	-0.000150698
solcap_snp_sl_34596	1	77.0744	1	79.1458	-0.000336483	0.000411413
solcap_snp_sl_15339	1	77.1124	1	79.6971	-0.0150034	0.0338412
solcap_snp_sl_34622	1	77.1865	1	79.9683	-0.000336483	0.000411413
solcap_snp_sl_27784	1	77.3516	1	80.2396	-0.000336483	0.000411413
solcap_snp_sl_27832	1	77.6628	1	81.6151	-0.000226109	0.000360671
solcap_snp_sl_27859	1	77.7486	1	81.8864	-0.000226109	0.000360671
solcap_snp_sl_2202	1	77.916	1	82.7093	-0.000857433	0.0346265
solcap_snp_sl_27904	1	77.9587	1	82.9806	-0.000365233	0.00102299
solcap_snp_sl_27908	1	77.9596	1	82.9806	-0.000365233	0.00102299
SL10945_281	1	78.091	1	82.9806	-0.000226109	0.000360671
solcap_snp_sl_27964	1	78.1773	1	83.2518	-0.000226109	0.000360671
solcap_snp_sl_2218	1	78.31	1	83.5245	-0.0114936	0.0126369
solcap_snp_sl_43655	1	78.3558	1	83.5245	-0.000226109	0.000360671
solcap_snp_sl_2234	1	78.5251	1	83.5245	-0.00937983	0.00457713
solcap_snp_sl_28023	1	78.5849	1	84.3476	-0.000226109	0.000360671
solcap_snp_sl_28057	1	78.6936	1	84.6188	0.000388584	-0.00020144
CL016805-0261	1	78.8264	1	85.4418	0.00245674	0.0011166
solcap_snp_sl_28099	1	78.8431	1	85.713	0.0024551	0.00113869
solcap_snp_sl_28168	1	79.0805	1	86.812	-8.33e-18	1.52e-17
solcap_snp_sl_28173	1	79.095	1	86.812	-0.000614694	0.000562111
SGN-U585738_snp404_solcap_snp_sl_43712	1	79.1522	1	86.812	-0.000508006	0.00020708
solcap_snp_sl_28225	1	79.3525	1	87.3634	-0.000510788	0.000205604
solcap_snp_sl_28247	1	79.4639	1	87.6346	5.28e-17	4.82e-17
CL016510-0445	1	79.4822	1	87.6346	-0.000508006	0.00020708
solcap_snp_sl_43786	1	79.7662	1	89.5661	-0.000566057	0.000662867
solcap_snp_sl_43796	1	79.8479	1	89.8373	-5.39e-05	0.000457969
solcap_snp_sl_43843	1	80.0004	1	91.213	-5.39e-05	0.000457969
SGN-U314898_snp260	1	80.0012	1	91.213	-5.39e-05	0.000457969
solcap_snp_sl_43857	1	80.0742	1	91.213	3.25e-17	3.73e-17
ZDS_Promoter_SNP1	1	80.2857	1	91.213	-2.6e-18	-8.33e-19
solcap_snp_sl_43902	1	80.2898	1	91.213	-5.39e-05	0.000457969
solcap_snp_sl_17351	1	80.4803	1	91.7644	-0.00505257	-0.00320514
solcap_snp_sl_44009	1	80.7335	1	93.4177	-0.000150352	0.000435434
solcap_snp_sl_44048	1	80.9615	1	94.2408	-0.000123383	0.00020645
solcap_snp_sl_44147	1	81.2436	1	95.0639	-5.39e-05	0.000457969
solcap_snp_sl_28287	1	81.333	1	95.0639	-0.00110422	0.000223108
solcap_snp_sl_44190	1	81.427	1	95.0639	-5.39e-05	0.000457969
solcap_snp_sl_44213	1	81.5661	1	95.6153	0.000465296	0.000353373
CL017666-0495	1	81.6635	1	96.4385	0.000465296	0.000353373
solcap_snp_sl_44266	1	81.7019	1	96.4385	0.000465296	0.000353373
solcap_snp_sl_44305	1	81.8082	1	96.7097	0.000368883	0.000330838
solcap_snp_sl_2438	1	81.8724	1	97.5329	-0.00213474	-0.0150909
solcap_snp_sl_2440	1	81.8738	1	97.5329	-0.00314359	-0.0155538
solcap_snp_sl_2452	1	81.9885	1	98.0843	-0.00498453	-0.00380736
solcap_snp_sl_2455	1	81.9923	1	98.0843	-0.00481115	-0.00370608
solcap_snp_sl_2457	1	82.001	1	98.0843	-0.00475047	-0.00367739
CL017306-0367_solcap_snp_sl_44383	1	82.1316	1	98.0843	0.000465296	0.000353373
CL015829-0286_solcap_snp_sl_44451	1	82.3294	1	98.6357	0.000465296	0.000353373
solcap_snp_sl_44461	1	82.4045	1	98.6357	9.88e-05	0.000172571
solcap_snp_sl_2504	1	82.4229	1	99.1871	-0.00236755	-0.00226272
solcap_snp_sl_2508	1	82.429	1	99.1871	-0.00236755	-0.00226272
solcap_snp_sl_2509	1	82.4327	1	99.1871	-0.00102549	-0.00044798
solcap_snp_sl_44465	1	82.4398	1	99.1871	-0.00105442	-0.000463561
solcap_snp_sl_2510	1	82.4398	1	99.1871	-0.0024176	-0.00228928
solcap_snp_sl_44470	1	82.5037	1	99.4583	0.000465296	0.000353373
SGN-U571854_snp167_solcap_snp_sl_44482	1	82.5928	1	100.558	-0.000246766	0.000412899
solcap_snp_sl_40061	1	83.223	1	102.214	0.000216131	6.19e-05
solcap_snp_sl_40076	1	83.278	1	102.214	0.000312545	8.45e-05
solcap_snp_sl_40154	1	83.5174	1	102.487	-0.000370113	-0.000329385
solcap_snp_sl_40177	1	83.6513	1	103.587	0.000312545	8.45e-05
solcap_snp_sl_40199	1	83.8045	1	103.587	0.000312545	8.45e-05
solcap_snp_sl_40219	1	83.914	1	103.858	0.000312545	8.45e-05
CL015751-0365	1	84.0312	1	104.129	0.000312545	8.45e-05
CL016719-0209_solcap_snp_sl_40301	1	84.2367	1	104.952	-0.00151008	-0.00101381
solcap_snp_sl_40303	1	84.239	1	104.952	8.76e-05	-3.49e-05
solcap_snp_sl_40309	1	84.2537	1	104.952	0.000312545	8.45e-05
solcap_snp_sl_40364	1	84.4054	1	106.052	0.000312545	8.45e-05
SGN-U576068_snp460_solcap_snp_sl_40366	1	84.4058	1	106.052	-0.0126416	-0.00856354
solcap_snp_sl_40410	1	84.6969	1	106.876	0.000312545	8.45e-05
solcap_snp_sl_40488	1	85.061	1	107.975	-0.000520465	0.000106049
solcap_snp_sl_40498	1	85.0976	1	107.975	0.000162193	0.000519918
solcap_snp_sl_40527	1	85.2339	1	107.975	0.000258607	0.000542453
solcap_snp_sl_26879	1	85.2362	1	107.975	-0.00786539	-0.00445253
solcap_snp_sl_40571	1	85.4629	1	108.799	0.000258607	0.000542453
solcap_snp_sl_40586	1	85.589	1	109.07	-0.00482334	-0.000245051
CL016564-0236_solcap_snp_sl_40595	1	85.6599	1	109.346	0.000258607	0.000542453
solcap_snp_sl_36725	1	85.7446	1	109.622	-0.0166749	-0.00718642
CL017342-0410	1	85.7992	1	109.893	0.000258607	0.000542453
solcap_snp_sl_54525	1	86.0203	1	112.094	-5.66e-05	0.000457352
3284_1_60_solcap_snp_sl_54547	1	86.1222	1	112.365	-0.00890888	-0.0100483
solcap_snp_sl_54589	1	86.3111	1	114.019	0.000162193	0.000519918
C2_At1g50020_1125c	1	86.3184	1	114.019	-5.39e-05	0.000457969
solcap_snp_sl_54622	1	86.4664	1	115.125	0.000162193	0.000519918
solcap_snp_sl_6718	1	86.4843	1	115.125	-0.00799406	-0.0103374
CL015970-0397_solcap_snp_sl_54631	1	86.4867	1	115.125	0.000254408	0.000541474
solcap_snp_sl_54669	1	86.652	1	115.68	0.000258607	0.000542453
solcap_snp_sl_19481	1	86.711	1	115.951	-0.013817	-0.0069861
solcap_snp_sl_54685	1	86.7569	1	115.951	0.000258607	0.000542453
SGN-U580895_snp1396_solcap_snp_sl_54697	1	86.8131	1	116.222	-0.00125066	0.00166201
solcap_snp_sl_54704	1	86.8288	1	116.222	0.000258607	0.000542453
CL009130-0498	1	86.8695	1	116.222	0.00457784	-0.00484567
CL009293-0681	1	86.8831	1	116.222	0.00454551	-0.00494854
solcap_snp_sl_54730	1	86.9647	1	117.045	-5.39e-05	0.000457969
solcap_snp_sl_54731	1	86.9654	1	117.045	-5.39e-05	0.000457969
solcap_snp_sl_54732	1	86.9793	1	117.045	-5.39e-05	0.000457969
CL016668-0365	1	87.0425	1	117.045	-5.39e-05	0.000457969
solcap_snp_sl_54758	1	87.0576	1	117.045	-0.000150352	0.000435434
solcap_snp_sl_54783	1	87.1931	1	117.317	-5.39e-05	0.000457969
solcap_snp_sl_54854	1	87.5069	1	118.416	0.000330735	0.000213384
solcap_snp_sl_54883	1	87.5318	1	118.416	0.000330735	0.000213384
solcap_snp_sl_48338	1	87.6418	1	118.968	-2.18e-18	-1.82e-18
solcap_snp_sl_48336	1	87.643	1	118.968	-9.64e-05	-2.25e-05
C2_At2g15890_430_b	1	87.7982	1	120.344	-0.000210518	0.000626601
solcap_snp_sl_13404	1	87.9779	1	120.896	0.0133591	-0.0328532
solcap_snp_sl_29388	1	87.9782	1	120.896	0.0129475	-0.0321379
solcap_snp_sl_48274	1	87.9783	1	120.896	-0.0130421	0.0324813
solcap_snp_sl_13399	1	88.0118	1	121.167	0.0150472	-0.0310859
solcap_snp_sl_13398	1	88.0386	1	121.167	0.0156169	-0.0307713
solcap_snp_sl_48255	1	88.0718	1	121.167	-8.47e-18	-5.27e-18
solcap_snp_sl_48243	1	88.1091	1	121.438	-0.000556949	0.000185293
solcap_snp_sl_48237	1	88.1318	1	121.438	-0.000691604	0.000848651
solcap_snp_sl_48209	1	88.2696	1	121.438	-0.000547611	0.000774149
solcap_snp_sl_48181	1	88.4018	1	122.261	-0.00039719	0.000114467
solcap_snp_sl_48179	1	88.4179	1	122.533	9.61e-05	0.00038454
SGN-U581692_snp378	1	88.4302	1	122.533	-5.8e-05	0.000456587
solcap_snp_sl_48151	1	88.5612	1	124.187	0.000100348	0.000385554
solcap_snp_sl_48121	1	88.6657	1	124.187	-0.0017545	0.00272375
solcap_snp_sl_48097	1	88.8722	1	125.287	-0.00186191	0.00257049
solcap_snp_sl_48077	1	88.934	1	125.287	-0.000256941	-8.39e-05
solcap_snp_sl_48043	1	89.1884	1	125.838	-0.00169819	-0.000758366
solcap_snp_sl_50683	1	89.2	1	125.838	-0.000555531	-0.000242966
SGN-U573826_snp1014_solcap_snp_sl_53877	1	89.2226	1	125.838	-0.00104438	-0.000508207
solcap_snp_sl_53871	1	89.2245	1	125.838	-0.000800162	-0.000432026
solcap_snp_sl_53870	1	89.2246	1	125.838	-0.00136827	-0.000681788
solcap_snp_sl_53864	1	89.2517	1	125.838	-0.00179486	-0.000987065
solcap_snp_sl_53862	1	89.2541	1	125.838	-0.00106948	-0.000357585
SGN-U313729_snp305	1	89.2571	1	125.838	-0.00175826	-0.000890466
CL016082-0560	1	89.2726	1	125.838	-0.00139822	-0.000977457
solcap_snp_sl_53846	1	89.2999	1	125.838	-0.00051077	-0.000242867
solcap_snp_sl_53812	1	89.407	1	126.389	5.69e-05	-9.55e-05
SGN-U581283_snp1102_solcap_snp_sl_53749	1	89.6285	1	126.66	-0.000884316	-0.000642027
solcap_snp_sl_53743	1	89.6384	1	126.66	-0.000884316	-0.000642027
SGN-U581138_snp1171_solcap_snp_sl_53721	1	89.7557	1	126.66	-0.00113236	-0.000819645
CL015806-0417_solcap_snp_sl_53692	1	89.8511	1	126.932	-0.000343252	-0.000343502
solcap_snp_sl_53671	1	89.9303	1	127.483	-0.000343252	-0.000343502
solcap_snp_sl_53654	1	89.9813	1	127.483	-0.000789913	-0.000425931
solcap_snp_sl_53630	1	90.0907	1	127.483	-0.000634623	-0.000497799
solcap_snp_sl_53612	1	90.1728	1	127.483	0	0
solcap_snp_sl_7398	2	1.51176	2	0	-0.000139341	0.00113401
SL10351_878	2	1.57983	2	0	-0.000139341	0.00113401
solcap_snp_sl_7408	2	2.06998	2	0	-0.000139341	0.00113401
solcap_snp_sl_56941	2	2.07823	2	0	-1.6e-05	2.94e-05
solcap_snp_sl_56942	2	2.08811	2	0	-0.000139341	0.00113401
solcap_snp_sl_56943	2	2.08818	2	0	-0.00118378	0.000434159
solcap_snp_sl_44550	2	6.13844	2	0	-0.000131308	0.00109939
solcap_snp_sl_28320	2	6.13964	2	0	-0.000139341	0.00113401
solcap_snp_sl_2559	2	6.28328	2	0	-0.0012078	0.000418642
solcap_snp_sl_2561	2	6.51928	2	0	-0.000154293	0.00112568
solcap_snp_sl_2563	2	6.57045	2	0	-0.000139341	0.00113401
solcap_snp_sl_2564	2	6.5723	2	0	-0.000139341	0.00113401
solcap_snp_sl_2565	2	6.5801	2	0	-0.000139341	0.00113401
solcap_snp_sl_2570	2	6.5973	2	0	-0.000139341	0.00113401
solcap_snp_sl_2572	2	6.59988	2	0	-0.000139341	0.00113401
solcap_snp_sl_44555	2	6.61013	2	0	-0.000139341	0.00113401
solcap_snp_sl_2575	2	6.61029	2	0	-0.000139341	0.00113401
solcap_snp_sl_2580	2	6.91221	2	0	-0.000233461	0.000678693
solcap_snp_sl_2590	2	6.94174	2	0	-0.000119207	0.00110319
solcap_snp_sl_2591	2	6.94174	2	0	-0.000139341	0.00113401
solcap_snp_sl_28328	2	7.83111	2	0	-4.29e-05	0.00115654
solcap_snp_sl_28329	2	7.84758	2	0	-0.000139341	0.00113401
solcap_snp_sl_28335	2	8.1389	2	0	-0.000139341	0.00113401
solcap_snp_sl_28337	2	8.85335	2	0	-0.000147939	0.00112858
solcap_snp_sl_28338	2	8.85347	2	0	-0.00235905	0.00015486
solcap_snp_sl_44564	2	9.17244	2	0	-0.000112367	0.00045227
solcap_snp_sl_2600	2	9.17448	2	0	-0.000139341	0.00113401
solcap_snp_sl_28340	2	9.57634	2	0	-0.000112367	0.00045227
solcap_snp_sl_28343	2	9.86692	2	0	-0.000139341	0.00113401
solcap_snp_sl_2607	2	10.4234	2	0	-0.000139341	0.00113401
solcap_snp_sl_6249	2	11.083	2	0	-0.000139341	0.00113401
solcap_snp_sl_6247	2	11.0832	2	0	-0.000139341	0.00113401
solcap_snp_sl_6240	2	12.0141	2	0	-0.000147939	0.00112858
solcap_snp_sl_6239	2	12.0163	2	0	-0.000139341	0.00113401
solcap_snp_sl_31193	2	12.2782	2	0	-0.000139341	0.00113401
solcap_snp_sl_31192	2	12.9219	2	0	-0.000112367	0.00045227
solcap_snp_sl_31191	2	12.9219	2	0	-0.000139341	0.00113401
solcap_snp_sl_31190	2	12.922	2	0	-0.000139341	0.00113401
solcap_snp_sl_31189	2	12.9406	2	0	-0.000139341	0.00113401
solcap_snp_sl_53126	2	13.1042	2	0	-0.000139341	0.00113401
solcap_snp_sl_6229	2	13.1349	2	0	-0.000139341	0.00113401
solcap_snp_sl_6228	2	13.135	2	0	-0.000139341	0.00113401
solcap_snp_sl_6227	2	13.135	2	0	-0.000139341	0.00113401
solcap_snp_sl_6226	2	13.2228	2	0	-0.00208721	0.000314287
solcap_snp_sl_31179	2	13.4224	2	0	-0.000112367	0.00045227
solcap_snp_sl_6206	2	13.4291	2	0	-0.000139341	0.00113401
solcap_snp_sl_6201	2	13.877	2	0	-0.000139341	0.00113401
solcap_snp_sl_6199	2	13.8858	2	0	-0.000139341	0.00113401
solcap_snp_sl_6195	2	13.9054	2	0	-0.000139341	0.00113401
solcap_snp_sl_6194	2	13.9054	2	0	-0.000139341	0.00113401
solcap_snp_sl_6192	2	13.9084	2	0	-0.000147939	0.00112858
solcap_snp_sl_6189	2	13.9501	2	0	-0.000139341	0.00113401
solcap_snp_sl_6185	2	14.0166	2	0	-0.000147939	0.00112858
solcap_snp_sl_6184	2	14.0173	2	0	-0.000139341	0.00113401
solcap_snp_sl_6183	2	14.0417	2	0	-0.000139341	0.00113401
solcap_snp_sl_53120	2	14.0699	2	0	-0.000139341	0.00113401
solcap_snp_sl_6180	2	14.294	2	0	-0.000139341	0.00113401
solcap_snp_sl_6177	2	14.3326	2	0	-0.000139341	0.00113401
solcap_snp_sl_6176	2	14.3326	2	0	-0.000139341	0.00113401
solcap_snp_sl_1379	2	14.9811	2	0	-0.000139341	0.00113401
solcap_snp_sl_1380	2	14.9833	2	0	-0.000139341	0.00113401
solcap_snp_sl_40819	2	14.9835	2	0	-0.000139341	0.00113401
solcap_snp_sl_1381	2	14.9836	2	0	-0.000139341	0.00113401
solcap_snp_sl_1382	2	14.9837	2	0	-0.00186219	0.000474063
solcap_snp_sl_1383	2	14.9845	2	0	-0.00017829	0.00127538
solcap_snp_sl_1384	2	14.9861	2	0	-0.000139341	0.00113401
solcap_snp_sl_1385	2	14.9861	2	0	-0.000139341	0.00113401
solcap_snp_sl_1386	2	15.1285	2	0	-0.000139341	0.00113401
solcap_snp_sl_40823	2	15.1834	2	0	-0.000113083	0.000470864
solcap_snp_sl_5885	2	15.3848	2	0	-0.000139341	0.00113401
solcap_snp_sl_31002	2	15.3849	2	0	-0.000139341	0.00113401
solcap_snp_sl_52609	2	15.4021	2	0	-0.000139341	0.00113401
solcap_snp_sl_52608	2	15.4153	2	0	-0.000139341	0.00113401
solcap_snp_sl_5884	2	15.4223	2	0	-0.000147939	0.00112858
solcap_snp_sl_5883	2	15.4235	2	0	-0.000139341	0.00113401
solcap_snp_sl_5882	2	15.4968	2	0	-0.000139341	0.00113401
solcap_snp_sl_5881	2	15.4969	2	0	-0.000139341	0.00113401
solcap_snp_sl_5879	2	15.504	2	0	-0.000139341	0.00113401
solcap_snp_sl_5875	2	15.5725	2	0	-0.000147939	0.00112858
solcap_snp_sl_5872	2	15.631	2	0	-0.000139341	0.00113401
solcap_snp_sl_5871	2	15.6311	2	0	-0.000219802	0.000636667
solcap_snp_sl_11572	2	15.6992	2	0	-0.000139341	0.00113401
solcap_snp_sl_7416	2	16.1888	2	0	-0.000139341	0.00113401
solcap_snp_sl_56944	2	16.5775	2	0	-0.000139341	0.00113401
solcap_snp_sl_7413	2	16.5844	2	0	-0.000139341	0.00113401
Le005962_147	2	17.479	2	0	-0.000139341	0.00113401
solcap_snp_sl_30414	2	17.6305	2	0	-0.000147939	0.00112858
solcap_snp_sl_5306	2	17.6305	2	0	-0.000139341	0.00113401
solcap_snp_sl_30413	2	17.6323	2	0	-0.000139341	0.00113401
solcap_snp_sl_30412	2	17.6536	2	0	-0.000147939	0.00112858
solcap_snp_sl_51537	2	17.7554	2	0	-0.000139341	0.00113401
solcap_snp_sl_5305	2	17.7558	2	0	-0.000139341	0.00113401
solcap_snp_sl_5304	2	17.7561	2	0	5.11e-05	0.00117756
solcap_snp_sl_5303	2	17.7563	2	0	5.35e-05	0.00117908
solcap_snp_sl_5301	2	17.7788	2	0	5.35e-05	0.00117908
solcap_snp_sl_5300	2	17.7897	2	0	-0.000139341	0.00113401
solcap_snp_sl_5299	2	17.7901	2	0	-0.000147939	0.00112858
solcap_snp_sl_30408	2	17.798	2	0	-7.79e-05	0.000581495
solcap_snp_sl_5293	2	17.8009	2	0	-0.000139341	0.00113401
solcap_snp_sl_5285	2	17.9319	2	0	-0.000139341	0.00113401
solcap_snp_sl_5283	2	18.2137	2	0	-0.000147939	0.00112858
solcap_snp_sl_30399	2	18.948	2	0	8.68e-05	0.000497154
solcap_snp_sl_51535	2	19.1934	2	0	-0.000112367	0.00045227
solcap_snp_sl_5268	2	19.2232	2	0	-0.000147939	0.00112858
solcap_snp_sl_51532	2	20.0692	2	0	-0.00162207	0.000161301
solcap_snp_sl_5261	2	20.1715	2	0	-0.000139341	0.00113401
solcap_snp_sl_5260	2	20.1715	2	0	-0.000139341	0.00113401
solcap_snp_sl_5256	2	20.1852	2	0	-0.000139341	0.00113401
solcap_snp_sl_1393	2	21.1871	2	0	-0.000139341	0.00113401
solcap_snp_sl_1391	2	21.2845	2	0	-0.000139341	0.00113401
solcap_snp_sl_12647	2	21.2851	2	0	0.00412285	0.00953731
solcap_snp_sl_1390	2	21.2851	2	0	-0.000139341	0.00113401
solcap_snp_sl_1388	2	21.3099	2	0	-0.000139341	0.00113401
solcap_snp_sl_26928	2	21.3106	2	0	-0.000112367	0.00045227
solcap_snp_sl_26923	2	21.5135	2	0.2712	-0.000572975	0.000195128
solcap_snp_sl_30473	2	21.6728	2	0.2712	-0.000572975	0.000195128
solcap_snp_sl_30479	2	21.6895	2	0.2712	8.05e-05	0.00049734
solcap_snp_sl_30482	2	21.765	2	0.2712	-0.000112367	0.00045227
solcap_snp_sl_56955	2	22.1987	2	0.5425	-0.000112367	0.00045227
solcap_snp_sl_32196	2	22.1992	2	0.5425	-0.000112367	0.00045227
solcap_snp_sl_944	2	24.1674	2	0	-0.000147939	0.00112858
solcap_snp_sl_2037	2	24.5392	2	0	-0.000139341	0.00113401
solcap_snp_sl_2031	2	25.7469	2	0	-0.000139341	0.00113401
solcap_snp_sl_2030	2	25.7471	2	0	-0.000139341	0.00113401
solcap_snp_sl_2029	2	25.7488	2	0	-0.000139341	0.00113401
solcap_snp_sl_2028	2	25.7489	2	0	-0.000139341	0.00113401
solcap_snp_sl_2027	2	25.749	2	0	-0.000139341	0.00113401
solcap_snp_sl_70009	2	26.9623	2	0	-0.000139341	0.00113401
solcap_snp_sl_36890	2	26.9623	2	0	-0.000139341	0.00113401
solcap_snp_sl_11803	2	26.9629	2	0	-0.000139341	0.00113401
solcap_snp_sl_11804	2	26.9776	2	0	-0.000139341	0.00113401
solcap_snp_sl_11805	2	26.9822	2	0	-0.000139341	0.00113401
solcap_snp_sl_70010	2	27.3692	2	0	-0.000112367	0.00045227
solcap_snp_sl_25966	2	27.9233	2	1.0938	9.68e-05	0.000468357
solcap_snp_sl_25974	2	28.1	2	1.0938	-0.000775876	0.000710752
SGN-U600984_snp332	2	28.3199	2	1.365	-0.000211018	-1.15e-05
solcap_snp_sl_26022	2	28.5561	2	2.188	-0.000889086	0.000271379
Le006654_46	2	28.7988	2	2.188	-0.000428478	0.000528521
solcap_snp_sl_26072	2	29.0958	2	2.188	-0.00761353	-0.00631132
solcap_snp_sl_38456	2	29.7927	2	3.5633	-0.000420112	0.000326957
solcap_snp_sl_26129	2	29.7928	2	3.5633	-0.000430208	0.000320583
solcap_snp_sl_26132	2	29.8476	2	3.5633	-0.000420112	0.000326957
solcap_snp_sl_38457	2	29.8477	2	3.5633	-0.000420112	0.000326957
solcap_snp_sl_26134	2	29.8504	2	3.5633	-0.000420112	0.000326957
solcap_snp_sl_26136	2	29.8519	2	3.5633	6.41e-05	0.000526324
solcap_snp_sl_26147	2	29.9425	2	3.5633	0	0
solcap_snp_sl_26158	2	30.0772	2	4.391	-3.27e-05	5.8e-05
solcap_snp_sl_26168	2	30.2195	2	4.9421	-0.000225577	1.29e-05
solcap_snp_sl_36312	2	30.2523	2	4.9421	-0.000225577	1.29e-05
solcap_snp_sl_22259	2	30.2824	2	4.9421	-0.00876388	-0.000120024
solcap_snp_sl_67542	2	30.301	2	4.9421	-0.00901357	-0.000314872
solcap_snp_sl_36484	2	30.3138	2	4.9421	-3.27e-05	5.8e-05
solcap_snp_sl_36448	2	30.6547	2	7.9911	-0.000192828	-4.51e-05
solcap_snp_sl_15707	2	30.7071	2	8.5421	-0.00845764	0.025318
solcap_snp_sl_36443	2	30.7457	2	8.8133	-0.00212052	0.0310737
solcap_snp_sl_15706	2	30.7458	2	8.8133	-0.00267674	0.0316126
Le009381_51	2	30.826	2	9.0845	-0.000192828	-4.51e-05
solcap_snp_sl_36420	2	31.0725	2	10.183	-0.000204318	-5.18e-05
solcap_snp_sl_36400	2	31.2745	2	10.734	-0.000414878	-0.000201797
SGN-U563909_snp1344_solcap_snp_sl_67508	2	31.4311	2	11.285	-0.000639869	-0.000321159
solcap_snp_sl_36373	2	31.4905	2	11.285	-0.000417818	-0.000164433
SGN-U571208_snp268	2	31.5014	2	11.285	-0.000192828	-4.51e-05
solcap_snp_sl_8384	2	31.5676	2	11.5563	0.00109878	-0.00366756
solcap_snp_sl_8386	2	31.7627	2	11.5563	0.000129382	-0.00357858
solcap_snp_sl_8389	2	31.766	2	11.5563	0.00050915	-0.0032283
solcap_snp_sl_8393	2	31.7672	2	11.5563	0.00027851	-0.0034433
solcap_snp_sl_8397	2	31.7689	2	11.5563	2.78e-06	-0.00347938
solcap_snp_sl_33205	2	31.7904	2	11.5563	0	0
solcap_snp_sl_20325	2	31.8215	2	11.5563	-0.0015674	-0.00468633
solcap_snp_sl_8402	2	31.8824	2	12.1073	-0.00220702	-0.00481025
Le017925_27_solcap_snp_sl_33223	2	31.8854	2	12.1073	-0.000192828	-4.51e-05
solcap_snp_sl_8405	2	31.8992	2	12.1073	-0.00293324	-0.00505796
solcap_snp_sl_8408	2	31.9066	2	12.1073	-0.00229944	-0.00473412
solcap_snp_sl_8409	2	31.9206	2	12.1073	-0.00151832	-0.00493953
SGN-U578164_snp2086	2	31.9417	2	12.1073	-0.000417818	-0.000164433
solcap_snp_sl_8421	2	31.9746	2	12.1073	-0.00859009	-0.00610849
solcap_snp_sl_33242	2	31.975	2	12.1073	-0.000192828	-4.51e-05
solcap_snp_sl_8426	2	31.9778	2	12.1073	-0.00847952	-0.00603059
solcap_snp_sl_20340	2	32.0185	2	12.6584	0.000273293	-0.0156082
solcap_snp_sl_20344	2	32.1433	2	12.9296	-0.00219672	0.000103349
solcap_snp_sl_33255	2	32.183	2	13.7573	-0.000192828	-4.51e-05
solcap_snp_sl_24721	2	32.2256	2	13.7573	0.00738379	-0.0117042
solcap_snp_sl_14946	2	32.2654	2	13.7573	0.00804437	-0.0156765
solcap_snp_sl_20358	2	32.2802	2	14.0285	0.00864786	-0.0148993
solcap_snp_sl_20361	2	32.3118	2	14.0285	0.00883065	-0.0152567
solcap_snp_sl_8439	2	32.3735	2	14.8563	0.0098648	-0.0182531
solcap_snp_sl_33302	2	32.4348	2	15.4074	0.000277634	-7.51e-05
Le005019_205	2	32.5296	2	15.6786	0.000163792	0.000135203
CL016491-0436_solcap_snp_sl_33330	2	32.6185	2	15.6786	0.000163792	0.000135203
solcap_snp_sl_14951	2	32.7074	2	16.7772	-0.0086445	0.00966992
solcap_snp_sl_33416	2	32.9948	2	20.397	0.000161516	0.000139402
CL016463-0326_solcap_snp_sl_33432	2	33.1212	2	20.9482	0.000161516	0.000139402
solcap_snp_sl_8464	2	33.1226	2	20.9482	-0.011363	0.00875305
solcap_snp_sl_33459	2	33.3402	2	21.2194	0.000354343	0.000184472
SGN-U315881_T1698_snp147	2	33.3578	2	21.2194	0.000161516	0.000139402
solcap_snp_sl_33469	2	33.3733	2	21.2194	0.000161516	0.000139402
Le001778_68_solcap_snp_sl_33474	2	33.5383	2	21.4907	0.00938922	-0.00472518
solcap_snp_sl_59619	2	33.6917	2	21.4907	0.00924064	-0.00461585
SGN-U574493_snp71	2	33.7532	2	21.7619	-0.000207628	-4.37e-05
CL017156-0308_solcap_snp_sl_33519	2	33.7613	2	21.7619	0.000259918	0.000604857
solcap_snp_sl_33524	2	33.7855	2	21.7619	0.000251638	0.000599661
SGN-U586107_snp378_solcap_snp_sl_33547	2	33.818	2	22.0331	0.000259918	0.000604857
SL20141_109_CL009129-0540_solcap_snp_sl_33558	2	33.8387	2	22.0331	0.000251638	0.000599661
solcap_snp_sl_33579	2	34.0032	2	22.5843	0.000510055	0.000558426
solcap_snp_sl_8505	2	34.034	2	22.857	-0.00956237	0.00989257
solcap_snp_sl_33595	2	34.1028	2	23.1298	0.0101435	-0.00496728
solcap_snp_sl_8512	2	34.1829	2	23.6809	-0.0181283	0.00488359
solcap_snp_sl_33611	2	34.235	2	23.9522	0.0104161	-0.00498632
CL017581-0470_solcap_snp_sl_33624	2	34.2867	2	24.7799	0.0125384	-0.0014131
solcap_snp_sl_33636	2	34.3887	2	24.7799	0.0123166	-0.00189856
CL005464-0069	2	34.507	2	25.6076	0	0
solcap_snp_sl_36037	2	34.6008	2	26.7061	0.0122173	-0.00250074
solcap_snp_sl_10567	2	34.6155	2	26.7061	-0.0169045	0.0132246
solcap_snp_sl_10564	2	34.6331	2	26.7061	0.0165954	-0.0131389
CL015660-0224_solcap_snp_sl_36017	2	34.6372	2	26.9773	0.0118787	-0.00248619
solcap_snp_sl_10563	2	34.6568	2	26.9773	0.00626239	-0.00436724
solcap_snp_sl_10557	2	34.6835	2	26.9773	0.00652929	-0.00569213
solcap_snp_sl_36004	2	34.6901	2	26.9773	0.0118455	-0.00248443
solcap_snp_sl_66052	2	34.8677	2	28.0759	0.012003	-0.00177448
CL009018-1241	2	34.8801	2	28.0759	0.0121151	-0.00179485
CL003810-0351	2	34.9126	2	28.9035	0.0119642	-0.00150875
SL10649_1116_solcap_snp_sl_35973	2	34.9239	2	29.4546	0.0123578	-0.00115974
solcap_snp_sl_35963	2	34.9612	2	29.7258	0.0122524	-0.00163018
solcap_snp_sl_35956	2	34.9744	2	29.7258	0.0120149	-0.00194519
solcap_snp_sl_35955	2	34.9763	2	29.7258	0.011462	-0.00357982
solcap_snp_sl_35954	2	34.978	2	29.7258	0.0130773	-0.00179274
solcap_snp_sl_35868	2	35.2968	2	30.8243	0.0112921	-0.00783687
SGN-U581789_snp1077_solcap_snp_sl_35846	2	35.3738	2	30.8243	0.0114582	-0.00830386
CL016381-0173_solcap_snp_sl_35845	2	35.3743	2	30.8243	0.0113372	-0.00808037
solcap_snp_sl_35844	2	35.3913	2	30.8243	0.0112819	-0.00828012
solcap_snp_sl_35821	2	35.4934	2	31.9229	0.00158094	-0.00312964
CL016680-0509	2	35.5518	2	31.9229	0.00172407	-0.00297143
solcap_snp_sl_25485	2	35.591	2	31.9229	0.0118647	-0.0118144
solcap_snp_sl_25482	2	35.6637	2	32.1941	0.0121876	-0.0121163
solcap_snp_sl_25481	2	35.6637	2	32.1941	0.0119391	-0.011791
solcap_snp_sl_25473	2	35.6979	2	32.1941	0.0119391	-0.011791
solcap_snp_sl_25472	2	35.701	2	32.1941	0.0120892	-0.0121401
solcap_snp_sl_35798	2	35.7067	2	32.1941	0.0120184	-0.0121644
solcap_snp_sl_25469	2	35.7126	2	32.1941	0.0115716	-0.0127373
solcap_snp_sl_25454	2	35.7878	2	32.1941	0.0116282	-0.0123972
solcap_snp_sl_25453	2	35.7976	2	32.4654	0.0121104	-0.0121418
solcap_snp_sl_35791	2	35.7988	2	32.4654	0.0116361	-0.0123578
solcap_snp_sl_25449	2	35.8017	2	32.4654	0.0123567	-0.0123403
solcap_snp_sl_25448	2	35.8027	2	32.4654	0.0127625	-0.0121024
solcap_snp_sl_25444	2	35.8761	2	32.7366	0.0121635	-0.0125998
solcap_snp_sl_25443	2	35.8775	2	32.7366	0.0121324	-0.0121845
solcap_snp_sl_25441	2	35.8875	2	32.7366	0.0120184	-0.0121644
solcap_snp_sl_25433	2	35.8903	2	32.7366	0.0120892	-0.0121401
solcap_snp_sl_25432	2	35.9041	2	32.7366	0.0125785	-0.0121474
solcap_snp_sl_35784	2	35.9142	2	32.7366	0.0118227	-0.0121373
solcap_snp_sl_35779	2	35.9493	2	32.7366	0.0111361	-0.0124338
solcap_snp_sl_35778	2	35.9496	2	32.7366	0.0115283	-0.0119175
solcap_snp_sl_35777	2	35.9619	2	32.7366	0.0117016	-0.0119133
SL10923_448	2	35.9706	2	32.7366	0.010946	-0.0117668
solcap_snp_sl_35776	2	35.9763	2	32.7366	0.0116331	-0.0119356
solcap_snp_sl_35774	2	35.9821	2	32.7366	0.0117016	-0.0119133
solcap_snp_sl_25427	2	35.9859	2	32.7366	0.0116967	-0.0120501
solcap_snp_sl_25422	2	35.9904	2	32.7366	0.0118887	-0.0125188
solcap_snp_sl_25421	2	35.9905	2	32.7366	0.0118137	-0.0120696
solcap_snp_sl_65977	2	35.9905	2	32.7366	0.0121394	-0.0120349
solcap_snp_sl_65976	2	36.0051	2	32.7366	0.0110827	-0.0120761
solcap_snp_sl_35771	2	36.0052	2	32.7366	0.0121368	-0.0123578
solcap_snp_sl_65975	2	36.0054	2	32.7366	0.0122081	-0.0123805
solcap_snp_sl_25420	2	36.0056	2	32.7366	0.0120338	-0.0120632
solcap_snp_sl_25418	2	36.0095	2	33.0078	0.0114316	-0.0119392
solcap_snp_sl_25417	2	36.0095	2	33.0078	0.0114316	-0.0119392
solcap_snp_sl_35770	2	36.0331	2	33.5588	0.0117116	-0.0121702
SGN-U149575_TG14_snp657	2	36.0548	2	33.5588	0.0118227	-0.0121373
solcap_snp_sl_25414	2	36.0579	2	33.5588	0.0115112	-0.0126177
solcap_snp_sl_35764	2	36.1033	2	33.5588	0.0119146	-0.0124615
solcap_snp_sl_25406	2	36.1394	2	33.5588	0.0123679	-0.0120583
solcap_snp_sl_25405	2	36.1713	2	33.5588	0.0124345	-0.0122178
solcap_snp_sl_25403	2	36.2037	2	33.5588	0.0125265	-0.0121953
solcap_snp_sl_25402	2	36.2039	2	33.5588	0.0130201	-0.0120188
solcap_snp_sl_35759	2	36.237	2	33.5588	0.0128525	-0.0117356
solcap_snp_sl_35758	2	36.2373	2	33.5588	0.0130201	-0.0120188
solcap_snp_sl_35757	2	36.282	2	33.5588	0.0130114	-0.0120072
SGN-U574837_snp399	2	36.2841	2	33.5588	0.0124703	-0.0121064
solcap_snp_sl_35755	2	36.299	2	34.1098	0.0130731	-0.0124768
solcap_snp_sl_25398	2	36.309	2	34.1098	0.012836	-0.0120639
solcap_snp_sl_35754	2	36.3091	2	34.1098	0.0130829	-0.0119758
solcap_snp_sl_35753	2	36.3094	2	34.1098	0.0128968	-0.0120496
SGN-U584790_snp107	2	36.3095	2	34.1098	0.012677	-0.0117263
solcap_snp_sl_49304	2	36.3655	2	34.1098	0.0129844	-0.0121728
solcap_snp_sl_23849	2	36.3657	2	34.1098	0.013096	-0.0121203
solcap_snp_sl_23850	2	36.4025	2	34.1098	0.00972626	0.00975
solcap_snp_sl_13513	2	36.4038	2	34.1098	0.0105135	0.00994965
solcap_snp_sl_13514	2	36.4047	2	34.1098	0.0103005	0.00978191
solcap_snp_sl_13516	2	36.4114	2	34.1098	0.0102804	0.0104518
solcap_snp_sl_13517	2	36.4118	2	34.1098	0.0102009	0.00990988
solcap_snp_sl_13518	2	36.4119	2	34.1098	0.0105306	0.0103558
solcap_snp_sl_13519	2	36.4119	2	34.1098	0.0103015	0.0104507
solcap_snp_sl_23851	2	36.4132	2	34.1098	0.0103068	0.0101954
solcap_snp_sl_13523	2	36.4226	2	34.1098	0.0106481	0.0100561
solcap_snp_sl_13526	2	36.4232	2	34.1098	0.010279	0.0101539
solcap_snp_sl_13527	2	36.4234	2	34.1098	0.0103552	0.00980037
solcap_snp_sl_13528	2	36.4237	2	34.1098	0.0101945	0.0103401
solcap_snp_sl_13529	2	36.4239	2	34.1098	0.0103632	0.0104258
solcap_snp_sl_13530	2	36.424	2	34.1098	0.0104254	0.0102406
solcap_snp_sl_13531	2	36.4251	2	34.1098	0.0102802	0.0105659
solcap_snp_sl_29520	2	36.4322	2	34.1098	0.0101462	0.0101576
solcap_snp_sl_13545	2	36.4421	2	34.1098	0.0104951	0.00985983
solcap_snp_sl_29521	2	36.4422	2	34.1098	0.0104254	0.0102406
solcap_snp_sl_13546	2	36.4455	2	34.1098	0.0102648	0.00981592
solcap_snp_sl_29522	2	36.4682	2	34.1098	0.010466	0.00681616
solcap_snp_sl_29523	2	36.4797	2	34.1098	0.0104045	0.0064773
solcap_snp_sl_13549	2	36.491	2	34.6609	0.0107353	0.00692641
solcap_snp_sl_13550	2	36.4911	2	34.6609	0.0109322	0.00699166
solcap_snp_sl_13552	2	36.4912	2	34.6609	0.0109322	0.00699166
solcap_snp_sl_23856	2	36.4914	2	34.6609	0.0106463	0.0061658
solcap_snp_sl_29524	2	36.4996	2	34.6609	0.0109074	0.00656228
solcap_snp_sl_23857	2	36.5197	2	34.6609	0.0109322	0.00699166
solcap_snp_sl_13555	2	36.5439	2	34.6609	0.0101853	0.00642428
solcap_snp_sl_13558	2	36.5593	2	34.6609	0.00938956	0.00591779
solcap_snp_sl_13559	2	36.5722	2	34.6609	0.0102189	0.00648994
solcap_snp_sl_29526	2	36.5978	2	34.9322	0.0100432	0.00589416
Le013093s_150	2	36.645	2	34.9322	0.00947009	0.00669355
solcap_snp_sl_13566	2	36.7411	2	35.2049	0.0105455	0.00647102
solcap_snp_sl_49312	2	36.7491	2	35.2049	0.0108158	0.00614073
solcap_snp_sl_13567	2	36.766	2	35.2049	0.0107608	0.00651359
solcap_snp_sl_29531	2	36.767	2	35.2049	0.0108218	0.00685628
SL10771_467	2	36.8046	2	35.4776	0.0106197	0.00612184
solcap_snp_sl_13574	2	36.8287	2	35.4776	0.0101799	0.00354009
solcap_snp_sl_13582	2	36.8717	2	35.7488	0.00984143	0.00255114
solcap_snp_sl_13584	2	36.8817	2	35.7488	0.0101308	0.00340599
solcap_snp_sl_13586	2	36.901	2	35.7488	0.0103987	0.00224974
S_744	2	36.9152	2	35.7488	-9.64e-05	-2.25e-05
S_427	2	36.9155	2	35.7488	0.0105217	0.00309843
solcap_snp_sl_4573	2	36.9321	2	35.7488	-0.00285346	0.0272583
solcap_snp_sl_13590	2	36.9326	2	35.7488	0.0104518	0.00315647
CL009035-0516	2	36.9598	2	35.7488	0.0104811	0.00418046
solcap_snp_sl_13595	2	36.9624	2	35.7488	0.0106325	0.0038438
solcap_snp_sl_13596	2	36.9626	2	35.7488	0.0106036	0.00262169
solcap_snp_sl_13597	2	36.9626	2	35.7488	0.0105105	0.00336507
solcap_snp_sl_13599	2	36.9636	2	35.7488	0.0104783	0.00409559
solcap_snp_sl_13600	2	36.9637	2	35.7488	0.010319	0.00331451
solcap_snp_sl_13603	2	36.9723	2	35.7488	0.0105517	0.00382723
solcap_snp_sl_13605	2	36.9764	2	35.7488	0.0110699	0.00370872
solcap_snp_sl_29541	2	36.9878	2	35.7488	0.0104006	0.00416314
solcap_snp_sl_49322	2	37.01	2	35.7488	0.010798	0.00365449
solcap_snp_sl_23863	2	37.0105	2	35.7488	0.0109134	0.00367472
solcap_snp_sl_29543	2	37.0114	2	35.7488	0.0104312	0.00389593
solcap_snp_sl_29545	2	37.0134	2	35.7488	0.0106218	0.00348953
solcap_snp_sl_29546	2	37.0135	2	35.7488	0.0104928	0.00349916
solcap_snp_sl_13611	2	37.0431	2	36.0201	-0.00288008	0.0182278
solcap_snp_sl_13612	2	37.0433	2	36.0201	-0.0029765	0.0182052
solcap_snp_sl_13616	2	37.0436	2	36.0201	-0.00281482	0.0173992
solcap_snp_sl_13617	2	37.0438	2	36.0201	-0.00297577	0.0182058
solcap_snp_sl_13618	2	37.0438	2	36.0201	-0.0029765	0.0182052
solcap_snp_sl_13619	2	37.0439	2	36.0201	-0.00288008	0.0182278
solcap_snp_sl_29547	2	37.0445	2	36.0201	-0.0029152	0.0179674
solcap_snp_sl_13621	2	37.0565	2	36.0201	-0.0029765	0.0182052
solcap_snp_sl_13622	2	37.0566	2	36.0201	-0.0029765	0.0182052
solcap_snp_sl_13623	2	37.0568	2	36.0201	-0.00295626	0.0181696
solcap_snp_sl_13625	2	37.0702	2	36.0201	-0.00300009	0.0207969
solcap_snp_sl_13627	2	37.0716	2	36.0201	-0.00303859	0.0211429
solcap_snp_sl_29548	2	37.0723	2	36.0201	-0.00300131	0.0207958
solcap_snp_sl_13631	2	37.082	2	36.0201	-0.00309756	0.0207718
solcap_snp_sl_29549	2	37.1157	2	36.0201	-0.00292789	0.0212345
solcap_snp_sl_13632	2	37.116	2	36.0201	-0.00295063	0.0215553
solcap_snp_sl_13633	2	37.1161	2	36.0201	-0.00291274	0.0212004
solcap_snp_sl_13634	2	37.1162	2	36.0201	-0.00288982	0.02088
solcap_snp_sl_13636	2	37.1452	2	36.0201	-0.00292789	0.0212345
solcap_snp_sl_49326	2	37.1635	2	36.0201	-0.00279357	0.020904
solcap_snp_sl_49327	2	37.172	2	36.2913	-0.00100901	0.00449006
solcap_snp_sl_29565	2	37.2472	2	36.2913	-0.00100901	0.00449006
solcap_snp_sl_29567	2	37.2722	2	36.2913	-0.00111269	0.00456096
241_2R_407	2	37.3748	2	36.2913	-0.0190924	-0.0253976
241_2F_264_241_2b_60_b	2	37.3767	2	36.2913	-0.0191213	-0.0252344
solcap_snp_sl_29602	2	37.4609	2	36.5625	-0.0010233	0.00448147
SGN-U575873_snp121	2	37.5085	2	37.1138	-0.000898786	0.00432785
SGN-U313785_cLEF-41-C3_snp208	2	37.5092	2	37.1138	-0.000737253	0.00378577
solcap_snp_sl_29627	2	37.5548	2	37.385	-0.000737253	0.00378577
CL009189-0414	2	37.7523	2	37.6562	-0.000926929	0.00407001
CL016172-0398_solcap_snp_sl_29710	2	37.8306	2	37.9275	9.85e-05	0.00129047
solcap_snp_sl_29720	2	37.8588	2	38.1987	-0.000297454	0.00179795
solcap_snp_sl_29749	2	38.0124	2	38.4699	0.000204413	0.00106573
solcap_snp_sl_29766	2	38.0926	2	38.7411	-1.29e-05	0.00128311
solcap_snp_sl_29779	2	38.1289	2	39.5641	2.05e-06	0.00126794
CL016725-0417	2	38.137	2	39.5641	0.000397241	0.0011108
solcap_snp_sl_29785	2	38.168	2	39.5641	0.000204413	0.00106573
solcap_snp_sl_29789	2	38.2313	2	39.8353	0.000300827	0.00108826
SGN-U581277_snp815	2	38.264	2	40.1096	0.000510914	0.000770134
solcap_snp_sl_29814	2	38.4204	2	40.9416	0.00447747	0.00406405
solcap_snp_sl_29826	2	38.5341	2	41.2129	0.00447747	0.00406405
solcap_snp_sl_29840	2	38.6334	2	41.4841	0.00494282	0.00369951
solcap_snp_sl_18401	2	38.8572	2	42.0354	-0.019847	-0.00456686
CL017742-0462	2	38.8915	2	42.0354	-0.00113516	0.000191115
CL015542-0573	2	38.898	2	42.0354	-0.000149931	0.000881256
solcap_snp_sl_49458	2	39.1449	2	43.4114	-0.000149931	0.000881256
solcap_snp_sl_49480	2	39.278	2	43.6826	4.21e-07	0.000445822
solcap_snp_sl_49490	2	39.3096	2	43.9539	-0.000157617	0.000877177
SGN-U313245_T0562_snp547	2	39.3261	2	44.5053	-5.35e-05	0.000903791
solcap_snp_sl_49497	2	39.3371	2	44.5053	-5.35e-05	0.000903791
solcap_snp_sl_49500	2	39.3391	2	44.5053	-5.35e-05	0.000903791
solcap_snp_sl_49505	2	39.3506	2	44.5053	-5.35e-05	0.000903791
SGN-U574334_snp341_solcap_snp_sl_49507	2	39.3699	2	44.5053	-5.35e-05	0.000903791
solcap_snp_sl_49535	2	39.6498	2	45.3331	-0.000157617	0.000877177
SGN-U315352_snp103	2	39.8089	2	45.6058	-0.000149931	0.000881256
solcap_snp_sl_49579	2	39.9168	2	45.8771	-0.00029178	0.00187805
SGN-U575324_snp56571	2	40.0167	2	45.8771	-3.45e-05	0.00166484
SGN-U575324_snp57048	2	40.0172	2	45.8771	-0.000267781	0.00152856
CL009173-0541	2	40.0963	2	46.1483	6.34e-05	0.001691
DOT_468	2	40.1207	2	46.1483	9.68e-05	0.000468357
solcap_snp_sl_49613	2	40.1246	2	46.1483	-5.35e-05	0.000903791
solcap_snp_sl_49645	2	40.2708	2	46.4256	-0.000226719	0.00187269
CL016050-0434	2	40.2925	2	46.4256	-0.00047492	0.00172823
SGN-U586140_snp1218_solcap_snp_sl_49661	2	40.3311	2	46.4256	-5.35e-05	0.000903791
solcap_snp_sl_49664	2	40.3324	2	46.4256	-0.000352289	0.00108347
solcap_snp_sl_49669	2	40.381	2	46.977	-0.000255875	0.001106
solcap_snp_sl_49679	2	40.4224	2	47.5284	-0.000352289	0.00108347
solcap_snp_sl_49726	2	40.5708	2	47.5284	-0.000603041	0.000937655
CL015741-0547	2	40.6164	2	47.5284	-0.000170906	0.00112587
CL015119-0265_solcap_snp_sl_49752	2	40.7551	2	48.3516	0.00154884	0.000352887
solcap_snp_sl_49767	2	40.815	2	48.903	0.00225657	0.00028023
SGN-U584914_snp1830	2	41.0223	2	50.2792	0.00178105	-0.000500581
solcap_snp_sl_49803	2	41.0568	2	50.2792	0.00166494	-0.000286036
CL017414-0128	2	41.2157	2	50.5505	0.00261139	-0.000586657
solcap_snp_sl_29891	2	41.3418	2	51.1019	-0.000813045	-0.00251269
SGN-U576591_snp67938	2	41.361	2	51.1019	0.00234432	-0.000511638
SGN-U576591_snp65026	2	41.3639	2	51.1019	0.00281681	-0.00100004
SGN-U586520_snp61163	2	41.3678	2	51.1019	0.00204284	-0.000225034
SGN-U586520_snp60358	2	41.3686	2	51.1019	0.00224564	-0.000430348
solcap_snp_sl_4829	2	41.726	2	53.5955	-0.032829	0.0286322
solcap_snp_sl_18519	2	41.7824	2	53.8667	-0.00764001	-0.000988572
solcap_snp_sl_4831	2	41.7962	2	53.8667	-0.0331749	0.0266215
solcap_snp_sl_17161	2	42.1907	2	54.69	-0.00687603	-0.00178491
SGN-U316347_T1535_snp219_solcap_snp_sl_42471	2	43.23	2	57.1832	-0.000322011	0.000663855
solcap_snp_sl_42411	2	43.7044	2	58.8372	-0.000908226	0.000260288
solcap_snp_sl_42383	2	43.8355	2	59.6605	-0.000287885	0.000545016
solcap_snp_sl_42346	2	43.9781	2	60.4838	-0.00103088	0.000527694
SGN-U579280_snp65613	2	44.0632	2	61.0353	-0.000119231	0.000907465
SGN-U579280_snp65625	2	44.0632	2	61.0353	-0.000119231	0.000907465
SGN-U590370_snp65805	2	44.0634	2	61.0353	-0.000423706	0.00109228
SGN-U590370_snp65811	2	44.0634	2	61.0353	-0.000215645	0.000884931
SGN-U590370_snp65846	2	44.0634	2	61.0353	-0.000470247	0.00113371
SGN-U590370_snp65887	2	44.0634	2	61.0353	-0.000470247	0.00113371
SGN-U579752_snp292_solcap_snp_sl_42324	2	44.0694	2	61.0353	-0.00105775	0.00051073
CL015021-0454	2	44.0729	2	61.0353	-0.000549408	0.000790025
solcap_snp_sl_42301	2	44.2213	2	62.4116	-0.000583451	0.000323982
solcap_snp_sl_50166	2	44.3026	2	62.4116	-0.00045067	0.000813827
CL015559-0344	2	44.3521	2	62.6829	-0.000934468	0.000550229
solcap_snp_sl_29920	2	44.4333	2	62.9541	-0.00144111	0.000434149
solcap_snp_sl_50126	2	44.5246	2	63.5056	-0.000222145	0.000541355
CL015139-0364	2	44.6094	2	63.5056	-0.000161669	-0.000280578
SGN-U572314_snp1007_solcap_snp_sl_29914	2	44.6544	2	63.5056	-0.00157809	-0.000127991
solcap_snp_sl_50060	2	44.8099	2	63.7768	-0.00048549	0.000361312
solcap_snp_sl_50058	2	44.8137	2	63.7768	-0.000965725	0.000100569
solcap_snp_sl_50055	2	44.8383	2	63.7768	-0.000221473	0.00011181
solcap_snp_sl_67090	2	46.6428	2	69.4271	3.7e-05	0.000924944
CL017715-0287_solcap_snp_sl_67052	2	46.8555	2	71.3601	-9.6e-05	0.000423287
solcap_snp_sl_36232	2	46.8566	2	71.3601	-0.0005566	0.000166145
ABA1_2029_solcap_snp_sl_67036	2	46.9479	2	71.9117	-9.6e-05	0.000423287
ABA1_Promoter_SNP2_solcap_snp_sl_67034	2	46.9525	2	71.9117	-0.000102249	0.000419627
solcap_snp_sl_67032	2	46.9531	2	71.9117	-9.6e-05	0.000423287
ABA1_Promoter_SNP1	2	46.9532	2	71.9117	-0.000606307	9.41e-05
CL017806-0320_solcap_snp_sl_67017	2	47.0268	2	72.4695	-9.6e-05	0.000423287
solcap_snp_sl_67010	2	47.0958	2	72.7407	-9.6e-05	0.000423287
solcap_snp_sl_36221	2	47.1969	2	73.5642	-0.00135375	-0.000564486
solcap_snp_sl_66965	2	47.3446	2	73.8354	-9.64e-05	-2.25e-05
solcap_snp_sl_66955	2	47.3617	2	73.8354	0	0
solcap_snp_sl_66953	2	47.3648	2	73.8354	-9.64e-05	-2.25e-05
solcap_snp_sl_66951	2	47.3661	2	73.8354	0	0
solcap_snp_sl_36202	2	47.6514	2	74.659	-0.00199301	-0.00124008
solcap_snp_sl_66904	2	47.6832	2	74.9302	0	0
solcap_snp_sl_66878	2	47.7869	2	75.2015	-0.000387784	-0.000176832
solcap_snp_sl_21867	2	47.9489	2	75.4852	-0.011687	0.0123375
solcap_snp_sl_21866	2	47.9501	2	75.4852	-0.00966532	0.0140487
solcap_snp_sl_36193	2	47.9719	2	75.4852	-0.00684393	0.00434644
solcap_snp_sl_21862	2	47.9815	2	75.4852	-0.0107626	0.0136952
solcap_snp_sl_36189	2	47.9964	2	75.4852	-0.00147494	-0.000927571
solcap_snp_sl_36188	2	48.0287	2	75.4852	-0.00243718	-0.00158124
solcap_snp_sl_67551	2	48.3952	2	76.3087	-6.73e-05	0.00074415
solcap_snp_sl_58490	2	48.444	2	76.3087	-6.73e-05	0.00074415
solcap_snp_sl_20063	2	48.4551	2	76.3087	-0.004851	-0.00293538
solcap_snp_sl_58462	2	48.5474	2	77.1321	-9.62e-05	-1.72e-05
solcap_snp_sl_58447	2	48.6022	2	77.9556	-0.00349016	-0.00611136
solcap_snp_sl_20052	2	48.685	2	77.9556	-0.010121	0.0202136
solcap_snp_sl_20049	2	48.6972	2	78.2268	0.0140852	-0.0177478
solcap_snp_sl_58414	2	48.7283	2	78.2268	-0.000313854	0.000600071
solcap_snp_sl_20044	2	48.8789	2	78.2268	-0.0134003	0.018353
solcap_snp_sl_32389	2	48.9434	2	78.2268	-0.00297087	-0.00117796
CL016196-0121	2	49.0019	2	78.7784	-6.73e-05	0.00074415
SGN-U313919_snp500	2	49.0156	2	78.7784	-6.73e-05	0.00074415
solcap_snp_sl_48037	2	49.047	2	80.1528	-6.73e-05	0.00074415
solcap_snp_sl_48033	2	49.0924	2	80.1528	-6.73e-05	0.00074415
solcap_snp_sl_29351	2	49.2413	2	80.1528	-0.00644017	-0.00290487
solcap_snp_sl_47977	2	49.336	2	79.0496	-7.02e-05	0.000742307
solcap_snp_sl_47942	2	49.4524	2	79.6012	-6.73e-05	0.00074415
CL017391-0390	2	49.5633	2	79.6012	-6.73e-05	0.00074415
solcap_snp_sl_47897	2	49.6113	2	79.6012	-6.73e-05	0.00074415
solcap_snp_sl_47885	2	49.755	2	79.6012	-9.62e-05	-1.72e-05
solcap_snp_sl_47880	2	49.8162	2	79.6012	-6.73e-05	0.00074415
solcap_snp_sl_63048	3	0.071076	3	0	0.00275777	0.00179412
CL016802-0675	3	0.119273	3	0	0.00343664	0.000848927
CL017202-0450_solcap_snp_sl_63109	3	0.304215	3	0.2712	0.00308362	0.000881189
CL017080-0223	3	0.305505	3	0.5425	0.00300468	0.000917599
solcap_snp_sl_63114	3	0.334009	3	0.5425	0.00207439	0.00188606
CL016925-0828	3	0.346009	3	0.8137	0.00308362	0.000881189
solcap_snp_sl_63167	3	0.631452	3	1.9129	0.00251513	0.00088432
solcap_snp_sl_63184	3	0.748576	3	2.4644	-0.000256356	0.000954274
solcap_snp_sl_9663	3	0.828684	3	3.016	0.00513407	-0.0154657
solcap_snp_sl_21215	3	1.03447	3	3.8394	-0.00853407	-0.00350026
solcap_snp_sl_9666	3	1.04569	3	3.8394	-0.00718038	-0.0021609
solcap_snp_sl_9667	3	1.0459	3	3.8394	-0.00749411	-0.00235368
solcap_snp_sl_21216	3	1.05689	3	3.8394	-0.00718272	-0.00217938
solcap_snp_sl_63240	3	1.14434	3	4.1106	-0.000727341	0.000700133
solcap_snp_sl_9681	3	1.25756	3	6.3242	-0.00788844	0.00225892
solcap_snp_sl_63273	3	1.32308	3	6.8758	-6.57e-05	3.67e-06
CL016787-0272_solcap_snp_sl_63305	3	1.55432	3	9.0896	-0.000872451	-0.000108435
solcap_snp_sl_63307	3	1.63195	3	9.6412	0	0
SGN-U569291_snp1086	3	1.70429	3	9.9125	-0.000843295	0.000658249
solcap_snp_sl_63356	3	1.87703	3	14.6942	-0.000640937	0.000456038
CL017347-0326_solcap_snp_sl_63360	3	1.89129	3	14.6942	-9.64e-05	-2.25e-05
solcap_snp_sl_9689	3	2.05301	3	16.639	-0.011527	-0.0125167
SL10790_382	3	2.05349	3	16.639	-0.0105758	-0.01635
solcap_snp_sl_15320	3	2.07258	3	16.639	-0.0103536	-0.0162042
solcap_snp_sl_63391	3	2.0737	3	16.639	-0.00603032	-0.0136447
solcap_snp_sl_63402	3	2.11183	3	16.639	-0.000796693	0.000440172
CL017009-0461	3	2.14754	3	16.639	-0.000767537	0.00120686
solcap_snp_sl_9703	3	2.37214	3	22.3004	-0.00762959	-0.0144167
solcap_snp_sl_28569	3	2.50006	3	45.9712	0.00023126	0.00161042
solcap_snp_sl_28572	3	3.32718	3	45.9712	0.000370127	0.000975055
solcap_snp_sl_28574	3	3.97129	3	45.9712	0.00023126	0.00161042
solcap_snp_sl_28577	3	4.06934	3	45.9712	0.000258729	0.000182361
solcap_snp_sl_28580	3	5.67111	3	45.9712	0.000349228	0.00018328
solcap_snp_sl_19643	3	6.61272	3	64.6531	-0.00652874	0.0182256
solcap_snp_sl_55754	3	6.65935	3	64.3818	-0.000211199	0.0014035
solcap_snp_sl_19654	3	6.76265	3	64.1106	0.00263884	-0.00845077
solcap_snp_sl_19657	3	6.8067	3	63.8394	0.00405258	-0.00719838
solcap_snp_sl_55790	3	6.80844	3	63.8394	-0.000109968	0.001429
solcap_snp_sl_55812	3	6.88758	3	63.2879	-9.64e-05	-2.25e-05
solcap_snp_sl_55125	3	6.97949	3	22.5716	0	0
solcap_snp_sl_14355	3	7.08513	3	24.7852	-0.00330637	0.0155897
solcap_snp_sl_14354	3	7.09557	3	25.0564	-0.00218755	0.0146028
solcap_snp_sl_14353	3	7.09586	3	25.0564	-0.00240652	0.0144871
solcap_snp_sl_55107	3	7.11524	3	25.0564	-0.00105489	0.000985365
solcap_snp_sl_55088	3	7.19616	3	25.8798	-9.49e-05	0.00143689
solcap_snp_sl_55055	3	7.29371	3	26.4314	-9.74e-05	0.0015175
solcap_snp_sl_55037	3	7.34138	3	26.4314	-0.00242423	0.0042086
solcap_snp_sl_55026	3	7.41582	3	26.4314	-9.49e-05	0.00143689
SGN-U564013_snp1820_solcap_snp_sl_55020	3	7.51844	3	28.0867	-0.00162451	0.005377
solcap_snp_sl_55002	3	7.60432	3	29.4641	-0.000920532	0.00300676
SGN-U567178_snp438_solcap_snp_sl_31828	3	7.71479	3	30.5642	0.000526793	0.00128953
solcap_snp_sl_31826	3	7.71739	3	30.5642	0.000526793	0.00128953
solcap_snp_sl_54950	3	7.89031	3	32.2299	2.92e-05	0.000766685
solcap_snp_sl_31817	3	7.92846	3	32.2299	-0.0118509	-0.00229345
solcap_snp_sl_19509	3	7.92881	3	32.2299	-0.0115688	-0.00318504
solcap_snp_sl_19508	3	7.98807	3	32.2299	-0.0105096	0.00117843
CL016675-0242	3	8.26647	3	33.3303	2.92e-05	0.000766685
solcap_snp_sl_1599	3	8.30833	3	33.3303	0.00167943	0.0146847
solcap_snp_sl_41353	3	8.42522	3	34.4306	-0.000683537	0.00238041
SGN-U585791_snp124_solcap_snp_sl_41379	3	8.55788	3	34.7019	-0.000212122	0.000625562
PSY1_Promoter_SNP1	3	8.60383	3	34.9731	0	0
solcap_snp_sl_41389	3	8.61029	3	34.9731	-0.000497775	-0.000322597
solcap_snp_sl_23193	3	8.70814	3	36.0732	0.00785966	0.0160728
solcap_snp_sl_27108	3	8.74544	2	0	-0.000112183	0.00046534	x
solcap_snp_sl_27113	3	8.78146	3	36.625	0.000384168	0.00095157
solcap_snp_sl_23196	3	8.90422	3	37.1768	-0.0129468	0.0214868
solcap_snp_sl_27130	3	8.92705	3	37.1768	0.000383499	0.000951157
Le004314_168_solcap_snp_sl_27137	3	8.94172	3	37.1768	0.000354343	0.000184472
solcap_snp_sl_27151	3	9.04666	3	37.7286	0.000284458	0.000926924
solcap_snp_sl_26280	3	9.16473	3	38.8286	0.00025793	0.000161937
solcap_snp_sl_26291	3	9.23235	3	39.3804	0.000349228	0.00018328
solcap_snp_sl_16433	3	9.26172	3	39.9322	0.00244688	-0.0129237
Le000209_237_solcap_snp_sl_26315	3	9.41686	3	41.3093	0.000383499	0.000951157
SL10506_244	3	9.51934	3	42.4093	0.000129353	6.51e-05
solcap_snp_sl_26323	3	9.56063	3	42.6806	0.000158509	0.000831794
SGN-U573440_snp365	3	9.69559	3	43.5043	-0.000110625	-0.000100557
solcap_snp_sl_26327	3	9.71175	3	43.5043	0.000383499	0.000951157
solcap_snp_sl_26366	3	10.1588	3	44.8817	-0.00100068	5.06e-05
solcap_snp_sl_26385	3	10.4746	3	45.153	0.000354343	0.000184472
solcap_snp_sl_26387	3	10.521	3	45.153	0.000383499	0.000951157
Le004122_27_solcap_snp_sl_26398	3	10.6711	3	45.153	-0.000324057	0.000488238
solcap_snp_sl_26399	3	10.6766	3	45.153	0.000383499	0.000951157
solcap_snp_sl_30106	3	11.0663	3	45.153	0.000383538	0.000951173
solcap_snp_sl_30084	3	11.3028	3	45.4288	0.000383499	0.000951157
solcap_snp_sl_50341	3	11.5014	3	45.4288	0.000354343	0.000184472
solcap_snp_sl_30074	3	11.7259	3	45.7	0.000383499	0.000951157
solcap_snp_sl_30067	3	12.0064	3	45.7	0.000354343	0.000184472
solcap_snp_sl_18590	3	12.1613	3	45.7	-0.00745432	-0.003989
solcap_snp_sl_18588	3	12.1719	3	45.7	-0.00709786	-0.00381389
solcap_snp_sl_30057	3	12.1723	3	45.7	0.000354343	0.000184472
solcap_snp_sl_18585	3	12.1906	3	45.7	-0.00785969	-0.00435143
solcap_snp_sl_18583	3	12.1908	3	45.7	-0.00747032	-0.00485084
solcap_snp_sl_18582	3	12.1912	3	45.7	-0.00744169	-0.00408342
solcap_snp_sl_18581	3	12.1922	3	45.7	-0.00702238	-0.00379102
solcap_snp_sl_50331	3	12.2489	3	45.7	0.000383493	0.000951155
solcap_snp_sl_30046	3	12.4571	3	45.9712	0.000282226	0.000925924
solcap_snp_sl_30038	3	12.7426	3	45.9712	0.000383499	0.000951157
solcap_snp_sl_4937	3	12.8669	3	45.9712	-0.0148659	0.0282079
solcap_snp_sl_30035	3	13.1928	3	45.9712	0.000375517	0.000949247
solcap_snp_sl_30033	3	13.3083	3	45.9712	0.000383499	0.000951157
solcap_snp_sl_30031	3	14.1769	3	45.9712	0.000383499	0.000951157
solcap_snp_sl_30024	3	14.3675	3	45.9712	0.000280723	0.000925065
solcap_snp_sl_50318	3	14.7438	3	45.9712	0.000383499	0.000951157
solcap_snp_sl_30015	3	14.8764	3	45.9712	0.000137365	0.0015847
solcap_snp_sl_30006	3	15.4751	3	45.9712	0.000147962	0.00159094
solcap_snp_sl_31646	3	16.3833	3	45.9712	0.000244376	0.00161347
solcap_snp_sl_31648	3	16.7788	3	45.9712	0.000383499	0.000951157
solcap_snp_sl_31653	3	16.877	3	45.9712	0.00023126	0.00161042
solcap_snp_sl_31655	3	17.1533	3	45.9712	0.000244376	0.00161347
solcap_snp_sl_28586	3	19.4294	3	45.9712	0.00023126	0.00161042
solcap_snp_sl_36888	3	20.2289	3	45.9712	0.000244376	0.00161347
SGN-U576317_snp104_solcap_snp_sl_32529	3	20.5046	3	45.9712	0.000147962	0.00159094
solcap_snp_sl_32530	3	20.5183	3	45.9712	0.000137365	0.0015847
SGN-U604433_snp183_solcap_snp_sl_29934	3	21.3301	3	45.9712	0.00023126	0.00161042
SGN-U564058_snp1352_solcap_snp_sl_29940	3	21.8563	3	45.9712	0.000370127	0.000975055
solcap_snp_sl_29946	3	22.0913	3	45.9712	0.000354343	0.000184472
solcap_snp_sl_50297	3	24.2308	3	45.9712	0.000352361	0.000212231
solcap_snp_sl_50305	3	24.949	3	45.9712	0.000244376	0.00161347
solcap_snp_sl_50307	3	25.2388	3	45.9712	0.00023126	0.00161042
solcap_snp_sl_29975	3	25.557	3	45.9712	0.000147962	0.00159094
solcap_snp_sl_51994	3	27.847	3	45.9712	0.00025793	0.000161937
solcap_snp_sl_30528	3	29.0179	3	45.9712	0.000120188	0.000859559
solcap_snp_sl_30532	3	29.1513	3	45.9712	0.000147962	0.00159094
solcap_snp_sl_52143	3	29.4367	3	45.9712	0.000240358	0.00174215
solcap_snp_sl_30540	3	29.7005	3	45.9712	0.000349228	0.00018328
Le004377_94	3	29.8966	3	45.9712	0.00023126	0.00161042
solcap_snp_sl_30543	3	29.8976	3	45.9712	0.000354936	0.000199604
solcap_snp_sl_30552	3	30.6155	3	45.9712	0.000147962	0.00159094
solcap_snp_sl_30553	3	30.7579	3	45.9712	0.000147962	0.00159094
solcap_snp_sl_30556	3	30.8921	3	45.9712	0.00023126	0.00161042
solcap_snp_sl_30559	3	31.039	3	45.9712	0.00023126	0.00161042
solcap_snp_sl_30586	3	32.617	3	45.9712	0.000349228	0.00018328
solcap_snp_sl_30587	3	32.6776	3	45.9712	0.00023126	0.00161042
solcap_snp_sl_30589	3	33.1121	3	45.9712	0.000147962	0.00159094
solcap_snp_sl_30590	3	33.3417	3	45.9712	0.000354343	0.000184472
solcap_snp_sl_30593	3	34.0107	3	45.9712	0.00023126	0.00161042
solcap_snp_sl_36304	3	38.3883	3	45.9712	0.000349228	0.00018328
solcap_snp_sl_36307	3	38.8009	3	45.9712	0.00023126	0.00161042
solcap_snp_sl_36308	3	38.8016	3	45.9712	0.00023126	0.00161042
solcap_snp_sl_36309	3	38.8021	3	45.9712	0.000147962	0.00159094
solcap_snp_sl_30354	3	41.1597	3	45.9712	0.00023126	0.00161042
solcap_snp_sl_51487	3	41.5486	3	45.9712	0.000354343	0.000184472
solcap_snp_sl_27253	3	42.0745	3	45.9712	0.0002048	0.000844359
solcap_snp_sl_27248	3	42.3902	3	45.9712	0.000354343	0.000184472
solcap_snp_sl_27246	3	43.4012	3	45.9712	0.000368662	0.000987525
solcap_snp_sl_27243	3	43.5952	3	45.9712	0.000147962	0.00159094
solcap_snp_sl_27238	3	43.6408	3	45.9712	0.000147962	0.00159094
solcap_snp_sl_27230	3	43.8891	3	45.9712	0.000354343	0.000184472
solcap_snp_sl_42166	3	43.8895	3	45.9712	0.000147962	0.00159094
solcap_snp_sl_27228	3	44.2265	3	45.9712	0.00025793	0.000161937
solcap_snp_sl_1772	3	44.268	3	45.9712	-0.0143835	0.028063
solcap_snp_sl_42160	3	44.7801	3	46.2424	0.000147962	0.00159094
solcap_snp_sl_30945	3	45.4434	3	46.2424	0.00023126	0.00161042
solcap_snp_sl_5764	3	45.5933	3	46.5137	-0.0122449	0.0254041
solcap_snp_sl_5769	3	45.5979	3	46.5137	-0.010451	0.0261474
solcap_snp_sl_5771	3	45.6137	3	46.5137	-0.0114764	0.0253599
solcap_snp_sl_14002	3	45.6256	3	46.5137	0.00534285	-0.0124326
solcap_snp_sl_5773	3	45.6301	3	46.5137	-0.00998242	0.0245709
solcap_snp_sl_5774	3	45.6301	3	46.5137	-0.0100864	0.0263117
solcap_snp_sl_30631	3	45.9551	3	47.3373	0.000348564	0.000182873
solcap_snp_sl_30657	3	46.0832	3	47.889	-0.000101677	0.00141741
solcap_snp_sl_30678	3	46.1754	3	47.889	0.000244376	0.00161347
solcap_snp_sl_30704	3	46.3794	3	49.2661	0.000354343	0.000184472
solcap_snp_sl_18943	3	46.6108	3	49.5374	-0.00323947	-0.000640798
CL016221-0325	3	46.6515	3	49.8086	-0.00127384	0.000665248
solcap_snp_sl_30763	3	46.707	3	49.8086	1.7e-05	0.0014539
solcap_snp_sl_30774	3	46.734	3	50.0798	0.000383499	0.000951157
solcap_snp_sl_30776	3	46.7358	3	50.0798	0.000244376	0.00161347
solcap_snp_sl_18949	3	46.7881	3	50.0798	-0.00286213	0.00261738
solcap_snp_sl_18952	3	46.8429	3	50.0798	-0.00356586	0.00110428
SL10910_315	3	46.849	3	50.0798	0.00119753	0.00124778
solcap_snp_sl_18959	3	46.8893	3	50.351	-0.00370054	0.00120868
solcap_snp_sl_18967	3	47.2169	3	50.351	0.000140596	-0.015838
solcap_snp_sl_30821	3	47.217	3	50.351	0.000868507	0.00107345
solcap_snp_sl_30825	3	47.3716	3	50.351	0.00110567	0.00122384
solcap_snp_sl_30827	3	47.47	3	50.351	0.00129696	-0.000177993
solcap_snp_sl_30918	3	47.8418	3	50.6223	0.0012043	0.0011933
solcap_snp_sl_52395	3	47.8965	3	50.6223	0.00130071	0.00121583
solcap_snp_sl_30911	3	47.9317	3	50.8935	-0.00300417	-0.00149669
solcap_snp_sl_5722	3	48.1428	3	51.717	0.00232857	-0.0034959
solcap_snp_sl_30862	3	48.3743	3	52.2687	0.0015872	-0.000247984
solcap_snp_sl_30860	3	48.3747	3	52.2687	-0.000757856	-6.51e-05
solcap_snp_sl_30857	3	48.4769	3	52.2687	0.00168642	0.00122896
solcap_snp_sl_30848	3	48.7736	3	52.8266	0.00179638	-0.000200046
solcap_snp_sl_18982	3	48.9325	3	52.8266	-0.0118465	-0.00302671
solcap_snp_sl_18981	3	48.9327	3	52.8266	-0.0121218	-0.00320517
solcap_snp_sl_18978	3	48.9622	3	52.8266	-0.0128047	-0.003528
solcap_snp_sl_30839	3	49.1291	3	52.8266	0.00156944	-0.000181609
solcap_snp_sl_30833	3	49.1492	3	53.0978	0.00159	0.00120642
SL10736_542	3	49.1994	3	53.0978	0.00149231	-0.000186388
solcap_snp_sl_52371	3	49.5092	3	53.0978	0.00168642	0.00122896
solcap_snp_sl_35295	3	49.6786	3	53.0978	0.00179638	-0.000200046
solcap_snp_sl_35299	3	49.7626	3	53.0978	0.00140475	0.00116397
SL20037_731	3	49.9812	3	53.0978	0.00179638	-0.000200046
solcap_snp_sl_35313	3	50.0387	3	53.0978	0.00169249	-0.000129999
solcap_snp_sl_35323	3	50.2395	3	53.0978	0.00179638	-0.000200046
solcap_snp_sl_35331	3	50.3385	3	53.6496	0.00159	0.00120642
solcap_snp_sl_35332	3	50.3393	3	53.6496	0.00140475	0.00116397
solcap_snp_sl_35333	3	50.3393	3	53.6496	0.00132129	-0.000172602
SGN-U582610_snp835_solcap_snp_sl_35344	3	50.4233	3	53.6496	0.00159	0.00120642
solcap_snp_sl_35345	3	50.4233	3	53.6496	0.00168642	0.00122896
solcap_snp_sl_65736	3	50.9861	3	54.2014	0.00159	0.00120642
solcap_snp_sl_35369	3	51.2311	3	54.4726	0.00169997	-0.000222581
solcap_snp_sl_65758	3	51.3813	3	54.4726	0.00140475	0.00116397
solcap_snp_sl_35382	3	51.8747	3	54.4726	-0.000309279	0.000117911
solcap_snp_sl_35394	3	52.1484	3	54.4726	0.00158892	-0.000211098
solcap_snp_sl_35407	3	52.5288	3	55.0243	0.000147962	0.00159094
solcap_snp_sl_35413	3	52.6091	3	55.2955	0.000147962	0.00159094
solcap_snp_sl_35443	3	52.7856	3	55.8474	0.000147962	0.00159094
solcap_snp_sl_35459	3	52.8295	3	55.8474	0.000141626	0.00158694
solcap_snp_sl_35497	3	52.9526	3	55.8474	0.000354343	0.000184472
solcap_snp_sl_10377	3	52.9536	3	55.8474	-0.00430277	0.000565561
solcap_snp_sl_35540	3	53.0861	3	57.2248	-0.00786029	-0.0041586
CL016938-0536	3	53.0987	3	57.2248	0.0199812	-0.0133331
solcap_snp_sl_21682	3	53.1174	3	57.2248	0.0191552	-0.0134847
solcap_snp_sl_21683	3	53.1176	3	57.2248	0.0204087	-0.0138127
solcap_snp_sl_21684	3	53.1281	3	57.2248	0.0199237	-0.0132273
solcap_snp_sl_21685	3	53.1654	3	57.4975	0.0203075	-0.014239
solcap_snp_sl_35601	3	53.4405	3	58.3258	-0.000109968	0.001429
solcap_snp_sl_21694	3	53.5057	3	58.3258	0.00337476	-0.0188407
solcap_snp_sl_35619	3	53.5497	3	58.597	-0.000109968	0.001429
solcap_snp_sl_35638	3	53.7844	3	59.4207	0	0
solcap_snp_sl_35650	3	53.8743	3	59.6919	-0.0146825	0.0323547
solcap_snp_sl_35677	3	54.0225	3	59.6919	-0.000139123	0.000662316
solcap_snp_sl_35697	3	54.1089	3	60.2436	-0.000225646	0.00142207
solcap_snp_sl_25390	3	54.1316	3	60.2436	0.0107609	-0.0119462
solcap_snp_sl_35720	3	54.3526	3	61.6357	0	0
CL015971-0495	3	54.4361	3	62.1933	0.00278269	-0.00891509
solcap_snp_sl_65890	3	54.5161	3	63.0166	-0.000197314	-0.000149349
solcap_snp_sl_31018	3	54.8861	3	45.9712	0.000147962	0.00159094
solcap_snp_sl_58651	3	55.6854	3	64.6531	-0.000206381	0.00140647
solcap_snp_sl_20088	3	55.7154	3	64.6531	-0.00963417	0.0178871
solcap_snp_sl_14714	3	55.8	3	64.9243	0.0222476	-0.0222238
solcap_snp_sl_58630	3	55.8203	3	64.9243	0	0
solcap_snp_sl_58614	3	55.8963	3	65.4758	-0.000139123	0.000662316
solcap_snp_sl_7942	3	55.9821	3	65.4758	0.00615942	0.0128331
solcap_snp_sl_7940	3	55.9867	3	65.4758	0.0038212	-0.015958
solcap_snp_sl_7939	3	56.0051	3	65.4758	0.00488834	-0.0161366
solcap_snp_sl_58584	3	56.0518	3	65.4758	-0.000109968	0.001429
solcap_snp_sl_58550	3	56.3224	3	66.8521	-0.000109968	0.001429
solcap_snp_sl_7919	3	56.4392	3	67.4036	-0.00134589	-0.0198935
solcap_snp_sl_58518	3	56.4815	3	67.6749	0.000728711	0.00303558
solcap_snp_sl_15960	3	56.6283	3	67.9461	0.00474414	-0.00818695
solcap_snp_sl_69353	3	56.6564	3	68.2173	2.92e-05	0.000766685
solcap_snp_sl_11602	3	56.6997	3	68.2173	0.00562014	0.0184548
solcap_snp_sl_62531	3	57.0019	3	70.4309	-0.000192414	-3.45e-05
solcap_snp_sl_9383	3	57.0125	3	70.7021	0.0199059	-0.0201034
solcap_snp_sl_9382	3	57.0304	3	70.7021	0.0200514	-0.0203286
solcap_snp_sl_62520	3	57.0716	3	71.5256	2.65e-05	0.000766056
CL015346-0143_solcap_snp_sl_62495	3	57.2169	3	72.9026	0.0219071	0.00212454
solcap_snp_sl_62473	3	57.358	3	73.4543	0.0210153	0.000693893
SGN-U565563_snp1042_solcap_snp_sl_62467	3	57.3794	3	73.4543	0.0209551	0.00143682
CL016891-0260	3	57.4432	3	73.4543	0.0207097	0.00104114
CL015455-0169	3	57.4996	3	74.0059	0.0207543	0.00158717
CL017416-0406	3	57.6712	3	74.8293	0.0269552	-0.000627388
SL10909_238	3	57.7276	3	75.1005	0.0266822	-0.00917783
solcap_snp_sl_62377	3	57.764	3	75.1005	0.0267483	-0.00929904
CL015860-0475	3	57.7994	3	75.3717	0.0269194	-0.00920537
CL017298-0054_solcap_snp_sl_62362	3	57.8226	3	75.6445	0.0252973	-0.00893791
solcap_snp_sl_62348	3	57.8949	3	76.1991	0.0231792	-0.010357
solcap_snp_sl_62336	3	58.0945	3	77.0224	0.0263536	-0.00966915
SL10450_71	3	58.1996	3	77.574	0.0287053	-0.00959952
solcap_snp_sl_62270	3	58.3591	3	79.2284	0.0288	-0.00948033
solcap_snp_sl_62259	3	58.4013	3	79.4997	0.0270732	-0.00783268
solcap_snp_sl_62245	3	58.4274	3	79.4997	0.0241996	-0.0110373
solcap_snp_sl_62228	3	58.5384	3	80.0512	0.0279166	-0.00910975
solcap_snp_sl_9298	3	58.566	3	80.0512	-0.011302	0.0323105
solcap_snp_sl_62209	3	58.6397	3	80.3269	0.0280722	-0.00829809
solcap_snp_sl_9292	3	58.6419	3	80.3269	-0.0157162	0.0289682
solcap_snp_sl_62180	3	58.7428	3	81.1502	0.0299006	-0.0100822
CL015369-0414	3	58.8765	3	81.9734	-0.000246766	0.000412899
solcap_snp_sl_62133	3	58.9508	3	82.525	-0.000246766	0.000412899
CL017463-0220_solcap_snp_sl_62120	3	58.9869	3	82.525	-0.000246766	0.000412899
solcap_snp_sl_9260	3	59.0572	3	82.7962	0.00653735	-0.0184996
solcap_snp_sl_9252	3	59.1018	3	82.7962	0.0054172	-0.0191454
solcap_snp_sl_34196	3	59.1022	3	82.7962	-0.00385973	-0.00244812
solcap_snp_sl_61886	3	60.1531	3	86.997	-0.00301575	-0.000550239
CL015521-0417	3	60.3935	3	88.0962	-0.00222139	-0.00138477
solcap_snp_sl_61820	3	60.6986	3	88.6476	0.00139516	0.00205014
solcap_snp_sl_9127	3	60.7959	3	88.9189	-0.00831472	0.0276638
solcap_snp_sl_61800	3	60.8172	3	88.9189	-0.00929175	0.0277059
solcap_snp_sl_9116	3	60.8179	3	88.9189	-0.00997333	0.0266847
solcap_snp_sl_20802	3	60.8601	3	89.4704	0.00925039	-0.0280516
solcap_snp_sl_20801	3	60.8624	3	89.4704	-0.00901522	0.0272805
solcap_snp_sl_20765	3	60.983	3	90.2937	-0.0110825	0.0252965
solcap_snp_sl_20762	3	60.987	3	90.2937	0.00959272	-0.0272035
solcap_snp_sl_20760	3	61.0051	3	90.5649	0.0095407	-0.0269381
solcap_snp_sl_20751	3	61.0489	3	90.5649	-0.0097009	0.0272491
solcap_snp_sl_34115	3	61.1013	3	90.5649	-0.00962177	0.0274846
solcap_snp_sl_20724	3	61.1334	3	91.1164	0.00991105	-0.0282485
solcap_snp_sl_20723	3	61.135	3	91.1164	-0.0103086	0.0283015
solcap_snp_sl_20721	3	61.157	3	91.3876	-0.00937811	-0.0176419
solcap_snp_sl_20714	3	61.1807	3	91.3876	-0.00930797	-0.0154267
solcap_snp_sl_20690	3	61.3092	3	93.6	-0.00613273	-0.00268616
solcap_snp_sl_34105	3	61.3529	3	93.6	-0.00357873	-0.000787275
solcap_snp_sl_61670	3	61.566	3	94.6992	0	0
solcap_snp_sl_61634	3	61.6741	3	95.2506	-0.000658799	0.000867804
SGN-U577717_snp348_solcap_snp_sl_61632	3	61.6804	3	95.2506	-0.000656272	0.000866634
SL10678_608	3	61.9195	3	96.35	0.00227656	-0.000654549
solcap_snp_sl_34088	3	62.0593	3	96.9014	0	0
solcap_snp_sl_34050	3	62.253	3	98.567	0	0
solcap_snp_sl_34048	3	62.2584	3	98.567	-9.64e-05	-2.25e-05
solcap_snp_sl_34013	3	62.4664	3	98.567	-0.000192828	-4.51e-05
solcap_snp_sl_33975	3	62.682	3	99.3903	-0.000204333	-5.23e-05
solcap_snp_sl_33968	3	62.7647	3	99.3903	-0.000192828	-4.51e-05
solcap_snp_sl_33958	3	62.7919	3	99.6615	0	0
solcap_snp_sl_33949	3	62.8177	3	99.9327	0	0
solcap_snp_sl_33948	3	62.8182	3	99.9327	0	0
SL20050_135	3	62.8771	3	100.484	0	0
CL017699-0108_solcap_snp_sl_61460	3	63.0624	3	101.584	0	0
solcap_snp_sl_61437	3	63.1639	3	101.855	-0.000192828	-4.51e-05
solcap_snp_sl_33905	3	63.2964	3	102.678	-0.000940193	-0.000517294
solcap_snp_sl_61411	3	63.3356	3	102.678	-0.000462835	-0.000215521
Le007369_198	3	63.3523	3	102.678	-0.00069057	-0.000366916
solcap_snp_sl_33882	3	63.3537	3	102.678	0	0
solcap_snp_sl_33877	3	63.4032	3	102.678	-0.000259108	-0.00016347
solcap_snp_sl_33855	3	63.5242	3	103.23	-0.000198675	-4.89e-05
solcap_snp_sl_33838	3	63.6083	3	103.781	0	0
solcap_snp_sl_33829	3	63.8136	3	104.881	-0.00180994	2.7e-05
solcap_snp_sl_33819	3	63.9661	3	105.709	0.00683823	-0.0201596
solcap_snp_sl_33815	3	64.1356	3	107.092	0.0129939	-0.0130668
solcap_snp_sl_61238	3	64.2811	3	107.092	-0.000192828	-4.51e-05
solcap_snp_sl_22017	3	64.3971	3	108.192	-0.0183477	0.0332221
solcap_snp_sl_36544	3	64.4183	3	108.192	0.0144714	-0.0158747
solcap_snp_sl_67705	3	64.4456	3	108.192	-0.000192828	-4.51e-05
solcap_snp_sl_67663	3	64.5532	3	108.192	-0.000436287	-0.000187012
solcap_snp_sl_67656	3	64.5615	3	108.192	0	0
solcap_snp_sl_36532	3	64.58	3	108.192	0.0203665	-0.0115319
solcap_snp_sl_67626	3	64.7724	3	108.192	-0.000436287	-0.000187012
solcap_snp_sl_45224	4	0.035288	4	0	0.000934402	0.000346437
solcap_snp_sl_45249	4	0.213755	4	0.8226	-0.000293555	0.000318067
SL10952_387	4	0.223026	4	0.8226	-0.000766237	4.83e-06
CL016772-0147_solcap_snp_sl_45273	4	0.313965	4	1.0938	-5.39e-05	0.000457969
solcap_snp_sl_45276	4	0.32382	4	1.3681	-0.000298593	0.000314973
solcap_snp_sl_45301	4	0.445345	4	1.3681	-5.39e-05	0.000457969
solcap_snp_sl_45332	4	0.585828	4	1.6393	-5.39e-05	0.000457969
solcap_snp_sl_63760	4	0.713815	4	3.2925	-0.00634853	-0.000886756
solcap_snp_sl_9832	4	0.741558	4	3.2925	-0.00722011	0.0151831
solcap_snp_sl_63772	4	0.744713	4	3.2925	-5.39e-05	0.000457969
solcap_snp_sl_9834	4	0.744896	4	3.2925	0.00877927	-0.0145187
solcap_snp_sl_63775	4	0.767993	4	3.8467	-0.000293555	0.000318067
solcap_snp_sl_9837	4	0.776335	4	3.8467	0.00784022	-0.0140764
solcap_snp_sl_9838	4	0.776552	4	3.8467	0.0083261	-0.0140612
solcap_snp_sl_9839	4	0.776603	4	3.8467	0.00906416	-0.0135721
solcap_snp_sl_9845	4	0.795442	4	4.118	-0.00328502	0.0132681
solcap_snp_sl_9849	4	0.815054	4	4.118	-0.00197518	0.0140661
solcap_snp_sl_9856	4	0.845964	4	4.6692	0.00811112	-0.0134208
solcap_snp_sl_63814	4	0.983732	4	6.3224	-5.39e-05	0.000457969
solcap_snp_sl_21320	4	0.986628	4	6.3224	-0.00649546	-0.00141182
solcap_snp_sl_21321	4	0.99358	4	6.3224	-0.00649699	-0.00146276
solcap_snp_sl_63852	4	1.12399	4	6.8737	-5.39e-05	0.000457969
solcap_snp_sl_63863	4	1.16189	4	7.6966	-5.39e-05	0.000457969
solcap_snp_sl_63865	4	1.16244	4	7.6966	-5.39e-05	0.000457969
solcap_snp_sl_63870	4	1.16388	4	7.6966	-5.39e-05	0.000457969
solcap_snp_sl_63899	4	1.24245	4	8.2478	-5.39e-05	0.000457969
SGN-U581496_snp423	4	1.37417	4	9.9004	-5.39e-05	0.000457969
solcap_snp_sl_63976	4	1.56249	4	11.8314	-0.000404169	0.00106502
solcap_snp_sl_63996	4	1.70781	4	12.3827	-0.000385889	0.00107522
SGN-U329720_C2_At2g01770_snp317	4	1.71953	4	12.3827	-0.000385889	0.00107522
solcap_snp_sl_64053	4	1.9771	4	13.7582	-0.000707374	0.000155757
solcap_snp_sl_21335	4	2.05082	4	14.5812	0.00560183	-0.0248114
solcap_snp_sl_64082	4	2.14309	4	15.1325	0.00036544	0.000634225
solcap_snp_sl_21339	4	2.20097	4	15.4052	-0.0217305	-0.00761188
solcap_snp_sl_21341	4	2.22848	4	15.4052	-0.0204323	-0.00970048
solcap_snp_sl_21345	4	2.27546	4	15.4052	-0.0150171	-0.00753877
solcap_snp_sl_21346	4	2.2755	4	15.4052	-0.0191214	-0.00770088
solcap_snp_sl_34668	4	2.28162	4	15.4052	-0.0196393	-0.0080369
solcap_snp_sl_34669	4	2.28212	4	15.4052	-0.0205676	-0.00833511
solcap_snp_sl_34670	4	2.28221	4	15.4052	-0.020241	-0.00885672
solcap_snp_sl_34671	4	2.2825	4	15.4052	-0.0195102	-0.00857181
solcap_snp_sl_21347	4	2.28574	4	15.4052	-0.0196297	-0.00795858
solcap_snp_sl_21349	4	2.2861	4	15.4052	-0.0206464	-0.0086166
solcap_snp_sl_21351	4	2.30145	4	15.4052	-0.0193866	-0.00780453
solcap_snp_sl_21352	4	2.30249	4	15.4052	-0.0184062	-0.00723788
solcap_snp_sl_21353	4	2.30576	4	15.4052	-0.020652	-0.00824942
solcap_snp_sl_21354	4	2.33079	4	15.9564	-0.0205421	-0.00813513
solcap_snp_sl_64142	4	2.41358	4	16.7794	-5.57e-05	0.000456884
solcap_snp_sl_34675	4	2.47071	4	17.0507	-0.0175498	-0.00659841
solcap_snp_sl_64171	4	2.56724	4	17.602	-5.32e-05	0.00068201
solcap_snp_sl_64220	4	2.77172	4	19.5339	0.000721953	0.000159265
solcap_snp_sl_21376	4	2.92716	4	20.0852	-0.0219723	-0.00631686
solcap_snp_sl_64250	4	2.93768	4	20.3565	0.000721953	0.000159265
solcap_snp_sl_64263	4	2.99806	4	20.3565	0.000438808	0.00135401
solcap_snp_sl_64272	4	3.04936	4	20.9077	0.000529125	0.000114196
solcap_snp_sl_64295	4	3.17489	4	22.0064	0.001154	0.000161368
solcap_snp_sl_34684	4	3.17498	4	22.0064	-0.00646283	0.0038468
solcap_snp_sl_21385	4	3.21487	4	23.659	-0.0148981	0.00612027
SGN-U577549_snp258	4	3.22049	4	23.9302	0.001154	0.000161368
solcap_snp_sl_64346	4	3.40038	4	24.2029	0.00154575	-0.00110604
solcap_snp_sl_34691	4	3.50267	4	24.4757	-0.00314735	0.0128564
solcap_snp_sl_25082	4	3.5042	4	24.4757	-0.0217067	0.00977105
solcap_snp_sl_64358	4	3.50586	4	24.4757	0.00176779	-0.000949317
SGN-U602014_snp139	4	3.82145	4	26.1282	-0.000593308	0.000444853
solcap_snp_sl_51702	4	4.10324	4	28.0593	0.0015428	-0.00106868
solcap_snp_sl_51721	4	4.43924	4	29.9899	0	0
solcap_snp_sl_41510	4	4.54516	4	29.9899	0.0015935	-0.00109619
solcap_snp_sl_41516	4	4.5861	4	30.5409	0.00179503	-0.00105249
solcap_snp_sl_27161	4	4.63591	4	31.6394	0.0267863	-0.0315973
solcap_snp_sl_27162	4	4.63592	4	31.6394	0.0279601	-0.0310297
solcap_snp_sl_12732	4	4.64779	4	31.6394	-0.0269885	0.0319206
solcap_snp_sl_27167	4	4.832	4	33.8491	-0.0046876	0.0130601
solcap_snp_sl_41552	4	4.83206	4	33.8491	0.00010366	3e-05
CL017744-0091_solcap_snp_sl_41575	4	4.94262	4	33.8491	-0.000389274	-0.000288403
solcap_snp_sl_41577	4	4.9622	4	33.8491	0.00010366	3e-05
SGN-U563666_snp169	4	5.24168	4	34.4003	-0.000378025	-0.000282432
solcap_snp_sl_41609	4	5.29573	4	34.6746	-0.000559285	-0.000708335
solcap_snp_sl_41646	4	5.52042	4	34.9488	-0.00054897	-2.61e-05
solcap_snp_sl_41648	4	5.52647	4	34.9488	-8.84e-05	0.000230995
solcap_snp_sl_16978	4	5.5297	4	34.9488	-0.00458302	-6.69e-05
solcap_snp_sl_16983	4	5.72876	4	35.5	-0.00465037	-0.00147285
solcap_snp_sl_41679	4	5.75847	4	35.5	-0.00462497	-0.00145162
solcap_snp_sl_41683	4	5.86414	4	36.8753	-5.12e-05	0.000295699
solcap_snp_sl_41710	4	6.21974	4	37.4295	0.00040938	0.000552841
solcap_snp_sl_41723	4	6.5264	4	37.7022	0.000184389	0.000433478
solcap_snp_sl_41738	4	6.62472	4	37.7022	0.000184389	0.000433478
solcap_snp_sl_41739	4	6.85681	4	37.9735	0.000169569	0.000412836
solcap_snp_sl_41751	4	7.13435	4	38.5246	-0.000228447	0.000101919
SGN-U574577_snp856_solcap_snp_sl_41764	4	7.18634	4	38.5246	1.41e-05	0.000253851
solcap_snp_sl_1698	4	7.21739	4	38.5246	-0.022435	0.028305
solcap_snp_sl_41782	4	7.3359	4	39.3474	0.00131409	-0.000714269
solcap_snp_sl_17765	4	7.79924	4	39.3474	-0.00324855	-0.00236747
solcap_snp_sl_45951	4	7.96314	4	39.3474	0.00236381	-0.00121681
solcap_snp_sl_17769	4	7.96395	4	39.3474	-0.00268452	-0.00241089
solcap_snp_sl_17770	4	9.49213	4	39.3474	-0.00307515	-0.00269456
solcap_snp_sl_45955	4	9.49304	4	39.3474	0.0029657	-0.00114226
CL017721-0135	4	9.6036	4	39.3474	0.00269095	-0.0010557
solcap_snp_sl_17771	4	9.60811	4	39.3474	-0.00755204	-0.00160863
solcap_snp_sl_58707	4	11.5932	4	39.3474	0.00246852	-0.00120759
solcap_snp_sl_18763	4	13.1423	4	39.6186	-0.00467186	7.91e-05
solcap_snp_sl_51437	4	13.1454	4	39.6186	0.00130147	0.00144871
CL016754-0314_solcap_snp_sl_51429	4	14.103	4	39.6186	0.00143988	0.00125766
solcap_snp_sl_51425	4	16.1298	4	39.6186	0.001689	0.00132461
solcap_snp_sl_5211	4	16.1314	4	39.6186	-0.0150324	0.0290958
solcap_snp_sl_18756	4	17.3999	4	39.6186	-0.00418424	0.000290821
solcap_snp_sl_18755	4	18.1639	4	39.6186	-0.00400207	0.00022077
solcap_snp_sl_51419	4	18.1778	4	39.6186	0.00137491	0.00135975
solcap_snp_sl_51411	4	18.2811	4	39.6186	-0.0042734	0.000194927
solcap_snp_sl_51410	4	18.2811	4	39.6186	0.00174399	0.00139121
solcap_snp_sl_51380	4	21.1707	4	39.6186	0.00171687	0.00141735
solcap_snp_sl_51374	4	21.4105	4	39.6186	0.00137491	0.00135975
solcap_snp_sl_51362	4	22.1904	4	39.6186	0.00137491	0.00135975
solcap_snp_sl_51345	4	23.1853	4	39.6186	0.00146821	0.0013628
solcap_snp_sl_51338	4	23.4359	4	39.6186	0.00132916	0.00146624
solcap_snp_sl_51334	4	23.8575	4	39.6186	0.00137164	0.00143872
solcap_snp_sl_51332	4	25.2637	4	39.6186	0.0014221	0.00147504
solcap_snp_sl_51328	4	25.9197	4	39.6186	0.00137491	0.00135975
SGN-U568735_snp900_solcap_snp_sl_51326	4	26.6041	4	39.6186	0.00111285	0.00142316
solcap_snp_sl_51325	4	27.0451	4	39.6186	0.00111285	0.00142316
solcap_snp_sl_18739	4	28.613	4	39.6186	-0.00359637	0.000759877
solcap_snp_sl_51321	4	28.6132	4	39.6186	0.00137491	0.00135975
solcap_snp_sl_56956	4	29.7037	4	39.6186	0.00146821	0.0013628
CL015243-0410	4	30.6852	4	39.6186	0.00146821	0.0013628
solcap_snp_sl_56974	4	30.8136	4	39.6186	0.0014221	0.00147504
solcap_snp_sl_56978	4	30.9991	4	39.3474	0.00175846	0.00139044
solcap_snp_sl_56983	4	31.0924	4	39.3474	0.00309737	-0.00122554
solcap_snp_sl_56984	4	31.1039	4	39.3474	0.00281069	-0.00125286
solcap_snp_sl_56988	4	31.1618	4	39.3474	0.00287596	-0.00124197
solcap_snp_sl_55261	4	32.6844	4	39.6186	0.00106434	0.0015367
SL10228_484	4	32.8659	4	39.6186	0.00174399	0.00139121
solcap_snp_sl_55257	4	33.2206	4	39.6186	0.00132916	0.00146624
SL10322_127	4	33.4064	4	39.6186	-0.0151031	0.0292802
CL009071-0142	4	33.4065	4	39.6186	0.00146821	0.0013628
SL20028_94	4	35.094	4	39.6186	0.00175846	0.00139044
CL009241-0724	4	35.0955	4	39.6186	0.00111285	0.00142316
solcap_snp_sl_53081	4	35.1095	4	39.6186	0.00111285	0.00142316
solcap_snp_sl_53079	4	36.1439	4	39.6186	0.00195471	0.00144084
solcap_snp_sl_45527	4	38.3545	4	39.6186	0.0014221	0.00147504
SL10347_1497	4	38.8513	4	39.6186	0.00169291	0.00150351
solcap_snp_sl_45521	4	38.8527	4	39.6186	0.00122112	0.00143271
SGN-U563165_snp1866_solcap_snp_sl_45513	4	40.6762	4	39.6186	0.000877381	0.00128536
solcap_snp_sl_45508	4	40.7663	4	39.6186	0.00132916	0.00146624
solcap_snp_sl_17649	4	40.7683	4	39.6186	-0.00508904	-4.54e-05
solcap_snp_sl_45495	4	42.202	4	39.6186	0.000785669	0.00162427
solcap_snp_sl_45491	4	42.5168	4	39.6186	0.000821316	0.00169282
solcap_snp_sl_45487	4	42.7906	4	39.6186	0.000785669	0.00162427
solcap_snp_sl_45480	4	44.0827	4	39.6186	0.000785669	0.00162427
solcap_snp_sl_45473	4	44.8068	4	39.6186	0.000785669	0.00162427
solcap_snp_sl_45469	4	45.6741	4	39.6186	0.000747257	0.00182803
SL10485_525	4	46.5702	4	39.6186	0.000747257	0.00182803
solcap_snp_sl_17641	4	46.7295	4	39.6186	-0.00337699	0.00134044
solcap_snp_sl_45454	4	46.7307	4	39.6186	0.000861966	0.00166648
SGN-U585128_snp513_solcap_snp_sl_45448	4	47.2076	4	39.6186	-0.000178817	0.00115113
solcap_snp_sl_45442	4	47.3933	4	39.6186	0.000551851	0.00139153
CL015174-0292_solcap_snp_sl_45432	4	48.1313	4	39.6186	0.000924559	0.00114499
solcap_snp_sl_45430	4	48.1317	4	39.6186	0.000549144	0.00147042
solcap_snp_sl_45428	4	48.1329	4	39.6186	0.000740685	0.00136667
solcap_snp_sl_45427	4	48.1347	4	39.6186	-0.000178817	0.00115113
solcap_snp_sl_45424	4	48.2713	4	39.6186	0.000105065	0.0011719
solcap_snp_sl_45410	4	49.2008	4	39.6186	-0.000178817	0.00115113
solcap_snp_sl_45391	4	49.7161	4	39.6186	9.68e-05	0.000468357
solcap_snp_sl_45385	4	49.8715	4	39.6186	0.00058424	0.00239849
solcap_snp_sl_45378	4	49.9939	4	39.8899	0.00222805	0.00440475
solcap_snp_sl_45366	4	50.1292	4	39.8899	-0.000299241	0.000168723
SL10811_116	4	50.272	1	81.6151	-0.000226109	0.000360671	x
solcap_snp_sl_57877	4	50.5836	4	40.7128	2.09e-05	0.00025815
CL017504-0128_solcap_snp_sl_57871	4	50.8705	4	40.987	0.00040938	0.000552841
solcap_snp_sl_42940	4	50.9372	4	40.987	2.09e-05	0.00025815
solcap_snp_sl_42936	4	51.0287	4	40.987	2.09e-05	0.00025815
SGN-U579429_snp2824_solcap_snp_sl_42933	4	51.0666	4	41.2582	2.09e-05	0.00025815
solcap_snp_sl_42930	4	51.088	4	41.2582	2.09e-05	0.00025815
solcap_snp_sl_42926	4	51.439	4	41.2582	-0.0002916	0.000173666
solcap_snp_sl_42919	4	51.4441	4	41.2582	-0.0002916	0.000173666
solcap_snp_sl_42906	4	51.7068	4	42.3567	9.68e-05	0.000468357
solcap_snp_sl_42872	4	52.1996	4	42.628	-0.000192828	-4.51e-05
solcap_snp_sl_42870	4	52.2128	4	42.628	-0.000192828	-4.51e-05
SGN-U327596_C2_At1g05055_snp79_solcap_snp_sl_42867	4	52.2209	4	42.628	-0.000192828	-4.51e-05
CL016982-0105	4	52.251	4	42.628	0	0
solcap_snp_sl_42850	4	52.4156	4	42.628	-0.0009553	-0.000520958
solcap_snp_sl_42827	4	52.5619	4	42.8992	0	0
CL015899-0460_solcap_snp_sl_42811	4	52.7534	4	43.9977	0	0
solcap_snp_sl_42809	4	52.754	4	43.9977	0	0
CL015342-0114	4	52.8032	4	43.9977	0	0
CL016247-0419_solcap_snp_sl_42805	4	52.818	4	44.5488	0	0
solcap_snp_sl_42792	4	52.9813	4	44.8201	-0.000192828	-4.51e-05
solcap_snp_sl_14103	4	53.2202	4	45.3712	0.00949851	0.00635961
solcap_snp_sl_14104	4	53.2203	4	45.3712	0.00936616	0.0064285
solcap_snp_sl_53139	4	53.3083	4	45.9224	0.00907237	0.0060356
solcap_snp_sl_24133	4	53.6473	4	47.0164	0.0426331	-0.0164194
solcap_snp_sl_24135	4	53.6773	4	47.0164	0.0425447	-0.0165426
SGN-U566573_snp105987	4	53.6835	4	47.0164	0.0428625	-0.0160276
solcap_snp_sl_24140	4	53.6844	4	47.0164	0.0430836	-0.0161149
solcap_snp_sl_53153	4	53.7095	4	47.0164	0.0428435	-0.01577
solcap_snp_sl_24145	4	53.71	4	47.0164	0.0428906	-0.0135224
solcap_snp_sl_24150	4	53.7562	4	47.2877	0.042637	-0.0136181
solcap_snp_sl_24151	4	53.7621	4	47.2877	0.0426376	-0.0131984
solcap_snp_sl_24152	4	53.7789	4	47.2877	0.0426376	-0.0131984
solcap_snp_sl_24613	4	54.0603	4	47.2877	0.0420349	-0.0131333
solcap_snp_sl_58945	4	54.0739	4	47.2877	0.0423676	-0.0134583
solcap_snp_sl_58944	4	54.0743	4	47.2877	0.0421918	-0.0133361
solcap_snp_sl_24610	4	54.1483	4	47.8449	0.0425374	-0.0139179
solcap_snp_sl_24609	4	54.1591	4	47.8449	0.0427221	-0.0134294
solcap_snp_sl_24608	4	54.1593	4	47.8449	0.0427322	-0.0134307
solcap_snp_sl_24606	4	54.194	4	48.1161	0.0406528	-0.0144705
solcap_snp_sl_24604	4	54.1962	4	48.1161	0.040378	-0.0146639
solcap_snp_sl_24600	4	54.1977	4	48.1161	0.0403464	-0.0146715
solcap_snp_sl_24599	4	54.2167	4	48.1161	-0.0399944	0.0147573
solcap_snp_sl_24598	4	54.2167	4	48.1161	-0.0398569	0.0146059
solcap_snp_sl_24596	4	54.2283	4	48.1161	0.040362	-0.0147075
solcap_snp_sl_24594	4	54.2417	4	48.1161	-0.0399355	0.0149359
solcap_snp_sl_58935	4	54.2418	4	48.1161	-0.0396436	0.0147569
solcap_snp_sl_58934	4	54.2478	4	48.1161	0.0419428	-0.0124162
solcap_snp_sl_24593	4	54.2554	4	48.1161	0.0426942	-0.0128258
solcap_snp_sl_58932	4	54.2571	4	48.1161	0.0427497	-0.0132074
solcap_snp_sl_24592	4	54.2572	4	48.1161	0.042586	-0.0127622
solcap_snp_sl_24591	4	54.2573	4	48.1161	0.0423644	-0.0124738
solcap_snp_sl_24590	4	54.2574	4	48.1161	0.0424315	-0.0126228
solcap_snp_sl_24589	4	54.2584	4	48.1161	0.0423644	-0.0124738
solcap_snp_sl_24588	4	54.2585	4	48.1161	0.0426167	-0.0126965
solcap_snp_sl_24585	4	54.2588	4	48.1161	0.0421649	-0.0122597
solcap_snp_sl_24584	4	54.259	4	48.1161	0.0421649	-0.0122597
solcap_snp_sl_24583	4	54.2591	4	48.1161	0.0422874	-0.012847
solcap_snp_sl_58929	4	54.2596	4	48.1161	0.0423644	-0.0124738
solcap_snp_sl_58928	4	54.2596	4	48.1161	0.0423644	-0.0124738
solcap_snp_sl_24582	4	54.2598	4	48.1161	0.0422796	-0.0125704
solcap_snp_sl_24581	4	54.2605	4	48.1161	0.0423721	-0.0127509
solcap_snp_sl_58927	4	54.2607	4	48.1161	0.0423644	-0.0124738
solcap_snp_sl_24580	4	54.2608	4	48.1161	0.0422874	-0.012847
solcap_snp_sl_24579	4	54.261	4	48.1161	0.0423644	-0.0124738
solcap_snp_sl_24578	4	54.2612	4	48.1161	0.0422796	-0.0125704
solcap_snp_sl_24577	4	54.275	4	48.1161	0.0429581	-0.0133905
solcap_snp_sl_24576	4	54.275	4	48.1161	0.0417056	-0.0168712
solcap_snp_sl_24575	4	54.341	4	48.1161	-0.0417382	0.0127776
solcap_snp_sl_58924	4	54.3414	4	48.1161	0.0418945	-0.012475
solcap_snp_sl_24572	4	54.3527	4	48.6703	0.0424452	-0.013256
solcap_snp_sl_24570	4	54.3628	4	48.6703	0.0418945	-0.012475
solcap_snp_sl_24568	4	54.3854	4	48.6703	0.0427082	-0.0121802
solcap_snp_sl_24565	4	54.3889	4	48.6703	0.0428872	-0.0122505
solcap_snp_sl_24564	4	54.3892	4	48.6703	0.0430289	-0.0125261
solcap_snp_sl_24562	4	54.3895	4	48.6703	0.0430316	-0.0126876
solcap_snp_sl_24561	4	54.3897	4	48.6703	0.0423503	-0.0120687
solcap_snp_sl_24560	4	54.39	4	48.6703	0.0427336	-0.012239
solcap_snp_sl_24559	4	54.3901	4	48.6703	0.0427956	-0.0121763
solcap_snp_sl_58920	4	54.4108	4	48.6703	-0.0401343	0.013418
Le011123_364	4	54.4113	4	48.6703	-0.0400551	0.0133167
solcap_snp_sl_58918	4	54.4329	4	48.6703	0.0432153	-0.0126276
solcap_snp_sl_24558	4	54.4433	4	48.6703	-0.0401639	0.0135123
solcap_snp_sl_58917	4	54.4434	4	48.6703	-0.0401693	0.0136498
solcap_snp_sl_24555	4	54.4494	4	48.6703	0.0432853	-0.0133589
solcap_snp_sl_24665	4	54.4688	4	48.6703	0.0426943	-0.0117722
solcap_snp_sl_24664	4	54.469	4	48.6703	0.0430505	-0.0118794
solcap_snp_sl_24660	4	54.47	4	48.6703	0.0430409	-0.0124146
solcap_snp_sl_24649	4	54.5423	4	48.9415	0.0427275	-0.0124025
solcap_snp_sl_24648	4	54.5812	4	48.9415	0.0446653	-0.0113328
solcap_snp_sl_8223	4	54.5919	4	48.9415	-0.0259448	-0.00838292
solcap_snp_sl_24642	4	54.6064	4	48.9415	0.0444786	-0.0106291
solcap_snp_sl_24641	4	54.6066	4	48.9415	0.0448128	-0.0111874
solcap_snp_sl_24640	4	54.6342	4	48.9415	0.0448107	-0.0110378
solcap_snp_sl_24638	4	54.6372	4	48.9415	-0.0423297	0.0122407
solcap_snp_sl_23453	4	54.7511	4	48.9415	0.044711	-0.0106696
solcap_snp_sl_23457	4	54.7534	4	48.9415	-0.044263	0.0105436
solcap_snp_sl_23459	4	54.7541	4	48.9415	0.0444328	-0.010298
solcap_snp_sl_23460	4	54.7543	4	48.9415	0.0446714	-0.010584
solcap_snp_sl_45595	4	54.7544	4	48.9415	-0.044247	0.0106158
solcap_snp_sl_23461	4	54.7877	4	48.9415	0.0446775	-0.010592
solcap_snp_sl_45602	4	54.7979	4	48.9415	0.0446714	-0.010584
solcap_snp_sl_23462	4	54.8041	4	48.9415	0.0448544	-0.0112789
solcap_snp_sl_23463	4	54.8041	4	48.9415	0.0448043	-0.0108574
solcap_snp_sl_23464	4	54.805	4	48.9415	0.0446775	-0.010592
solcap_snp_sl_23466	4	54.8051	4	48.9415	0.0447772	-0.0109615
solcap_snp_sl_23467	4	54.8056	4	48.9415	-0.0444649	0.0109657
solcap_snp_sl_23469	4	54.8452	4	48.9415	0.0446714	-0.010584
solcap_snp_sl_23470	4	54.8452	4	48.9415	0.0446714	-0.010584
solcap_snp_sl_23471	4	54.8456	4	48.9415	0.0446714	-0.010584
solcap_snp_sl_3065	4	54.8459	4	48.9415	-0.0165175	-0.00667825
solcap_snp_sl_23472	4	54.846	4	48.9415	0.0446714	-0.010584
solcap_snp_sl_3066	4	54.865	4	48.9415	-0.0239295	-0.00685499
solcap_snp_sl_23476	4	54.8663	4	49.2157	0.0444691	-0.0103818
solcap_snp_sl_3067	4	54.8904	4	49.2157	-0.0399182	-0.014528
solcap_snp_sl_3068	4	54.8929	4	49.487	-0.0397158	-0.0147302
solcap_snp_sl_23480	4	54.9401	4	49.7582	-0.039523	-0.0146852
solcap_snp_sl_3070	4	54.9404	4	49.7582	-0.0397253	-0.014483
solcap_snp_sl_3071	4	54.9405	4	49.7582	-0.0397253	-0.014483
solcap_snp_sl_3073	4	54.9409	4	49.7582	-0.0397253	-0.014483
solcap_snp_sl_3074	4	54.9416	4	49.7582	-0.039523	-0.0146852
solcap_snp_sl_3075	4	54.9426	4	49.7582	-0.0395135	-0.0146441
solcap_snp_sl_3076	4	54.9428	4	49.7582	-0.0397253	-0.014483
solcap_snp_sl_3078	4	54.9433	4	49.7582	-0.0397253	-0.014483
solcap_snp_sl_3080	4	54.9484	4	49.7582	-0.039523	-0.0146852
solcap_snp_sl_13133	4	55.0866	4	50.3094	-0.0396728	-0.0140567
solcap_snp_sl_3103	4	55.1013	4	50.3094	-0.0396834	-0.0141047
solcap_snp_sl_3104	4	55.1014	4	50.3094	0.0396834	0.0141047
solcap_snp_sl_45616	4	55.1195	4	50.3094	0.0396834	0.0141047
solcap_snp_sl_3106	4	55.1211	4	50.3094	-0.0396834	-0.0141047
solcap_snp_sl_3107	4	55.1215	4	50.3094	0.0396834	0.0141047
solcap_snp_sl_13134	4	55.123	4	50.3094	-0.039481	-0.0143069
solcap_snp_sl_3108	4	55.1599	4	50.8605	-0.0396728	-0.0140567
solcap_snp_sl_28824	4	55.163	4	50.8605	-0.012331	-0.00363989
solcap_snp_sl_3110	4	55.1667	4	50.8605	-0.0394906	-0.0140597
solcap_snp_sl_3111	4	55.205	4	50.8605	0.0396834	0.0141047
solcap_snp_sl_2191	4	55.3741	4	50.8605	-0.0392882	-0.0142619
solcap_snp_sl_2189	4	55.3759	4	50.8605	-0.0392882	-0.0142619
solcap_snp_sl_23303	4	55.4635	4	50.8605	-0.039481	-0.0143069
solcap_snp_sl_2183	4	55.476	4	50.8605	-0.0394906	-0.0140597
solcap_snp_sl_2182	4	55.4761	4	50.8605	-0.0394906	-0.0140597
solcap_snp_sl_2180	4	55.4766	4	50.8605	-0.0394906	-0.0140597
solcap_snp_sl_2179	4	55.477	4	50.8605	-0.0394906	-0.0140597
solcap_snp_sl_2178	4	55.5053	4	50.8605	-0.0375313	-0.0117911
solcap_snp_sl_2177	4	55.5054	4	50.8605	-0.0377165	-0.0115634
solcap_snp_sl_2176	4	55.5097	4	50.8605	-0.037744	-0.0115374
solcap_snp_sl_2175	4	55.5102	4	50.8605	-0.0375539	-0.0117973
solcap_snp_sl_2174	4	55.5104	4	50.8605	-0.0375538	-0.0117918
solcap_snp_sl_2172	4	55.5149	4	50.8605	-0.0377165	-0.0115634
solcap_snp_sl_43589	4	55.6664	4	51.6834	-0.000644578	9.1e-07
CL015209-0303	4	55.8116	4	52.5065	-0.000249392	-0.000156231
solcap_snp_sl_43581	4	55.8393	4	52.5065	-0.000450212	-0.000205544
solcap_snp_sl_12913	4	56.5739	4	55.0212	-0.0253157	-0.000146887
solcap_snp_sl_43455	4	56.6975	4	55.8442	-0.000192828	-4.51e-05
solcap_snp_sl_43439	4	56.7931	4	56.3955	-0.000199027	-4.9e-05
solcap_snp_sl_43402	4	56.9159	4	56.3955	-0.003875	-0.00168422
solcap_snp_sl_43331	4	57.3267	4	60.0203	-0.0297538	0.00303147
CL017373-0593	4	57.3677	4	60.5748	-0.000208476	-0.000213876
solcap_snp_sl_12906	4	57.3808	4	60.5748	-0.0333201	0.00332192
solcap_snp_sl_12905	4	57.3865	4	60.5748	-0.0333201	0.00332192
solcap_snp_sl_12902	4	57.4411	4	60.5748	-0.0295158	0.00505368
solcap_snp_sl_43302	4	57.4415	4	60.5748	-0.000208476	-0.000213876
CL016202-0393	4	57.5028	4	60.5748	-0.000208476	-0.000213876
solcap_snp_sl_11564	4	57.5578	4	60.8461	-0.035614	-0.00662465
solcap_snp_sl_11563	4	57.5578	4	60.8461	-0.035614	-0.00662465
solcap_snp_sl_11562	4	57.5932	4	60.8461	0.0359177	0.00784704
3300_2_293_b_3300_2_283	4	57.6108	4	60.8461	0.0371481	0.00343729
solcap_snp_sl_11545	4	57.6612	4	60.8461	0.03671	0.000390306
solcap_snp_sl_11543	4	57.6933	4	60.8461	-0.0345838	0.000861812
solcap_snp_sl_25693	4	57.7099	4	60.8461	-0.03671	-0.000390306
solcap_snp_sl_69260	4	57.7102	4	60.8461	0.0367153	-6.03e-05
solcap_snp_sl_11536	4	57.7402	4	60.8461	0.03671	0.000390306
solcap_snp_sl_11535	4	57.7402	4	60.8461	0.03671	0.000390306
solcap_snp_sl_11534	4	57.7405	4	60.8461	0.03671	0.000390306
solcap_snp_sl_11533	4	57.7414	4	60.8461	0.03671	0.000390306
solcap_snp_sl_11532	4	57.7728	4	61.1173	-0.0368625	-0.000457861
solcap_snp_sl_11530	4	57.7774	4	61.1173	-0.0368757	-0.000139768
solcap_snp_sl_69255	4	57.8146	4	61.1173	0.0368313	0.000316133
solcap_snp_sl_25690	4	57.817	4	61.1173	0.0368313	0.000316133
solcap_snp_sl_11525	4	57.8261	4	61.1173	-0.0368313	-0.000316133
solcap_snp_sl_11522	4	57.8636	4	61.6689	-0.0368313	-0.000316133
solcap_snp_sl_11520	4	57.8645	4	61.6689	0.0368313	0.000316133
SGN-U318488_C2_At1g78230_snp247	4	57.865	4	61.6689	0.0368625	0.000457861
solcap_snp_sl_11518	4	57.8703	4	61.6689	0.0368313	0.000316133
solcap_snp_sl_11517	4	57.8767	4	61.6689	-0.0368313	-0.000316133
solcap_snp_sl_11515	4	57.8962	4	62.4924	-0.0347827	0.00303275
solcap_snp_sl_11514	4	57.9106	4	62.4924	-0.0379206	-0.00232301
solcap_snp_sl_15930	4	57.9387	4	62.4924	0.0374634	-3.81e-05
solcap_snp_sl_15929	4	57.9395	4	62.4924	-0.0303871	0.00276835
solcap_snp_sl_36809	4	57.9397	4	62.4924	-0.0314698	0.00230663
solcap_snp_sl_15928	4	58.0007	4	62.4924	0.000898512	0.00176261
solcap_snp_sl_36806	4	58.0279	4	63.0441	-0.0377291	-0.00117806
solcap_snp_sl_11512	4	58.0282	4	63.0441	-0.0378012	-0.00171095
solcap_snp_sl_15923	4	58.0474	4	63.0441	-0.0367699	-0.00170022
solcap_snp_sl_11509	4	58.0477	4	63.0441	0.0360976	0.000122326
CL017501-0235	4	58.0842	4	63.3153	0.000496791	0.00150177
solcap_snp_sl_36796	4	58.2939	4	63.5865	-0.000838261	0.00103079
solcap_snp_sl_11456	4	58.3182	4	63.8578	9.36e-05	0.000961344
solcap_snp_sl_22228	4	58.3626	4	64.4125	-0.000362079	0.00109585
solcap_snp_sl_22225	4	58.3654	4	64.4125	-0.000652118	0.00117631
solcap_snp_sl_17921	4	58.694	4	66.0675	-0.00119611	0.00157992
solcap_snp_sl_17922	4	58.6941	4	66.0675	-0.000881217	0.00135563
solcap_snp_sl_29234	4	58.8314	4	68.2816	-0.00213061	-0.00154058
CL017841-0157	4	58.8893	4	68.2816	-0.00199479	-0.00148566
solcap_snp_sl_17936	4	58.9635	4	68.5529	-0.00162055	-0.000988816
solcap_snp_sl_3612	4	59.2149	4	69.1045	-0.00198989	-0.00142626
solcap_snp_sl_29243	4	59.2247	4	69.1045	-0.00229612	-0.00147567
solcap_snp_sl_17956	4	59.393	4	70.2041	-0.0234613	0.000607882
solcap_snp_sl_3687	4	59.4676	4	70.4753	-0.000753924	-0.000647965
solcap_snp_sl_47004	4	59.6748	4	71.5746	-0.000637519	2.95e-05
SL10375_863	4	59.6808	4	71.8459	-0.000637519	2.95e-05
CL009086-0314	4	59.6812	4	71.8459	-0.000637519	2.95e-05
solcap_snp_sl_47019	4	59.7676	4	72.6691	-0.000419743	-0.000394612
solcap_snp_sl_3729	4	59.9671	4	72.9403	-0.0193432	-0.00312871
solcap_snp_sl_47050	4	60.0718	4	73.4919	-0.00233621	-0.00126662
solcap_snp_sl_47079	4	60.2574	4	74.3153	-0.00106145	-0.000366965
solcap_snp_sl_47122	4	60.3969	4	75.4149	-0.00069563	-0.000533591
solcap_snp_sl_3746	4	60.534	4	76.2384	-0.0204617	-0.00309422
solcap_snp_sl_3748	4	60.5419	4	76.2384	-0.0187388	-0.00233967
SGN-U594049_snp94598	4	60.5519	4	76.2384	-0.000842995	-0.00178669
CL015283-0166_solcap_snp_sl_47165	4	60.5528	4	76.2384	-0.00114443	-0.00150647
solcap_snp_sl_47176	4	60.5667	4	76.2384	0.00716154	-0.000319975
solcap_snp_sl_47229	4	60.8201	4	77.0618	0.0100448	-0.00101621
CL017321-0298_solcap_snp_sl_47277	4	61.0909	4	78.7168	-0.00178157	-0.00450199
solcap_snp_sl_47298	4	61.1788	4	78.7168	0.00968809	-0.00171987
CL016705-0146	4	61.1905	4	78.7168	0.00921741	-0.00179714
solcap_snp_sl_47385	4	61.5127	4	80.3717	0.0104064	-0.00140602
solcap_snp_sl_47397	4	61.5366	4	80.643	0.00979876	-0.000693967
CL016896-0356_solcap_snp_sl_47413	4	61.577	4	80.9142	0.0106737	-0.00167912
CL015472-0201	4	61.6884	4	81.7378	0.00941289	0.00086277
solcap_snp_sl_47457	4	61.8534	4	83.1149	0.0110458	0.000315366
solcap_snp_sl_47487	4	61.9542	4	83.6666	0.0107365	-0.000139596
solcap_snp_sl_47540	4	62.1295	4	84.2183	0.0111765	-0.0013445
CL016103-0188	4	62.194	4	84.4895	0.0127466	-0.00252222
solcap_snp_sl_47590	4	62.3108	4	85.8665	0.00995072	0.00226005
solcap_snp_sl_47615	4	62.4224	4	88.0809	0.00670414	0.00219201
CL009139-0412	4	62.4766	4	88.6326	0.0128639	0.00138319
solcap_snp_sl_47629	4	62.5189	4	88.6326	0.012731	0.00158352
solcap_snp_sl_47656	4	62.641	4	89.1843	0.00935899	0.00307389
solcap_snp_sl_3827	4	62.6931	4	89.1843	0.0101805	0.0066674
solcap_snp_sl_3828	4	62.6937	4	89.1843	0.0107193	0.00368277
solcap_snp_sl_47661	4	62.695	4	89.1843	0.0115705	0.00379554
solcap_snp_sl_3829	4	62.6955	4	89.1843	0.0100358	0.00702322
solcap_snp_sl_3830	4	62.6956	4	89.1843	0.0103482	0.00678366
solcap_snp_sl_47662	4	62.6956	4	89.1843	0.0100977	0.0068807
solcap_snp_sl_3832	4	62.7115	4	89.1843	0.0101434	0.00692938
solcap_snp_sl_3838	4	62.739	4	89.1843	0.0102554	0.00652881
solcap_snp_sl_3839	4	62.7425	4	89.1843	0.0100358	0.00702322
solcap_snp_sl_3840	4	62.7668	4	89.1843	0.0102461	0.00673283
solcap_snp_sl_3841	4	62.772	4	89.1843	0.0100358	0.00702322
solcap_snp_sl_3842	4	62.7721	4	89.1843	0.0103482	0.00678366
solcap_snp_sl_3843	4	62.7783	4	89.1843	0.0102397	0.00680657
solcap_snp_sl_3846	4	62.8056	4	89.457	0.0100421	0.00695059
solcap_snp_sl_3847	4	62.8061	4	89.457	0.0100421	0.00695059
solcap_snp_sl_3848	4	62.8061	4	89.457	0.0101286	0.00704466
solcap_snp_sl_3849	4	62.807	4	89.457	0.0101378	0.00700143
solcap_snp_sl_3850	4	62.8073	4	89.457	0.0103185	0.00680622
solcap_snp_sl_3852	4	62.8079	4	89.457	0.0102409	0.00695099
solcap_snp_sl_3854	4	62.8099	4	89.457	0.0101434	0.00692938
solcap_snp_sl_3855	4	62.814	4	89.457	0.0103021	0.00661962
solcap_snp_sl_3857	4	62.8143	4	89.457	0.0107052	0.00598265
solcap_snp_sl_3859	4	62.8171	4	89.457	0.0103538	0.00671042
solcap_snp_sl_3860	4	62.8172	4	89.457	0.0100421	0.00695059
solcap_snp_sl_3861	4	62.8185	4	89.457	0.0100421	0.00695059
solcap_snp_sl_3862	4	62.8201	4	89.457	0.0103538	0.00671042
solcap_snp_sl_3865	4	62.8233	4	89.457	0.0101974	0.00743189
solcap_snp_sl_47694	4	62.8541	4	89.7282	0.0101339	0.00715525
solcap_snp_sl_47695	4	62.855	4	89.7282	0.00110575	0.0074652
solcap_snp_sl_3867	4	62.9044	4	89.9994	0.0101379	0.00824413
solcap_snp_sl_3868	4	62.9137	4	89.9994	0.0102308	0.00822448
solcap_snp_sl_47701	4	62.9298	4	89.9994	0.00939065	0.00786239
solcap_snp_sl_47708	4	62.9451	4	89.9994	0.00906924	-0.00273693
solcap_snp_sl_3871	4	62.9452	4	89.9994	0.0093751	0.00752751
solcap_snp_sl_3872	4	62.9453	4	89.9994	0.00956942	0.00716694
solcap_snp_sl_3878	4	62.9514	4	89.9994	0.00959764	0.00768331
solcap_snp_sl_3880	4	62.9542	4	89.9994	0.00960455	0.00762113
solcap_snp_sl_3885	4	62.9732	4	89.9994	0.00932046	0.00785577
solcap_snp_sl_3886	4	62.9757	4	89.9994	0.00899646	0.00313054
solcap_snp_sl_3888	4	62.9863	4	89.9994	0.00932046	0.00785577
solcap_snp_sl_3890	4	62.9888	4	89.9994	0.00952449	0.00763831
solcap_snp_sl_47713	4	62.9896	4	89.9994	0.00863937	-0.00166332
solcap_snp_sl_3894	4	62.9964	4	89.9994	0.00914975	0.00762601
solcap_snp_sl_3895	4	62.9984	4	89.9994	0.00974392	0.00740046
solcap_snp_sl_3896	4	62.9999	4	89.9994	0.00940569	0.00793939
SGN-U574978_snp62653	4	63.0033	4	89.9994	0.00960964	0.00772275
solcap_snp_sl_3897	4	63.0054	4	89.9994	0.00941304	0.00787879
solcap_snp_sl_3900	4	63.0268	4	89.9994	0.00949846	0.00796084
solcap_snp_sl_3902	4	63.0324	4	89.9994	0.00961105	0.00753409
solcap_snp_sl_3913	4	63.0652	4	89.9994	0.0102566	0.00816783
solcap_snp_sl_3916	4	63.0659	4	89.9994	0.0102566	0.00816783
solcap_snp_sl_3918	4	63.0705	4	89.9994	0.00994872	0.00836499
solcap_snp_sl_3920	4	63.0898	4	89.9994	0.00995491	0.00830946
SGN-U579811_snp2493	4	63.1108	4	89.9994	0.00994872	0.00836499
solcap_snp_sl_3924	4	63.1115	4	89.9994	0.00902071	0.00783001
solcap_snp_sl_3929	4	63.1126	4	89.9994	0.0104233	0.00884544
CL017765-0127_solcap_snp_sl_47732	4	63.1187	4	89.9994	-0.000533068	-0.000565472
solcap_snp_sl_47735	4	63.1233	4	89.9994	-0.000533068	-0.000565472
solcap_snp_sl_47738	4	63.1246	4	89.9994	-0.000533068	-0.000565472
solcap_snp_sl_3940	4	63.1269	4	90.2737	-1.58e-05	0.010127
solcap_snp_sl_47741	4	63.128	4	90.2737	0.00943315	-0.00273285
solcap_snp_sl_3941	4	63.1282	4	90.2737	0.00996016	0.00824272
solcap_snp_sl_47742	4	63.1282	4	90.2737	0.00890054	-0.00214883
solcap_snp_sl_3952	4	63.2144	4	90.2737	0.0103947	0.00794661
solcap_snp_sl_3955	4	63.2573	4	90.5464	0.0102394	0.00852644
solcap_snp_sl_3957	4	63.2576	4	90.5464	0.0109855	0.00833232
solcap_snp_sl_3958	4	63.2577	4	90.5464	0.0107141	0.00869786
solcap_snp_sl_3959	4	63.2577	4	90.5464	0.0107704	0.00853442
solcap_snp_sl_3961	4	63.2579	4	90.5464	0.0107088	0.00875689
solcap_snp_sl_47749	4	63.2582	4	90.5464	0.00996016	0.00824272
solcap_snp_sl_3962	4	63.2585	4	90.5464	0.0107647	0.00858113
solcap_snp_sl_3963	4	63.2585	4	90.5464	0.0111192	0.00824617
SGN-U565045_snp130	4	63.2595	4	90.5464	0.0111657	0.0079975
solcap_snp_sl_3966	4	63.2595	4	90.5464	0.0107145	0.00871072
solcap_snp_sl_3967	4	63.2615	4	90.5464	0.010691	0.00857099
solcap_snp_sl_3968	4	63.2616	4	90.5464	0.0100354	0.00874308
solcap_snp_sl_3969	4	63.2617	4	90.5464	0.00880465	0.00761611
solcap_snp_sl_3970	4	63.267	4	90.5464	0.01121	0.00764255
solcap_snp_sl_3975	4	63.2751	4	90.5464	0.00994174	0.00826022
solcap_snp_sl_47762	4	63.2964	4	90.5464	0.00700853	0.0198744
solcap_snp_sl_47766	4	63.305	4	90.8176	0.00787929	0.0212466
solcap_snp_sl_3976	4	63.3078	4	90.8176	0.00725065	0.0201471
solcap_snp_sl_4000	4	63.3661	4	91.0889	0.00700649	0.0212602
solcap_snp_sl_4002	4	63.3782	4	91.0889	0.00776103	0.0218319
solcap_snp_sl_4004	4	63.3903	4	91.3601	0.00806348	0.0208765
solcap_snp_sl_4005	4	63.3903	4	91.3601	0.00778422	0.0214347
solcap_snp_sl_47780	4	63.3907	4	91.3601	0.00806733	0.0208393
SL10184_638	4	63.3931	4	91.3601	0.00802431	0.0209457
solcap_snp_sl_47782	4	63.3975	4	91.3601	0.00780175	0.0216774
solcap_snp_sl_47783	4	63.3975	4	91.3601	0.00804236	0.0210573
solcap_snp_sl_4011	4	63.4216	4	91.3601	0.00638469	0.0138168
solcap_snp_sl_4017	4	63.4473	4	91.6328	0.0119376	-0.0130925
solcap_snp_sl_4021	4	63.4487	4	91.6328	-0.00616067	0.0203444
solcap_snp_sl_29322	4	63.4518	4	91.6328	-0.00719459	0.0113887
solcap_snp_sl_4024	4	63.4527	4	91.6328	0.000165347	0.0225886
solcap_snp_sl_4026	4	63.4531	4	91.6328	0.00166733	0.0239897
solcap_snp_sl_4027	4	63.4532	4	91.6328	-0.0016349	0.021313
solcap_snp_sl_4028	4	63.4539	4	91.6328	-0.000306989	0.0231452
solcap_snp_sl_29326	4	63.4783	4	91.6328	-0.0297601	-0.00314747
solcap_snp_sl_23589	4	63.4903	4	91.904	0.0304742	0.00406884
solcap_snp_sl_4032	4	63.4995	4	91.904	0.00669209	0.0118879
solcap_snp_sl_4034	4	63.5004	4	91.904	0.0335122	-0.0076992
solcap_snp_sl_23592	4	63.5021	4	91.904	-0.0306444	-0.00457365
solcap_snp_sl_4036	4	63.5121	4	91.904	-0.0306444	-0.00457365
2189_1_103_b	4	63.5122	4	91.904	-0.0306444	-0.00457365
solcap_snp_sl_4038	4	63.5135	4	91.904	0.00456331	0.0234021
solcap_snp_sl_4041	4	63.5231	4	92.1753	0.00422764	0.0233315
solcap_snp_sl_4042	4	63.5268	4	92.1753	0.00385845	0.0239251
CL015421-0322	4	63.5381	4	92.1753	0.00401467	0.0236808
SGN-U579625_snp474	4	63.5517	4	92.1753	0.0248257	0.0027614
solcap_snp_sl_23596	4	63.5569	4	92.1753	0.0252437	-0.00784258
solcap_snp_sl_4051	4	63.5742	4	92.1753	-0.0364971	-0.000653729
solcap_snp_sl_4055	4	63.5775	4	92.1753	-0.0302748	-0.00275276
solcap_snp_sl_47812	4	63.589	4	92.1753	0.00411327	0.0241259
solcap_snp_sl_4058	4	63.6046	4	92.1753	0.00505153	0.0227858
solcap_snp_sl_4059	4	63.6185	4	92.1753	0.00375588	0.0228574
solcap_snp_sl_4067	4	63.6568	4	92.1753	-0.00124929	0.0211867
solcap_snp_sl_4072	4	63.6625	4	92.1753	0.00451575	0.0229616
solcap_snp_sl_4076	4	63.6659	4	92.1753	0.00430861	0.0233457
CL009271-0329	4	63.6725	4	92.1753	-0.00218256	0.0124461
solcap_snp_sl_18055	4	63.6772	4	92.1753	0.0092651	-0.0325994
solcap_snp_sl_18056	4	63.7138	4	92.1753	0.00803741	-0.0331607
solcap_snp_sl_47842	4	63.7461	4	92.1753	0.00455186	0.0220914
solcap_snp_sl_4096	4	63.7463	4	92.1753	0.00455186	0.0220914
solcap_snp_sl_4099	4	63.757	4	92.1753	0.00492468	0.0224052
solcap_snp_sl_4100	4	63.758	4	92.1753	0.00459218	0.0225993
solcap_snp_sl_47843	4	63.76	4	92.1753	0.0045266	0.0237093
solcap_snp_sl_4101	4	63.7697	4	92.1753	0.00510082	0.0229539
solcap_snp_sl_4103	4	63.7957	4	92.4465	0.00683854	0.0105964
solcap_snp_sl_23601	4	63.8043	4	92.4465	0.0219879	-0.0229256
solcap_snp_sl_4110	4	63.8104	4	92.4465	0.00415693	0.0227
solcap_snp_sl_4112	4	63.8131	4	92.4465	0.00399289	0.0227114
solcap_snp_sl_4113	4	63.8138	4	92.4465	0.00498093	0.0224327
solcap_snp_sl_4114	4	63.8175	4	92.4465	0.00572926	0.0230141
solcap_snp_sl_4116	4	63.8225	4	92.4465	0.00444863	0.0225497
solcap_snp_sl_4118	4	63.8349	4	92.4465	0.00537253	0.0219225
solcap_snp_sl_4120	4	63.8391	4	92.4465	0.00515301	0.0227542
solcap_snp_sl_4124	4	63.8607	4	92.7177	0.00517446	0.0229918
solcap_snp_sl_4125	4	63.8643	4	92.7177	0.0044204	0.0231621
solcap_snp_sl_4126	4	63.8663	4	92.9889	0.00436048	0.0219495
Le002822_199	4	63.8671	4	92.9889	0.00436048	0.0219495
solcap_snp_sl_4133	4	63.8817	4	92.9889	0.00510677	0.022303
solcap_snp_sl_4135	4	63.8843	4	92.9889	0.00419922	0.022501
solcap_snp_sl_4137	4	63.887	4	92.9889	0.00587524	0.0232969
solcap_snp_sl_4139	4	63.892	4	92.9889	-0.0105255	0.0149822
solcap_snp_sl_4140	4	63.8924	4	92.9889	0.00515148	0.0237559
solcap_snp_sl_23604	4	63.8941	4	92.9889	0.0209866	-0.0231408
solcap_snp_sl_4144	4	63.9036	4	92.9889	0.00399289	0.0227114
solcap_snp_sl_4147	4	63.9141	4	92.9889	0.00464941	0.0227394
solcap_snp_sl_4148	4	63.918	4	92.9889	0.00464941	0.0227394
solcap_snp_sl_4152	4	63.9213	4	92.9889	0.00464941	0.0227394
solcap_snp_sl_4164	4	63.9646	4	92.9889	0.00378587	0.0229154
solcap_snp_sl_4173	4	64.0257	4	92.9889	0.00382124	0.0227921
solcap_snp_sl_23608	4	64.0401	4	92.9889	0.0246115	-0.0269613
solcap_snp_sl_69219	5	0.108012	5	0	0.000788992	0.00172469
CL015499-0120	5	0.345515	5	0.2712	0.000788992	0.00172469
solcap_snp_sl_69165	5	0.345868	5	0.2712	0.000323005	0.00146488
solcap_snp_sl_69104	5	0.55818	5	1.6482	0.000823659	0.00191834
solcap_snp_sl_69081	5	0.626924	5	1.9195	0.000426164	0.0105997
CL001269-0638	5	0.684857	5	2.1907	-0.000568768	0.0115729
solcap_snp_sl_15899	5	0.708484	5	2.1907	-0.000568768	0.0115729
solcap_snp_sl_69075	5	0.712311	5	2.1907	0.00022887	0.0133455
solcap_snp_sl_15891	5	0.718616	5	2.7423	-0.000568768	0.0115729
solcap_snp_sl_15887	5	0.721808	5	2.7423	-0.000576545	0.0115798
solcap_snp_sl_15885	5	0.722306	5	2.7423	0.00020519	0.0132146
solcap_snp_sl_15881	5	0.730105	5	2.7423	-0.000624292	0.0138178
solcap_snp_sl_15876	5	0.734949	5	3.0136	0.000201155	0.015478
solcap_snp_sl_15875	5	0.736089	5	3.0136	0.000212004	0.0154848
solcap_snp_sl_69059	5	0.819237	5	4.113	0.000841006	0.00167685
SGN-U577019_snp211_solcap_snp_sl_52680	5	1.11012	5	6.0456	0.000969647	0.0022643
SGN-U565001_snp1586_solcap_snp_sl_52697	5	1.1568	5	6.3168	0.000969647	0.0022643
solcap_snp_sl_52699	5	1.18484	5	6.588	0.000990161	0.00226908
SGN-U567719_snp239_solcap_snp_sl_52710	5	1.21119	5	6.588	0.000893747	0.00224654
SGN-U583136_snp1228_solcap_snp_sl_52714	5	1.31125	5	7.1395	0.000893747	0.00224654
solcap_snp_sl_52718	5	1.33751	5	7.4107	0.000893747	0.00224654
solcap_snp_sl_52731	5	1.41725	5	7.4107	0.00119607	0.00247252
SGN-U563626_snp135_solcap_snp_sl_52738	5	1.47829	5	8.234	0.000860748	0.0022394
solcap_snp_sl_52748	5	1.54594	5	9.6102	0.00112845	0.0018211
solcap_snp_sl_52783	5	1.65499	5	10.4334	0.0011305	0.00182237
solcap_snp_sl_52785	5	1.6641	5	10.4334	0.000671812	0.0015155
solcap_snp_sl_52811	5	1.79924	5	11.8099	0.00112845	0.0018211
solcap_snp_sl_19102	5	1.86036	5	12.3615	-0.0125769	-0.00903835
solcap_snp_sl_49234	5	2.0694	5	13.461	0.00106756	0.00173866
SGN-U604757_snp25016	5	2.14216	5	14.5604	0.00112845	0.0018211
SGN-U604757_snp24952	5	2.14222	5	14.5604	0.00112845	0.0018211
SGN-U604757_snp24792	5	2.14238	5	14.5604	0.00108676	0.0017429
solcap_snp_sl_49216	5	2.15174	5	14.5604	0.00112845	0.0018211
solcap_snp_sl_49215	5	2.15211	5	14.5604	0.00112845	0.0018211
solcap_snp_sl_49212	5	2.15259	5	14.5604	0.00112845	0.0018211
solcap_snp_sl_49210	5	2.15307	5	14.5604	0	0
SGN-U566039_snp997	5	2.23129	5	15.6598	0.00108676	0.0017429
solcap_snp_sl_49182	5	2.24642	5	15.6598	0	0
solcap_snp_sl_49127	5	2.53226	5	19.8571	0.00124563	0.00200134
solcap_snp_sl_49084	5	2.66232	5	20.6802	0.00194634	0.000987013
SL10036_213	5	2.80444	5	21.7789	0	0
solcap_snp_sl_49009	5	3.01281	5	22.6019	0.00215508	0.00164142
solcap_snp_sl_49002	5	3.03323	5	22.6019	0.00215508	0.00164142
CL017434-0125	5	3.05963	5	22.6019	0.00212339	0.00158572
solcap_snp_sl_48974	5	3.13044	5	23.1532	0.0017203	0.00164058
CL017464-0100	5	3.41616	5	25.3638	-0.00400875	0.0006637
solcap_snp_sl_23832	5	3.43702	5	25.3638	0.0217958	-0.0148077
CL016098-0151	5	3.44333	5	25.3638	0.0220155	-0.0148486
solcap_snp_sl_23831	5	3.44377	5	25.3638	0.0226894	-0.0173327
solcap_snp_sl_23830	5	3.45461	5	25.6365	0.0222988	-0.0162229
solcap_snp_sl_23829	5	3.45471	5	25.6365	0.0224286	-0.0164599
solcap_snp_sl_23827	5	3.45488	5	25.6365	0.0224166	-0.0164382
solcap_snp_sl_23826	5	3.47754	5	25.9078	0.0224286	-0.0164599
solcap_snp_sl_48924	5	3.49141	5	25.9078	0.0220977	-0.0162872
solcap_snp_sl_23823	5	3.49161	5	25.9078	0.02191	-0.0162502
solcap_snp_sl_23820	5	3.49218	5	25.9078	0.0221034	-0.0162816
solcap_snp_sl_23817	5	3.49549	5	25.9078	0.0223107	-0.0166035
solcap_snp_sl_23814	5	3.49577	5	25.9078	0.0219062	-0.0162062
solcap_snp_sl_23813	5	3.49584	5	25.9078	0.0221775	-0.0166765
solcap_snp_sl_48922	5	3.49821	5	25.9078	0.0221034	-0.0162816
solcap_snp_sl_23812	5	3.50232	5	25.9078	0.0219448	-0.0163315
solcap_snp_sl_23810	5	3.5185	5	25.9078	0.0228903	-0.0167634
solcap_snp_sl_23808	5	3.54854	5	26.4591	0.0223499	-0.0162954
solcap_snp_sl_23807	5	3.58014	5	26.4591	0.0222126	-0.0164674
solcap_snp_sl_23806	5	3.58016	5	26.4591	0.021385	-0.0160748
solcap_snp_sl_23805	5	3.58534	5	26.4591	0.0215451	-0.0161653
solcap_snp_sl_23803	5	3.58574	5	26.4591	0.0215402	-0.0161448
solcap_snp_sl_23797	5	3.62161	5	27.0104	0.0219322	-0.0162796
solcap_snp_sl_48918	5	3.62196	5	27.0104	0.0219322	-0.0162796
solcap_snp_sl_48917	5	3.62245	5	27.0104	0.021969	-0.0164406
solcap_snp_sl_23796	5	3.63739	5	27.0104	0.0209494	-0.016716
solcap_snp_sl_23795	5	3.63743	5	27.0104	0.0217053	-0.016238
solcap_snp_sl_23794	5	3.63813	5	27.0104	0.0219711	-0.0163051
solcap_snp_sl_23793	5	3.6628	5	27.0104	0.0219355	-0.0162834
solcap_snp_sl_23790	5	3.66872	5	27.0104	0.0217351	-0.0162954
solcap_snp_sl_23785	5	3.67192	5	27.0104	0.0230897	-0.017183
solcap_snp_sl_23783	5	3.72022	5	27.8335	0.0352463	-0.0248598
solcap_snp_sl_23782	5	3.73717	5	27.8335	0.0349912	-0.0248209
solcap_snp_sl_23781	5	3.73727	5	27.8335	0.035236	-0.0248635
solcap_snp_sl_23780	5	3.7373	5	27.8335	0.0349912	-0.0248209
solcap_snp_sl_23778	5	3.74867	5	27.8335	0.0349808	-0.0247118
solcap_snp_sl_23777	5	3.74873	5	27.8335	0.0351746	-0.0249075
solcap_snp_sl_23776	5	3.74898	5	27.8335	0.0349926	-0.0247077
solcap_snp_sl_23775	5	3.74911	5	27.8335	0.0349471	-0.0247306
solcap_snp_sl_48914	5	3.75473	5	27.8335	0.0350023	-0.0248167
solcap_snp_sl_23774	5	3.75561	5	27.8335	0.0347435	-0.0246663
solcap_snp_sl_23772	5	3.75638	5	27.8335	0.0349967	-0.0248188
solcap_snp_sl_48912	5	3.75723	5	27.8335	0.0347435	-0.0246663
solcap_snp_sl_48911	5	3.75772	5	27.8335	0.0347435	-0.0246663
solcap_snp_sl_23769	5	3.75803	5	27.8335	0.0351746	-0.0249075
solcap_snp_sl_23768	5	3.75861	5	27.8335	0.0350495	-0.0248258
solcap_snp_sl_48909	5	3.76274	5	27.8335	0.0351872	-0.0247753
solcap_snp_sl_23766	5	3.76388	5	27.8335	0.0350255	-0.0250841
solcap_snp_sl_23765	5	3.76417	5	27.8335	0.0349471	-0.0247306
solcap_snp_sl_23763	5	3.76435	5	27.8335	0.0347435	-0.0246663
solcap_snp_sl_23757	5	3.8072	5	28.1047	0.0351872	-0.0247753
solcap_snp_sl_23756	5	3.82245	5	28.6561	0.0353498	-0.0256402
solcap_snp_sl_23755	5	3.82246	5	28.6561	0.0349843	-0.0247205
CL017677-0317	5	3.82265	5	28.6561	0.0354509	-0.0258908
solcap_snp_sl_23751	5	3.82346	5	28.6561	0.0354408	-0.0258947
solcap_snp_sl_23750	5	3.82383	5	28.6561	0.0352038	-0.0257616
solcap_snp_sl_23749	5	3.82406	5	28.6561	0.0356202	-0.0258291
solcap_snp_sl_13482	5	3.82441	5	28.6561	-0.0288224	0.027768
solcap_snp_sl_23746	5	3.86645	5	28.9274	0.0352173	-0.0247858
solcap_snp_sl_48904	5	3.86967	5	28.9274	0.0352187	-0.0247751
solcap_snp_sl_23743	5	3.87688	5	28.9274	0.0352173	-0.0247858
solcap_snp_sl_23742	5	3.87719	5	28.9274	0.0349774	-0.0247408
solcap_snp_sl_23741	5	3.87726	5	28.9273	0.0327353	-0.0265353
solcap_snp_sl_13481	5	3.89812	5	29.1986	-0.0270577	0.0271497
solcap_snp_sl_48901	5	3.93332	5	29.1986	0.0361867	-0.0254076
solcap_snp_sl_23738	5	3.93452	5	29.1986	0.036297	-0.0263399
solcap_snp_sl_23737	5	3.93453	5	29.1986	0.0366183	-0.026466
solcap_snp_sl_23736	5	3.94768	5	29.1986	-0.027038	0.0273568
solcap_snp_sl_48900	5	3.94842	5	29.1986	0.0365474	-0.026394
solcap_snp_sl_48898	5	3.94936	5	29.1986	0.0361093	-0.0253386
solcap_snp_sl_23735	5	3.95667	5	29.4698	0.0361093	-0.0253386
solcap_snp_sl_23734	5	3.98085	5	29.4698	0.0358581	-0.0252863
solcap_snp_sl_23733	5	3.9873	5	29.4698	0.0358422	-0.0252917
solcap_snp_sl_23731	5	3.98766	5	29.4698	0.0358581	-0.0252863
solcap_snp_sl_23726	5	4.03584	5	29.741	0.0357821	-0.0264834
solcap_snp_sl_29483	5	4.03713	5	29.741	-0.0144927	-0.00472827
solcap_snp_sl_23721	5	4.05896	5	30.8522	0.0156912	-0.0138197
solcap_snp_sl_29482	5	4.06623	5	30.8522	-0.0144204	-0.00418935
solcap_snp_sl_23717	5	4.06641	5	30.8522	0.0156135	-0.0137414
solcap_snp_sl_29481	5	4.06991	5	30.8522	-0.0158858	-0.00471617
solcap_snp_sl_23712	5	4.13142	5	31.4035	0.0137606	-0.0137421
solcap_snp_sl_29479	5	4.13151	5	31.4035	-0.0106034	-8.4e-06
solcap_snp_sl_48888	5	4.14654	5	31.6747	0.0128	-0.0133556
solcap_snp_sl_23711	5	4.149	5	31.6747	0.0120984	-0.0135557
solcap_snp_sl_23709	5	4.15003	5	31.6747	0.0125543	-0.0132031
solcap_snp_sl_23707	5	4.15249	5	31.6747	0.0122343	-0.0125427
solcap_snp_sl_23706	5	4.15283	5	31.6747	0.0122854	-0.0131222
solcap_snp_sl_23705	5	4.15313	5	31.6747	0.0123038	-0.0131576
solcap_snp_sl_23702	5	4.15794	5	31.6747	0.0125543	-0.0132031
solcap_snp_sl_23695	5	4.16493	5	31.6747	0.0125011	-0.0134099
solcap_snp_sl_23690	5	4.17778	5	31.9459	0.0126419	-0.0132153
solcap_snp_sl_23687	5	4.21501	5	32.2172	0.0128007	-0.0135006
SGN-U566706_snp619_solcap_snp_sl_48880	5	4.27803	5	33.6	0.00164397	-0.000723196
solcap_snp_sl_48843	5	4.49818	5	34.4273	0.00122245	-0.000808288
CL015710-0349	5	4.52256	5	34.4273	0.0014751	-0.000806887
solcap_snp_sl_48839	5	4.70645	5	34.9784	-0.000687932	-0.00155929
solcap_snp_sl_29473	5	4.82968	5	35.8012	-0.0153479	-0.0109107
solcap_snp_sl_48814	5	4.89183	5	35.8012	0.000893974	-0.00109991
solcap_snp_sl_50687	5	5.06254	5	36.9	-0.000114599	-0.00122863
solcap_snp_sl_50701	5	5.19209	5	37.9987	-0.00222322	-0.00288187
solcap_snp_sl_50718	5	5.30858	5	38.8217	0.00144249	-0.000691322
solcap_snp_sl_50722	5	5.30974	5	38.8217	0.00144249	-0.000691322
CL015186-0095	5	5.3434	5	39.0929	0.00187298	-0.000763097
solcap_snp_sl_50746	5	5.4953	5	39.3641	0.0012043	-0.000830537
solcap_snp_sl_50775	5	5.69554	5	39.9154	0.000365018	-0.00104332
solcap_snp_sl_50783	5	5.76351	5	40.4667	0.000137519	-0.00095116
solcap_snp_sl_50784	5	5.76361	5	40.4667	0.000597684	-0.000693939
solcap_snp_sl_50804	5	5.82721	5	40.738	0.000597684	-0.000693939
solcap_snp_sl_50819	5	5.88782	5	42.114	0.00123894	-0.00146565
CL017209-0588	5	5.94002	5	42.3852	0.00167356	-0.00153945
solcap_snp_sl_5050	5	5.96388	5	42.3852	0.000302933	0.000780283
CL015295-0242	5	5.97277	5	42.3852	0.00269177	-0.00124009
solcap_snp_sl_50844	5	6.03434	5	42.3852	0.00146693	-0.00157987
solcap_snp_sl_50851	5	6.1273	5	42.3852	0.00228081	-0.00116604
CL017150-0184_solcap_snp_sl_50870	5	6.24529	5	42.6564	0.00530335	0.00341047
solcap_snp_sl_50871	5	6.24687	5	42.6564	0.00568739	0.00261332
solcap_snp_sl_50872	5	6.2475	5	42.6564	0.00543057	0.00342574
CL016061-0368	5	6.24758	5	42.6564	0.00545839	0.00342448
solcap_snp_sl_50894	5	6.3831	5	42.6564	0.00566107	0.00261588
solcap_snp_sl_50895	5	6.384	5	42.6564	0.00170248	0.00703399
solcap_snp_sl_50896	5	6.38439	5	42.6564	0.00570024	0.00262051
solcap_snp_sl_50898	5	6.38509	5	42.6564	0.00371836	0.00105974
solcap_snp_sl_50902	5	6.3878	5	42.6564	0.00272487	0.00513481
solcap_snp_sl_50925	5	6.57184	5	43.4797	-0.00355223	0.000254541
solcap_snp_sl_50932	5	6.71058	5	43.7509	-0.00104409	0.00151935
solcap_snp_sl_50940	5	6.93002	5	44.574	9.17e-05	-0.000396204
SGN-U573807_snp385	5	7.35269	5	45.9504	0	0
solcap_snp_sl_50974	5	7.35277	5	45.9504	0	0
solcap_snp_sl_5086	5	7.47375	5	45.9504	0.0134452	-0.0075846
solcap_snp_sl_51002	5	7.53405	5	45.9504	0.0112266	-0.0068561
solcap_snp_sl_51007	5	7.61664	5	45.9504	0.00861831	-0.00330601
solcap_snp_sl_51015	5	7.79606	5	45.9504	0.0193891	-0.00598421
solcap_snp_sl_5092	5	7.82938	5	45.9504	0.0120075	-0.0142378
solcap_snp_sl_51043	5	7.8297	5	45.9504	0.00860352	-0.00347989
solcap_snp_sl_51061	5	7.97247	5	45.9504	0	0
solcap_snp_sl_13798	5	8.15664	5	47.05	0.0318071	-0.0123163
SL10639_108	5	8.21515	5	47.3212	0.0318606	-0.0124684
solcap_snp_sl_51094	5	8.35478	5	47.5925	0.0326075	-0.0132112
solcap_snp_sl_5115	5	9.77539	5	47.8637	-0.0181425	0.00282681
solcap_snp_sl_51118	5	9.82219	5	47.8637	0.0320876	-0.0122492
solcap_snp_sl_51121	5	10.038	5	48.1349	0.0320956	-0.0122543
solcap_snp_sl_51126	5	10.1125	5	48.1349	0.0320495	-0.0121706
solcap_snp_sl_51127	5	10.2949	5	48.1349	0.0320334	-0.0123406
solcap_snp_sl_51134	5	10.5892	5	48.1349	0.0349823	-0.0114388
solcap_snp_sl_51142	5	10.7023	5	48.1349	0.0349823	-0.0114388
solcap_snp_sl_51148	5	10.8351	5	48.1349	0.018094	-0.00596768
CL016021-0379_solcap_snp_sl_51155	5	11.5272	5	48.1349	0.0347122	-0.0113437
solcap_snp_sl_51160	5	11.6026	5	48.1349	0.035049	-0.0115431
solcap_snp_sl_51175	5	11.8989	5	48.1349	0.0349058	-0.0113774
solcap_snp_sl_51181	5	12.5271	5	48.1349	0.0345449	-0.0110786
solcap_snp_sl_51184	5	12.5308	5	48.1349	0.0350379	-0.0115468
solcap_snp_sl_51193	5	12.9806	5	48.1349	0.03425	-0.0113048
solcap_snp_sl_51197	5	13.0504	5	48.1349	0.0310606	-0.0106434
solcap_snp_sl_51200	5	13.087	5	48.1349	0.0350274	-0.0114117
solcap_snp_sl_51201	5	13.1417	5	48.1349	0.0350017	-0.0114575
SL10469_202_CL009113-0189	5	13.1427	5	48.1349	0.0349523	-0.0112746
solcap_snp_sl_51211	5	13.6199	5	48.1349	0.0348893	-0.0114597
solcap_snp_sl_51212	5	14.7192	5	48.1349	0.0349645	-0.0113776
solcap_snp_sl_51220	5	15.2622	5	48.1349	0.0348954	-0.0113807
solcap_snp_sl_51227	5	15.4947	5	48.1349	0.0348893	-0.0114597
solcap_snp_sl_51230	5	16.0377	5	48.1349	0.035049	-0.0115431
solcap_snp_sl_51242	5	16.8407	5	48.1349	0.0348145	-0.0117029
solcap_snp_sl_51244	5	17.6217	5	48.1349	0.0351526	-0.01164
SL10526_469	5	18.7386	5	48.1349	0.0349729	-0.0119416
solcap_snp_sl_51628	5	19.2748	5	48.1349	0.035049	-0.0115431
solcap_snp_sl_51607	5	20.2699	5	48.1349	0.035049	-0.0115431
solcap_snp_sl_51594	5	20.7004	5	48.1349	0.0349823	-0.0114388
solcap_snp_sl_51587	5	22.0716	5	48.1349	0.035049	-0.0115431
solcap_snp_sl_51573	5	22.4038	5	48.1349	0.035049	-0.0115431
solcap_snp_sl_51556	5	22.8285	5	48.1349	0.035049	-0.0115431
solcap_snp_sl_51551	5	23.5395	5	48.1349	0.035049	-0.0115431
solcap_snp_sl_51543	5	23.8772	5	48.1349	0.0353275	-0.0115704
solcap_snp_sl_51538	5	24.2349	5	48.1349	0.0349409	-0.0112777
solcap_snp_sl_67774	5	25.5302	5	48.1349	0.0351278	-0.0114443
solcap_snp_sl_51281	5	26.3497	5	48.1349	0.0349523	-0.0112746
solcap_snp_sl_52238	5	28.9618	5	48.1349	0.0349144	-0.0114094
CL015150-0478_solcap_snp_sl_52240	5	29.0323	5	48.1349	0.0350008	-0.0113628
solcap_snp_sl_52243	5	29.1736	5	48.1349	0.03498	-0.0115127
solcap_snp_sl_52254	5	29.3253	5	48.1349	0.0299415	-0.0114651
solcap_snp_sl_52255	5	29.3638	5	48.1349	0.034786	-0.0114791
solcap_snp_sl_52257	5	30.1684	5	48.1349	0.035049	-0.0115431
solcap_snp_sl_52263	5	30.2399	5	48.1349	0.0349823	-0.0114388
solcap_snp_sl_52269	5	30.5131	5	48.1349	0.0347023	-0.0113466
solcap_snp_sl_52271	5	30.903	5	48.1349	0.0347215	-0.0113766
solcap_snp_sl_52280	5	31.6534	5	48.1349	0.0349634	-0.0114102
solcap_snp_sl_55294	5	32.9513	5	48.1349	0.0347729	-0.011455
solcap_snp_sl_55297	5	33.0811	5	48.1349	0.034786	-0.0114791
solcap_snp_sl_55302	5	35.3978	5	48.1349	0.0347806	-0.0113733
solcap_snp_sl_55309	5	36.2221	5	48.1349	0.0348545	-0.0115097
solcap_snp_sl_55315	5	37.243	5	48.1349	0.0349596	-0.0113077
solcap_snp_sl_55317	5	37.5161	5	48.1349	0.035049	-0.0115431
solcap_snp_sl_55319	5	37.898	5	48.1349	0.0349823	-0.0114388
solcap_snp_sl_55320	5	37.8981	5	48.1349	0.0354586	-0.0117221
solcap_snp_sl_55325	5	39.6513	5	48.1349	0.0348965	-0.0109843
solcap_snp_sl_55326	5	39.7242	5	48.1349	0.035049	-0.0115431
solcap_snp_sl_55328	5	40.1716	5	48.1349	0.0349746	-0.0114069
solcap_snp_sl_55338	5	40.4002	5	48.1349	0.0349746	-0.0114069
solcap_snp_sl_55342	5	41.2138	5	48.1349	0.0347094	-0.0113544
solcap_snp_sl_55344	5	41.3824	5	48.1349	0.0349058	-0.0113774
solcap_snp_sl_55348	5	41.6197	5	48.1349	0.0349058	-0.0113774
solcap_snp_sl_55367	5	42.0472	5	48.1349	0.0349746	-0.0114069
CL017638-0440	5	42.0526	5	48.1349	0.0350234	-0.0112151
solcap_snp_sl_40832	5	44.3125	5	48.1349	0.0349144	-0.0114094
solcap_snp_sl_40839	5	45.4147	5	48.1349	0.0350274	-0.0114117
solcap_snp_sl_40841	5	45.5401	5	48.1349	0.0351439	-0.0114008
solcap_snp_sl_53084	5	45.5806	12	39.4502	-0.000120724	0.000120643	x
solcap_snp_sl_38800	5	48.1532	5	48.1349	0.035049	-0.0115431
solcap_snp_sl_38795	5	48.1542	5	48.1349	0.0348404	-0.0114842
SL10373_526	5	50.8497	5	48.1349	0.0349672	-0.0109034
solcap_snp_sl_69405	5	51.2476	5	48.1349	0.0349698	-0.0115165
solcap_snp_sl_69382	5	54.1269	5	48.1349	0.0352055	-0.0114883
solcap_snp_sl_69381	5	54.2365	5	48.1349	0.0351904	-0.0114063
solcap_snp_sl_45340	5	55.524	5	48.1349	0.0349553	-0.0115631
solcap_snp_sl_56068	5	55.7068	5	48.1349	0.035049	-0.0115431
solcap_snp_sl_56076	5	56.2099	5	48.1349	0.0349596	-0.0113077
solcap_snp_sl_56083	5	56.328	5	48.1349	0.035049	-0.0115431
solcap_snp_sl_56091	5	56.3426	5	48.1349	0.0347467	-0.0116727
solcap_snp_sl_67806	5	56.5384	5	48.1349	4.46e-05	0.000514927
solcap_snp_sl_67804	5	57.1948	5	48.1349	0.0350379	-0.0115468
CL017527-0194	5	57.623	5	48.1349	0.0353151	-0.0116338
solcap_snp_sl_67793	5	57.6324	5	48.1349	0.0349746	-0.0114069
solcap_snp_sl_67790	5	57.7076	5	48.1349	0.0355373	-0.0116826
solcap_snp_sl_51446	5	58.0473	5	48.1349	0.0327557	-0.0146725
solcap_snp_sl_51456	5	58.2391	5	48.4062	4.46e-05	0.000514927
solcap_snp_sl_51459	5	58.2395	5	48.4062	0.025957	-0.0136424
solcap_snp_sl_41311	5	58.4866	5	48.4062	0.0260092	-0.0137461
SL10963_93	5	58.5539	5	48.4062	0.0263175	-0.0138729
solcap_snp_sl_22559	5	58.7671	5	48.4062	0.0420688	-0.0191591
solcap_snp_sl_22560	5	58.7673	5	48.4062	0.0420099	-0.0191968
solcap_snp_sl_22565	5	59.0352	5	48.6774	0.0378657	-0.0061279
solcap_snp_sl_22566	5	59.0353	5	48.6774	0.037815	-0.00530685
solcap_snp_sl_1	5	59.0354	5	48.6774	-0.0227998	0.0118353
solcap_snp_sl_22567	5	59.036	5	48.9486	0.0378684	-0.00556439
Le001857_68	5	59.037	5	48.9486	-0.0380632	0.00554342
solcap_snp_sl_37123	5	59.0372	5	48.9486	0.0387089	-0.00498458
solcap_snp_sl_37125	5	59.0705	5	48.9486	0.0385558	-0.0055683
solcap_snp_sl_22571	5	59.0708	5	48.9486	0.0378256	-0.00522355
solcap_snp_sl_37126	5	59.0708	5	48.9486	0.0386714	-0.00501534
solcap_snp_sl_37127	5	59.2346	5	48.9486	-0.0381387	0.00571271
solcap_snp_sl_22572	5	59.235	5	48.9486	0.0368012	-0.00544413
SGN-U312789_snp112	5	59.2513	5	48.9486	0.03617	-0.00420356
solcap_snp_sl_15	5	59.2558	5	48.9486	0.0364046	-0.00428341
solcap_snp_sl_25829	5	59.3984	5	49.2198	-0.0359344	0.00433785
3155_3_488_b_3155_3_479	5	59.4289	5	49.4911	-0.0361142	0.00423321
3155_3_523_b_3155_3_514	5	59.429	5	49.4911	-0.0360839	0.00395722
3155_3_592_b_3155_3_583	5	59.4291	5	49.4911	0.0361011	-0.00415326
solcap_snp_sl_23	5	59.4292	5	49.4911	0.0358815	-0.00390068
solcap_snp_sl_16133	5	59.4957	5	49.4911	-0.00864927	-0.00633937
CL009170-0127	5	59.6559	5	49.4911	0.0353062	-0.0126106
[truncated: 2,409 more rows]

## Sheet: Table S6
Table S6. Candidates for loci under positive selection between processing and fresh market sub-populations
	Physical Map		Genetic Map (EXPIM 2012)
Marker	Chromosome	Position (Mbp)	Chromosome	Position (cM)	He1	Fst1	P(Simul Fst<sample Fst)
solcap_snp_sl_19068	1	38.2763	1	40.8382	0.086364	0.082192	0.96765
solcap_snp_sl_18635	1	67.0378	1	41.1144	0.091743	0.087558	0.985062
solcap_snp_sl_18634	1	67.3664	1	41.3907	0.090909	0.086758	0.982803
solcap_snp_sl_18627	1	67.5123	1	41.3907	0.09633	0.092166	0.995311
solcap_snp_sl_15707	2	30.7071	2	8.5421	0.436691	0.418179	0.994463
solcap_snp_sl_25449	2	35.8017	2	32.4654	0.294005	0.241582	0.960649
solcap_snp_sl_25448	2	35.8027	2	32.4654	0.295487	0.243179	0.963281
solcap_snp_sl_25421	2	35.9905	2	32.7366	0.27397	0.245314	0.966662
solcap_snp_sl_65977	2	35.9905	2	32.7366	0.279091	0.250642	0.974398
solcap_snp_sl_35771	2	36.0052	2	32.7366	0.28461	0.243873	0.964397
solcap_snp_sl_25420	2	36.0056	2	32.7366	0.281136	0.240221	0.958337
solcap_snp_sl_35755	2	36.299	2	34.1098	0.29516	0.267289	0.991839
solcap_snp_sl_49304	2	36.3655	2	34.1098	0.291629	0.263626	0.988892
solcap_snp_sl_23849	2	36.3657	2	34.1098	0.291629	0.263626	0.988892
solcap_snp_sl_13611	2	37.0431	2	36.0201	0.307318	0.284677	0.995206
solcap_snp_sl_13612	2	37.0433	2	36.0201	0.311799	0.289299	0.997588
solcap_snp_sl_13616	2	37.0436	2	36.0201	0.30555	0.282824	0.993987
solcap_snp_sl_13617	2	37.0438	2	36.0201	0.311799	0.289299	0.997588
solcap_snp_sl_13618	2	37.0438	2	36.0201	0.311799	0.289299	0.997588
solcap_snp_sl_13619	2	37.0439	2	36.0201	0.307318	0.284677	0.995206
solcap_snp_sl_29547	2	37.0445	2	36.0201	0.308333	0.285528	0.995715
solcap_snp_sl_13621	2	37.0565	2	36.0201	0.311799	0.289299	0.997588
solcap_snp_sl_13622	2	37.0566	2	36.0201	0.311799	0.289299	0.997588
solcap_snp_sl_13623	2	37.0568	2	36.0201	0.311818	0.289182	0.997539
solcap_snp_sl_4829	2	41.726	2	53.5955	0.823198	0.815105	0.986171
solcap_snp_sl_4831	2	41.7962	2	53.8667	0.80308	0.768045	0.976504
solcap_snp_sl_14355	3	7.08513	3	24.7852	0.254545	0.251142	0.975071
solcap_snp_sl_55037	3	7.34138	3	26.4314	0.09633	0.092166	0.995311
SGN-U564013_snp1820_solcap_snp_sl_55020	3	7.51844	3	28.0867	0.09633	0.092166	0.995311
solcap_snp_sl_18982	3	48.9325	3	52.8266	0.118182	0.114155	1
solcap_snp_sl_18981	3	48.9327	3	52.8266	0.118182	0.114155	1
solcap_snp_sl_18978	3	48.9622	3	52.8266	0.119266	0.115207	1
SL10322_127	4	33.4064	4	39.6186	0.567628	0.500345	0.962343
solcap_snp_sl_47385	4	61.5127	4	80.3717	0.308295	0.268736	0.979739
solcap_snp_sl_47708	4	62.9451	4	89.9994	0.285654	0.270175	0.993809
solcap_snp_sl_47713	4	62.9896	4	89.9994	0.268116	0.265455	0.990426
solcap_snp_sl_47741	4	63.128	4	90.2737	0.298692	0.270953	0.990394
solcap_snp_sl_47742	4	63.1282	4	90.2737	0.292502	0.239962	0.95789
solcap_snp_sl_29322	4	63.4518	4	91.6328	0.259091	0.255708	0.980799
solcap_snp_sl_23831	5	3.44377	5	25.3638	0.471541	0.450493	1
solcap_snp_sl_23823	5	3.49161	5	25.9078	0.464983	0.405994	0.96796
solcap_snp_sl_23812	5	3.50232	5	25.9078	0.464722	0.40569	0.967625
solcap_snp_sl_23806	5	3.58016	5	26.4591	0.462132	0.393621	0.954578
solcap_snp_sl_23796	5	3.63739	5	27.0104	0.454709	0.432321	0.999889
solcap_snp_sl_23794	5	3.63813	5	27.0104	0.471255	0.430665	0.986762
solcap_snp_sl_23783	5	3.72022	5	27.8335	0.683202	0.643683	0.987849
solcap_snp_sl_23782	5	3.73717	5	27.8335	0.67724	0.636931	0.988956
solcap_snp_sl_23781	5	3.73727	5	27.8335	0.681884	0.642194	0.990779
solcap_snp_sl_23780	5	3.7373	5	27.8335	0.67724	0.636931	0.988956
solcap_snp_sl_23778	5	3.74867	5	27.8335	0.678515	0.63837	0.98947
solcap_snp_sl_23777	5	3.74873	5	27.8335	0.678035	0.642832	0.99099
solcap_snp_sl_23776	5	3.74898	5	27.8335	0.679809	0.639831	0.98998
solcap_snp_sl_23775	5	3.74911	5	27.8335	0.676416	0.635979	0.98861
solcap_snp_sl_48914	5	3.75473	5	27.8335	0.679809	0.639831	0.98998
solcap_snp_sl_23774	5	3.75561	5	27.8335	0.675147	0.634547	0.98808
solcap_snp_sl_23772	5	3.75638	5	27.8335	0.678515	0.63837	0.98947
solcap_snp_sl_48912	5	3.75723	5	27.8335	0.675147	0.634547	0.98808
solcap_snp_sl_48911	5	3.75772	5	27.8335	0.675147	0.634547	0.98808
solcap_snp_sl_23769	5	3.75803	5	27.8335	0.678035	0.642832	0.99099
solcap_snp_sl_23768	5	3.75861	5	27.8335	0.682453	0.642816	0.990984
solcap_snp_sl_48909	5	3.76274	5	27.8335	0.679809	0.639831	0.98998
solcap_snp_sl_23766	5	3.76388	5	27.8335	0.676754	0.64141	0.990518
solcap_snp_sl_23765	5	3.76417	5	27.8335	0.676416	0.635979	0.98861
solcap_snp_sl_23763	5	3.76435	5	27.8335	0.675147	0.634547	0.98808
solcap_snp_sl_23757	5	3.8072	5	28.1047	0.679809	0.639831	0.98998
solcap_snp_sl_23756	5	3.82245	5	28.6561	0.685844	0.673413	0.997786
solcap_snp_sl_23755	5	3.82246	5	28.6561	0.679011	0.638907	0.989659
CL017677-0317	5	3.82265	5	28.6561	0.689914	0.677622	0.995627
solcap_snp_sl_23751	5	3.82346	5	28.6561	0.688538	0.676199	0.995065
solcap_snp_sl_23750	5	3.82383	5	28.6561	0.68633	0.673894	0.997886
solcap_snp_sl_23749	5	3.82406	5	28.6561	0.688538	0.676199	0.995065
solcap_snp_sl_23746	5	3.86645	5	28.9274	0.681884	0.642194	0.990779
solcap_snp_sl_48904	5	3.86967	5	28.9274	0.681121	0.641313	0.990485
solcap_snp_sl_23743	5	3.87688	5	28.9274	0.681884	0.642194	0.990779
solcap_snp_sl_23742	5	3.87719	5	28.9274	0.678515	0.63837	0.98947
solcap_snp_sl_23741	5	3.87726	5	28.9273	0.676525	0.630086	0.986355
solcap_snp_sl_48901	5	3.93332	5	29.1986	0.708829	0.672797	0.983485
solcap_snp_sl_23738	5	3.93452	5	29.1986	0.711903	0.700518	0.998556
solcap_snp_sl_23737	5	3.93453	5	29.1986	0.718967	0.707867	0.974088
solcap_snp_sl_48900	5	3.94842	5	29.1986	0.715435	0.704193	0.97273
solcap_snp_sl_48898	5	3.94936	5	29.1986	0.705461	0.668971	0.980678
solcap_snp_sl_23735	5	3.95667	5	29.4698	0.705461	0.668971	0.980678
solcap_snp_sl_23734	5	3.98085	5	29.4698	0.702093	0.665145	0.977756
solcap_snp_sl_23733	5	3.9873	5	29.4698	0.700649	0.663513	0.988911
solcap_snp_sl_23731	5	3.98766	5	29.4698	0.702093	0.665145	0.977756
solcap_snp_sl_23726	5	4.03584	5	29.741	0.70484	0.693169	0.995768
solcap_snp_sl_48888	5	4.14654	5	31.6747	0.307143	0.279739	0.991616
solcap_snp_sl_23711	5	4.149	5	31.6747	0.304348	0.276803	0.988964
solcap_snp_sl_23709	5	4.15003	5	31.6747	0.305755	0.278282	0.990348
solcap_snp_sl_23707	5	4.15249	5	31.6747	0.291216	0.262872	0.988223
solcap_snp_sl_23706	5	4.15283	5	31.6747	0.299336	0.271585	0.990864
solcap_snp_sl_23705	5	4.15313	5	31.6747	0.297861	0.270035	0.99372
solcap_snp_sl_23702	5	4.15794	5	31.6747	0.305755	0.278282	0.990348
solcap_snp_sl_23695	5	4.16493	5	31.6747	0.307143	0.279739	0.991616
solcap_snp_sl_23690	5	4.17778	5	31.9459	0.30292	0.275303	0.987462
solcap_snp_sl_23687	5	4.21501	5	32.2172	0.30869	0.281272	0.992847
solcap_snp_sl_50898	5	6.38509	5	42.6564	0.084615	0.081081	0.96344
solcap_snp_sl_13798	5	8.15664	5	47.05	0.552754	0.519062	0.98044
SL10639_108	5	8.21515	5	47.3212	0.549802	0.531875	0.987307
solcap_snp_sl_51094	5	8.35478	5	47.5925	0.566946	0.541777	0.988689
solcap_snp_sl_51118	5	9.82219	5	47.8637	0.55574	0.514511	0.977753
solcap_snp_sl_51121	5	10.038	5	48.1349	0.552256	0.510698	0.975411
solcap_snp_sl_51126	5	10.1125	5	48.1349	0.552256	0.510698	0.975411
solcap_snp_sl_51127	5	10.2949	5	48.1349	0.554809	0.505801	0.972288
solcap_snp_sl_51134	5	10.5892	5	48.1349	0.624506	0.589842	0.966226
solcap_snp_sl_51142	5	10.7023	5	48.1349	0.624506	0.589842	0.966226
CL016021-0379_solcap_snp_sl_51155	5	11.5272	5	48.1349	0.617589	0.582262	0.961586
solcap_snp_sl_51160	5	11.6026	5	48.1349	0.625415	0.590828	0.966811
solcap_snp_sl_51175	5	11.8989	5	48.1349	0.618447	0.583192	0.962169
solcap_snp_sl_51181	5	12.5271	5	48.1349	0.61413	0.578472	0.959174
solcap_snp_sl_51184	5	12.5308	5	48.1349	0.62536	0.590471	0.966599
solcap_snp_sl_51200	5	13.087	5	48.1349	0.627273	0.592844	0.967993
solcap_snp_sl_51201	5	13.1417	5	48.1349	0.626337	0.591829	0.9674
SL10469_202_CL009113-0189	5	13.1427	5	48.1349	0.622828	0.587982	0.965111
solcap_snp_sl_51211	5	13.6199	5	48.1349	0.62332	0.582102	0.961486
solcap_snp_sl_51212	5	14.7192	5	48.1349	0.62083	0.584577	0.96303
solcap_snp_sl_51220	5	15.2622	5	48.1349	0.618396	0.582832	0.961944
solcap_snp_sl_51227	5	15.4947	5	48.1349	0.62332	0.582102	0.961486
solcap_snp_sl_51230	5	16.0377	5	48.1349	0.625415	0.590828	0.966811
solcap_snp_sl_51242	5	16.8407	5	48.1349	0.62536	0.590471	0.966599
solcap_snp_sl_51244	5	17.6217	5	48.1349	0.629846	0.595675	0.969622
SL10526_469	5	18.7386	5	48.1349	0.627142	0.612333	0.978454
solcap_snp_sl_51628	5	19.2748	5	48.1349	0.625415	0.590828	0.966811
solcap_snp_sl_51607	5	20.2699	5	48.1349	0.625415	0.590828	0.966811
solcap_snp_sl_51594	5	20.7004	5	48.1349	0.624506	0.589842	0.966226
solcap_snp_sl_51587	5	22.0716	5	48.1349	0.625415	0.590828	0.966811
solcap_snp_sl_51573	5	22.4038	5	48.1349	0.625415	0.590828	0.966811
solcap_snp_sl_51556	5	22.8285	5	48.1349	0.625415	0.590828	0.966811
solcap_snp_sl_51551	5	23.5395	5	48.1349	0.625415	0.590828	0.966811
solcap_snp_sl_51543	5	23.8772	5	48.1349	0.635287	0.601331	0.972768
solcap_snp_sl_51538	5	24.2349	5	48.1349	0.622774	0.587624	0.964894
solcap_snp_sl_67774	5	25.5302	5	48.1349	0.627273	0.592844	0.967993
solcap_snp_sl_51281	5	26.3497	5	48.1349	0.622828	0.587982	0.965111
solcap_snp_sl_52238	5	28.9618	5	48.1349	0.621931	0.58701	0.964522
CL015150-0478_solcap_snp_sl_52240	5	29.0323	5	48.1349	0.621931	0.58701	0.964522
solcap_snp_sl_52243	5	29.1736	5	48.1349	0.622828	0.587982	0.965111
solcap_snp_sl_52255	5	29.3638	5	48.1349	0.621931	0.58701	0.964522
solcap_snp_sl_52257	5	30.1684	5	48.1349	0.625415	0.590828	0.966811
solcap_snp_sl_52263	5	30.2399	5	48.1349	0.624506	0.589842	0.966226
solcap_snp_sl_52269	5	30.5131	5	48.1349	0.617538	0.581901	0.961359
solcap_snp_sl_52271	5	30.903	5	48.1349	0.621047	0.586052	0.963937
solcap_snp_sl_52280	5	31.6534	5	48.1349	0.620995	0.585693	0.963717
solcap_snp_sl_55294	5	32.9513	5	48.1349	0.621047	0.586052	0.963937
solcap_snp_sl_55297	5	33.0811	5	48.1349	0.621931	0.58701	0.964522
solcap_snp_sl_55302	5	35.3978	5	48.1349	0.620177	0.585107	0.963357
solcap_snp_sl_55309	5	36.2221	5	48.1349	0.624506	0.589842	0.966226
solcap_snp_sl_55315	5	37.243	5	48.1349	0.626337	0.591829	0.9674
solcap_snp_sl_55317	5	37.5161	5	48.1349	0.625415	0.590828	0.966811
solcap_snp_sl_55319	5	37.898	5	48.1349	0.624506	0.589842	0.966226
solcap_snp_sl_55320	5	37.8981	5	48.1349	0.637615	0.610183	0.977389
solcap_snp_sl_55325	5	39.6513	5	48.1349	0.619318	0.584136	0.962757
solcap_snp_sl_55326	5	39.7242	5	48.1349	0.625415	0.590828	0.966811
solcap_snp_sl_55328	5	40.1716	5	48.1349	0.621047	0.586052	0.963937
solcap_snp_sl_55338	5	40.4002	5	48.1349	0.621047	0.586052	0.963937
solcap_snp_sl_55342	5	41.2138	5	48.1349	0.620177	0.585107	0.963357
solcap_snp_sl_55344	5	41.3824	5	48.1349	0.618447	0.583192	0.962169
solcap_snp_sl_55348	5	41.6197	5	48.1349	0.618447	0.583192	0.962169
solcap_snp_sl_55367	5	42.0472	5	48.1349	0.621047	0.586052	0.963937
CL017638-0440	5	42.0526	5	48.1349	0.621931	0.58701	0.964522
solcap_snp_sl_40832	5	44.3125	5	48.1349	0.621931	0.58701	0.964522
solcap_snp_sl_40839	5	45.4147	5	48.1349	0.627273	0.592844	0.967993
solcap_snp_sl_40841	5	45.5401	5	48.1349	0.628166	0.593519	0.968385
solcap_snp_sl_38800	5	48.1532	5	48.1349	0.625415	0.590828	0.966811
solcap_snp_sl_38795	5	48.1542	5	48.1349	0.62361	0.58887	0.965645
SL10373_526	5	50.8497	5	48.1349	0.620706	0.578822	0.959399
solcap_snp_sl_69405	5	51.2476	5	48.1349	0.622774	0.587624	0.964894
solcap_snp_sl_69382	5	54.1269	5	48.1349	0.626337	0.591829	0.9674
solcap_snp_sl_69381	5	54.2365	5	48.1349	0.630808	0.59672	0.970215
solcap_snp_sl_45340	5	55.524	5	48.1349	0.62422	0.583096	0.962109
solcap_snp_sl_56068	5	55.7068	5	48.1349	0.625415	0.590828	0.966811
solcap_snp_sl_56076	5	56.2099	5	48.1349	0.626337	0.591829	0.9674
solcap_snp_sl_56083	5	56.328	5	48.1349	0.625415	0.590828	0.966811
solcap_snp_sl_56091	5	56.3426	5	48.1349	0.622774	0.587624	0.964894
solcap_snp_sl_67804	5	57.1948	5	48.1349	0.62536	0.590471	0.966599
CL017527-0194	5	57.623	5	48.1349	0.633356	0.599522	0.971778
solcap_snp_sl_67793	5	57.6324	5	48.1349	0.621047	0.586052	0.963937
solcap_snp_sl_67790	5	57.7076	5	48.1349	0.634881	0.601214	0.972704
solcap_snp_sl_51446	5	58.0473	5	48.1349	0.555336	0.514081	0.977493
solcap_snp_sl_51459	5	58.2395	5	48.4062	0.454611	0.413531	0.991222
solcap_snp_sl_41311	5	58.4866	5	48.4062	0.458103	0.417282	0.9796
SL10963_93	5	58.5539	5	48.4062	0.461242	0.42991	0.990383
solcap_snp_sl_22559	5	58.7671	5	48.4062	0.780226	0.753954	0.982974
solcap_snp_sl_22560	5	58.7673	5	48.4062	0.779562	0.75321	0.982693
CL009170-0127	5	59.6559	5	49.4911	0.659453	0.616726	0.980559
solcap_snp_sl_37155	5	59.8233	5	49.7623	0.679011	0.638907	0.989659
solcap_snp_sl_37167	5	59.912	5	50.314	0.701604	0.669421	0.981014
solcap_snp_sl_27	5	59.9835	5	51.4137	0.880237	0.869095	0.99408
solcap_snp_sl_28	5	59.9848	5	51.4137	0.879562	0.868337	0.994028
solcap_snp_sl_29	5	59.9889	5	51.4137	0.876812	0.865263	0.993816
solcap_snp_sl_30	5	60.0202	5	51.4137	0.873577	0.858962	0.993363
solcap_snp_sl_16140	5	60.1451	5	51.4137	0.864167	0.843751	0.992158
solcap_snp_sl_12181	5	60.1979	5	51.4137	0.862727	0.841964	0.992006
solcap_snp_sl_37	5	60.2184	5	51.6865	0.868542	0.849209	0.992609
solcap_snp_sl_38	5	60.2184	5	51.6865	0.865337	0.845214	0.992281
solcap_snp_sl_39	5	60.2796	5	52.2443	0.853182	0.830068	0.988603
solcap_snp_sl_25838	5	60.2799	5	52.2443	0.856364	0.834033	0.9892
solcap_snp_sl_40	5	60.2827	5	52.2443	0.864756	0.844488	0.992221
solcap_snp_sl_41	5	60.2857	5	52.2443	0.858927	0.837225	0.99159
solcap_snp_sl_42	5	60.2857	5	52.2443	0.864756	0.844488	0.992221
solcap_snp_sl_43	5	60.3066	5	52.2443	0.862132	0.841219	0.991942
solcap_snp_sl_16141	5	60.3073	5	52.2443	0.858927	0.837225	0.99159
solcap_snp_sl_16142	5	60.3075	5	52.2443	0.858927	0.837225	0.99159
solcap_snp_sl_45	5	60.308	5	52.2443	0.858927	0.837225	0.99159
solcap_snp_sl_46	5	60.3081	5	52.2443	0.858927	0.837225	0.99159
solcap_snp_sl_47	5	60.3081	5	52.2443	0.861528	0.840464	0.991876
solcap_snp_sl_49	5	60.3193	5	52.2443	0.862132	0.841219	0.991942
solcap_snp_sl_51	5	60.3288	5	52.5156	0.864756	0.844488	0.992221
solcap_snp_sl_52	5	60.3289	5	52.5156	0.858927	0.837225	0.99159
solcap_snp_sl_53	5	60.329	5	52.5156	0.861528	0.840464	0.991876
solcap_snp_sl_12187	5	60.3303	5	52.5156	0.858927	0.837225	0.99159
solcap_snp_sl_59	5	60.3389	5	52.5156	0.858927	0.837225	0.99159
solcap_snp_sl_60	5	60.3424	5	52.5156	0.862132	0.841219	0.991942
solcap_snp_sl_25841	5	60.3439	5	52.5156	0.856364	0.834033	0.9892
solcap_snp_sl_16145	5	60.3484	5	52.5156	0.8583	0.836441	0.99152
solcap_snp_sl_25842	5	60.3488	5	52.5156	0.859545	0.837998	0.991659
solcap_snp_sl_63	5	60.3718	5	52.5156	0.856364	0.834033	0.9892
solcap_snp_sl_64	5	60.3728	5	52.5156	0.857664	0.835645	0.991448
solcap_snp_sl_66	5	60.3731	5	52.5156	0.862132	0.841219	0.991942
solcap_snp_sl_68	5	60.3779	5	52.5156	0.8583	0.836441	0.99152
solcap_snp_sl_74	5	60.4222	5	53.8929	0.581692	0.555953	0.975845
solcap_snp_sl_22584	5	60.6395	5	54.1641	0.686243	0.634762	0.983654
solcap_snp_sl_37184	5	60.6408	5	54.1641	0.68072	0.624693	0.984128
solcap_snp_sl_22587	5	60.6409	5	54.1641	0.687984	0.636811	0.98466
solcap_snp_sl_22591	5	60.6458	5	54.1641	0.684535	0.632751	0.982644
solcap_snp_sl_22592	5	60.646	5	54.1641	0.690476	0.639777	0.97317
solcap_snp_sl_22594	5	60.6465	5	54.1641	0.690476	0.639777	0.97317
solcap_snp_sl_22596	5	60.6676	5	54.4353	0.680341	0.627784	0.985423
solcap_snp_sl_22597	5	60.6676	5	54.4354	0.686243	0.634762	0.983654
solcap_snp_sl_22602	5	60.678	5	54.7066	0.686243	0.634762	0.983654
solcap_snp_sl_22603	5	60.6781	5	54.7066	0.682409	0.626705	0.984977
solcap_snp_sl_22604	5	60.7232	5	55.5302	0.730668	0.687445	0.966125
solcap_snp_sl_22607	5	60.7548	5	55.5302	0.729032	0.682679	0.964123
solcap_snp_sl_22609	5	60.7797	5	56.0819	0.730668	0.687445	0.966125
solcap_snp_sl_37190	5	60.9592	5	57.4588	0.80761	0.778839	0.979005
solcap_snp_sl_37191	5	60.9601	5	57.4588	0.812317	0.782873	0.979896
solcap_snp_sl_22620	5	61.016	5	58.0135	0.766121	0.731907	0.982158
solcap_snp_sl_22621	5	61.0162	5	58.0135	0.836223	0.811676	0.985572
solcap_snp_sl_37197	5	61.0198	5	58.0135	0.835123	0.810344	0.985335
solcap_snp_sl_22622	5	61.0317	5	58.0135	0.843607	0.820573	0.987094
solcap_snp_sl_22623	5	61.0335	5	58.0135	0.842156	0.821174	0.987193
solcap_snp_sl_37198	5	61.0345	5	58.0135	0.835518	0.812056	0.985639
solcap_snp_sl_37199	5	61.0384	5	58.0135	0.841883	0.82239	0.987392
solcap_snp_sl_37200	5	61.0402	5	58.0135	0.850819	0.831453	0.988814
solcap_snp_sl_25152	6	2.1625	6	6.0458	0.272078	0.243371	0.963591
solcap_snp_sl_12748	6	36.9312	6	31.6435	0.586364	0.584475	0.992437
solcap_snp_sl_12751	6	36.9331	6	31.6435	0.582569	0.580645	0.990225
solcap_snp_sl_12752	6	36.9343	6	31.6435	0.582569	0.580645	0.990225
solcap_snp_sl_12760	6	36.9586	6	31.6435	0.587156	0.585253	0.992862
solcap_snp_sl_12763	6	36.9589	6	31.6435	0.587156	0.585253	0.992862
solcap_snp_sl_5863	7	57.0362	7	41.941	0.755287	0.728276	0.981031
solcap_snp_sl_53378	7	59.6398	7	54.8689	0.095455	0.091324	0.993823
solcap_snp_sl_53298	7	60.0106	7	55.6915	0.086364	0.082192	0.96765
solcap_snp_sl_53288	7	60.0789	7	56.2428	0.087156	0.082949	0.970408
solcap_snp_sl_12158	7	62.2651	7	68.0711	0.114636	0.086665	0.982532
CL015239-0564	7	62.3002	7	68.0711	0.114636	0.086665	0.982532
solcap_snp_sl_12150	7	62.3033	7	68.0711	0.1111	0.083033	0.970709
solcap_snp_sl_12149	7	62.3034	7	68.0711	0.114636	0.086665	0.982532
solcap_snp_sl_71106	7	62.3838	7	68.0711	0.119117	0.091227	0.983049
solcap_snp_sl_12147	7	62.384	7	68.0711	0.115622	0.087633	0.985267
solcap_snp_sl_12146	7	62.3842	7	68.0711	0.119117	0.091227	0.983049
solcap_snp_sl_12145	7	62.3849	7	68.0711	0.119117	0.091227	0.983049
solcap_snp_sl_12140	7	62.3918	7	68.0711	0.1111	0.083033	0.970709
solcap_snp_sl_12139	7	62.392	7	68.0711	0.119117	0.091227	0.983049
solcap_snp_sl_71099	7	62.4055	7	68.0711	0.1111	0.083033	0.970709
solcap_snp_sl_12137	7	62.4086	7	68.3424	0.1111	0.083033	0.970709
solcap_snp_sl_24384	8	0.216751	8	1.0944	0.656331	0.636637	0.98885
solcap_snp_sl_7272	8	0.236771	8	1.0944	0.666008	0.635341	0.988375
solcap_snp_sl_4429	8	50.8118	8	29.0334	0.756009	0.684668	0.964965
solcap_snp_sl_4390	8	51.6667	8	29.3046	0.772041	0.708376	0.974274
solcap_snp_sl_21461	8	58.4929	8	56.8901	0.105505	0.101382	1
solcap_snp_sl_34761	8	58.7891	8	57.7129	0.110155	0.082108	0.967338
solcap_snp_sl_22842	9	2.2105	9	0.8227	0.298692	0.270953	0.990394
solcap_snp_sl_22840	9	2.21382	9	0.8227	0.302224	0.274617	0.986742
solcap_snp_sl_22839	9	2.21389	9	0.8227	0.298692	0.270953	0.990394
solcap_snp_sl_22838	9	2.21403	9	0.8227	0.293676	0.265731	0.990647
solcap_snp_sl_22837	9	2.21774	9	0.8227	0.305755	0.278282	0.990348
solcap_snp_sl_22836	9	2.21777	9	0.8227	0.299336	0.271585	0.990864
solcap_snp_sl_39452	9	4.9104	9	12.219	0.271802	0.247993	0.970678
solcap_snp_sl_31883	9	17.8815	9	22.175	0.109091	0.105023	1
solcap_snp_sl_30380	9	43.1313	9	22.175	0.109091	0.105023	1
solcap_snp_sl_30379	9	44.8207	9	22.175	0.100917	0.096774	0.999834
solcap_snp_sl_29179	9	61.7321	9	35.3901	0.095455	0.091324	0.993823
CL015614-0412	10	0.468921	10	1.3739	0.663443	0.612338	0.978456
solcap_snp_sl_46059	10	0.482363	10	1.3739	0.675007	0.625804	0.984599
solcap_snp_sl_13200	10	1.05843	10	2.4791	0.818052	0.785249	0.980409
solcap_snp_sl_13202	10	1.16389	10	3.0301	0.678602	0.609986	0.97729
solcap_snp_sl_13203	10	1.17573	10	3.0301	0.677805	0.608963	0.976774
solcap_snp_sl_17859	10	2.33551	10	14.3276	0.110155	0.082108	0.967338
solcap_snp_sl_59184	10	61.0518	10	47.1222	0.118182	0.114155	1
solcap_snp_sl_14909	10	61.0633	10	47.1222	0.118182	0.114155	1
solcap_snp_sl_14910	10	61.0635	10	47.1222	0.119266	0.115207	1
solcap_snp_sl_61192	10	62.4877	10	61.5019	0.651669	0.581453	0.961077
solcap_snp_sl_61131	10	62.7554	10	64.2673	0.291667	0.288372	0.999773
SGN-U598818_snp288_solcap_snp_sl_61127	10	62.7699	10	64.2673	0.277273	0.273973	0.995937
solcap_snp_sl_61108	10	62.8111	10	64.5385	0.282407	0.27907	0.998004
solcap_snp_sl_61089	10	62.8653	10	64.8097	0.303738	0.300469	0.999926
solcap_snp_sl_8807	10	64.3121	10	74.7026	0.311129	0.28852	0.997251
solcap_snp_sl_8795	10	64.4467	10	75.5255	0.304697	0.281854	0.993287
Le013158s_161	10	64.4508	10	75.5255	0.281447	0.257874	0.983246
solcap_snp_sl_8787	10	64.5418	10	75.5255	0.30375	0.280938	0.992588
CL017088-0089	11	3.6525	11	26.2878	0.119117	0.091227	0.983049
solcap_snp_sl_20963	11	3.65298	11	26.2878	0.119117	0.091227	0.983049
solcap_snp_sl_20966	11	3.66942	11	26.2878	0.119117	0.091227	0.983049
solcap_snp_sl_20969	11	3.67038	11	26.2878	0.119117	0.091227	0.983049
solcap_snp_sl_20973	11	3.69188	11	26.2878	0.119117	0.091227	0.983049
solcap_snp_sl_20974	11	3.69313	11	26.2878	0.119117	0.091227	0.983049
C2_At2g22570_43_b	11	3.7065	11	26.8393	0.119117	0.091227	0.983049
solcap_snp_sl_20986	11	3.73802	11	26.8393	0.119117	0.091227	0.983049
solcap_snp_sl_20987	11	3.76387	11	27.1105	0.114636	0.086665	0.982532
solcap_snp_sl_20988	11	3.76398	11	27.1105	0.115622	0.087633	0.985267
solcap_snp_sl_20989	11	3.76406	11	27.1105	0.114636	0.086665	0.982532
solcap_snp_sl_20991	11	3.77641	11	27.3817	0.114636	0.086665	0.982532
solcap_snp_sl_20992	11	3.77669	11	27.3817	0.114636	0.086665	0.982532
solcap_snp_sl_20994	11	3.85528	11	27.3817	0.110155	0.082108	0.967338
solcap_snp_sl_21001	11	3.86217	11	27.3817	0.110155	0.082108	0.967338
solcap_snp_sl_21003	11	3.87033	11	27.3817	0.110155	0.082108	0.967338
solcap_snp_sl_21004	11	3.87226	11	27.3817	0.110155	0.082108	0.967338
solcap_snp_sl_21005	11	3.8723	11	27.3817	0.110155	0.082108	0.967338
solcap_snp_sl_30606	11	47.223	11	51.1478	0.539286	0.485851	0.958351
solcap_snp_sl_52284	11	47.2302	11	51.1478	0.446809	0.397807	0.976765
solcap_snp_sl_5620	11	47.2689	11	51.419	0.531782	0.503309	0.97065
solcap_snp_sl_6151	11	47.4117	11	52.2327	0.572527	0.522963	0.978009
solcap_snp_sl_6142	11	47.5022	11	52.2327	0.52699	0.498243	0.967227
solcap_snp_sl_53066	11	47.5412	11	52.2327	0.564415	0.508514	0.968306
solcap_snp_sl_6138	11	47.5428	11	52.2327	0.564415	0.508514	0.968306
solcap_snp_sl_31135	11	47.5429	11	52.2327	0.565012	0.509171	0.968772
solcap_snp_sl_31134	11	47.5429	11	52.2327	0.561245	0.504886	0.97169
solcap_snp_sl_6137	11	47.5432	11	52.2327	0.564415	0.508514	0.968306
solcap_snp_sl_31133	11	47.5553	11	52.2327	0.561245	0.504886	0.97169
solcap_snp_sl_6132	11	47.5832	11	52.2327	0.560121	0.503652	0.970878
solcap_snp_sl_6130	11	47.5954	11	52.2327	0.574206	0.524919	0.979231
solcap_snp_sl_6129	11	47.5955	11	52.2327	0.569346	0.51408	0.972179
solcap_snp_sl_6119	11	47.6688	11	52.784	0.565012	0.509171	0.968772
solcap_snp_sl_32654	12	4.7778	12	34.5039	0.112063	0.083976	0.974001
solcap_snp_sl_19569	12	15.6707	12	39.4502	0.681657	0.581456	0.961078
solcap_snp_sl_25696	unknown	unknown	5	32.2172	0.302224	0.274617	0.986742
solcap_snp_sl_25698	unknown	unknown	5	32.2172	0.310086	0.282739	0.993927
solcap_snp_sl_40829	unknown	unknown	5	48.1349	0.618396	0.582832	0.961944
solcap_snp_sl_69236	unknown	unknown	5	58.0135	0.850604	0.831102	0.988761
1Pairwise estimates of expected heterozygosity and Fst from the Lositan software (Antao et al. 2008)

## Sheet: Table S7
Table S7. Candidates for loci under positive selection between processing and vintage sub-populations
	Physical Map		Genetic Map (EXPIM 2012)
Marker	Chromosome	Position (Mbp)	Chromosome	Position (cM)	He1	Fst1	P(Simul Fst<sample Fst)
solcap_snp_sl_18634	1	67.3664	1	41.3907	0.336066	0.330578	0.990148
solcap_snp_sl_35868	2	35.2968	2	30.8243	0.374101	0.371841	0.999122
SGN-U581789_snp1077_solcap_snp_sl_35846	2	35.3738	2	30.8243	0.375887	0.373666	0.999389
CL016381-0173_solcap_snp_sl_35845	2	35.3743	2	30.8243	0.370504	0.368231	0.998402
solcap_snp_sl_35844	2	35.3913	2	30.8243	0.374101	0.371841	0.999122
solcap_snp_sl_29814	2	38.4204	2	40.9416	0.138298	0.135231	1
solcap_snp_sl_29826	2	38.5341	2	41.2129	0.138298	0.135231	1
solcap_snp_sl_4829	2	41.726	2	53.5955	0.690278	0.674317	0.982614
solcap_snp_sl_63048	3	0.071076	3	0	0.109929	0.106762	0.990149
CL016802-0675	3	0.119273	3	0	0.109929	0.106762	0.990149
CL017202-0450_solcap_snp_sl_63109	3	0.304215	3	0.2712	0.102837	0.099644	0.97105
CL016925-0828	3	0.346009	3	0.8137	0.102837	0.099644	0.97105
solcap_snp_sl_18978	3	48.9622	3	52.8266	0.333333	0.327434	0.988076
solcap_snp_sl_62377	3	57.764	3	75.1005	0.527833	0.495429	0.957244
SL10450_71	3	58.1996	3	77.574	0.564007	0.534075	0.985859
solcap_snp_sl_62270	3	58.3591	3	79.2284	0.56354	0.533587	0.985201
solcap_snp_sl_62228	3	58.5384	3	80.0512	0.53154	0.499379	0.96372
solcap_snp_sl_62209	3	58.6397	3	80.3269	0.538548	0.506873	0.975305
solcap_snp_sl_34668	4	2.28162	4	15.4052	0.533843	0.49714	0.960076
solcap_snp_sl_34670	4	2.28221	4	15.4052	0.5625	0.527649	0.976663
solcap_snp_sl_21347	4	2.28574	4	15.4052	0.53326	0.496582	0.959156
solcap_snp_sl_21354	4	2.33079	4	15.9564	0.526786	0.522523	0.995048
solcap_snp_sl_24140	4	53.6844	4	47.0164	0.82268	0.801627	0.970286
solcap_snp_sl_24145	4	53.71	4	47.0164	0.823712	0.802811	0.971966
solcap_snp_sl_24555	4	54.4494	4	48.6703	0.82739	0.807002	0.97774
solcap_snp_sl_13133	4	55.0866	4	50.3094	0.955972	0.953856	0.961143
solcap_snp_sl_3103	4	55.1013	4	50.3094	0.952738	0.950391	0.959073
solcap_snp_sl_3104	4	55.1014	4	50.3094	0.952738	0.950391	0.959073
solcap_snp_sl_45616	4	55.1195	4	50.3094	0.952738	0.950391	0.959073
solcap_snp_sl_3106	4	55.1211	4	50.3094	0.952738	0.950391	0.959073
solcap_snp_sl_3107	4	55.1215	4	50.3094	0.952738	0.950391	0.959073
solcap_snp_sl_13134	4	55.123	4	50.3094	0.952738	0.950391	0.959073
solcap_snp_sl_3108	4	55.1599	4	50.8605	0.955972	0.953856	0.961143
solcap_snp_sl_3110	4	55.1667	4	50.8605	0.952738	0.950391	0.959073
solcap_snp_sl_3111	4	55.205	4	50.8605	0.952738	0.950391	0.959073
solcap_snp_sl_2191	4	55.3741	4	50.8605	0.952738	0.950391	0.959073
solcap_snp_sl_2189	4	55.3759	4	50.8605	0.952738	0.950391	0.959073
solcap_snp_sl_23303	4	55.4635	4	50.8605	0.952738	0.950391	0.959073
solcap_snp_sl_2183	4	55.476	4	50.8605	0.952738	0.950391	0.959073
solcap_snp_sl_2182	4	55.4761	4	50.8605	0.952738	0.950391	0.959073
solcap_snp_sl_2180	4	55.4766	4	50.8605	0.952738	0.950391	0.959073
solcap_snp_sl_2179	4	55.477	4	50.8605	0.952738	0.950391	0.959073
solcap_snp_sl_43402	4	56.9159	4	56.3955	0.122951	0.115702	1
solcap_snp_sl_11564	4	57.5578	4	60.8461	0.815603	0.814947	0.987706
solcap_snp_sl_11563	4	57.5578	4	60.8461	0.815603	0.814947	0.987706
solcap_snp_sl_11562	4	57.5932	4	60.8461	0.801418	0.800712	0.968975
3300_2_293_b_3300_2_283	4	57.6108	4	60.8461	0.834532	0.833935	0.991606
solcap_snp_sl_11545	4	57.6612	4	60.8461	0.807143	0.806452	0.976999
solcap_snp_sl_25693	4	57.7099	4	60.8461	0.807143	0.806452	0.976999
solcap_snp_sl_69260	4	57.7102	4	60.8461	0.807143	0.806452	0.976999
solcap_snp_sl_11536	4	57.7402	4	60.8461	0.807143	0.806452	0.976999
solcap_snp_sl_11535	4	57.7402	4	60.8461	0.807143	0.806452	0.976999
solcap_snp_sl_11534	4	57.7405	4	60.8461	0.807143	0.806452	0.976999
solcap_snp_sl_11533	4	57.7414	4	60.8461	0.807143	0.806452	0.976999
solcap_snp_sl_11532	4	57.7728	4	61.1173	0.804965	0.80427	0.974008
solcap_snp_sl_11530	4	57.7774	4	61.1173	0.801418	0.800712	0.968975
solcap_snp_sl_69255	4	57.8146	4	61.1173	0.810714	0.810036	0.981722
solcap_snp_sl_25690	4	57.817	4	61.1173	0.810714	0.810036	0.981722
solcap_snp_sl_11525	4	57.8261	4	61.1173	0.810714	0.810036	0.981722
solcap_snp_sl_11522	4	57.8636	4	61.6689	0.810714	0.810036	0.981722
solcap_snp_sl_11520	4	57.8645	4	61.6689	0.810714	0.810036	0.981722
SGN-U318488_C2_At1g78230_snp247	4	57.865	4	61.6689	0.804965	0.80427	0.974008
solcap_snp_sl_11518	4	57.8703	4	61.6689	0.810714	0.810036	0.981722
solcap_snp_sl_11517	4	57.8767	4	61.6689	0.810714	0.810036	0.981722
solcap_snp_sl_15930	4	57.9387	4	62.4924	0.895683	0.895307	0.963107
solcap_snp_sl_36806	4	58.0279	4	63.0441	0.889286	0.888889	0.957349
solcap_snp_sl_11512	4	58.0282	4	63.0441	0.890071	0.88968	0.958071
solcap_snp_sl_11509	4	58.0477	4	63.0441	0.83813	0.837545	0.985503
solcap_snp_sl_3957	4	63.2576	4	90.5464	0.323741	0.3213	0.983333
solcap_snp_sl_3963	4	63.2585	4	90.5464	0.323741	0.3213	0.983333
SGN-U565045_snp130	4	63.2595	4	90.5464	0.328571	0.326165	0.987172
solcap_snp_sl_3967	4	63.2615	4	90.5464	0.317857	0.315412	0.977879
solcap_snp_sl_3970	4	63.267	4	90.5464	0.333333	0.330961	0.990384
solcap_snp_sl_4051	4	63.5742	4	92.1753	0.837635	0.818626	0.967475
CL017464-0100	5	3.41616	5	25.3638	0.116667	0.109244	0.994846
solcap_snp_sl_23756	5	3.82245	5	28.6561	0.68308	0.661538	0.964767
CL017677-0317	5	3.82265	5	28.6561	0.687089	0.665806	0.971046
solcap_snp_sl_23751	5	3.82346	5	28.6561	0.685733	0.664362	0.968951
solcap_snp_sl_23750	5	3.82383	5	28.6561	0.683559	0.662026	0.965497
solcap_snp_sl_23749	5	3.82406	5	28.6561	0.685733	0.664362	0.968951
solcap_snp_sl_48901	5	3.93332	5	29.1986	0.708397	0.671147	0.975809
solcap_snp_sl_23738	5	3.93452	5	29.1986	0.708751	0.689015	0.996798
solcap_snp_sl_23737	5	3.93453	5	29.1986	0.715709	0.696466	1
solcap_snp_sl_48900	5	3.94842	5	29.1986	0.71223	0.69274	0.999512
solcap_snp_sl_48898	5	3.94936	5	29.1986	0.705036	0.667314	0.973198
solcap_snp_sl_23735	5	3.95667	5	29.4698	0.705036	0.667314	0.973198
solcap_snp_sl_23734	5	3.98085	5	29.4698	0.701675	0.663481	0.967658
solcap_snp_sl_23733	5	3.9873	5	29.4698	0.700234	0.661846	0.965228
solcap_snp_sl_23731	5	3.98766	5	29.4698	0.701675	0.663481	0.967658
solcap_snp_sl_23726	5	4.03584	5	29.741	0.701793	0.681565	0.990994
CL017150-0184_solcap_snp_sl_50870	5	6.24529	5	42.6564	0.139286	0.136201	1
solcap_snp_sl_50872	5	6.2475	5	42.6564	0.135036	0.131868	1
solcap_snp_sl_13798	5	8.15664	5	47.05	0.55295	0.522261	0.98565
SL10639_108	5	8.21515	5	47.3212	0.549062	0.518115	0.990063
solcap_snp_sl_51118	5	9.82219	5	47.8637	0.55648	0.526036	0.990919
solcap_snp_sl_51121	5	10.038	5	48.1349	0.55295	0.522261	0.98565
solcap_snp_sl_51126	5	10.1125	5	48.1349	0.55295	0.522261	0.98565
solcap_snp_sl_51127	5	10.2949	5	48.1349	0.55607	0.52561	0.990364
solcap_snp_sl_51446	5	58.0473	5	48.1349	0.55607	0.52561	0.990364
solcap_snp_sl_37155	5	59.8233	5	49.7623	0.684908	0.663463	0.967631
solcap_snp_sl_37167	5	59.912	5	50.314	0.706127	0.685875	0.995023
solcap_snp_sl_51	5	60.3288	5	52.5156	0.895997	0.889584	0.957983
solcap_snp_sl_22604	5	60.7232	5	55.5302	0.918402	0.910615	0.965488
solcap_snp_sl_22620	5	61.016	5	58.0135	0.945336	0.942457	0.954156
solcap_snp_sl_22623	5	61.0335	5	58.0135	0.945336	0.942457	0.954156
solcap_snp_sl_37199	5	61.0384	5	58.0135	0.949063	0.946452	0.956662
solcap_snp_sl_37200	5	61.0402	5	58.0135	0.945609	0.942751	0.954342
solcap_snp_sl_37247	5	61.53	5	61.8985	0.346429	0.344086	0.996472
solcap_snp_sl_19915	6	41.0083	6	50.8576	0.529412	0.524752	0.997345
solcap_snp_sl_31729	6	44.5417	6	63.2009	0.341667	0.336134	0.993236
CL015323-0211	8	56.2232	8	46.4498	0.344345	0.320077	0.982273
solcap_snp_sl_34713	8	56.3556	8	47.2773	0.344825	0.320251	0.982426
solcap_snp_sl_21429	8	57.3362	8	53.32	0.362069	0.356522	0.993987
solcap_snp_sl_21430	8	57.361	8	53.32	0.37069	0.365217	0.997583
solcap_snp_sl_64810	8	58.3075	8	56.339	0.106557	0.099174	0.969553
solcap_snp_sl_21456	8	58.31	8	56.339	0.110169	0.102564	0.979748
solcap_snp_sl_65244	8	60.2759	8	63.7555	0.541772	0.524905	0.997483
solcap_snp_sl_31883	9	17.8815	9	22.175	0.349057	0.342857	0.98434
solcap_snp_sl_30380	9	43.1313	9	22.175	0.333333	0.327434	0.988076
solcap_snp_sl_69927	9	66.827	9	71.0241	0.130276	0.099655	0.971084
CL015904-0285	9	67.3837	9	72.1187	0.339629	0.315648	0.978115
solcap_snp_sl_20950	11	3.55922	11	26.2878	0.67295	0.660854	0.963737
CL017088-0089	11	3.6525	11	26.2878	0.83682	0.830966	0.985461
solcap_snp_sl_20963	11	3.65298	11	26.2878	0.83682	0.830966	0.985461
solcap_snp_sl_20982	11	3.72124	11	26.8393	0.834175	0.828199	0.985416
SL1_00sc6004_2094360_solcap_snp_sl_44897	11	52.2802	11	85.2675	0.364407	0.358974	0.995195
solcap_snp_sl_58718	unknown	unknown	4	55.8442	0.375	0.369748	0.998737
solcap_snp_sl_69236	unknown	unknown	5	58.0135	0.907595	0.897893	0.965361
1Pairwise estimates of expected heterozygosity and Fst from the Lositan software (Antao et al. 2008)

## Sheet: Table S8
Table S8. Candidates for loci under positive selection between fresh market and vintage sub-populations
	Physical Map		Genetic Map (EXPIM 2012)
Marker	Chromosome	Position (Mbp)	Chromosome	Position (cM)	He1	Fst1	P(Simul Fst<sample Fst)
solcap_snp_sl_42213	1	74.3135	1	67.0291	0.095455	0.091324	0.996565
solcap_snp_sl_3067	4	54.8904	4	49.2157	0.658271	0.634649	0.986497
solcap_snp_sl_3068	4	54.8929	4	49.487	0.667064	0.644069	0.990921
solcap_snp_sl_23480	4	54.9401	4	49.7582	0.675857	0.653491	0.994599
solcap_snp_sl_3070	4	54.9404	4	49.7582	0.667064	0.644069	0.990921
solcap_snp_sl_3071	4	54.9405	4	49.7582	0.667064	0.644069	0.990921
solcap_snp_sl_3073	4	54.9409	4	49.7582	0.667064	0.644069	0.990921
solcap_snp_sl_3074	4	54.9416	4	49.7582	0.675857	0.653491	0.994599
solcap_snp_sl_3075	4	54.9426	4	49.7582	0.673034	0.650452	0.993501
solcap_snp_sl_3076	4	54.9428	4	49.7582	0.667064	0.644069	0.990921
solcap_snp_sl_3078	4	54.9433	4	49.7582	0.667064	0.644069	0.990921
solcap_snp_sl_3080	4	54.9484	4	49.7582	0.675857	0.653491	0.994599
solcap_snp_sl_13133	4	55.0866	4	50.3094	0.662668	0.639359	0.988796
solcap_snp_sl_13134	4	55.123	4	50.3094	0.671461	0.64878	0.99286
solcap_snp_sl_3103	4	55.1013	4	50.3094	0.662668	0.639359	0.988796
solcap_snp_sl_3104	4	55.1014	4	50.3094	0.662668	0.639359	0.988796
solcap_snp_sl_3106	4	55.1211	4	50.3094	0.662668	0.639359	0.988796
solcap_snp_sl_3107	4	55.1215	4	50.3094	0.662668	0.639359	0.988796
solcap_snp_sl_45616	4	55.1195	4	50.3094	0.662668	0.639359	0.988796
solcap_snp_sl_2172	4	55.5149	4	50.8605	0.645082	0.620518	0.978668
solcap_snp_sl_2174	4	55.5104	4	50.8605	0.653875	0.629938	0.984036
solcap_snp_sl_2175	4	55.5102	4	50.8605	0.653875	0.629938	0.984036
solcap_snp_sl_2176	4	55.5097	4	50.8605	0.646413	0.621929	0.979508
solcap_snp_sl_2177	4	55.5054	4	50.8605	0.645082	0.620518	0.978668
solcap_snp_sl_2178	4	55.5053	4	50.8605	0.653875	0.629938	0.984036
solcap_snp_sl_2179	4	55.477	4	50.8605	0.671461	0.64878	0.99286
solcap_snp_sl_2180	4	55.4766	4	50.8605	0.671461	0.64878	0.99286
solcap_snp_sl_2182	4	55.4761	4	50.8605	0.671461	0.64878	0.99286
solcap_snp_sl_2183	4	55.476	4	50.8605	0.671461	0.64878	0.99286
solcap_snp_sl_2189	4	55.3759	4	50.8605	0.680253	0.658202	0.996122
solcap_snp_sl_2191	4	55.3741	4	50.8605	0.680253	0.658202	0.996122
solcap_snp_sl_23303	4	55.4635	4	50.8605	0.671461	0.64878	0.99286
solcap_snp_sl_3108	4	55.1599	4	50.8605	0.662668	0.639359	0.988796
solcap_snp_sl_3110	4	55.1667	4	50.8605	0.671461	0.64878	0.99286
solcap_snp_sl_3111	4	55.205	4	50.8605	0.662668	0.639359	0.988796
3300_2_293_b_3300_2_283	4	57.6108	4	60.8461	0.5	0.497717	0.969836
solcap_snp_sl_11533	4	57.7414	4	60.8461	0.463636	0.461187	1
solcap_snp_sl_11534	4	57.7405	4	60.8461	0.463636	0.461187	1
solcap_snp_sl_11535	4	57.7402	4	60.8461	0.463636	0.461187	1
solcap_snp_sl_11536	4	57.7402	4	60.8461	0.463636	0.461187	1
solcap_snp_sl_11545	4	57.6612	4	60.8461	0.463636	0.461187	1
solcap_snp_sl_11562	4	57.5932	4	60.8461	0.563636	0.561644	0.999909
solcap_snp_sl_11563	4	57.5578	4	60.8461	0.572727	0.570776	1
solcap_snp_sl_11564	4	57.5578	4	60.8461	0.572727	0.570776	1
solcap_snp_sl_25693	4	57.7099	4	60.8461	0.463636	0.461187	1
solcap_snp_sl_69260	4	57.7102	4	60.8461	0.453704	0.451163	1
solcap_snp_sl_11525	4	57.8261	4	61.1173	0.463636	0.461187	1
solcap_snp_sl_11530	4	57.7774	4	61.1173	0.449541	0.447005	1
solcap_snp_sl_11532	4	57.7728	4	61.1173	0.463636	0.461187	1
solcap_snp_sl_25690	4	57.817	4	61.1173	0.463636	0.461187	1
solcap_snp_sl_69255	4	57.8146	4	61.1173	0.463636	0.461187	1
SGN-U318488_C2_At1g78230_snp247	4	57.865	4	61.6689	0.463636	0.461187	1
solcap_snp_sl_11517	4	57.8767	4	61.6689	0.463636	0.461187	1
solcap_snp_sl_11518	4	57.8703	4	61.6689	0.463636	0.461187	1
solcap_snp_sl_11520	4	57.8645	4	61.6689	0.463636	0.461187	1
solcap_snp_sl_11522	4	57.8636	4	61.6689	0.463636	0.461187	1
solcap_snp_sl_11514	4	57.9106	4	62.4924	0.513636	0.511416	0.979419
solcap_snp_sl_15930	4	57.9387	4	62.4924	0.470297	0.467662	1
solcap_snp_sl_11509	4	58.0477	4	63.0441	0.459091	0.456621	1
solcap_snp_sl_11512	4	58.0282	4	63.0441	0.5	0.497717	0.969836
solcap_snp_sl_15923	4	58.0474	4	63.0441	0.517884	0.499876	0.971421
solcap_snp_sl_36806	4	58.0279	4	63.0441	0.495413	0.493088	0.966349
solcap_snp_sl_3827	4	62.6931	4	89.1843	0.105505	0.101382	1
solcap_snp_sl_3829	4	62.6955	4	89.1843	0.104545	0.100457	1
solcap_snp_sl_3830	4	62.6956	4	89.1843	0.095455	0.091324	0.996565
solcap_snp_sl_3832	4	62.7115	4	89.1843	0.105505	0.101382	1
solcap_snp_sl_3838	4	62.739	4	89.1843	0.105505	0.101382	1
solcap_snp_sl_3839	4	62.7425	4	89.1843	0.104545	0.100457	1
solcap_snp_sl_3840	4	62.7668	4	89.1843	0.09633	0.092166	0.997714
solcap_snp_sl_3841	4	62.772	4	89.1843	0.104545	0.100457	1
solcap_snp_sl_3842	4	62.7721	4	89.1843	0.095455	0.091324	0.996565
solcap_snp_sl_3843	4	62.7783	4	89.1843	0.095455	0.091324	0.996565
solcap_snp_sl_47662	4	62.6956	4	89.1843	0.104545	0.100457	1
solcap_snp_sl_3846	4	62.8056	4	89.457	0.105505	0.101382	1
solcap_snp_sl_3847	4	62.8061	4	89.457	0.105505	0.101382	1
solcap_snp_sl_3848	4	62.8061	4	89.457	0.1	0.09589	1
solcap_snp_sl_3849	4	62.807	4	89.457	0.104545	0.100457	1
solcap_snp_sl_3850	4	62.8073	4	89.457	0.100917	0.096774	1
solcap_snp_sl_3852	4	62.8079	4	89.457	0.100917	0.096774	1
solcap_snp_sl_3854	4	62.8099	4	89.457	0.105505	0.101382	1
solcap_snp_sl_3855	4	62.814	4	89.457	0.104545	0.100457	1
solcap_snp_sl_3857	4	62.8143	4	89.457	0.09633	0.092166	0.997714
solcap_snp_sl_3859	4	62.8171	4	89.457	0.09633	0.092166	0.997714
solcap_snp_sl_3860	4	62.8172	4	89.457	0.105505	0.101382	1
solcap_snp_sl_3861	4	62.8185	4	89.457	0.105505	0.101382	1
solcap_snp_sl_3862	4	62.8201	4	89.457	0.09633	0.092166	0.997714
solcap_snp_sl_3865	4	62.8233	4	89.457	0.105505	0.101382	1
solcap_snp_sl_47694	4	62.8541	4	89.7282	0.104545	0.100457	1
solcap_snp_sl_4058	4	63.6046	4	92.1753	0.296296	0.293023	0.997907
solcap_snp_sl_4103	4	63.7957	4	92.4465	0.104545	0.100457	1
solcap_snp_sl_50932	5	6.71058	5	43.7509	0.1	0.09589	1
solcap_snp_sl_22592	5	60.646	5	54.1641	0.298497	0.25019	0.954848
solcap_snp_sl_22594	5	60.6465	5	54.1641	0.298497	0.25019	0.954848
solcap_snp_sl_12290	5	62.5963	5	73.9897	0.118182	0.114155	0.999525
solcap_snp_sl_12748	6	36.9312	6	31.6435	0.582045	0.539162	0.971767
solcap_snp_sl_12751	6	36.9331	6	31.6435	0.579862	0.55065	0.986826
solcap_snp_sl_12752	6	36.9343	6	31.6435	0.579862	0.55065	0.986826
solcap_snp_sl_12760	6	36.9586	6	31.6435	0.584298	0.5554	0.98356
solcap_snp_sl_12763	6	36.9589	6	31.6435	0.584298	0.5554	0.98356
solcap_snp_sl_5858	7	57.1553	7	42.4835	0.664198	0.619749	0.978205
solcap_snp_sl_14160	7	58.2091	7	45.5146	0.677846	0.617592	0.976888
solcap_snp_sl_14164	7	58.208	7	45.5146	0.672131	0.610676	0.972487
solcap_snp_sl_14166	7	58.2074	7	45.5146	0.677846	0.617592	0.976888
solcap_snp_sl_14159	7	58.2459	7	45.7858	0.677189	0.614966	0.975249
solcap_snp_sl_53585	7	58.2454	7	45.7858	0.677189	0.614966	0.975249
solcap_snp_sl_14155	7	58.2646	7	46.0571	0.663934	0.600742	0.965721
solcap_snp_sl_14158	7	58.2621	7	46.0571	0.677846	0.617592	0.976888
solcap_snp_sl_53582	7	58.2619	7	46.0571	0.677846	0.617592	0.976888
solcap_snp_sl_53378	7	59.6398	7	54.8689	0.095455	0.091324	0.996565
solcap_snp_sl_53298	7	60.0106	7	55.6915	0.086364	0.082192	0.972616
solcap_snp_sl_53288	7	60.0789	7	56.2428	0.087156	0.082949	0.975253
solcap_snp_sl_3294	10	1.40295	10	6.6142	0.088785	0.084507	0.980359
solcap_snp_sl_46340	10	1.40463	10	6.6142	0.086364	0.082192	0.972616
solcap_snp_sl_14909	10	61.0633	10	47.1222	0.118182	0.114155	0.999525
solcap_snp_sl_14910	10	61.0635	10	47.1222	0.119266	0.115207	0.999813
solcap_snp_sl_59184	10	61.0518	10	47.1222	0.118182	0.114155	0.999525
solcap_snp_sl_61131	10	62.7554	10	64.2673	0.298497	0.25019	0.954848
solcap_snp_sl_20955	11	3.5716	11	26.2878	0.768567	0.697459	0.958405
solcap_snp_sl_20956	11	3.57399	11	26.2878	0.768567	0.697459	0.958405
solcap_snp_sl_20966	11	3.66942	11	26.2878	0.786442	0.726933	0.970698
solcap_snp_sl_20967	11	3.66946	11	26.2878	0.769906	0.700155	0.959789
solcap_snp_sl_20969	11	3.67038	11	26.2878	0.775039	0.708983	0.964205
solcap_snp_sl_20973	11	3.69188	11	26.2878	0.775039	0.708983	0.964205
solcap_snp_sl_20974	11	3.69313	11	26.2878	0.776894	0.711927	0.965639
C2_At2g22570_43_b	11	3.7065	11	26.8393	0.775039	0.708983	0.964205
solcap_snp_sl_20979	11	3.70912	11	26.8393	0.767273	0.695985	0.957642
solcap_snp_sl_20980	11	3.70915	11	26.8393	0.776489	0.71071	0.965049
solcap_snp_sl_20981	11	3.71025	11	26.8393	0.778274	0.713597	0.966442
solcap_snp_sl_20984	11	3.73666	11	26.8393	0.771803	0.703218	0.961341
solcap_snp_sl_20985	11	3.73671	11	26.8393	0.769906	0.700155	0.959789
solcap_snp_sl_20986	11	3.73802	11	26.8393	0.775039	0.708983	0.964205
solcap_snp_sl_34275	11	3.7079	11	26.8393	0.782268	0.719925	0.969428
solcap_snp_sl_20987	11	3.76387	11	27.1105	0.776332	0.711727	0.965542
solcap_snp_sl_20988	11	3.76398	11	27.1105	0.78907	0.73134	0.966808
solcap_snp_sl_20989	11	3.76406	11	27.1105	0.7849	0.725005	0.969607
solcap_snp_sl_20991	11	3.77641	11	27.3817	0.778274	0.714753	0.966995
solcap_snp_sl_20992	11	3.77669	11	27.3817	0.778274	0.714753	0.966995
solcap_snp_sl_20993	11	3.82897	11	27.3817	0.789773	0.73223	0.961155
solcap_snp_sl_20994	11	3.85528	11	27.3817	0.79	0.733456	0.961827
solcap_snp_sl_20995	11	3.8555	11	27.3817	0.793889	0.738683	0.964639
solcap_snp_sl_20996	11	3.85731	11	27.3817	0.794684	0.739967	0.965316
solcap_snp_sl_20998	11	3.86046	11	27.3817	0.794684	0.739967	0.965316
solcap_snp_sl_21001	11	3.86217	11	27.3817	0.79	0.733456	0.961827
solcap_snp_sl_21003	11	3.87033	11	27.3817	0.796591	0.743485	0.967144
solcap_snp_sl_21004	11	3.87226	11	27.3817	0.796591	0.743485	0.967144
solcap_snp_sl_21005	11	3.8723	11	27.3817	0.788213	0.730717	0.96647
solcap_snp_sl_21008	11	3.94789	11	27.9333	0.789773	0.73223	0.961155
solcap_snp_sl_21009	11	3.95029	11	27.9333	0.80042	0.74905	0.969953
solcap_snp_sl_62658	11	3.95204	11	27.9333	0.789773	0.73223	0.961155
solcap_snp_sl_21012	11	4.00277	11	28.2046	0.798305	0.746565	0.968712
solcap_snp_sl_21018	11	4.06099	11	28.7562	0.792313	0.738245	0.964406
solcap_snp_sl_21019	11	4.06125	11	28.7562	0.777966	0.716197	0.967681
solcap_snp_sl_21020	11	4.06155	11	28.7562	0.799922	0.749594	0.970222
solcap_snp_sl_15269	11	5.38948	11	39.3293	0.708636	0.654187	0.974703
solcap_snp_sl_9510	11	5.4407	11	39.3293	0.686441	0.617559	0.965606
solcap_snp_sl_9516	11	5.4715	11	39.8806	0.698165	0.641421	0.963795
solcap_snp_sl_9517	11	5.47189	11	39.8806	0.69439	0.637662	0.960418
solcap_snp_sl_9519	11	5.47262	11	39.8806	0.696742	0.631572	0.954814
solcap_snp_sl_9527	11	5.50508	11	39.8806	0.69439	0.637662	0.960418
solcap_snp_sl_62807	11	5.51987	11	40.1518	0.690254	0.632642	0.976452
solcap_snp_sl_62808	11	5.52005	11	40.1518	0.690254	0.632642	0.976452
solcap_snp_sl_9528	11	5.52176	11	40.1518	0.686118	0.627624	0.972986
solcap_snp_sl_9530	11	5.52265	11	40.1518	0.690254	0.632642	0.976452
solcap_snp_sl_9531	11	5.52657	11	40.1518	0.692623	0.635529	0.958473
solcap_snp_sl_9533	11	5.53408	11	40.1518	0.692623	0.635529	0.958473
solcap_snp_sl_9535	11	5.5421	11	40.1518	0.692623	0.635529	0.958473
solcap_snp_sl_9536	11	5.54218	11	40.1518	0.692623	0.635529	0.958473
solcap_snp_sl_9538	11	5.54911	11	40.1518	0.690254	0.632642	0.976452
solcap_snp_sl_62818	11	5.63684	11	40.7061	0.69439	0.637662	0.960418
solcap_snp_sl_9539	11	5.551	11	40.7061	0.692623	0.635529	0.958473
solcap_snp_sl_9542	11	5.57332	11	40.7061	0.686118	0.627624	0.972986
solcap_snp_sl_9545	11	5.57372	11	40.7061	0.692623	0.635529	0.958473
solcap_snp_sl_9546	11	5.5738	11	40.7061	0.686118	0.627624	0.972986
solcap_snp_sl_9547	11	5.57382	11	40.7061	0.686118	0.627624	0.972986
solcap_snp_sl_9548	11	5.57404	11	40.7061	0.688525	0.630556	0.97503
solcap_snp_sl_9549	11	5.57408	11	40.7061	0.689908	0.63137	0.975588
solcap_snp_sl_9550	11	5.59223	11	40.7061	0.686118	0.627624	0.972986
solcap_snp_sl_9552	11	5.64317	11	40.7061	0.686118	0.627624	0.972986
solcap_snp_sl_9553	11	10.5047	11	40.7061	0.698024	0.642047	0.964351
solcap_snp_sl_9556	11	5.65018	11	40.7061	0.692273	0.63426	0.957307
solcap_snp_sl_9557	11	5.65075	11	40.7061	0.686118	0.627624	0.972986
solcap_snp_sl_9559	11	5.6518	11	40.7061	0.688525	0.630556	0.97503
solcap_snp_sl_9562	11	5.65926	11	40.7061	0.692623	0.635529	0.958473
solcap_snp_sl_31134	11	47.5429	11	52.2327	0.560985	0.501051	0.972273
solcap_snp_sl_31135	11	47.5429	11	52.2327	0.564815	0.506368	0.976024
solcap_snp_sl_5995	11	49.1308	11	57.4471	0.659877	0.614811	0.975151
solcap_snp_sl_5996	11	49.1307	11	57.4471	0.659877	0.614811	0.975151
solcap_snp_sl_5999	11	49.1191	11	57.4471	0.665438	0.602551	0.96699
solcap_snp_sl_6000	11	49.1144	11	57.4471	0.665438	0.602551	0.96699
solcap_snp_sl_6001	11	49.1143	11	57.4471	0.671144	0.609453	0.971681
solcap_snp_sl_6013	11	49.087	11	57.4471	0.669574	0.607563	0.970421
solcap_snp_sl_53030	11	49.1759	11	57.9982	0.651235	0.604939	0.96864
solcap_snp_sl_5987	11	49.2087	11	59.3734	0.65697	0.611519	0.973037
SGN-U321085_C2_At3g44890_snp243	11	49.2764	11	59.9245	0.663934	0.600742	0.965721
solcap_snp_sl_5984	11	49.238	11	59.9245	0.654128	0.608259	0.970887
solcap_snp_sl_2671	11	51.9359	11	82.5144	0.579862	0.55065	0.986826
solcap_snp_sl_2673	11	51.9361	11	82.5144	0.575451	0.50316	0.959027
solcap_snp_sl_2674	11	51.9374	11	82.5144	0.579722	0.549103	0.986134
solcap_snp_sl_2677	11	51.9421	11	82.5144	0.589557	0.561013	0.987112
solcap_snp_sl_2688	11	52.017	11	83.0655	0.531345	0.498695	0.970557
SL1_00sc6004_1941029	11	52.1134	11	83.3413	0.537179	0.504359	0.974627
SL10157_156	11	52.0479	11	83.3413	0.526621	0.49366	0.966786
solcap_snp_sl_2693	11	52.0417	11	83.3413	0.526621	0.49366	0.966786
solcap_snp_sl_2697	11	52.0482	11	83.3413	0.53104	0.497885	0.96996
solcap_snp_sl_2698	11	52.0494	11	83.3413	0.526852	0.493379	0.966572
solcap_snp_sl_2701	11	52.0814	11	83.3413	0.527118	0.494152	0.967161
solcap_snp_sl_2702	11	52.0816	11	83.3413	0.531638	0.498988	0.970772
solcap_snp_sl_44857	11	52.1022	11	83.3413	0.531345	0.498695	0.970557
solcap_snp_sl_2709	11	52.1434	11	84.1733	0.531638	0.498988	0.970772
1Pairwise estimates of expected heterozygosity and Fst from the Lositan software (Antao et al. 2008)

## Sheet: Table S9
Table S9. 28 tomato loci for integration with MAF patterns, PCA loadings, and Fst-outlier detection
Gene	Phenotype	Genbank Accession No.	Flanking Marker	Chromosome	Physical Position (bp)1	Reference
y	Fruit color	EU419748	na	1	71255646	Luo et al. 2008
s	Inflorescence	FJ190663	na	2	36913957	Lippman et al. 2008
lc	Fruit shape and size	JF284938	na	2	41765595	Munos et al. 2011
OVATE	Fruit shape and size	AY140893	na	2	42945331	Liu et al. 2002
fw2.2	Fruit shape and size	AF411809	na	2	46831268	Frary et al. 2000 and Van der Hoeven et al. 2002
Psy1	Fruit color	EF157835	na	3	8606368	Ray et al. 1992 and Yuan et al. 2008
Pto	Disease resistance	LEU02271	na	5	6400973	Martin et al. 1993
Rx3	Disease resistance	na	Rx3L1 and CosOH73	5	62493894-63554544	Yang et al. 2005
SP5	Plant growth habit	AY186736	na	5	63037081	Carmel-Goren et al. 2003 and Jones et al. 2007
Cf-2	Disease resistance	U42444	na	6	2161344	Dixon et al. 1996
Mi1.2	Disease resistance	AF039682	na	6	2722296	Milligan et al. 1998
B	Fruit color	AF254793	na	6	42288127	Ronen et al. 2000
SP	Plant growth habit	U84140	na	6	42361623	Pnueli et al. 1998
SUN	Fruit shape and size	EF094940	na	7	2390456	Xiao et al. 2008
I3	Disease resistance	na	TG170 and TG572	7	60138020-61390557	Hemming et al. 2004 and Scott et al. 2004
gf	Fruit color	EU414632	na	8	60579438	Barry et al. 2008
Ve1	Disease resistance	AF272366	na	9	55478	Kawchuk et al. 2001
Tm2^2	Disease resistance	AF536200	na	9	13621350	Lanfermeijer et al. 2003
Ph-3	Disease resistance	na	TG591 and CT220	9	66783669-67320829	Chunwongse et al. 2002 and Robbins et al. 2010
Sw5	Disease resistance	AY007366	na	9	67301993	Folkertsma et al. 1999 and Spassova et al. 2001
u	Fruit color		na	10	2292143	Powell et al. 2012
Ph-2	Disease resistance	na	CT240 and TG233	10	64519782-64681406	Moreau et al. 1998
j	Inflorescence	AF275345	na	11	3640857	Mao et al. 2000
I	Disease resistance	na	TG523 and TG7	11	3707170-10549327	Scott et al. 2004
Rx-4/Xv3	Disease resistance	na	cLEC-24-C3 and pcc12	11	50620720-50664781	Robbins et al. 2009 and Pei et al. 2012
I2	Disease resistance	AF118127	na	11	51993677	Simons et al. 1998
FAS	Fruit shape and size	EU557673	na	11	52248710	Cong et al. 2008
j-2	Inflorescence	na	TG618 and CD22	12	6323972-28852123	Budiman et al. 2004
1Position was determined relative to the tomato genome sequences (v SL2.40, http://solgenomics.net/organism/Solanum_lycopersicum/genome).
