# Supplementary material for: High-Density SNP Genotyping of Tomato (Solanum lycopersicum L.) Reveals Patterns of Genetic Variation Due to Breeding
Source: PLoS One. 2012 Sep 20;7(9):e45520. doi: 10.1371/journal.pone.0045520 (PMC3447764; doi:10.1371/journal.pone.0045520)
Supplement: Table S4 — Minor allele frequency of 7,310 SNP markers with physical map positions in the sub-populations and sub-groups of the SolCAP germplasm. (XLSX) [file pone.0045520.s006.xlsx]

## Sheet: Table S4
Table S4. Minor allele frequency of 7,310 SNP markers with physical map positions in the sub-populations and sub-groups of the SolCAP germplasm
			Seven sub-populations							Sub-groups within the Proc and FM sub-populations
SNP marker	Chromosome	Physical Position (Mbp)	Processing (Proc)	Fresh market (FM)	Vintage	Cultivated cherry	Landrace	Wild cherry	S. pimpinellifolium	Proc 1	Proc 2	FM 1	FM 2
solcap_snp_sl_15058	1	0.045434	0.0647482	0.269231	0.622642	0.56	0.9	0.775	1	0.037037	0.0980392	0.25	0.295455
solcap_snp_sl_60635	1	0.047132	0	0	0	0.115385	0	0	0.466667	0	0	0	0
solcap_snp_sl_60604	1	0.192109	0	0.0373832	0	0.192308	0	0	0.714286	0	0	0.0491803	0.0217391
solcap_snp_sl_15056	1	0.259974	0.0714286	0.185185	0.438596	0.185185	0.166667	0.0714286	0	0.0493827	0.0961538	0.15	0.229167
solcap_snp_sl_15055	1	0.29955	0.0714286	0.203704	0.473684	0.222222	0.4	0.1	0.0769231	0.0493827	0.0961538	0.183333	0.229167
solcap_snp_sl_15054	1	0.299696	0.0714286	0.203704	0.473684	0.346154	0.4	0.102564	0.533333	0.0493827	0.0961538	0.183333	0.229167
solcap_snp_sl_15052	1	0.301597	0.0714286	0.220183	0.535714	0.384615	0.5	0.166667	0.6	0.0493827	0.0961538	0.196721	0.25
solcap_snp_sl_15051	1	0.301603	0.0714286	0.220183	0.5	0.37037	0.454545	0.102564	0.533333	0.0493827	0.0961538	0.196721	0.25
solcap_snp_sl_15050	1	0.303076	0.0714286	0.205607	0.491525	0.384615	0.4	0.102564	0.533333	0.0493827	0.0961538	0.183333	0.234043
solcap_snp_sl_15049	1	0.303202	0.0714286	0.220183	0.5	0.37037	0.222222	0.0731707	0.428571	0.0493827	0.0961538	0.196721	0.25
CL004303-0524	1	0.310894	0	0.0377358	0	0.2	0.1	0	0.733333	0	0	0.0491803	0.0222222
solcap_snp_sl_24809	1	0.324852	0.165468	0.590476	0.637931	0.384615	0.3	0.216216	0.0625	0.1625	0.115385	0.677966	0.478261
CL016197-0363_solcap_snp_sl_60559	1	0.336495	0	0.0377358	0	0.0833333	0	0.047619	0.714286	0	0	0.0491803	0.0222222
solcap_snp_sl_60557	1	0.338651	0	0.0377358	0	0.12	0	0.047619	0.714286	0	0	0.0491803	0.0222222
solcap_snp_sl_15046	1	0.348201	0.0992908	0.413462	0.0727273	0.25	0.2	0.131579	0.9375	0.121951	0.0192308	0.525424	0.266667
solcap_snp_sl_15039	1	0.48266	0.0921986	0.444444	0.160714	0.32	0.5	0.583333	1	0.121951	0	0.540984	0.319149
solcap_snp_sl_33745	1	0.534448	0.0214286	0.111111	0.362069	0.56	0.7	0.820513	1	0.0246914	0.0192308	0.0819672	0.148936
solcap_snp_sl_60513	1	0.541692	0.244444	0.361111	0.385965	0.592593	0.8	0.875	1	0.125	0.458333	0.278689	0.468085
solcap_snp_sl_24801	1	0.663658	0.358779	0.373832	0.36	0.6	0.75	0.825	1	0.177215	0.711111	0.266667	0.510638
solcap_snp_sl_24799	1	0.669686	0.373134	0.320755	0.415094	0.4	0.8	0.783784	0.0625	0.1875	0.723404	0.233333	0.434783
solcap_snp_sl_24797	1	0.678452	0.363636	0.373832	0.407407	0.576923	0.8	0.902439	1	0.177215	0.717391	0.266667	0.510638
CL017102-0111	1	0.730154	0.0283688	0.0181818	0.25	0.296296	0.555556	0.384615	0	0.0365854	0.0192308	0	0.0408163
solcap_snp_sl_33737	1	0.8537	0.0283688	0.0545455	0.326923	0.346154	0.363636	0.540541	0	0.0365854	0.0192308	0.0327869	0.0816327
solcap_snp_sl_33736	1	0.859321	0	0.0275229	0.0163934	0	0	0.125	0	0	0	0.0166667	0.0408163
solcap_snp_sl_60446	1	0.876224	0	0	0	0.115385	0	0	0.428571	0	0	0	0
solcap_snp_sl_24794	1	0.906718	0.383459	0.214953	0.385965	0.615385	0.666667	0.902439	1	0.2125	0.717391	0.0833333	0.382979
solcap_snp_sl_60417	1	0.986514	0	0.0555556	0	0.125	0.0833333	0.157895	0.9375	0	0	0.0491803	0.0638298
solcap_snp_sl_20500	1	1.08689	0.0507246	0.00909091	0.1	0.111111	0	0.0232558	0	0.075	0.0196078	0	0.0204082
solcap_snp_sl_20499	1	1.1164	0.416667	0.268519	0.473684	0.68	0.5	0.722222	1	0.265823	0.717391	0.131148	0.446809
solcap_snp_sl_60393	1	1.11887	0	0.0550459	0	0.148148	0.0909091	0.0238095	0.714286	0	0	0.0491803	0.0625
solcap_snp_sl_60360	1	1.33777	0	0.0555556	0	0.12	0.222222	0.05	0.9375	0	0	0.0491803	0.0638298
solcap_snp_sl_60356	1	1.36702	0	0	0	0.0740741	0	0	0.3125	0	0	0	0
solcap_snp_sl_8704	1	1.47086	0.234848	0.28972	0.111111	0.461538	0.571429	0.72973	1	0.15	0.377778	0.186441	0.416667
solcap_snp_sl_33719	1	1.5082	0.0070922	0.0272727	0.125	0.16	0.0909091	0.225	0.0625	0	0	0	0.0612245
solcap_snp_sl_60330	1	1.51138	0.0359712	0.0550459	0	0.0769231	0	0.0789474	0.857143	0.0625	0	0.0491803	0.0625
solcap_snp_sl_60318	1	1.52433	0.0359712	0.0555556	0	0.12	0.0909091	0.135135	0.9375	0.0625	0	0.0491803	0.0638298
solcap_snp_sl_8697	1	1.55072	0.035461	0.165138	0.0333333	0.111111	0.1	0.214286	0	0.0365854	0.0192308	0.114754	0.229167
solcap_snp_sl_33709	1	1.57739	0.164179	0.155963	0.293103	0.423077	0.6	0.676471	0.266667	0.0493827	0.369565	0.131148	0.1875
solcap_snp_sl_60303	1	1.60569	0	0.0555556	0	0.12	0.222222	0.0769231	0.9375	0	0	0.0491803	0.0638298
solcap_snp_sl_60296	1	1.67868	0	0.0555556	0	0.08	0.0833333	0.075	0.857143	0	0	0.0491803	0.0638298
solcap_snp_sl_60276	1	1.80937	0	0.0462963	0	0.115385	0.0833333	0.1	0.785714	0	0	0.0491803	0.0425532
solcap_snp_sl_33701	1	2.06352	0.2	0.32381	0.446429	0.307692	0.285714	0.325	0	0.0886076	0.408163	0.288136	0.369565
solcap_snp_sl_60250	1	2.11711	0.0647482	0	0	0.0740741	0	0.0263158	0.714286	0.0864198	0	0	0
solcap_snp_sl_24789	1	2.13554	0.0970149	0.0454545	0.0677966	0.0416667	0	0.0697674	0	0.0126582	0.25	0.0163934	0.0816327
solcap_snp_sl_60227	1	2.20086	0.057554	0	0	0.04	0	0	0.571429	0.0864198	0	0	0
solcap_snp_sl_8669	1	2.25588	0.183824	0.308411	0.527273	0.384615	0.25	0.25641	0	0.227848	0.12	0.35	0.255319
solcap_snp_sl_8668	1	2.31163	0.183824	0.261682	0.491228	0.384615	0.25	0.225	0	0.227848	0.12	0.305085	0.208333
solcap_snp_sl_8667	1	2.31176	0.189781	0.261682	0.517857	0.384615	0.25	0.225	0	0.2375	0.12	0.305085	0.208333
solcap_snp_sl_24787	1	2.37187	0.183824	0.252336	0.45283	0.384615	0.142857	0.275	0	0.227848	0.12	0.271186	0.229167
solcap_snp_sl_60160	1	2.39503	0.0652174	0	0	0.0740741	0.2	0.05	0.571429	0.1	0	0	0
SL20259_223	1	2.44183	0.484375	0.619048	0.518519	0.416667	0.375	0.289474	0	0.346667	0.702128	0.62069	0.617021
CL009286-0792	1	2.44243	0.515625	0.38835	0.52	0.636364	0.714286	0.605263	0.5	0.653333	0.297872	0.37931	0.4
solcap_snp_sl_24785	1	2.44449	0.484375	0.613208	0.45614	0.363636	0.333333	0.289474	0	0.346667	0.702128	0.616667	0.608696
solcap_snp_sl_8659	1	2.44562	0.51938	0.388889	0.525424	0.583333	0.666667	0.605263	0.5	0.657895	0.297872	0.393443	0.382979
solcap_snp_sl_8658	1	2.44595	0.467213	0.377358	0.5	0.545455	0.625	0.564103	0.5	0.594203	0.297872	0.37931	0.375
solcap_snp_sl_8657	1	2.44638	0.515625	0.384615	0.529412	0.636364	0.714286	0.578947	0.5	0.653333	0.297872	0.372881	0.4
solcap_snp_sl_8656	1	2.44652	0.435115	0.386792	0.534483	0.454545	0.375	0.5	0.0625	0.532468	0.297872	0.389831	0.382979
solcap_snp_sl_8655	1	2.44673	0.435115	0.383178	0.534483	0.434783	0.285714	0.5	0.0625	0.532468	0.297872	0.389831	0.375
solcap_snp_sl_8654	1	2.45808	0.484375	0.632075	0.464286	0.391304	0.428571	0.342105	0	0.346667	0.702128	0.616667	0.652174
solcap_snp_sl_8653	1	2.46163	0.51938	0.373832	0.54386	0.608696	0.625	0.621622	0.428571	0.657895	0.297872	0.383333	0.361702
solcap_snp_sl_8651	1	2.46325	0.431818	0.367925	0.490909	0.5	0.571429	0.526316	0.133333	0.532468	0.291667	0.389831	0.340426
SGN-U573329_snp393	1	2.47612	0.0652174	0	0	0.0769231	0.2	0.125	0.285714	0.1	0	0	0
solcap_snp_sl_60143	1	2.50774	0.0652174	0	0	0.115385	0.2	0.15	0.9375	0.1	0	0	0
solcap_snp_sl_8640	1	2.55437	0.035461	0.0186916	0.509091	0.25	0.111111	0.325	0.0625	0.0243902	0.0384615	0	0.0434783
solcap_snp_sl_60135	1	2.57281	0.0729927	0	0	0.0740741	0	0	0.733333	0.101266	0.0192308	0	0
solcap_snp_sl_15014	1	2.57489	0.109489	0.0280374	0.48	0.333333	0	0.486486	0.933333	0.126582	0.0576923	0	0.0652174
solcap_snp_sl_8639	1	2.58171	0.035461	0.0188679	0.480769	0.291667	0	0.365854	0.0625	0.0243902	0.0384615	0	0.0444444
solcap_snp_sl_15013	1	2.73078	0.195652	0.179245	0.118644	0.125	0.222222	0	0	0.209877	0.176471	0.241379	0.104167
solcap_snp_sl_60113	1	2.75137	0	0	0	0.0384615	0	0	0.266667	0	0	0	0
solcap_snp_sl_60089	1	2.87916	0	0.00917431	0	0.0769231	0	0.131579	0.875	0	0	0	0.0208333
solcap_snp_sl_60078	1	2.9556	0.189394	0.0917431	0.20339	0.32	0	0.238095	0	0.0909091	0.326531	0.0655738	0.125
solcap_snp_sl_33686	1	3.00327	0	0	0.0327869	0.0740741	0	0.0232558	0	0	0	0	0
solcap_snp_sl_60043	1	3.10194	0	0	0	0	0	0.0487805	0.866667	0	0	0	0
solcap_snp_sl_60029	1	3.17321	0	0	0	0	0	0.0243902	0.125	0	0	0	0
solcap_snp_sl_60008	1	3.25523	0	0	0	0.0769231	0	0.025641	0.8125	0	0	0	0
solcap_snp_sl_59975	1	3.48608	0	0	0	0.08	0	0.105263	0.666667	0	0	0	0
solcap_snp_sl_59964	1	3.59131	0	0	0	0.0384615	0	0.0512821	0.9375	0	0	0	0
solcap_snp_sl_20440	1	3.69448	0.233577	0.247619	0.0689655	0.04	0	0.0232558	0	0.225	0.176471	0.366667	0.0888889
solcap_snp_sl_59944	1	3.69575	0	0.00925926	0	0	0	0.075	0.933333	0	0	0	0.0212766
solcap_snp_sl_59923	1	3.84268	0	0	0	0	0	0	0.25	0	0	0	0
solcap_snp_sl_20438	1	3.89974	0.0070922	0.0550459	0.15	0.333333	0.545455	0.470588	1	0	0	0.0491803	0.0625
solcap_snp_sl_59913	1	4.15642	0	0.00909091	0	0	0	0.0243902	0.466667	0	0	0	0.0204082
solcap_snp_sl_59897	1	4.40478	0	0	0	0	0	0.0243902	0.357143	0	0	0	0
solcap_snp_sl_59890	1	4.59795	0	0	0	0.04	0	0	0.857143	0	0	0	0
CL015771-0679	1	4.61254	0	0	0	0	0	0	0	0	0	0	0
solcap_snp_sl_59885	1	4.66944	0	0	0	0	0	0	0.333333	0	0	0	0
solcap_snp_sl_33677	1	4.87134	0	0.00925926	0.0545455	0.25	0	0.564103	1	0	0	0	0.0212766
solcap_snp_sl_33676	1	4.94068	0.185185	0.111111	0.442308	0.590909	0.1	0.846154	1	0.151899	0.244898	0.0163934	0.234043
solcap_snp_sl_59869	1	4.9487	0	0	0	0	0	0	0.666667	0	0	0	0
solcap_snp_sl_59817	1	5.08745	0	0	0.0491803	0.0384615	0	0.0555556	0.9375	0	0	0	0
solcap_snp_sl_59806	1	5.34003	0	0	0	0.0384615	0.0833333	0.0263158	0.8	0	0	0	0
solcap_snp_sl_20426	1	5.34699	0.0141844	0.190909	0.472727	0.791667	0.4	0.952381	1	0.0121951	0	0.0655738	0.346939
solcap_snp_sl_59801	1	5.36466	0	0	0	0.0416667	0	0.025	0.933333	0	0	0	0
solcap_snp_sl_59784	1	5.72652	0	0	0	0.04	0	0.0540541	0.733333	0	0	0	0
solcap_snp_sl_59778	1	5.82325	0	0	0	0	0	0	0.5	0	0	0	0
solcap_snp_sl_59771	1	6.22966	0.183824	0.266055	0.407407	0.173913	0	0.0769231	0	0.0625	0.346939	0.163934	0.395833
solcap_snp_sl_59768	1	6.30686	0	0	0	0	0	0	0.230769	0	0	0	0
solcap_snp_sl_59756	1	6.35741	0	0	0	0	0	0	0.333333	0	0	0	0
solcap_snp_sl_59754	1	6.84063	0	0	0	0.04	0.1	0.102564	0.9375	0	0	0	0
solcap_snp_sl_20420	1	6.84379	0	0.0909091	0.320755	0.73913	0.25	0.897436	1	0	0	0	0.204082
solcap_snp_sl_59748	1	7.57671	0	0	0	0.04	0.0909091	0.114286	1	0	0	0	0
solcap_snp_sl_59745	1	7.61709	0	0	0	0	0	0.025	0.8125	0	0	0	0
solcap_snp_sl_33669	1	8.68543	0	0	0	0.192308	0	0.292683	0.0625	0	0	0	0
solcap_snp_sl_41307	1	11.7593	0	0	0	0	0	0	0.0625	0	0	0	0
solcap_snp_sl_41302	1	11.9279	0	0	0	0.04	0.1	0.102564	0.9375	0	0	0	0
solcap_snp_sl_27082	1	15.5869	0	0	0	0.192308	0	0.292683	0.0625	0	0	0	0
solcap_snp_sl_41286	1	16.8103	0	0	0	0	0	0.025	0.8	0	0	0	0
solcap_snp_sl_16925	1	18.5193	0	0.0825688	0.313725	0.28	0	0.230769	0	0	0	0	0.1875
solcap_snp_sl_41282	1	18.5233	0	0	0	0	0	0.025	0.8	0	0	0	0
solcap_snp_sl_51462	1	19.49	0	0	0	0.12	0.181818	0.135135	0.9375	0	0	0	0
solcap_snp_sl_51466	1	26.8519	0	0	0	0	0	0.0769231	0.866667	0	0	0	0
solcap_snp_sl_51469	1	26.8523	0	0	0	0	0	0.0769231	0.866667	0	0	0	0
solcap_snp_sl_30350	1	26.8525	0	0	0	0	0	0	0	0	0	0	0
solcap_snp_sl_51474	1	27.9847	0	0	0	0	0	0	0.0625	0	0	0	0
solcap_snp_sl_66077	1	32.8507	0	0	0	0	0	0.0769231	0.866667	0	0	0	0
solcap_snp_sl_51990	1	33.6838	0	0	0	0	0	0.0769231	0.866667	0	0	0	0
solcap_snp_sl_51992	1	33.9064	0	0	0	0	0	0.0769231	0.866667	0	0	0	0
solcap_snp_sl_56061	1	35.6496	0	0	0	0	0	0.0769231	0.866667	0	0	0	0
solcap_snp_sl_52623	1	37.5484	0	0	0	0	0	0.0769231	0.866667	0	0	0	0
solcap_snp_sl_19066	1	38.1185	0	0.0909091	0.307692	0.73913	0.25	0.897436	1	0	0	0	0.204082
solcap_snp_sl_52631	1	38.1188	0	0	0	0	0	0	0.0666667	0	0	0	0
solcap_snp_sl_14042	1	38.2749	0.182482	0.372727	0.741379	0.888889	0.5	0.976744	1	0.0625	0.34	0.163934	0.632653
solcap_snp_sl_19068	1	38.2763	0	0.0825688	0.288462	0.28	0	0.230769	0	0	0	0	0.1875
solcap_snp_sl_52641	1	38.3216	0	0	0	0.12	0.181818	0.135135	0.9375	0	0	0	0
solcap_snp_sl_52646	1	39.1418	0	0	0	0	0	0.0769231	0.866667	0	0	0	0
solcap_snp_sl_41433	1	40.683	0	0	0	0	0	0.0769231	0.866667	0	0	0	0
solcap_snp_sl_41438	1	40.9099	0	0	0	0	0	0.0769231	0.866667	0	0	0	0
CL009029-0054	1	41.8695	0	0	0	0	0	0	0	0	0	0	0
SL10106_923	1	41.8699	0	0.00909091	0	0	0	0.0769231	0.875	0	0	0	0.0204082
solcap_snp_sl_41445	1	42.5287	0	0	0	0	0	0.0526316	0.866667	0	0	0	0
solcap_snp_sl_39021	1	46.1956	0	0	0	0.04	0	0.0769231	0.875	0	0	0	0
hp2_exon2_11_b	1	46.4981	0	0	0	0.0769231	0	0.0232558	0	0	0	0	0
solcap_snp_sl_16520	1	46.5438	0	0.0825688	0.316667	0.269231	0.166667	0.230769	0	0	0	0	0.1875
solcap_snp_sl_16519	1	46.5439	0	0.0909091	0.280702	0.708333	0.222222	0.871795	1	0	0	0	0.204082
solcap_snp_sl_39018	1	46.552	0	0	0	0.136364	0.181818	0.135135	0.933333	0	0	0	0
solcap_snp_sl_70304	1	47.929	0	0	0	0	0	0.0769231	0.866667	0	0	0	0
solcap_snp_sl_70307	1	48.8349	0	0	0	0	0	0.025	0.8	0	0	0	0
solcap_snp_sl_70309	1	49.1923	0	0	0	0	0	0.0769231	0.866667	0	0	0	0
solcap_snp_sl_70310	1	49.4497	0	0	0	0	0	0.0769231	0.866667	0	0	0	0
solcap_snp_sl_70311	1	49.8888	0	0	0	0	0	0.0769231	0.866667	0	0	0	0
solcap_snp_sl_70312	1	50.7656	0	0	0	0.04	0	0.0769231	0.875	0	0	0	0
solcap_snp_sl_70320	1	51.2707	0	0	0	0	0	0.0769231	0.866667	0	0	0	0
solcap_snp_sl_22423	1	52.3367	0	0.0825688	0.316667	0.269231	0.0909091	0.236842	0	0	0	0	0.1875
solcap_snp_sl_70323	1	52.3367	0	0	0	0	0	0.0526316	0.866667	0	0	0	0
solcap_snp_sl_70327	1	52.7316	0	0	0	0	0	0.0769231	0.866667	0	0	0	0
solcap_snp_sl_70332	1	54.5088	0	0	0	0	0	0	0.6	0	0	0	0
solcap_snp_sl_70336	1	55.5764	0	0	0	0	0	0	0.363636	0	0	0	0
solcap_snp_sl_70337	1	56.5225	0	0	0	0	0	0.0769231	0.866667	0	0	0	0
solcap_snp_sl_70344	1	57.0662	0	0	0	0.12	0.181818	0.135135	0.9375	0	0	0	0
solcap_snp_sl_70345	1	57.2229	0	0	0	0.04	0.1	0.102564	0.9375	0	0	0	0
solcap_snp_sl_70347	1	57.8546	0.176471	0.190909	0.169492	0.125	0	0	0	0.0625	0.346939	0.131148	0.265306
solcap_snp_sl_70348	1	58.3421	0	0	0	0	0	0.0789474	0.933333	0	0	0	0
solcap_snp_sl_70358	1	58.7877	0	0	0	0	0	0	0.0625	0	0	0	0
solcap_snp_sl_37014	1	59.2558	0	0	0	0.192308	0	0.268293	0.0625	0	0	0	0
solcap_snp_sl_70365	1	59.3842	0	0	0	0	0	0.0769231	0.866667	0	0	0	0
solcap_snp_sl_70368	1	60.3649	0	0	0	0	0	0.0238095	0.4	0	0	0	0
solcap_snp_sl_70371	1	60.822	0	0	0	0	0	0.0769231	0.866667	0	0	0	0
solcap_snp_sl_70374	1	60.8485	0	0	0	0	0	0	0.0625	0	0	0	0
solcap_snp_sl_38790	1	61.4784	0	0	0	0	0	0.0769231	0.866667	0	0	0	0
solcap_snp_sl_38789	1	61.7249	0	0	0	0	0	0	0.0625	0	0	0	0
solcap_snp_sl_16466	1	61.7253	0	0.0825688	0.290909	0.28	0	0.230769	0	0	0	0	0.1875
solcap_snp_sl_38787	1	61.7332	0	0	0	0	0	0.0487805	0.428571	0	0	0	0
solcap_snp_sl_38782	1	62.1611	0	0	0	0.0384615	0	0.05	0.333333	0	0	0	0
solcap_snp_sl_26417	1	62.269	0	0.0917431	0.322034	0.73913	0.333333	0.897436	1	0	0	0	0.204082
solcap_snp_sl_38773	1	62.3576	0	0	0	0	0	0.0243902	0.642857	0	0	0	0
solcap_snp_sl_38771	1	62.4944	0	0	0	0	0.1	0.102564	0.9375	0	0	0	0
solcap_snp_sl_38764	1	62.8126	0	0	0	0	0	0	0.428571	0	0	0	0
solcap_snp_sl_18641	1	64.6847	0.176471	0.190909	0.240741	0.125	0.1	0.1	0	0.0625	0.346939	0.131148	0.265306
CL015959-0346	1	66.6439	0	0	0	0	0	0	0	0	0	0	0
solcap_snp_sl_18635	1	67.0378	0	0.0917431	0.275862	0.346154	0	0.210526	0	0	0	0.0163934	0.1875
solcap_snp_sl_18634	1	67.3664	0	0.0909091	0.333333	0.296296	0.166667	0.210526	0	0	0	0.0163934	0.183673
solcap_snp_sl_50596	1	67.4099	0	0	0	0	0	0.0512821	0.533333	0	0	0	0
solcap_snp_sl_50589	1	67.4841	0	0	0	0.0384615	0.111111	0.138889	0.9375	0	0	0	0
solcap_snp_sl_18627	1	67.5123	0	0.0925926	0.396226	0.307692	0.181818	0.210526	0	0	0	0.0163934	0.191489
solcap_snp_sl_50576	1	67.7401	0	0	0	0	0	0.075	0.571429	0	0	0	0
solcap_snp_sl_30142	1	67.7407	0	0	0	0.0769231	0	0.214286	0	0	0	0	0
solcap_snp_sl_50571	1	67.801	0	0	0	0	0	0	0.25	0	0	0	0
solcap_snp_sl_13762	1	67.8555	0.25	0.472222	0.309091	0.5	0.2	0.794872	1	0.151899	0.34	0.491803	0.446809
solcap_snp_sl_50561	1	68.1051	0	0	0	0	0	0	0.466667	0	0	0	0
solcap_snp_sl_18619	1	68.2329	0.169118	0.4	0.8	0.92	0.5	0.976744	1	0.0625	0.326531	0.114754	0.755102
solcap_snp_sl_50542	1	68.27	0	0	0	0.0384615	0	0.05	0.875	0	0	0	0
solcap_snp_sl_50534	1	68.6734	0	0	0	0	0	0	0.2	0	0	0	0
solcap_snp_sl_30135	1	68.7479	0	0.0183486	0.0847458	0.44	0.272727	0.675	1	0	0	0	0.0416667
CL016155-0185	1	68.7728	0	0	0	0	0	0	0	0	0	0	0
solcap_snp_sl_30133	1	68.773	0	0	0	0.0769231	0	0.184211	0	0	0	0	0
solcap_snp_sl_50504	1	68.9042	0	0	0	0	0	0	0.285714	0	0	0	0
solcap_snp_sl_50495	1	68.9443	0	0	0	0	0	0.0789474	0.866667	0	0	0	0
CL015442-1034	1	69.0464	0	0	0	0	0	0	0	0	0	0	0
solcap_snp_sl_50477	1	69.0778	0	0.00909091	0	0.04	0	0.128205	0.9375	0	0	0	0.0204082
solcap_snp_sl_50470	1	69.1688	0	0	0	0	0	0	0.375	0	0	0	0
solcap_snp_sl_50467	1	69.2317	0	0.00909091	0	0.115385	0.272727	0.179487	0.785714	0	0	0	0.0204082
solcap_snp_sl_50464	1	69.3339	0	0.00909091	0	0.04	0	0.157895	0.875	0	0	0	0.0204082
solcap_snp_sl_30125	1	69.4569	0	0	0	0	0	0.139535	0	0	0	0	0
solcap_snp_sl_50458	1	69.46	0	0.00909091	0	0	0	0.131579	0.8	0	0	0	0.0204082
solcap_snp_sl_30116	1	69.658	0.0928571	0.0833333	0.137931	0.12	0	0.325581	0	0.0493827	0.153846	0.0327869	0.148936
solcap_snp_sl_4963	1	69.685	0.0780142	0.154545	0.0333333	0	0.0909091	0	0	0.0853659	0	0.213115	0.0816327
solcap_snp_sl_50427	1	69.75	0	0.00909091	0	0.04	0.111111	0.128205	0.875	0	0	0	0.0204082
solcap_snp_sl_30114	1	69.7508	0.0928571	0.1	0.152542	0	0	0.317073	0	0.0493827	0.153846	0.0327869	0.183673
solcap_snp_sl_30111	1	70.0923	0	0.0181818	0	0.291667	0.2	0.432432	1	0	0	0	0.0408163
SL20127_1427	1	70.1044	0	0.00909091	0	0	0	0.025641	0.642857	0	0	0	0.0204082
solcap_snp_sl_50373	1	70.2213	0	0	0	0.04	0	0.0243902	0.642857	0	0	0	0
2325_3_327_b_2325_3_314	1	70.2627	0.15	0.00909091	0.0163934	0.037037	0	0	0.25	0.182927	0.0384615	0	0.0204082
2325_3_363_b_2325_3_350_solcap_snp_sl_70013	1	70.2627	0	0	0	0	0	0	0	0	0	0	0
solcap_snp_sl_36902	1	70.3644	0.195652	0.0272727	0.0163934	0.0416667	0	0.205128	0.9375	0.2	0.134615	0	0.0612245
solcap_snp_sl_70031	1	70.4277	0.195652	0.0272727	0.0163934	0.12	0	0.162162	0.933333	0.2	0.134615	0	0.0612245
Le005879_466	1	70.5173	0.208633	0.0272727	0.0163934	0.0833333	0.0909091	0.184211	0.933333	0.222222	0.134615	0	0.0612245
SL10483_141	1	70.5207	0.202899	0.0272727	0.0163934	0.16	0.0909091	0.205128	0.9375	0.2125	0.134615	0	0.0612245
solcap_snp_sl_36963	1	70.5798	0.210145	0.0272727	0.0163934	0.153846	0	0.195122	0.625	0.225	0.134615	0	0.0612245
solcap_snp_sl_37999	1	70.6813	0	0	0	0	0	0	0.538462	0	0	0	0
solcap_snp_sl_25912	1	70.8663	0	0	0	0.0384615	0	0.255814	0	0	0	0	0
solcap_snp_sl_25914	1	70.8684	0	0.00909091	0	0.08	0	0.435897	0.933333	0	0	0	0.0204082
solcap_snp_sl_22691	1	70.9536	0.255474	0	0	0	0	0	0	0.225	0.34	0	0
solcap_snp_sl_25918	1	70.9971	0	0	0	0	0	0.166667	0	0	0	0	0
solcap_snp_sl_38059	1	71.0113	0	0.00909091	0	0.0769231	0	0.0769231	0.866667	0	0	0	0.0204082
solcap_snp_sl_38078	1	71.0878	0	0.00909091	0	0.08	0	0.105263	0.9375	0	0	0	0.0204082
solcap_snp_sl_456	1	71.0906	0.224638	0.614679	0.5	0.64	0.714286	0.25	0	0.278481	0.0576923	0.766667	0.428571
solcap_snp_sl_457	1	71.1866	0.233577	0.669725	0.775862	0.583333	0.5	0.65	0.0625	0.291139	0.0588235	0.816667	0.489796
solcap_snp_sl_38096	1	71.216	0	0	0	0.04	0.1	0.121951	0.266667	0	0	0	0
solcap_snp_sl_25922	1	71.4237	0	0.00909091	0.0163934	0.333333	0.4	0.707317	1	0	0	0	0.0204082
solcap_snp_sl_38116	1	71.4335	0	0	0.0163934	0.230769	0	0.236842	0.266667	0	0	0	0
solcap_snp_sl_38119	1	71.4374	0	0	0	0	0	0	0.1875	0	0	0	0
solcap_snp_sl_38123	1	71.4768	0.231884	0.679245	0.517241	0.44	0.2	0.475	0	0.278481	0.0769231	0.862069	0.458333
solcap_snp_sl_38126	1	71.4783	0	0.00909091	0	0.0384615	0.1	0.0769231	0.9375	0	0	0	0.0204082
solcap_snp_sl_469	1	71.5151	0.231884	0.698113	0.482143	0.68	0.5	0.512195	1	0.278481	0.0769231	0.864407	0.489362
solcap_snp_sl_25926	1	71.6423	0	0.00909091	0	0.08	0.181818	0.435897	1	0	0	0	0.0204082
solcap_snp_sl_25929	1	71.7344	0	0.0363636	0.206897	0.0833333	0.4	0.341463	0.0625	0	0	0.0163934	0.0612245
solcap_snp_sl_25930	1	71.7556	0	0.0277778	0.206897	0.0434783	0.333333	0.4	0.0625	0	0	0	0.0625
solcap_snp_sl_25931	1	71.7562	0	0.037037	0.206897	0.08	0.333333	0.564103	1	0	0	0	0.0833333
solcap_snp_sl_25934	1	71.8401	0	0.00909091	0.118644	0.0769231	0.5	0.35	0.0625	0	0	0	0.0204082
solcap_snp_sl_25935	1	71.9055	0	0	0	0	0	0.0232558	0	0	0	0	0
solcap_snp_sl_38178	1	71.946	0	0.00909091	0	0.0384615	0	0.205128	0.933333	0	0	0	0.0204082
solcap_snp_sl_38210	1	72.0711	0	0	0	0	0	0.0238095	0.692308	0	0	0	0
solcap_snp_sl_38243	1	72.2685	0	0.00909091	0	0	0	0.128205	0.9375	0	0	0	0.0204082
solcap_snp_sl_38290	1	72.5285	0	0	0	0.0384615	0	0.05	0.933333	0	0	0	0
solcap_snp_sl_12348	1	72.5286	0.0928571	0.635514	0.241379	0.458333	0.1	0.435897	0.9375	0.111111	0.0192308	0.833333	0.382979
solcap_snp_sl_12350	1	72.6544	0.0928571	0.626168	0.196429	0.44	0.272727	0.25641	0.0714286	0.111111	0.0192308	0.833333	0.361702
solcap_snp_sl_12351	1	72.6545	0.0928571	0.635514	0.203704	0.48	0.2	0.435897	0.9375	0.111111	0.0192308	0.833333	0.382979
solcap_snp_sl_12352	1	72.6582	0.0928571	0.626168	0.192982	0.44	0.2	0.25641	0.0714286	0.111111	0.0192308	0.833333	0.361702
solcap_snp_sl_25951	1	72.6583	0	0	0	0	0	0.214286	0	0	0	0	0
solcap_snp_sl_25952	1	72.6586	0	0	0	0	0	0.214286	0	0	0	0	0
solcap_snp_sl_12354	1	72.6958	0.0935252	0.638095	0.2	0.458333	0.2	0.615385	1	0.111111	0.0196078	0.847458	0.369565
solcap_snp_sl_12355	1	72.6961	0.0928571	0.622642	0.185185	0.458333	0.2	0.564103	0.133333	0.111111	0.0192308	0.830508	0.361702
solcap_snp_sl_12356	1	72.6966	0.0928571	0.641509	0.196429	0.5	0.222222	0.804878	1	0.111111	0.0192308	0.833333	0.391304
solcap_snp_sl_12358	1	72.6971	0.0928571	0.644231	0.188679	0.478261	0.111111	0.725	1	0.111111	0.0192308	0.844828	0.391304
solcap_snp_sl_25953	1	72.7054	0	0.0636364	0.169811	0.347826	0.25	0.883721	1	0	0	0	0.142857
solcap_snp_sl_38324	1	72.7516	0	0.00909091	0	0	0	0.075	0.923077	0	0	0	0.0204082
solcap_snp_sl_521	1	72.7898	0.348148	0.752294	0.0333333	0.16	0	0	0	0.265823	0.44898	0.885246	0.583333
solcap_snp_sl_16331	1	72.7968	0.141844	0.0648148	0.368421	0.416667	0.5	0.512195	0.0625	0.170732	0.0769231	0.0327869	0.106383
solcap_snp_sl_12359	1	72.8004	0.135714	0.0740741	0.339286	0.434783	0.5	0.475	0.0714286	0.160494	0.0769231	0.0327869	0.12766
solcap_snp_sl_38346	1	72.9958	0.0935252	0.00909091	0.0163934	0	0	0.0243902	0.666667	0.135802	0.0384615	0	0.0204082
solcap_snp_sl_530	1	72.9963	0.129496	0.137615	0.245614	0.375	0.2	0.731707	1	0.160494	0.0769231	0.0491803	0.25
solcap_snp_sl_531	1	73.0232	0.519084	0.192308	0.666667	0.56	0.777778	0.439024	0.9375	0.708861	0.173913	0.155172	0.23913
solcap_snp_sl_38356	1	73.0535	0.151079	0.0181818	0.0163934	0	0	0.1	0.733333	0.197531	0.0384615	0	0.0408163
solcap_snp_sl_535	1	73.1473	0.469697	0.807692	0.148148	0.24	0.0909091	0.0232558	0	0.291139	0.787234	0.844828	0.76087
solcap_snp_sl_25960	1	73.1479	0	0	0	0	0	0.186047	0.0625	0	0	0	0
CL009288-0542	1	73.2128	0.151079	0.00909091	0.0163934	0.04	0	0.0238095	0.3125	0.197531	0.0384615	0	0.0204082
solcap_snp_sl_38389	1	73.2228	0.151079	0.0181818	0.0163934	0.0416667	0	0.153846	0.933333	0.197531	0.0384615	0	0.0408163
solcap_snp_sl_38390	1	73.2331	0.151079	0.0181818	0.0163934	0.0416667	0	0.175	0.928571	0.197531	0.0384615	0	0.0408163
solcap_snp_sl_38406	1	73.3142	0.0567376	0.00909091	0	0	0	0	0.857143	0.0609756	0	0	0.0204082
solcap_snp_sl_27286	1	73.4618	0.0638298	0.0181818	0	0.0416667	0.181818	0.25	0.9375	0.0731707	0	0	0.0408163
solcap_snp_sl_36715	1	73.5135	0.0762712	0.0183486	0	0.05	0.222222	0.529412	0.9375	0.0882353	0	0	0.0416667
solcap_snp_sl_27345	1	73.6495	0.0567376	0.0454545	0	0	0	0.0731707	0.75	0.0609756	0	0	0.102041
solcap_snp_sl_42191	1	73.8895	0.05	0.00909091	0	0.0833333	0.181818	0.236842	0.9375	0.0609756	0	0	0.0204082
solcap_snp_sl_27382	1	73.8899	0.05	0.00909091	0	0.04	0	0.131579	0.714286	0.0609756	0	0	0.0204082
solcap_snp_sl_27400	1	73.9678	0.05	0.00909091	0	0.0833333	0	0.0731707	0.785714	0.0609756	0	0	0.0204082
solcap_snp_sl_27452	1	74.2092	0.0642857	0.00909091	0	0.0384615	0	0.0512821	0.8	0.0853659	0	0	0.0204082
solcap_snp_sl_27482	1	74.2737	0	0	0	0	0	0.0232558	0	0	0	0	0
solcap_snp_sl_1813	1	74.2824	0.211679	0.0917431	0.122807	0.192308	0.333333	0.634146	1	0.271605	0.1	0.116667	0.0612245
solcap_snp_sl_1814	1	74.2896	0.157143	0.0733945	0	0.0740741	0.3	0.15	0.307692	0.195122	0.117647	0.116667	0.0204082
Le010791_85_solcap_snp_sl_42212	1	74.3098	0.0642857	0.0181818	0	0	0.0909091	0.315789	0.6	0.0853659	0	0	0.0408163
solcap_snp_sl_42213	1	74.3135	0.205882	0.0917431	0	0.0416667	0.181818	0.384615	1	0.2625	0.1	0.116667	0.0612245
solcap_snp_sl_17063	1	74.3147	0.0070922	0.0648148	0.271186	0.230769	0.166667	0.142857	0	0	0.0192308	0.0163934	0.12766
solcap_snp_sl_1815	1	74.315	0.151079	0.0642202	0	0	0	0	0	0.195122	0.1	0.1	0.0204082
solcap_snp_sl_1817	1	74.3184	0.163121	0.0818182	0	0.0384615	0.0833333	0.125	0.0625	0.195122	0.134615	0.131148	0.0204082
solcap_snp_sl_1819	1	74.3299	0.138686	0.0648148	0	0.0384615	0	0.125	0.0625	0.175	0.1	0.101695	0.0204082
solcap_snp_sl_17068	1	74.3591	0.0714286	0.0833333	0.290909	0.28	0.363636	0.45	0.866667	0.0853659	0.0192308	0.0163934	0.170213
solcap_snp_sl_17071	1	74.3605	0.0714286	0.0833333	0.275862	0.28	0.363636	0.475	0.9375	0.0853659	0.0192308	0.0163934	0.170213
solcap_snp_sl_17072	1	74.3608	0.0070922	0.0648148	0.280702	0.269231	0.25	0.219512	0	0	0.0192308	0.0163934	0.12766
solcap_snp_sl_27505	1	74.3615	0.0642857	0.00909091	0	0	0	0.0487805	0.714286	0.0853659	0	0	0.0204082
solcap_snp_sl_1824	1	74.465	0.138686	0.0733945	0	0	0	0	0	0.175	0.1	0.116667	0.0204082
solcap_snp_sl_17073	1	74.4816	#DIV/0!	0.285714	0	0	0.333333	0.769231	1	#DIV/0!	#DIV/0!	0	0.333333
solcap_snp_sl_17075	1	74.4833	0.0070922	0.0934579	0.37037	0.458333	0.6	0.6	1	0	0.0192308	0.0163934	0.195652
solcap_snp_sl_17076	1	74.5155	0.0070922	0.0740741	0.310345	0.269231	0.166667	0.0714286	0	0	0.0192308	0.0163934	0.148936
solcap_snp_sl_17077	1	74.5156	0.0070922	0.0849057	0.320755	0.391304	0.6	0.615385	1	0	0.0192308	0.0163934	0.177778
solcap_snp_sl_17080	1	74.5463	0.0070922	0.0648148	0.241379	0.269231	0	0.0714286	0	0	0.0192308	0.0163934	0.12766
solcap_snp_sl_1827	1	74.6023	0.143885	0.0727273	0	0	0	0	0	0.185185	0.0980392	0.114754	0.0204082
solcap_snp_sl_27556	1	74.6434	0.00714286	0.00909091	0	0.037037	0	0.0243902	0.428571	0	0.0192308	0	0.0204082
solcap_snp_sl_27588	1	74.8454	0.00714286	0.00917431	0	0.115385	0.181818	0.15	0.9375	0	0.0192308	0	0.0208333
solcap_snp_sl_27600	1	74.9984	0	0.00909091	0	0.037037	0.0909091	0.0731707	0.4	0	0	0	0.0204082
solcap_snp_sl_27605	1	75.0525	0	0.00917431	0	0.037037	0.0909091	0.15	0.9375	0	0	0	0.0208333
solcap_snp_sl_27629	1	75.1775	0	0.00917431	0	0.0384615	0.0833333	0.097561	0.866667	0	0	0	0.0208333
solcap_snp_sl_12826	1	75.199	0.0434783	0.448598	0.20339	0.2	0.0833333	0.05	0	0.0253165	0.0769231	0.551724	0.326531
solcap_snp_sl_27636	1	75.2083	0	0	0	0	0	0.0232558	0	0	0	0	0
SGN-U585636_snp200_solcap_snp_sl_26254	1	75.34	0	0.00917431	0	0.115385	0.181818	0.146341	0.9375	0	0	0	0.0208333
solcap_snp_sl_26248	1	75.362	0	0.00917431	0	0.0384615	0	0.0512821	0.785714	0	0	0	0.0208333
solcap_snp_sl_38490	1	75.4504	0	0.00917431	0	0.037037	0	0.075	0.533333	0	0	0	0.0208333
solcap_snp_sl_16393	1	75.5631	0.0141844	0.0555556	0.22807	0.2	0.375	0.609756	1	0.0121951	0.0192308	0.0163934	0.106383
solcap_snp_sl_16389	1	75.5774	0.0141844	0.0555556	0.214286	0.185185	0.375	0.536585	1	0.0121951	0.0192308	0.0163934	0.106383
SL10943_357	1	75.5904	0	0.00917431	0	0.0384615	0	0.075	0.666667	0	0	0	0.0208333
solcap_snp_sl_602	1	75.8217	0.175573	0.186916	0.641509	0.631579	0.428571	1	1	0.186667	0.0816327	0.152542	0.229167
solcap_snp_sl_26192	1	75.8474	0.00719424	0	0	0	0	0.0714286	0.266667	0.0125	0	0	0
solcap_snp_sl_26171	1	75.9716	0.00719424	0	0	0.037037	0	0.0731707	0.533333	0.0125	0	0	0
solcap_snp_sl_34452	1	76.1158	0.00719424	0	0	0	0	0.0731707	0.428571	0.0125	0	0	0
solcap_snp_sl_34461	1	76.1723	0.00719424	0	0	0	0.0909091	0.125	0.933333	0.0125	0	0	0
solcap_snp_sl_34484	1	76.3535	0.00719424	0	0	0	0	0.025641	0.5625	0.0125	0	0	0
solcap_snp_sl_34512	1	76.5286	0.00719424	0	0	0	0	0.075	0.666667	0.0125	0	0	0
solcap_snp_sl_34513	1	76.5287	0.00719424	0	0	0	0	0.1	0.933333	0.0125	0	0	0
solcap_snp_sl_34515	1	76.5289	0.00719424	0	0	0	0	0.075	0.666667	0.0125	0	0	0
solcap_snp_sl_34522	1	76.5639	0.00719424	0	0	0	0	0.0731707	0.571429	0.0125	0	0	0
CL015901-0259	1	76.6001	0	0	0	0	0	0	0	0	0	0	0
solcap_snp_sl_63558	1	76.6004	0.0142857	0	0	0	0	0.075	0.933333	0.0246914	0	0	0
solcap_snp_sl_9751	1	76.669	0.671875	0.8	0.0677966	0.125	0.111111	0.097561	0	0.730769	0.613636	0.933333	0.622222
solcap_snp_sl_34545	1	76.7372	0.0070922	0	0	0	0	0.2	0.9375	0.0121951	0	0	0
solcap_snp_sl_21280	1	76.7837	0.141791	0.87037	0.40678	0.166667	0.1	0.0487805	0	0.144737	0.115385	0.95082	0.765957
CL016392-0070	1	76.7839	0	0	0	0	0	0	0	0	0	0	0
solcap_snp_sl_9752	1	76.8882	0.496124	0.0363636	0.0526316	0.037037	0.1	0.047619	0	0.532468	0.511111	0.0163934	0.0612245
solcap_snp_sl_9755	1	76.8954	0.492308	0.0454545	0.333333	0.307692	0.5	0.473684	0.0625	0.532468	0.5	0.0163934	0.0816327
solcap_snp_sl_9756	1	76.8973	0.496183	0.0454545	0.357143	0.296296	0.545455	0.473684	0.0625	0.532468	0.510638	0.0163934	0.0816327
solcap_snp_sl_9758	1	76.9019	0.5	0.05	0.434783	0.333333	0.636364	0.5	0.0625	0.532468	0.522727	0.0172414	0.0952381
solcap_snp_sl_34568	1	76.9057	0.503876	0.0458716	0.357143	0.333333	0.555556	0.804878	1	0.545455	0.511111	0.0163934	0.0833333
solcap_snp_sl_9759	1	76.9109	0.507692	0.0458716	0.327273	0.296296	0.5	0.6	0.866667	0.545455	0.521739	0.0163934	0.0833333
Cd2_2755_solcap_snp_sl_34581	1	76.9835	0.0070922	0	0	0.0769231	0.0833333	0.289474	0.9375	0.0121951	0	0	0
Cd2_2182_solcap_snp_sl_34582	1	76.9856	0.0070922	0	0	0	0	0.0487805	0.0625	0.0121951	0	0	0
solcap_snp_sl_34596	1	77.0744	0.0070922	0.0277778	0	0	0	0.0952381	0.642857	0.0121951	0	0	0.0638298
solcap_snp_sl_34603	1	77.1107	0.150376	0.814815	0.345455	0.478261	0.333333	0.578947	0.9375	0.213333	0.0384615	0.885246	0.723404
solcap_snp_sl_63583	1	77.1108	0.150376	0.830189	0.362069	0.5	0.4	0.6	0.9375	0.213333	0.0384615	0.9	0.73913
solcap_snp_sl_15339	1	77.1124	0.142857	0.783019	0.362069	0.375	0.222222	0.230769	0	0.2	0.0384615	0.885246	0.644444
solcap_snp_sl_34622	1	77.1865	0.0070922	0.0277778	0	0	0	0.230769	0.875	0.0121951	0	0	0.0638298
solcap_snp_sl_27784	1	77.3516	0.0070922	0.0277778	0	0	0	0.230769	0.9375	0.0121951	0	0	0.0638298
solcap_snp_sl_27832	1	77.6628	0.0070922	0.0275229	0	0	0	0.0731707	0.642857	0.0121951	0	0	0.0625
solcap_snp_sl_27859	1	77.7486	0.0070922	0.0275229	0	0	0.0909091	0.25641	0.933333	0.0121951	0	0	0.0625
solcap_snp_sl_27863	1	77.7586	0.0070922	0	0	0	0	0.0512821	0.4	0.0121951	0	0	0
solcap_snp_sl_2202	1	77.916	0.238806	0.707547	0.118644	0.48	0.333333	0.717949	1	0.350649	0.0588235	0.8	0.586957
solcap_snp_sl_43632	1	77.9355	0.221374	0.679612	0.0535714	0.291667	0	0.315789	0	0.324324	0.0588235	0.75	0.581395
solcap_snp_sl_27904	1	77.9587	0.0070922	0.0366972	0	0	0	0.230769	0.866667	0.0121951	0	0.0163934	0.0625
solcap_snp_sl_27906	1	77.9589	0.0070922	0.0275229	0	0	0	0.05	0.466667	0.0121951	0	0	0.0625
solcap_snp_sl_27908	1	77.9596	0.0070922	0.0366972	0	0	0	0.075	0.8	0.0121951	0	0.0163934	0.0625
SL10945_281	1	78.091	0.0070922	0.0275229	0	0	0.0909091	0.210526	0.866667	0.0121951	0	0	0.0625
solcap_snp_sl_17289	1	78.1041	0	0.00909091	0.0163934	0	0	0	0	0	0	0	0.0204082
solcap_snp_sl_27964	1	78.1773	0.0070922	0.0275229	0	0	0	0.157895	0.6	0.0121951	0	0	0.0625
CL016133-0426	1	78.3011	0	0	0	0	0	0	0	0	0	0	0
solcap_snp_sl_2218	1	78.31	0.1	0.442308	0.311475	0.52	0.444444	0.692308	1	0.111111	0.0384615	0.421053	0.468085
solcap_snp_sl_2219	1	78.3252	0.0928571	0.401961	0.288136	0.416667	0.222222	0.121951	0	0.0987654	0.0384615	0.410714	0.391304
solcap_snp_sl_43655	1	78.3558	0.0070922	0.0275229	0	0.037037	0	0.0731707	0.8	0.0121951	0	0	0.0625
solcap_snp_sl_2226	1	78.3983	0.0928571	0.245283	0.311475	0.416667	0.3	0.170732	0.0625	0.0987654	0.0384615	0.206897	0.291667
solcap_snp_sl_2234	1	78.5251	0.142857	0.330189	0.327869	0.52	0.444444	0.513514	1	0.123457	0.134615	0.254237	0.425532
solcap_snp_sl_28023	1	78.5849	0.0070922	0.0275229	0	0.04	0.0909091	0.210526	0.9375	0.0121951	0	0	0.0625
solcap_snp_sl_28057	1	78.6936	0.0070922	0	0	0.037037	0	0.0714286	0.6	0.0121951	0	0	0
CL016805-0518	1	78.8261	0	0	0	0	0	0	0	0	0	0	0
CL016805-0261	1	78.8264	0.0642857	0	0	0	0.0909091	0.157895	0.285714	0.0987654	0.0192308	0	0
solcap_snp_sl_28099	1	78.8431	0.0652174	0	0	0.0384615	0	0.05	0.727273	0.1	0.0192308	0	0
solcap_snp_sl_28168	1	79.0805	0	0	0	0	0	0.05	0.5625	0	0	0	0
solcap_snp_sl_28173	1	79.095	0	0.0275229	0	0	0	0.179487	0.733333	0	0	0	0.0625
SGN-U585738_snp404_solcap_snp_sl_43712	1	79.1522	0	0.00934579	0	0	0.0909091	0.189189	0.9375	0	0	0	0.0217391
solcap_snp_sl_28225	1	79.3525	0	0.00934579	0	0.08	0.2	0.2	0.9375	0	0	0	0.0217391
solcap_snp_sl_28247	1	79.4639	0	0	0	0	0.0909091	0.157895	0.75	0	0	0	0
CL016510-0445	1	79.4822	0	0.00934579	0	0	0.0909091	0.184211	0.9375	0	0	0	0.0217391
solcap_snp_sl_43786	1	79.7662	0	0.0186916	0	0.04	0.0909091	0.157895	0.666667	0	0	0.0163934	0.0217391
solcap_snp_sl_43796	1	79.8479	0	0.00909091	0	0.16	0	0.0789474	0.933333	0	0	0.0163934	0
solcap_snp_sl_43843	1	80.0004	0	0.00909091	0	0.111111	0	0.025	0.6	0	0	0.0163934	0
SGN-U314898_snp260	1	80.0012	0	0.00909091	0	0.111111	0	0.025641	0.8125	0	0	0.0163934	0
CL000132-1036	1	80.0693	0	0	0	0	0	0	0	0	0	0	0
solcap_snp_sl_43857	1	80.0742	0	0	0	0	0	0.0487805	0.666667	0	0	0	0
solcap_snp_sl_43894	1	80.2767	0	0.00909091	0	0	0	0	0.533333	0	0	0.0163934	0
solcap_snp_sl_43895	1	80.2768	0	0.00909091	0	0	0	0	0.533333	0	0	0.0163934	0
solcap_snp_sl_43900	1	80.2806	0	0.00909091	0	0	0	0	0.375	0	0	0.0163934	0
ZDS_Promoter_SNP1	1	80.2857	0	0	0	0	0	0.0238095	0.1875	0	0	0	0
solcap_snp_sl_43902	1	80.2898	0	0.00909091	0	0	0	0.0243902	0.6	0	0	0.0163934	0
solcap_snp_sl_43935	1	80.3608	0	0.00909091	0	0.111111	0	0	0.0625	0	0	0.0163934	0
solcap_snp_sl_17351	1	80.4803	0.0212766	0.0181818	0.155172	0.346154	0.4	0.567568	0.933333	0	0.0384615	0.0163934	0.0204082
solcap_snp_sl_43979	1	80.548	0	0.00909091	0	0.111111	0	0	0.125	0	0	0.0163934	0
solcap_snp_sl_44009	1	80.7335	0	0.00917431	0	0.0416667	0	0.0789474	0.666667	0	0	0.0163934	0
solcap_snp_sl_44036	1	80.8825	0	0.00909091	0	0.04	0	0	0.333333	0	0	0.0163934	0
solcap_snp_sl_44048	1	80.9615	0	0	0	0.08	0	0.0769231	0.8	0	0	0	0
solcap_snp_sl_23344	1	80.963	0.201493	0	0	0	0	0	0	0.113924	0.375	0	0
SL10259_338	1	81.0008	0	0	0	0	0	0	0.125	0	0	0	0
solcap_snp_sl_44108	1	81.1636	0	0.00909091	0	0	0	0	0.266667	0	0	0.0163934	0
solcap_snp_sl_44147	1	81.2436	0	0.00909091	0	0	0	0.047619	0.666667	0	0	0.0163934	0
solcap_snp_sl_44168	1	81.2974	0	0	0	0	0	0	0.133333	0	0	0	0
solcap_snp_sl_28287	1	81.333	0.0070922	0.00909091	0.0338983	0.0740741	0	0.236842	0.533333	0	0	0.0163934	0
solcap_snp_sl_44190	1	81.427	0	0.00909091	0	0	0	0.128205	0.8	0	0	0.0163934	0
solcap_snp_sl_44213	1	81.5661	0.0141844	0.00917431	0	0.037037	0	0.0487805	0.642857	0.0243902	0	0.0163934	0
CL017666-0495	1	81.6635	0.0141844	0.00917431	0	0.0384615	0	0.105263	0.866667	0.0243902	0	0.0163934	0
solcap_snp_sl_44266	1	81.7019	0.0141844	0.00917431	0	0.04	0	0.105263	0.9375	0.0243902	0	0.0163934	0
solcap_snp_sl_28295	1	81.7121	0	0	0	0	0	0.0232558	0	0	0	0	0
solcap_snp_sl_44305	1	81.8082	0.0141844	0.0181818	0	0.04	0	0.131579	0.9375	0.0243902	0	0.0163934	0.0204082
solcap_snp_sl_2437	1	81.8707	0.303704	0.0550459	0.413793	0.444444	0.454545	0.394737	0	0.2125	0.428571	0.0163934	0.104167
solcap_snp_sl_2438	1	81.8724	0.318519	0.0733945	0.413793	0.5	0.454545	0.564103	0.9375	0.2375	0.428571	0.0327869	0.125
solcap_snp_sl_2440	1	81.8738	0.318519	0.0733945	0.45283	0.52	0.454545	0.564103	0.8	0.2375	0.428571	0.0327869	0.125
solcap_snp_sl_2451	1	81.9866	0.0143885	0.00909091	0.192982	0.25	0.333333	0.368421	0.133333	0	0.0392157	0.0163934	0
solcap_snp_sl_2452	1	81.9885	0.0357143	0.0272727	0.196429	0.375	0.333333	0.538462	1	0.0365854	0.0392157	0.0327869	0.0204082
solcap_snp_sl_2455	1	81.9923	0.0357143	0.0272727	0.189655	0.375	0.333333	0.564103	1	0.0365854	0.0392157	0.0327869	0.0204082
solcap_snp_sl_2457	1	82.001	0.0357143	0.0272727	0.186441	0.375	0.3	0.564103	1	0.0365854	0.0392157	0.0327869	0.0204082
solcap_snp_sl_44370	1	82.0219	0	0	0	0.037037	0	0	0.0666667	0	0	0	0
CL015672-0280	1	82.0759	0.0141844	0	0	0.0384615	0	0.047619	0.4	0.0243902	0	0	0
CL017306-0367_solcap_snp_sl_44383	1	82.1316	0.0141844	0.00917431	0	0.0769231	0	0.05	0.846154	0.0243902	0	0.0163934	0
solcap_snp_sl_44394	1	82.1559	0	0.00909091	0	0.037037	0	0	0.2	0	0	0.0163934	0
CL015829-0286_solcap_snp_sl_44451	1	82.3294	0.0141844	0.00917431	0	0.0769231	0	0.05	0.866667	0.0243902	0	0.0163934	0
solcap_snp_sl_2501	1	82.3396	0.00724638	0.0181818	0.12069	0.148148	0.0909091	0.0697674	0	0	0.02	0.0163934	0.0204082
solcap_snp_sl_44461	1	82.4045	0.0141844	0.0181818	0	0.166667	0.222222	0.589744	1	0.0243902	0	0.0163934	0.0204082
solcap_snp_sl_2504	1	82.4229	0.0357143	0.0272727	0.114754	0.2	0.181818	0.25	0.9375	0.0365854	0.0392157	0.0327869	0.0204082
solcap_snp_sl_2506	1	82.4259	0.0214286	0.00909091	0.114754	0.153846	0	0.0465116	0	0.0121951	0.0392157	0.0163934	0
solcap_snp_sl_2508	1	82.429	0.0357143	0.0272727	0.114754	0.2	0.181818	0.25	0.9375	0.0365854	0.0392157	0.0327869	0.0204082
solcap_snp_sl_2509	1	82.4327	0.0217391	0.0272727	0.0526316	0.166667	0.181818	0.282051	0.9375	0.0246914	0.02	0.0327869	0.0204082
CL016552-0078	1	82.433	0.0141844	0.00917431	0	0.037037	0	0	0.4	0.0243902	0	0.0163934	0
solcap_snp_sl_44465	1	82.4398	0.0217391	0.0272727	0.0535714	0.16	0.181818	0.275	0.9375	0.0246914	0.02	0.0327869	0.0204082
solcap_snp_sl_2510	1	82.4398	0.0357143	0.0272727	0.116667	0.2	0.181818	0.275	0.9375	0.0365854	0.0392157	0.0327869	0.0204082
solcap_snp_sl_2515	1	82.447	0.0214286	0.00917431	0.116667	0.153846	0.181818	0.2	0.266667	0.0121951	0.0392157	0.0163934	0
solcap_snp_sl_44470	1	82.5037	0.0141844	0.00917431	0	0.0384615	0	0.0487805	0.769231	0.0243902	0	0.0163934	0
solcap_snp_sl_2518	1	82.5211	0.0214286	0.00909091	0.114754	0.185185	0	0.0232558	0	0.0121951	0.0392157	0.0163934	0
solcap_snp_sl_2525	1	82.5373	0.0214286	0.00909091	0.114754	0.185185	0	0.0232558	0	0.0121951	0.0392157	0.0163934	0
SGN-U571854_snp167_solcap_snp_sl_44482	1	82.5928	0	0.0181818	0	0.0769231	0.181818	0.170732	0.8125	0	0	0.0163934	0.0204082
solcap_snp_sl_44540	1	82.8054	0	0	0	0	0	0	0.0625	0	0	0	0
solcap_snp_sl_40061	1	83.223	0.0070922	0	0	0	0	0.0540541	0.75	0.0121951	0	0	0
solcap_snp_sl_40076	1	83.278	0.0070922	0	0	0	0	0.0810811	0.9375	0.0121951	0	0	0
solcap_snp_sl_40154	1	83.5174	0.0070922	0	0	0.08	0	0.111111	0.9375	0.0121951	0	0	0
solcap_snp_sl_40177	1	83.6513	0.0070922	0	0	0	0	0.0810811	0.9375	0.0121951	0	0	0
solcap_snp_sl_40199	1	83.8045	0.0070922	0	0	0	0	0.0243902	0.571429	0.0121951	0	0	0
solcap_snp_sl_40219	1	83.914	0.0070922	0	0	0.115385	0	0.0810811	0.933333	0.0121951	0	0	0
CL015751-0365	1	84.0312	0.0070922	0	0	0.115385	0	0.097561	0.733333	0.0121951	0	0	0
solcap_snp_sl_40284	1	84.1906	0.0070922	0	0	0.111111	0	0	0.357143	0.0121951	0	0	0
CL016719-0209_solcap_snp_sl_40301	1	84.2367	0.0070922	0	0.0508475	0.461538	0.444444	0.634146	1	0.0121951	0	0	0
solcap_snp_sl_40303	1	84.239	0.0070922	0	0	0.08	0.125	0.125	0.866667	0.0121951	0	0	0
solcap_snp_sl_40309	1	84.2537	0.0070922	0	0	0.0769231	0	0.0714286	0.416667	0.0121951	0	0	0
SGN-U597311_snp612	1	84.378	0	0	0	0.037037	0.222222	0.195122	0.214286	0	0	0	0
CL016500-0535	1	84.3909	0	0	0	0	0	0	0	0	0	0	0
CL016500-0058	1	84.3914	0	0	0	0.111111	0	0	0	0	0	0	0
solcap_snp_sl_40364	1	84.4054	0.0070922	0	0	0.111111	0	0.0243902	0.533333	0.0121951	0	0	0
SGN-U576068_snp460_solcap_snp_sl_40366	1	84.4058	0.00714286	0.037037	0.385965	0.615385	0.555556	0.928571	1	0.0121951	0	0	0.0851064
solcap_snp_sl_40410	1	84.6969	0.0070922	0	0	0.111111	0	0.0487805	0.5	0.0121951	0	0	0
solcap_snp_sl_40466	1	84.8848	0.0070922	0.00909091	0	0.111111	0	0.0243902	0.666667	0.0121951	0	0.0163934	0
solcap_snp_sl_40488	1	85.061	0.0070922	0.00917431	0	0.125	0	0.282051	0.9375	0.0121951	0	0.0163934	0
solcap_snp_sl_40498	1	85.0976	0.0070922	0.00917431	0	0.12	0	0.153846	0.9375	0.0121951	0	0.0163934	0
solcap_snp_sl_40527	1	85.2339	0.0070922	0.00909091	0	0.115385	0	0.05	0.666667	0.0121951	0	0.0163934	0
solcap_snp_sl_26879	1	85.2362	0.0070922	0.0185185	0.235294	0.16	0.125	0.0465116	0	0	0.0192308	0	0.0425532
solcap_snp_sl_40571	1	85.4629	0.0070922	0.00909091	0	0.153846	0	0.153846	0.692308	0.0121951	0	0.0163934	0
CL015143-0314	1	85.5174	0	0.00909091	0	0.115385	0	0.0232558	0.133333	0	0	0.0163934	0
solcap_snp_sl_40586	1	85.589	0.00714286	0.0471698	0.125	0.192308	0.125	0.513514	0.933333	0.0121951	0	0.0491803	0.0444444
CL016564-0236_solcap_snp_sl_40595	1	85.6599	0.0070922	0.00909091	0	0.111111	0	0.05	0.733333	0.0121951	0	0.0163934	0
CL016564-0245	1	85.6599	0	0	0	0	0	0	0	0	0	0	0
SGN-U565150_snp835	1	85.732	0	0.00943396	0	0	0.1	0.128205	0	0	0	0	0.0222222
solcap_snp_sl_36725	1	85.7446	0.0142857	0.0673077	0.528302	0.681818	0.7	1	1	0.0121951	0.0192308	0.05	0.0909091
CL017342-0410	1	85.7992	0.0070922	0.00909091	0	0.111111	0	0.0487805	0.785714	0.0121951	0	0.0163934	0
CL017342-0589	1	85.7994	0	0	0	0	0	0	0	0	0	0	0
solcap_snp_sl_42259	1	85.9447	0.0070922	0	0	0	0	0.0243902	0.545455	0.0121951	0	0	0
solcap_snp_sl_42255	1	85.9503	0.0070922	0	0	0	0	0	0.416667	0.0121951	0	0	0
solcap_snp_sl_54525	1	86.0203	0	0.00917431	0	0.12	0	0.128205	0.928571	0	0	0.0163934	0
SGN-U574380_snp1064_solcap_snp_sl_54535	1	86.0885	0.0070922	0	0	0	0	0.05	0.538462	0.0121951	0	0	0
3284_1_60_solcap_snp_sl_54547	1	86.1222	0.0955882	0.0952381	0.35	0.615385	0.4	0.860465	1	0.075	0.14	0.0163934	0.204545
SGN-U313641_snp560	1	86.1231	0	0	0	0	0.2	0.0714286	0	0	0	0	0
CL016298-0380	1	86.1591	0	0	0	0	0	0.1	0.0769231	0	0	0	0
solcap_snp_sl_54581	1	86.2251	0.0070922	0.00909091	0	0.111111	0	0	0.25	0.0121951	0	0.0163934	0
solcap_snp_sl_54589	1	86.3111	0.0070922	0.00917431	0	0.115385	0	0.1	0.5	0.0121951	0	0.0163934	0
C2_At1g50020_1125c	1	86.3184	0	0.00909091	0	0.111111	0	0	0.133333	0	0	0.0163934	0
solcap_snp_sl_31775	1	86.3227	0.117647	0.00934579	0.206897	0.0769231	0.181818	0.0714286	0	0.101266	0.16	0	0.0217391
solcap_snp_sl_31777	1	86.3352	0.111111	0.00934579	0.37037	0.25	0.5	0.307692	0	0.101266	0.142857	0	0.0217391
solcap_snp_sl_54622	1	86.4664	0.0070922	0.00917431	0	0.12	0.0909091	0.179487	0.866667	0.0121951	0	0.0163934	0
CL017439-0390	1	86.4833	0	0	0	0	0	0	0	0	0	0	0
solcap_snp_sl_31778	1	86.4834	0.132353	0.0648148	0.416667	0.346154	0.4	0.45	0	0.125	0.163265	0.05	0.0833333
CL017439-0179	1	86.4835	0	0	0	0.037037	0.0909091	0.170732	0.1875	0	0	0	0
solcap_snp_sl_6718	1	86.4843	0.155556	0.0917431	0.431034	0.608696	0.5	0.744186	0.9375	0.1375	0.1875	0.0666667	0.122449
CL015970-0397_solcap_snp_sl_54631	1	86.4867	0.0070922	0.00917431	0	0.153846	0.0909091	0.243902	0.928571	0.0121951	0	0.0163934	0
CL006477-0571	1	86.5365	0	0	0	0	0	0	0	0	0	0	0
solcap_snp_sl_6721	1	86.5728	0.160584	0.0550459	0.271186	0.269231	0.272727	0.261905	0	0.1375	0.2	0.05	0.0612245
solcap_snp_sl_54669	1	86.652	0.0070922	0.00909091	0	0.24	0	0.125	0.75	0.0121951	0	0.0163934	0
solcap_snp_sl_14323	1	86.6757	0.765152	0.46729	0.288136	0.0740741	0.111111	0	0	0.797468	0.729167	0.474576	0.458333
solcap_snp_sl_19481	1	86.711	0.0444444	0.114286	0.416667	0.68	0.666667	0.902439	1	0.025	0.0612245	0.0508475	0.195652
solcap_snp_sl_54685	1	86.7569	0.0070922	0.00909091	0	0.125	0	0.0243902	0.933333	0.0121951	0	0.0163934	0
SGN-U580895_snp1396_solcap_snp_sl_54697	1	86.8131	0.0070922	0.0380952	0.0166667	0.36	0.222222	0.756098	1	0.0121951	0	0.0338983	0.0434783
solcap_snp_sl_54704	1	86.8288	0.0070922	0.00909091	0	0.192308	0	0.0243902	0.75	0.0121951	0	0.0163934	0
CL009130-0498	1	86.8695	0.138686	0.0183486	0	0.148148	0	0.230769	0.8	0.1	0.2	0.0163934	0.0208333
CL009293-0681	1	86.8831	0.138686	0.0183486	0	0.192308	0	0.225	0.8125	0.1	0.2	0.0163934	0.0208333
solcap_snp_sl_54730	1	86.9647	0	0.00909091	0	0.08	0	0.0238095	0.5	0	0	0.0163934	0
solcap_snp_sl_54731	1	86.9654	0	0.00909091	0	0.111111	0	0.0238095	0.571429	0	0	0.0163934	0
solcap_snp_sl_54732	1	86.9793	0	0.00909091	0	0.111111	0	0.0238095	0.357143	0	0	0.0163934	0
CL016668-0365	1	87.0425	0	0.00909091	0	0.115385	0	0.0243902	0.533333	0	0	0.0163934	0
solcap_snp_sl_54758	1	87.0576	0	0.00917431	0	0.2	0	0.205128	0.928571	0	0	0.0163934	0
solcap_snp_sl_54783	1	87.1931	0	0.00909091	0	0.115385	0	0.0232558	0	0	0	0.0163934	0
solcap_snp_sl_54809	1	87.3135	0	0	0	0	0	0	0.0625	0	0	0	0
solcap_snp_sl_54854	1	87.5069	0.00714286	0.00917431	0	0.115385	0	0.0789474	0.785714	0.0123457	0	0.0163934	0
solcap_snp_sl_54883	1	87.5318	0.00714286	0.00917431	0	0.230769	0	0.105263	0.9375	0.0123457	0	0.0163934	0
solcap_snp_sl_48338	1	87.6418	0	0	0	0.0384615	0	0.0487805	0.785714	0	0	0	0
solcap_snp_sl_48336	1	87.643	0	0	0	0.037037	0	0.075	0.428571	0	0	0	0
C2_At2g15890_430_b	1	87.7982	0.00714286	0.0181818	0.0163934	0.192308	0	0.05	0.785714	0.0123457	0	0.0327869	0
solcap_snp_sl_13404	1	87.9779	0.164179	0.700935	0.413793	0.666667	0.444444	0.767442	1	0.220779	0.02	0.816667	0.553191
solcap_snp_sl_29388	1	87.9782	0.165414	0.695238	0.410714	0.692308	0.5	0.767442	1	0.220779	0.0204082	0.813559	0.543478
solcap_snp_sl_48274	1	87.9783	0.162963	0.698113	0.403509	0.68	0.444444	0.767442	1	0.217949	0.02	0.816667	0.543478
solcap_snp_sl_13402	1	87.9795	0.162963	0.682243	0.396552	0.461538	0.5	0.7	0.266667	0.217949	0.02	0.783333	0.553191
solcap_snp_sl_13401	1	87.9876	0.164179	0.675926	0.448276	0.423077	0.6	0.564103	0.125	0.220779	0.02	0.783333	0.541667
solcap_snp_sl_13399	1	88.0118	0.835821	0.301887	0.517241	0.333333	0.333333	0.232558	0	0.779221	0.98	0.186441	0.446809
solcap_snp_sl_13398	1	88.0386	0.835821	0.301887	0.5	0.333333	0.4	0.162791	0	0.779221	0.98	0.186441	0.446809
solcap_snp_sl_48255	1	88.0718	0	0	0	0.0384615	0	0.0487805	0.4	0	0	0	0
solcap_snp_sl_48243	1	88.1091	0	0.00917431	0.0163934	0.192308	0	0.225	0.666667	0	0	0.0163934	0
solcap_snp_sl_48237	1	88.1318	0	0.0181818	0.0163934	0.192308	0	0.025	0.8	0	0	0.0327869	0
solcap_snp_sl_4283	1	88.2533	0.246154	0.820755	0.62	0.434783	0.625	0.378378	0	0.28	0.142857	0.9	0.717391
solcap_snp_sl_48209	1	88.2696	0	0.0183486	0.0163934	0.192308	0	0.0789474	0.8125	0	0	0.0327869	0
solcap_snp_sl_48181	1	88.4018	0	0.00909091	0.0163934	0.192308	0	0.025	0.642857	0	0	0.0163934	0
solcap_snp_sl_48179	1	88.4179	0	0.00917431	0	0.2	0	0.205128	0.9375	0	0	0.0163934	0
SGN-U581692_snp378	1	88.4302	0	0.00917431	0	0.192308	0	0.205128	0.8	0	0	0.0163934	0
solcap_snp_sl_48151	1	88.5612	0	0.00909091	0	0.153846	0	0.05	0.875	0	0	0.0163934	0
solcap_snp_sl_48133	1	88.6505	0	0.00909091	0.0163934	0.185185	0	0.0238095	0.3125	0	0	0.0163934	0
solcap_snp_sl_48121	1	88.6657	0	0.0747664	0.0166667	0.269231	0.272727	0.317073	0.8	0	0	0.0655738	0.0869565
solcap_snp_sl_48117	1	88.7795	0	0.00917431	0	0.16	0	0.166667	0.6	0	0	0.0163934	0
solcap_snp_sl_48115	1	88.7868	0	0.00909091	0.0163934	0.192308	0	0.05	0.615385	0	0	0.0163934	0
CL017046-0184	1	88.8653	0	0.00909091	0	0	0	0	0	0	0	0	0.0204082
CL009031-0566	1	88.8688	0	0	0	0	0	0	0	0	0	0	0
solcap_snp_sl_48097	1	88.8722	0	0.0740741	0.0163934	0.230769	0.416667	0.230769	0.875	0	0	0.0655738	0.0851064
solcap_snp_sl_48077	1	88.934	0	0.00917431	0	0.2	0	0.157895	0.9375	0	0	0	0.0208333
solcap_snp_sl_48043	1	89.1884	0	0.0183486	0.0327869	0.230769	0.333333	0.25	0.9375	0	0	0	0.0416667
solcap_snp_sl_50683	1	89.2	0	0.0183486	0	0.2	0.2	0.205128	0.866667	0	0	0	0.0416667
SGN-U573826_snp1014_solcap_snp_sl_53877	1	89.2226	0	0.0183486	0.0163934	0.222222	0.333333	0.205128	0.8	0	0	0	0.0416667
solcap_snp_sl_53871	1	89.2245	0	0.00917431	0.0166667	0.230769	0.333333	0.205128	0.875	0	0	0	0.0208333
solcap_snp_sl_53870	1	89.2246	0	0.0183486	0	0.208333	0.2	0.230769	0.875	0	0	0	0.0416667
CL015665-0595	1	89.2398	0	0.00909091	0	0	0	0	0	0	0	0	0.0204082
solcap_snp_sl_53864	1	89.2517	0	0.0183486	0.0333333	0.230769	0.333333	0.205128	0.8	0	0	0	0.0416667
solcap_snp_sl_53862	1	89.2541	0	0.0183486	0	0.2	0.2	0.205128	0.875	0	0	0	0.0416667
SGN-U313729_snp305	1	89.2571	0	0.0272727	0.0333333	0.230769	0.333333	0.205128	0.875	0	0	0	0.0612245
CL016082-0560	1	89.2726	0	0.00925926	0.0333333	0.230769	0.333333	0.205128	0.9375	0	0	0	0.0212766
solcap_snp_sl_53846	1	89.2999	0	0.00917431	0	0.0384615	0	0.105263	0.733333	0	0	0	0.0208333
solcap_snp_sl_53812	1	89.407	0	0	0	0.16	0	0.128205	0.8	0	0	0	0
SGN-U581283_snp1102_solcap_snp_sl_53749	1	89.6285	0	0.00917431	0.0169492	0.307692	0.454545	0.210526	0.9375	0	0	0	0.0208333
solcap_snp_sl_53743	1	89.6384	0	0.00917431	0.0169492	0.307692	0.454545	0.210526	0.9375	0	0	0	0.0208333
CL016160-0228	1	89.6542	0	0	0	0	0	0	0	0	0	0	0
SGN-U581138_snp1171_solcap_snp_sl_53721	1	89.7557	0	0.00909091	0.0327869	0.25	0.454545	0.135135	0.909091	0	0	0	0.0204082
CL015806-0417_solcap_snp_sl_53692	1	89.8511	0	0	0.0163934	0.230769	0.1	0.0731707	0.6875	0	0	0	0
solcap_snp_sl_53671	1	89.9303	0	0	0.0163934	0.269231	0.1	0.047619	0.533333	0	0	0	0
solcap_snp_sl_53654	1	89.9813	0	0.00909091	0.0163934	0.222222	0.4	0.125	0.875	0	0	0	0.0204082
solcap_snp_sl_53630	1	90.0907	0	0.00909091	0.0163934	0.230769	0.5	0.15	0.9375	0	0	0	0.0204082
solcap_snp_sl_53612	1	90.1728	0	0	0	0	0	0.0238095	0.333333	0	0	0	0
solcap_snp_sl_56930	2	0.331954	0	0.00909091	0	0	0	0.0243902	0.1875	0	0	0.0163934	0
solcap_snp_sl_7396	2	0.681961	0	0.00909091	0	0	0	0.1	0.0625	0	0	0.0163934	0
solcap_snp_sl_7398	2	1.51176	0	0.0272727	0	0.0434783	0.3	0.3	0.9375	0	0	0.0327869	0.0204082
SL10205_435	2	1.51465	0	0.00909091	0	0	0	0.1	0.1875	0	0	0.0163934	0
CL009078-0683	2	1.57953	0	0	0	0	0	0	0	0	0	0	0
SL10351_878	2	1.57983	0	0.0272727	0	0	0	0.135135	0.875	0	0	0.0327869	0.0204082
solcap_snp_sl_19822	2	1.58015	0	0.0458716	0.0819672	0.0769231	0.0833333	0.047619	0	0	0	0.0163934	0.0833333
solcap_snp_sl_56940	2	2.05411	0	0.0272727	0	0	0.222222	0.3	0.933333	0	0	0.0327869	0.0204082
solcap_snp_sl_7408	2	2.06998	0	0.0272727	0	0	0	0.135135	0.875	0	0	0.0327869	0.0204082
solcap_snp_sl_56941	2	2.07823	0	0	0	0.0434783	0	0.133333	0.9	0	0	0	0
solcap_snp_sl_7409	2	2.0881	0	0.00909091	0	0	0	0.0731707	0	0	0	0.0163934	0
solcap_snp_sl_56942	2	2.08811	0	0.0272727	0	0	0	0.135135	0.875	0	0	0.0327869	0.0204082
solcap_snp_sl_56943	2	2.08818	0	0.0272727	0.0344828	0.166667	0.333333	0.615385	1	0	0	0.0327869	0.0204082
solcap_snp_sl_7410	2	2.30982	0.410448	0.326923	0.464286	0.458333	0.2	0.292683	0	0.21519	0.75	0.344828	0.304348
solcap_snp_sl_44550	2	6.13844	0	0.0272727	0	0.04	0.3	0.194444	0.9375	0	0	0.0327869	0.0204082
solcap_snp_sl_28320	2	6.13964	0	0.0272727	0	0	0.3	0.275	0.9375	0	0	0.0327869	0.0204082
solcap_snp_sl_2559	2	6.28328	0	0.0272727	0.0350877	0.166667	0.333333	0.615385	1	0	0	0.0327869	0.0204082
solcap_snp_sl_17448	2	6.35529	0	0.0458716	0.0677966	0.04	0.0909091	0.0731707	0	0	0	0.0163934	0.0833333
solcap_snp_sl_2561	2	6.51928	0	0.0272727	0	0.0434783	0.222222	0.3	0.9375	0	0	0.0327869	0.0204082
solcap_snp_sl_2562	2	6.56769	0	0.00909091	0	0	0	0.1	0.1875	0	0	0.0163934	0
solcap_snp_sl_2563	2	6.57045	0	0.0272727	0	0.0434783	0.3	0.3	0.9375	0	0	0.0327869	0.0204082
solcap_snp_sl_2564	2	6.5723	0	0.0272727	0	0	0.222222	0.275	0.9375	0	0	0.0327869	0.0204082
solcap_snp_sl_2565	2	6.5801	0	0.0272727	0	0	0.3	0.275	0.9375	0	0	0.0327869	0.0204082
solcap_snp_sl_2566	2	6.58034	0	0.0272727	0	0.0416667	0.3	0.282051	0.9375	0	0	0.0327869	0.0204082
solcap_snp_sl_2570	2	6.5973	0	0.0272727	0	0.0434783	0.3	0.3	0.9375	0	0	0.0327869	0.0204082
solcap_snp_sl_2572	2	6.59988	0	0.0272727	0	0.0434783	0.3	0.275	0.9375	0	0	0.0327869	0.0204082
solcap_snp_sl_2573	2	6.6032	0	0.00909091	0	0	0	0.1	0.1875	0	0	0.0163934	0
solcap_snp_sl_44555	2	6.61013	0	0.0272727	0	0	0.222222	0.275	0.9375	0	0	0.0327869	0.0204082
solcap_snp_sl_2575	2	6.61029	0	0.0272727	0	0	0.3	0.3	0.9375	0	0	0.0327869	0.0204082
solcap_snp_sl_44556	2	6.61163	0	0.00909091	0	0	0	0.0243902	0.1875	0	0	0.0163934	0
solcap_snp_sl_2580	2	6.91221	0	0.0183486	0	0.0434783	0.3	0.25641	0.916667	0	0	0.0166667	0.0204082
solcap_snp_sl_2590	2	6.94174	0	0.0272727	0	0.0416667	0.3	0.275	0.9375	0	0	0.0327869	0.0204082
solcap_snp_sl_2591	2	6.94174	0	0.0272727	0	0	0.3	0.275	0.9375	0	0	0.0327869	0.0204082
solcap_snp_sl_2592	2	7.19728	0	0.00909091	0	0	0	0.097561	0.0625	0	0	0.0163934	0
solcap_snp_sl_28328	2	7.83111	0	0.0183486	0	0	0.222222	0.275	0.928571	0	0	0.0327869	0
solcap_snp_sl_28329	2	7.84758	0	0.0272727	0	0.0434783	0.3	0.3	0.9375	0	0	0.0327869	0.0204082
solcap_snp_sl_28335	2	8.1389	0	0.0272727	0	0	0.222222	0.3	0.9375	0	0	0.0327869	0.0204082
solcap_snp_sl_28337	2	8.85335	0	0.0272727	0	0	0.222222	0.282051	0.9375	0	0	0.0327869	0.0204082
solcap_snp_sl_28338	2	8.85347	0	0.0280374	0.0363636	0.166667	0.333333	0.692308	1	0	0	0.0327869	0.0217391
solcap_snp_sl_44564	2	9.17244	0	0.0181818	0	0	0.3	0.15	0.75	0	0	0.0163934	0.0204082
solcap_snp_sl_2600	2	9.17448	0	0.0272727	0	0.0434783	0.3	0.307692	0.9375	0	0	0.0327869	0.0204082
solcap_snp_sl_2603	2	9.18121	0	0.00909091	0	0	0	0.1	0.0625	0	0	0.0163934	0
solcap_snp_sl_28340	2	9.57634	0	0.0181818	0	0	0.3	0.15	0.75	0	0	0.0163934	0.0204082
solcap_snp_sl_2604	2	9.57767	0	0.00909091	0	0	0	0.102564	0.1875	0	0	0.0163934	0
solcap_snp_sl_28343	2	9.86692	0	0.0272727	0	0.0434783	0.222222	0.307692	0.9375	0	0	0.0327869	0.0204082
solcap_snp_sl_2606	2	10.4227	0	0.00909091	0	0	0	0.097561	0.0625	0	0	0.0163934	0
solcap_snp_sl_2607	2	10.4234	0	0.0272727	0	0.0434783	0.222222	0.275	0.9375	0	0	0.0327869	0.0204082
solcap_snp_sl_6260	2	10.9835	0	0.00909091	0	0	0	0.0731707	0	0	0	0.0163934	0
solcap_snp_sl_6259	2	10.9837	0	0.00909091	0	0	0	0.1	0.1875	0	0	0.0163934	0
solcap_snp_sl_6255	2	11.0418	0.416667	0.281553	0.365385	0.28	0.0909091	0.209302	0	0.217949	0.765957	0.333333	0.217391
solcap_snp_sl_6253	2	11.0432	0	0.00909091	0	0	0	0.1	0.1875	0	0	0.0163934	0
solcap_snp_sl_6249	2	11.083	0	0.0272727	0	0	0.222222	0.275	0.9375	0	0	0.0327869	0.0204082
solcap_snp_sl_6247	2	11.0832	0	0.0272727	0	0.0434783	0.222222	0.275	0.9375	0	0	0.0327869	0.0204082
solcap_snp_sl_31198	2	11.0838	0	0.00909091	0	0	0	0.0243902	0.1875	0	0	0.0163934	0
solcap_snp_sl_31196	2	11.5606	0	0.00909091	0	0	0	0.0243902	0.1875	0	0	0.0163934	0
solcap_snp_sl_6240	2	12.0141	0	0.0272727	0	0.0833333	0.3	0.3	0.9375	0	0	0.0327869	0.0204082
solcap_snp_sl_6239	2	12.0163	0	0.0272727	0	0	0.222222	0.3	0.9375	0	0	0.0327869	0.0204082
solcap_snp_sl_6238	2	12.0924	0	0.00909091	0	0	0	0.1	0.25	0	0	0.0163934	0
solcap_snp_sl_31193	2	12.2782	0	0.0272727	0	0.0434783	0.3	0.3	0.9375	0	0	0.0327869	0.0204082
solcap_snp_sl_31192	2	12.9219	0	0.0181818	0	0	0.222222	0.146341	0.6875	0	0	0.0163934	0.0204082
solcap_snp_sl_31191	2	12.9219	0	0.0272727	0	0.0434783	0.3	0.3	0.9375	0	0	0.0327869	0.0204082
solcap_snp_sl_31190	2	12.922	0	0.0272727	0	0.0434783	0.3	0.3	0.9375	0	0	0.0327869	0.0204082
solcap_snp_sl_31189	2	12.9406	0	0.0272727	0	0	0.222222	0.275	0.9375	0	0	0.0327869	0.0204082
solcap_snp_sl_6233	2	13.0108	0	0.00909091	0	0	0	0.0731707	0	0	0	0.0163934	0
solcap_snp_sl_53126	2	13.1042	0	0.0272727	0	0.0434783	0.3	0.3	0.9375	0	0	0.0327869	0.0204082
solcap_snp_sl_6229	2	13.1349	0	0.0272727	0	0	0.222222	0.3	0.9375	0	0	0.0327869	0.0204082
solcap_snp_sl_6228	2	13.135	0	0.0272727	0	0.0416667	0.3	0.3	0.9375	0	0	0.0327869	0.0204082
solcap_snp_sl_6227	2	13.135	0	0.0272727	0	0	0.3	0.3	0.9375	0	0	0.0327869	0.0204082
solcap_snp_sl_6226	2	13.2228	0	0.0280374	0.0350877	0.2	0.333333	0.675	1	0	0	0.0327869	0.0217391
solcap_snp_sl_31184	2	13.236	0	0.00909091	0	0	0	0.0243902	0.1875	0	0	0.0163934	0
solcap_snp_sl_6221	2	13.3299	0	0.00909091	0	0	0	0.1	0.1875	0	0	0.0163934	0
solcap_snp_sl_31179	2	13.4224	0	0.0181818	0	0	0	0.025	0.6	0	0	0.0163934	0.0204082
solcap_snp_sl_6206	2	13.4291	0	0.0272727	0	0.0434783	0.4	0.3	0.9375	0	0	0.0327869	0.0204082
solcap_snp_sl_6203	2	13.5828	0	0.00909091	0	0	0	0.0731707	0.0625	0	0	0.0163934	0
solcap_snp_sl_6202	2	13.877	0	0.00909091	0	0	0	0.0731707	0	0	0	0.0163934	0
solcap_snp_sl_6201	2	13.877	0	0.0272727	0	0	0	0.162162	0.866667	0	0	0.0327869	0.0204082
solcap_snp_sl_6199	2	13.8858	0	0.0272727	0	0.0416667	0	0.162162	0.866667	0	0	0.0327869	0.0204082
solcap_snp_sl_6196	2	13.9052	0.413534	0.238095	0.137931	0.230769	0.0909091	0.139535	0	0.21519	0.765957	0.333333	0.125
solcap_snp_sl_6195	2	13.9054	0	0.0272727	0	0	0	0.135135	0.866667	0	0	0.0327869	0.0204082
solcap_snp_sl_6194	2	13.9054	0	0.0272727	0	0.0416667	0	0.162162	0.866667	0	0	0.0327869	0.0204082
solcap_snp_sl_6192	2	13.9084	0	0.0272727	0	0	0.4	0.3	0.9375	0	0	0.0327869	0.0204082
solcap_snp_sl_6190	2	13.95	0	0.00909091	0	0	0	0.0731707	0	0	0	0.0163934	0
solcap_snp_sl_6189	2	13.9501	0	0.0272727	0	0	0	0.162162	0.866667	0	0	0.0327869	0.0204082
solcap_snp_sl_6186	2	14.0135	0	0.00909091	0	0	0	0.0731707	0	0	0	0.0163934	0
solcap_snp_sl_6185	2	14.0166	0	0.0272727	0	0.12	0.4	0.3	0.9375	0	0	0.0327869	0.0204082
solcap_snp_sl_6184	2	14.0173	0	0.0272727	0	0	0	0.135135	0.866667	0	0	0.0327869	0.0204082
solcap_snp_sl_6183	2	14.0417	0	0.0272727	0	0.0416667	0	0.135135	0.866667	0	0	0.0327869	0.0204082
solcap_snp_sl_53120	2	14.0699	0	0.0272727	0	0	0	0.135135	0.866667	0	0	0.0327869	0.0204082
solcap_snp_sl_6180	2	14.294	0	0.0272727	0	0	0	0.135135	0.866667	0	0	0.0327869	0.0204082
solcap_snp_sl_6177	2	14.3326	0	0.0272727	0	0.0416667	0	0.135135	0.875	0	0	0.0327869	0.0204082
solcap_snp_sl_6176	2	14.3326	0	0.0272727	0	0	0	0.135135	0.866667	0	0	0.0327869	0.0204082
solcap_snp_sl_26911	2	14.8408	0	0.00909091	0	0	0	0.0243902	0.1875	0	0	0.0163934	0
solcap_snp_sl_1379	2	14.9811	0	0.0272727	0	0	0	0.131579	0.785714	0	0	0.0327869	0.0204082
solcap_snp_sl_1380	2	14.9833	0	0.0272727	0	0.0434783	0.4	0.275	0.9375	0	0	0.0327869	0.0204082
solcap_snp_sl_40819	2	14.9835	0	0.0272727	0	0.04	0	0.135135	0.866667	0	0	0.0327869	0.0204082
solcap_snp_sl_1381	2	14.9836	0	0.0272727	0	0	0	0.131579	0.8	0	0	0.0327869	0.0204082
solcap_snp_sl_1382	2	14.9837	0	0.0280374	0.0344828	0.166667	0.444444	0.675	1	0	0	0.0327869	0.0217391
solcap_snp_sl_1383	2	14.9845	0	0.0315789	0	0.0416667	0	0.238095	0.866667	0	0	0.0377358	0.0238095
solcap_snp_sl_1384	2	14.9861	0	0.0272727	0	0.0833333	0.333333	0.275	0.9375	0	0	0.0327869	0.0204082
solcap_snp_sl_1385	2	14.9861	0	0.0272727	0	0.04	0.4	0.275	0.9375	0	0	0.0327869	0.0204082
solcap_snp_sl_1386	2	15.1285	0	0.0272727	0	0.0416667	0	0.135135	0.875	0	0	0.0327869	0.0204082
solcap_snp_sl_40820	2	15.1291	0	0.00909091	0	0	0	0.0243902	0.1875	0	0	0.0163934	0
solcap_snp_sl_40823	2	15.1834	0	0.0183486	0	0	0.4	0.205128	0.866667	0	0	0.0166667	0.0204082
solcap_snp_sl_5885	2	15.3848	0	0.0272727	0	0.0833333	0.333333	0.275	0.9375	0	0	0.0327869	0.0204082
solcap_snp_sl_31002	2	15.3849	0	0.0272727	0	0.0434783	0.4	0.275	0.9375	0	0	0.0327869	0.0204082
solcap_snp_sl_52609	2	15.4021	0	0.0272727	0	0.0434783	0.4	0.275	0.9375	0	0	0.0327869	0.0204082
solcap_snp_sl_52608	2	15.4153	0	0.0272727	0	0.0434783	0.4	0.275	0.9375	0	0	0.0327869	0.0204082
solcap_snp_sl_5884	2	15.4223	0	0.0272727	0	0	0.333333	0.275	0.9375	0	0	0.0327869	0.0204082
solcap_snp_sl_5883	2	15.4235	0	0.0272727	0	0.0434783	0.333333	0.275	0.9375	0	0	0.0327869	0.0204082
solcap_snp_sl_5882	2	15.4968	0	0.0272727	0	0	0.333333	0.275	0.9375	0	0	0.0327869	0.0204082
solcap_snp_sl_5881	2	15.4969	0	0.0272727	0	0.0434783	0.4	0.275	0.9375	0	0	0.0327869	0.0204082
solcap_snp_sl_5879	2	15.504	0	0.0272727	0	0.0833333	0.4	0.275	0.9375	0	0	0.0327869	0.0204082
solcap_snp_sl_5875	2	15.5725	0	0.0272727	0	0.0434783	0.333333	0.275	0.9375	0	0	0.0327869	0.0204082
solcap_snp_sl_5872	2	15.631	0	0.0272727	0	0.0434783	0.333333	0.275	0.9375	0	0	0.0327869	0.0204082
solcap_snp_sl_5871	2	15.6311	0	0.0181818	0	0	0.4	0.225	0.666667	0	0	0.0163934	0.0204082
solcap_snp_sl_69276	2	15.6983	0	0.00909091	0	0.04	0	0.0243902	0.266667	0	0	0.0163934	0
solcap_snp_sl_11572	2	15.6992	0	0.0272727	0	0.08	0.4	0.275	0.9375	0	0	0.0327869	0.0204082
solcap_snp_sl_69274	2	15.6996	0	0.00909091	0	0.0416667	0	0.0243902	0.266667	0	0	0.0163934	0
solcap_snp_sl_11569	2	15.6998	0	0.0181818	0	0	0.333333	0.225	0.6	0	0	0.0163934	0.0204082
solcap_snp_sl_32184	2	15.7646	0	0.00909091	0	0.0416667	0	0.0243902	0.266667	0	0	0.0163934	0
solcap_snp_sl_32181	2	15.8176	0	0.00909091	0	0	0	0.0243902	0.266667	0	0	0.0163934	0
solcap_snp_sl_7418	2	16.0124	0	0.00909091	0	0	0	0.0731707	0.125	0	0	0.0163934	0
solcap_snp_sl_7416	2	16.1888	0	0.0272727	0	0.08	0.363636	0.275	0.9375	0	0	0.0327869	0.0204082
solcap_snp_sl_56944	2	16.5775	0	0.0272727	0	0.0434783	0.4	0.275	0.933333	0	0	0.0327869	0.0204082
solcap_snp_sl_32178	2	16.5778	0	0.00909091	0	0	0	0.0238095	0.0666667	0	0	0.0163934	0
solcap_snp_sl_7413	2	16.5844	0	0.0272727	0	0.08	0.4	0.275	0.933333	0	0	0.0327869	0.0204082
solcap_snp_sl_5308	2	17.4786	0	0.00909091	0	0	0	0.075	0.1875	0	0	0.0163934	0
Le005962_147	2	17.479	0	0.0272727	0	0	0	0.135135	0.866667	0	0	0.0327869	0.0204082
solcap_snp_sl_30414	2	17.6305	0	0.0272727	0	0	0.4	0.275	0.9375	0	0	0.0327869	0.0204082
solcap_snp_sl_5306	2	17.6305	0	0.0272727	0	0.04	0.4	0.275	0.933333	0	0	0.0327869	0.0204082
solcap_snp_sl_30413	2	17.6323	0	0.0272727	0	0	0.4	0.275	0.9375	0	0	0.0327869	0.0204082
solcap_snp_sl_30412	2	17.6536	0	0.0272727	0	0.0416667	0.333333	0.275	0.9375	0	0	0.0327869	0.0204082
solcap_snp_sl_51537	2	17.7554	0	0.0272727	0	0	0.333333	0.275	0.9375	0	0	0.0327869	0.0204082
solcap_snp_sl_5305	2	17.7558	0	0.0272727	0	0.04	0.4	0.275	0.9375	0	0	0.0327869	0.0204082
solcap_snp_sl_5304	2	17.7561	0	0.0181818	0	0	0.4	0.275	0.666667	0	0	0.0327869	0
solcap_snp_sl_5303	2	17.7563	0	0.0181818	0	0	0.333333	0.275	0.666667	0	0	0.0327869	0
solcap_snp_sl_5301	2	17.7788	0	0.0181818	0	0	0	0.105263	0.5	0	0	0.0327869	0
solcap_snp_sl_5300	2	17.7897	0	0.0272727	0	0.0833333	0.4	0.275	0.9375	0	0	0.0327869	0.0204082
solcap_snp_sl_5299	2	17.7901	0	0.0272727	0	0.0833333	0.4	0.275	0.9375	0	0	0.0327869	0.0204082
solcap_snp_sl_30408	2	17.798	0	0	0	0	0	0	0	0	0	0	0
solcap_snp_sl_5293	2	17.8009	0	0.0272727	0	0.0416667	0.4	0.275	0.9375	0	0	0.0327869	0.0204082
solcap_snp_sl_5285	2	17.9319	0	0.0272727	0	0	0	0.135135	0.533333	0	0	0.0327869	0.0204082
solcap_snp_sl_5284	2	17.9488	0	0.00909091	0	0	0	0.075	0.0625	0	0	0.0163934	0
solcap_snp_sl_5283	2	18.2137	0	0.0272727	0	0.04	0.333333	0.282051	0.9375	0	0	0.0327869	0.0204082
solcap_snp_sl_5280	2	18.3094	0	0.0181818	0	0.037037	0.4	0.175	0.2	0	0	0.0163934	0.0204082
solcap_snp_sl_5277	2	18.7132	0	0.00909091	0	0.037037	0.4	0.175	0.2	0	0	0.0163934	0
solcap_snp_sl_5276	2	18.7144	0	0.0181818	0	0.037037	0.4	0.175	0.2	0	0	0.0163934	0.0204082
solcap_snp_sl_30399	2	18.948	0	0.00909091	0	0	0	0.0263158	0.75	0	0	0.0163934	0
solcap_snp_sl_51535	2	19.1934	0	0.0181818	0	0	0	0.025641	0.75	0	0	0.0163934	0.0204082
solcap_snp_sl_5270	2	19.1954	0	0.00909091	0	0.037037	0.4	0.175	0.2	0	0	0.0163934	0
solcap_snp_sl_5269	2	19.1961	0	0.00909091	0	0.037037	0.4	0.175	0.2	0	0	0.0163934	0
solcap_snp_sl_5268	2	19.2232	0	0.0272727	0	0.08	0.4	0.25	0.875	0	0	0.0327869	0.0204082
solcap_snp_sl_13842	2	20.0692	0.402985	0.235849	0.189655	0.230769	0.0909091	0.0697674	0	0.202532	0.75	0.327586	0.125
solcap_snp_sl_51532	2	20.0692	0	0.0272727	0.0350877	0.16	0.444444	0.6	0.9375	0	0	0.0327869	0.0204082
solcap_snp_sl_51531	2	20.1063	0	0.00909091	0	0	0	0.0238095	0.0666667	0	0	0.0163934	0
solcap_snp_sl_5266	2	20.1362	0.406015	0.285714	0.298246	0.269231	0.0909091	0.162791	0	0.202532	0.765957	0.344828	0.212766
solcap_snp_sl_5263	2	20.1489	0	0.00909091	0	0	0	0.0731707	0	0	0	0.0163934	0
solcap_snp_sl_5262	2	20.17	0	0.00909091	0	0	0	0.075	0.266667	0	0	0.0163934	0
SL10028_121	2	20.1704	0	0.00909091	0	0	0	0.075	0.266667	0	0	0.0163934	0
solcap_snp_sl_5261	2	20.1715	0	0.0272727	0	0	0	0.108108	0.933333	0	0	0.0327869	0.0204082
solcap_snp_sl_5260	2	20.1715	0	0.0272727	0	0.08	0.333333	0.275	0.9375	0	0	0.0327869	0.0204082
solcap_snp_sl_5257	2	20.1762	0	0.00909091	0	0	0	0.075	0.266667	0	0	0.0163934	0
solcap_snp_sl_5256	2	20.1852	0	0.0272727	0	0.0384615	0	0.135135	0.875	0	0	0.0327869	0.0204082
solcap_snp_sl_5251	2	20.2457	0	0.00909091	0	0	0	0.0731707	0	0	0	0.0163934	0
solcap_snp_sl_1393	2	21.1871	0	0.0272727	0	0.08	0.4	0.275	0.9375	0	0	0.0327869	0.0204082
solcap_snp_sl_26935	2	21.1912	0	0.00909091	0	0	0	0.0238095	0.0666667	0	0	0.0163934	0
solcap_snp_sl_1391	2	21.2845	0	0.0272727	0	0.08	0.4	0.275	0.75	0	0	0.0327869	0.0204082
solcap_snp_sl_12647	2	21.2851	0.40146	0.54902	0.37931	0.166667	0.111111	0.0238095	0	0.54321	0.204082	0.576271	0.511628
solcap_snp_sl_1390	2	21.2851	0	0.0272727	0	0.08	0.4	0.275	0.733333	0	0	0.0327869	0.0204082
solcap_snp_sl_1389	2	21.2861	0	0.00909091	0	0	0	0.0731707	0	0	0	0.0163934	0
solcap_snp_sl_1388	2	21.3099	0	0.0272727	0	0.0769231	0.4	0.275	0.733333	0	0	0.0327869	0.0204082
solcap_snp_sl_26928	2	21.3106	0	0.0181818	0	0.04	0	0.0512821	0.75	0	0	0.0163934	0.0204082
solcap_snp_sl_26923	2	21.5135	0	0.0181818	0	0.125	0.333333	0.307692	0.9375	0	0	0.0163934	0.0204082
solcap_snp_sl_30473	2	21.6728	0	0.0181818	0	0.12	0.4	0.282051	0.9375	0	0	0.0163934	0.0204082
solcap_snp_sl_30479	2	21.6895	0	0.00909091	0	0	0	0.0243902	0.6	0	0	0.0163934	0
solcap_snp_sl_30482	2	21.765	0	0.0181818	0	0.0416667	0	0.0512821	0.75	0	0	0.0163934	0.0204082
solcap_snp_sl_56955	2	22.1987	0	0.0181818	0	0	0	0.025	0.571429	0	0	0.0163934	0.0204082
solcap_snp_sl_32196	2	22.1992	0	0.0181818	0	0.0434783	0.333333	0.275	0.9375	0	0	0.0163934	0.0204082
solcap_snp_sl_944	2	24.1674	0	0.0272727	0	0.0434783	0.222222	0.3	0.9375	0	0	0.0327869	0.0204082
solcap_snp_sl_945	2	24.1807	0	0.00909091	0	0	0	0.1	0.1875	0	0	0.0163934	0
solcap_snp_sl_2037	2	24.5392	0	0.0272727	0	0.0416667	0	0.135135	0.875	0	0	0.0327869	0.0204082
solcap_snp_sl_2036	2	24.7945	0	0.00909091	0	0	0	0.097561	0.0625	0	0	0.0163934	0
solcap_snp_sl_2031	2	25.7469	0	0.0272727	0	0	0.3	0.3	0.933333	0	0	0.0327869	0.0204082
solcap_snp_sl_2030	2	25.7471	0	0.0272727	0	0	0	0.135135	0.875	0	0	0.0327869	0.0204082
solcap_snp_sl_2029	2	25.7488	0	0.0272727	0	0.0416667	0.3	0.3	0.933333	0	0	0.0327869	0.0204082
solcap_snp_sl_2028	2	25.7489	0	0.0272727	0	0	0.222222	0.3	0.9375	0	0	0.0327869	0.0204082
solcap_snp_sl_2027	2	25.749	0	0.0272727	0	0	0	0.135135	0.8	0	0	0.0327869	0.0204082
solcap_snp_sl_11798	2	26.0992	0	0.00909091	0	0	0	0.097561	0.0666667	0	0	0.0163934	0
solcap_snp_sl_70009	2	26.9623	0	0.0272727	0	0	0	0.135135	0.875	0	0	0.0327869	0.0204082
solcap_snp_sl_36890	2	26.9623	0	0.0272727	0	0.0416667	0	0.135135	0.875	0	0	0.0327869	0.0204082
solcap_snp_sl_11802	2	26.9628	0	0.00909091	0	0	0	0.097561	0.0625	0	0	0.0163934	0
solcap_snp_sl_11803	2	26.9629	0	0.0272727	0	0	0	0.135135	0.875	0	0	0.0327869	0.0204082
solcap_snp_sl_11804	2	26.9776	0	0.0272727	0	0.0416667	0.3	0.3	0.9375	0	0	0.0327869	0.0204082
solcap_snp_sl_11805	2	26.9822	0	0.0272727	0	0.0833333	0.3	0.3	0.9375	0	0	0.0327869	0.0204082
solcap_snp_sl_70010	2	27.3692	0	0.0181818	0	0	0	0.025641	0.8	0	0	0.0163934	0.0204082
solcap_snp_sl_25966	2	27.9233	0	0.00909091	0	0	0	0.0243902	0.285714	0	0	0.0163934	0
solcap_snp_sl_25974	2	28.1	0	0.0181818	0.0169492	0.0869565	0.4	0.35	0.8	0	0	0.0163934	0.0204082
CL016852-0345	2	28.1637	0	0	0	0.0740741	0.4	0.410256	0.0666667	0	0	0	0
CL016852-0159	2	28.1639	0	0	0	0	0	0	0	0	0	0	0
solcap_snp_sl_25987	2	28.2563	0	0.0181818	0.0163934	0	0	0.047619	0.625	0	0	0.0163934	0.0204082
SGN-U600984_snp332	2	28.3199	0	0.00909091	0	0	0.4	0.153846	0.9375	0	0	0	0.0204082
solcap_snp_sl_26013	2	28.4616	0.0070922	0	0	0	0	0.0238095	0.266667	0	0	0	0
solcap_snp_sl_26022	2	28.5561	0.0070922	0.00909091	0.0169492	0.16	0.4	0.307692	0.9375	0	0	0	0.0204082
Le006654_46	2	28.7988	0.0070922	0.00909091	0.0163934	0.0416667	0	0.05	0.714286	0	0	0	0.0204082
solcap_snp_sl_26050	2	28.9626	0.0070922	0.00909091	0	0	0	0.0238095	0.266667	0	0	0.0163934	0
solcap_snp_sl_26072	2	29.0958	0.109489	0.0277778	0.410714	0.416667	0.5	0.725	1	0.141026	0.0576923	0.0163934	0.0425532
solcap_snp_sl_26094	2	29.4259	0	0	0	0	0	0.0238095	0.0666667	0	0	0	0
solcap_snp_sl_26109	2	29.5048	0	0	0	0.115385	0.3	0.210526	0.666667	0	0	0	0
solcap_snp_sl_26124	2	29.7344	0	0.00909091	0	0	0	0.0232558	0.125	0	0	0.0163934	0
solcap_snp_sl_12372	2	29.7509	0.214815	0.245098	0.719298	0.64	0.888889	0.953488	1	0.139241	0.326531	0.220339	0.27907
solcap_snp_sl_38456	2	29.7927	0.0070922	0.0272727	0	0.0384615	0.222222	0.219512	0.866667	0	0	0.0163934	0.0408163
solcap_snp_sl_26129	2	29.7928	0.0070922	0.0272727	0	0.0384615	0.222222	0.225	0.9375	0	0	0.0163934	0.0408163
solcap_snp_sl_26132	2	29.8476	0.0070922	0.0272727	0	0.037037	0.2	0.238095	0.666667	0	0	0.0163934	0.0408163
solcap_snp_sl_38457	2	29.8477	0.0070922	0.0272727	0	0.0384615	0.222222	0.238095	0.666667	0	0	0.0163934	0.0408163
solcap_snp_sl_26134	2	29.8504	0.0070922	0.0272727	0	0.0384615	0.222222	0.238095	0.6	0	0	0.0163934	0.0408163
solcap_snp_sl_26136	2	29.8519	0.0070922	0.00909091	0	0	0	0.0238095	0.5	0	0	0.0163934	0
solcap_snp_sl_26147	2	29.9425	0	0	0	0	0	0.0238095	0.333333	0	0	0	0
solcap_snp_sl_26158	2	30.0772	0.0070922	0	0	0	0	0.05	0.733333	0	0	0	0
solcap_snp_sl_26168	2	30.2195	0.0070922	0.00909091	0	0	0	0.0487805	0.666667	0	0	0	0.0204082
solcap_snp_sl_36312	2	30.2523	0.0070922	0.00909091	0	0	0.222222	0.097561	0.642857	0	0	0	0.0204082
solcap_snp_sl_22259	2	30.2824	0.0070922	0.130841	0.232143	0.541667	0.6	0.780488	1	0	0	0.12069	0.142857
solcap_snp_sl_67542	2	30.301	0.0070922	0.130841	0.245614	0.541667	0.6	0.780488	1	0	0	0.12069	0.142857
solcap_snp_sl_36484	2	30.3138	0.0070922	0	0	0.04	0	0.170732	0.384615	0	0	0	0
solcap_snp_sl_36448	2	30.6547	0	0.00909091	0	0.0769231	0.2	0.275	0.875	0	0	0	0.0204082
solcap_snp_sl_15709	2	30.6743	0.0070922	0.422018	0.15	0.269231	0	0.512821	0.125	0	0	0.533333	0.285714
solcap_snp_sl_15707	2	30.7071	0.0070922	0.435185	0.133333	0.434783	0.25	0.707317	1	0	0	0.542373	0.306122
solcap_snp_sl_36443	2	30.7457	0.165468	0.466667	0.103448	0.391304	0	0.625	0.933333	0.2	0.0384615	0.596491	0.3125
solcap_snp_sl_15706	2	30.7458	0.165468	0.476636	0.133333	0.391304	0	0.625	0.933333	0.2	0.0384615	0.610169	0.3125
solcap_snp_sl_36441	2	30.8132	0	0	0	0.0384615	0.2	0.0714286	0.2	0	0	0	0
Le009381_51	2	30.826	0	0.00909091	0	0.12	0.2	0.205128	0.8125	0	0	0	0.0204082
solcap_snp_sl_67520	2	30.9664	0	0	0	0	0	0	0.0909091	0	0	0	0
solcap_snp_sl_36420	2	31.0725	0	0.00909091	0	0.12	0.2	0.368421	1	0	0	0	0.0204082
solcap_snp_sl_36419	2	31.1325	0	0	0	0.0769231	0.2	0.0769231	0.285714	0	0	0	0
solcap_snp_sl_36400	2	31.2745	0	0.00909091	0	0.125	0.2	0.230769	0.8	0	0	0	0.0204082
solcap_snp_sl_15701	2	31.3197	0.0142857	0.485981	0.12069	0.208333	0	0.232558	0.0625	0.0121951	0	0.65	0.276596
solcap_snp_sl_15699	2	31.368	0.0070922	0.420561	0.101695	0.291667	0.1	0.435897	0.333333	0	0	0.55	0.255319
solcap_snp_sl_15698	2	31.3681	0.0070922	0.415094	0.101695	0.291667	0.1	0.435897	0.333333	0	0	0.542373	0.255319
solcap_snp_sl_15697	2	31.3685	0.0070922	0.420561	0.101695	0.291667	0.1	0.435897	0.285714	0	0	0.55	0.255319
solcap_snp_sl_15696	2	31.3686	0.0070922	0.420561	0.101695	0.291667	0.1	0.435897	0.285714	0	0	0.55	0.255319
solcap_snp_sl_15693	2	31.3725	0.0070922	0.420561	0.101695	0.291667	0.1	0.435897	0.285714	0	0	0.55	0.255319
solcap_snp_sl_15690	2	31.385	0.0070922	0.409524	0.1	0.2	0	0.190476	0	0	0	0.534483	0.255319
solcap_snp_sl_15689	2	31.3852	0.0283688	0.5	0.372881	0.636364	0.444444	0.634146	0.9375	0.0243902	0.0192308	0.583333	0.391304
solcap_snp_sl_15688	2	31.3852	0.0283688	0.490385	0.339286	0.636364	0.444444	0.634146	0.9375	0.0243902	0.0192308	0.568966	0.391304
CL016047-0333	2	31.3856	0	0	0	0	0	0	0	0	0	0	0
CL016047-0183_solcap_snp_sl_36384	2	31.3858	0	0	0	0.0740741	0	0.0243902	0.0666667	0	0	0	0
solcap_snp_sl_21955	2	31.3871	0.0212766	0.0648148	0.211538	0.391304	0.6	0.475	0.9375	0.0243902	0.0192308	0.0327869	0.106383
SGN-U563909_snp1344_solcap_snp_sl_67508	2	31.4311	0	0.00909091	0	0.16	0.1	0.230769	0.9375	0	0	0	0.0204082
solcap_snp_sl_36373	2	31.4905	0	0.00909091	0	0.16	0.1	0.236842	1	0	0	0	0.0204082
SGN-U571208_snp268	2	31.5014	0	0.00909091	0	0.115385	0	0.0487805	0.733333	0	0	0	0.0204082
CL017839-0338	2	31.5118	0	0	0	0	0	0	0	0	0	0	0
solcap_snp_sl_8384	2	31.5676	0.267176	0.0555556	0.25	0.28	0.222222	0.578947	1	0.27027	0.2	0.0338983	0.0816327
solcap_snp_sl_8386	2	31.7627	0.274809	0.0642202	0.27451	0.2	0.0909091	0.135135	0.9375	0.28	0.204082	0.05	0.0816327
solcap_snp_sl_20322	2	31.7641	0	0.00909091	0.0163934	0	0	0	0	0	0	0	0.0204082
solcap_snp_sl_8388	2	31.7649	0.269231	0.0550459	0.254545	0.192308	0.0909091	0.105263	0.538462	0.27027	0.204082	0.05	0.0612245
solcap_snp_sl_8389	2	31.766	0.267176	0.0642202	0.254545	0.208333	0.0909091	0.135135	0.9375	0.27027	0.2	0.05	0.0816327
solcap_snp_sl_8393	2	31.7672	0.274809	0.0648148	0.27451	0.208333	0.0909091	0.135135	0.9375	0.28	0.204082	0.0508475	0.0816327
solcap_snp_sl_33199	2	31.7676	0	0	0	0.115385	0	0.047619	0.461538	0	0	0	0
solcap_snp_sl_8397	2	31.7689	0.269231	0.0648148	0.27451	0.208333	0.0909091	0.135135	0.9375	0.27027	0.204082	0.0508475	0.0816327
solcap_snp_sl_33205	2	31.7904	0	0	0	0.111111	0	0.0487805	0.4375	0	0	0	0
solcap_snp_sl_20325	2	31.8215	0.282443	0.0642202	0.333333	0.25	0.222222	0.538462	0.9375	0.28	0.204082	0.05	0.0816327
solcap_snp_sl_8402	2	31.8824	0.276923	0.0648148	0.346154	0.166667	0.222222	0.275	0.866667	0.27027	0.204082	0.0508475	0.0816327
Le017925_27_solcap_snp_sl_33223	2	31.8854	0	0.00909091	0	0.16	0.1	0.25	0.875	0	0	0	0.0204082
solcap_snp_sl_8405	2	31.8992	0.274809	0.0648148	0.365385	0.25	0.375	0.425	0.9375	0.266667	0.204082	0.0508475	0.0816327
solcap_snp_sl_8408	2	31.9066	0.272727	0.0642202	0.339286	0.25	0.333333	0.425	0.9375	0.266667	0.2	0.05	0.0816327
solcap_snp_sl_8409	2	31.9206	0.292308	0.0550459	0.37037	0.12	0.0909091	0.282051	0.928571	0.293333	0.208333	0.05	0.0612245
SGN-U578164_snp2086	2	31.9417	0	0.00909091	0	0.24	0.2	0.282051	0.9375	0	0	0	0.0204082
solcap_snp_sl_8421	2	31.9746	0.0285714	0.0272727	0.277778	0.16	0.333333	0.375	0.9375	0.0243902	0	0	0.0612245
solcap_snp_sl_33242	2	31.975	0	0.00909091	0	0.12	0	0.0487805	0.857143	0	0	0	0.0204082
solcap_snp_sl_8423	2	31.9755	0.0285714	0.0272727	0.277778	0.16	0.333333	0.375	0.9375	0.0243902	0	0	0.0612245
solcap_snp_sl_8426	2	31.9778	0.0285714	0.0272727	0.277778	0.16	0.333333	0.375	0.9375	0.0243902	0	0	0.0612245
solcap_snp_sl_20340	2	32.0185	0.235294	0.0555556	0.290909	0.375	0.625	0.589744	0.0625	0.151899	0.4	0.0327869	0.0851064
solcap_snp_sl_20344	2	32.1433	0.237037	0.339623	0.293103	0.5	0.666667	0.307692	0.0625	0.153846	0.4	0.366667	0.304348
solcap_snp_sl_33255	2	32.183	0	0.00909091	0	0.0740741	0	0.075	0.733333	0	0	0	0.0204082
solcap_snp_sl_24721	2	32.2256	0.220588	0.0181818	0.0833333	0.115385	0	0.0238095	0	0.126582	0.4	0.0163934	0.0204082
solcap_snp_sl_14946	2	32.2654	0.302158	0.0275229	0.321429	0.0769231	0.0833333	0.27027	0.666667	0.426829	0.12	0	0.0625
solcap_snp_sl_20358	2	32.2802	0.306569	0.0275229	0.296296	0.153846	0.3	0.475	0.9375	0.439024	0.104167	0	0.0625
solcap_snp_sl_20361	2	32.3118	0.309353	0.0275229	0.303571	0.115385	0.3	0.475	0.9375	0.439024	0.12	0	0.0625
solcap_snp_sl_8439	2	32.3735	0.364286	0.0275229	0.298246	0.153846	0.3	0.375	0.875	0.439024	0.27451	0	0.0625
solcap_snp_sl_8441	2	32.3954	0.359712	0.0185185	0.303571	0.148148	0.3	0.428571	0.909091	0.439024	0.26	0	0.0425532
solcap_snp_sl_33302	2	32.4348	0.00714286	0.00909091	0	0.08	0.2	0.142857	0.8125	0.0121951	0	0	0.0204082
CL017477-0069	2	32.4783	0	0	0	0	0	0	0	0	0	0	0
CL017477-0450	2	32.4787	0	0	0	0	0	0.139535	0.0666667	0	0	0	0
Le005019_205	2	32.5296	0.00714286	0.00909091	0	0.037037	0	0.0243902	0.615385	0.0121951	0	0	0.0204082
CL017603-0474	2	32.5613	0	0	0	0	0	0	0	0	0	0	0
CL016491-0436_solcap_snp_sl_33330	2	32.6185	0.00714286	0.00909091	0	0.153846	0.2	0.292683	0.9375	0.0121951	0	0	0.0204082
solcap_snp_sl_33334	2	32.6443	0	0	0	0.0769231	0.2	0.0714286	0.214286	0	0	0	0
CL015942-0231_solcap_snp_sl_33337	2	32.6514	0.00714286	0	0	0.08	0	0.195122	0.466667	0.0121951	0	0	0
solcap_snp_sl_14951	2	32.7074	0.189781	0.457944	0.310345	0.16	0.125	0	0	0.1875	0.2	0.416667	0.510638
solcap_snp_sl_59581	2	32.7075	0.00714286	0.00909091	0	0.037037	0	0.0487805	0.714286	0.0121951	0	0	0.0204082
CL015849-0329	2	32.9314	0	0	0	0	0	0	0	0	0	0	0
solcap_snp_sl_33416	2	32.9948	0.0070922	0.00909091	0	0.04	0	0.15	0.75	0.0121951	0	0	0.0204082
CL016463-0326_solcap_snp_sl_33432	2	33.1212	0.0070922	0.00909091	0	0.115385	0.333333	0.307692	0.9375	0.0121951	0	0	0.0204082
solcap_snp_sl_8464	2	33.1226	0.42963	0.566038	0.672414	0.48	0.222222	0.195122	0	0.474359	0.3	0.542373	0.595745
solcap_snp_sl_33459	2	33.3402	0.0070922	0	0	0	0	0.047619	0.428571	0.0121951	0	0	0
SGN-U315881_T1698_snp147	2	33.3578	0.0070922	0.00909091	0	0.04	0.3	0.125	0.875	0.0121951	0	0	0.0204082
solcap_snp_sl_33469	2	33.3733	0.0070922	0.00909091	0	0.0769231	0.222222	0.25	0.9375	0.0121951	0	0	0.0204082
Le001778_68_solcap_snp_sl_33474	2	33.5383	0.224638	0.0275229	0.0163934	0.12	0	0.179487	0.866667	0.243902	0.22449	0	0.0625
solcap_snp_sl_59619	2	33.6917	0.213235	0.0275229	0.0163934	0.153846	0	0.0952381	0.214286	0.234568	0.208333	0	0.0625
SGN-U574493_snp71	2	33.7532	0.0142857	0.0181818	0.0169492	0.259259	0.272727	0.365854	1	0.0121951	0.0196078	0.0163934	0.0204082
CL017156-0308_solcap_snp_sl_33519	2	33.7613	0.00714286	0.0181818	0	0.0740741	0.272727	0.146341	0.9375	0.0121951	0	0.0163934	0.0204082
solcap_snp_sl_33524	2	33.7855	0.00714286	0.0181818	0	0.148148	0.272727	0.146341	0.9375	0.0121951	0	0.0163934	0.0204082
CL015430-0435	2	33.8037	0	0	0	0	0	0	0	0	0	0	0
SGN-U586107_snp378_solcap_snp_sl_33547	2	33.818	0.00714286	0.0181818	0	0.115385	0.272727	0.175	0.9375	0.0121951	0	0.0163934	0.0204082
SL20141_109_CL009129-0540_solcap_snp_sl_33558	2	33.8387	0.00714286	0.0181818	0	0.115385	0.272727	0.15	0.9375	0.0121951	0	0.0163934	0.0204082
solcap_snp_sl_33579	2	34.0032	0.00714286	0.00917431	0	0.08	0	0.125	0.9375	0.0123457	0	0.0163934	0
solcap_snp_sl_8505	2	34.034	0.0514706	0.287037	0.298246	0.56	0.545455	0.538462	1	0.0625	0	0.322034	0.244898
solcap_snp_sl_8510	2	34.0922	0.037037	0.238095	0.25	0.28	0.111111	0.375	0.230769	0.025641	0.02	0.305085	0.152174
solcap_snp_sl_59647	2	34.0969	0.283582	0.339623	0.526316	0.72	0.8	0.725	0.923077	0.307692	0.244898	0.327586	0.354167
solcap_snp_sl_33595	2	34.1028	0.235294	0.0555556	0.0166667	0.12	0	0.102564	0.9375	0.259259	0.229167	0.0327869	0.0851064
SGN-U568794_snp106	2	34.1658	0.235294	0.0550459	0.0166667	0.0769231	0	0.0714286	0.1875	0.259259	0.229167	0.0327869	0.0833333
solcap_snp_sl_8512	2	34.1829	0.0367647	0.280374	0.551724	0.576923	0.909091	0.625	0.0666667	0.0379747	0	0.305085	0.25
solcap_snp_sl_8514	2	34.1957	0.285714	0.342857	0.581818	0.846154	0.909091	0.829268	1	0.307692	0.25	0.327586	0.361702
solcap_snp_sl_33611	2	34.235	0.237037	0.0555556	0.0166667	0.08	0	0.075	0.5	0.2625	0.229167	0.0327869	0.0851064
CL017581-0470_solcap_snp_sl_33624	2	34.2867	0.343066	0.0857143	0.0166667	0.08	0	0.1	0.642857	0.402439	0.208333	0.0333333	0.155556
solcap_snp_sl_33633	2	34.3477	0.343066	0.0841121	0.0166667	0.0769231	0	0.0714286	0.125	0.402439	0.208333	0.0327869	0.152174
solcap_snp_sl_8524	2	34.3828	0.30303	0.480769	0.368421	0.32	0.181818	0.195122	0	0.423077	0.12766	0.508772	0.446809
solcap_snp_sl_33636	2	34.3887	0.343066	0.0943396	0.0166667	0.125	0.363636	0.205128	0.857143	0.402439	0.208333	0.0327869	0.177778
CL005464-0159	2	34.5069	0	0	0	0	0	0	0	0	0	0	0
CL005464-0069	2	34.507	0	0	0	0.037037	0	0.0238095	0.0769231	0	0	0	0
solcap_snp_sl_10569	2	34.5542	0.280303	0.141509	0.105263	0.04	0.0909091	0.190476	0	0.166667	0.489362	0.133333	0.152174
solcap_snp_sl_36037	2	34.6008	0.34058	0.0952381	0.0166667	0.166667	0.4	0.236842	0.9375	0.395062	0.24	0.0327869	0.181818
solcap_snp_sl_10567	2	34.6155	0.646154	0.252427	0.175439	0.461538	0.666667	0.666667	1	0.584416	0.76087	0.166667	0.372093
solcap_snp_sl_10564	2	34.6331	0.643411	0.262136	0.175439	0.36	0.636364	0.5	0.9375	0.578947	0.76087	0.169492	0.386364
CL015660-0224_solcap_snp_sl_36017	2	34.6372	0.34058	0.121495	0.0166667	0.130435	0.454545	0.216216	0.8	0.395062	0.24	0.0327869	0.23913
solcap_snp_sl_10563	2	34.6568	0.352518	0.140187	0.2	0.291667	0.6	0.526316	1	0.395062	0.254902	0.0491803	0.26087
solcap_snp_sl_10557	2	34.6835	0.366906	0.140187	0.183333	0.391304	0.6	0.65	1	0.395062	0.294118	0.0491803	0.26087
solcap_snp_sl_36004	2	34.6901	0.34058	0.121495	0.0166667	0.173913	0.454545	0.236842	0.875	0.395062	0.24	0.0327869	0.23913
solcap_snp_sl_10552	2	34.7141	0.369565	0.146789	0.465517	0.6	0.363636	0.682927	0.714286	0.395062	0.3	0.0491803	0.270833
solcap_snp_sl_66052	2	34.8677	0.343066	0.138889	0.0166667	0.208333	0.4	0.375	0.9375	0.4	0.24	0.0491803	0.255319
CL009018-1241	2	34.8801	0.347826	0.138889	0.0166667	0.208333	0.4	0.410256	0.9375	0.407407	0.24	0.0491803	0.255319
2875_4_240_2875_4b_77_b	2	34.91	0.347826	0.100917	0.0163934	0.0769231	0	0.238095	0.133333	0.407407	0.24	0.0491803	0.166667
2875_4_300	2	34.91	0.347826	0.100917	0.0163934	0.0769231	0	0.333333	0.142857	0.407407	0.24	0.0491803	0.166667
2875_4b_205_b_2875_4_368	2	34.9101	0.347826	0.100917	0.0163934	0.08	0	0.333333	0.285714	0.407407	0.24	0.0491803	0.166667
2875_4_1050	2	34.9108	0.347826	0.100917	0.0163934	0.0769231	0	0.268293	0.133333	0.407407	0.24	0.0491803	0.166667
CL003810-0351	2	34.9126	0.350365	0.138889	0.0338983	0.26087	0.4	0.4	0.9375	0.407407	0.244898	0.0491803	0.255319
SL10649_1116_solcap_snp_sl_35973	2	34.9239	0.347826	0.12844	0.0333333	0.217391	0	0.315789	0.538462	0.407407	0.24	0.0491803	0.229167
solcap_snp_sl_10534	2	34.93	0.310606	0.376147	0.610169	0.48	0.444444	0.214286	0.0625	0.402597	0.125	0.409836	0.333333
solcap_snp_sl_10533	2	34.9322	0.318519	0.490909	0.35	0.185185	0.5	0.378378	0.0714286	0.166667	0.6	0.540984	0.428571
solcap_snp_sl_10531	2	34.9332	0.323529	0.490909	0.35	0.2	0.5	0.378378	0.142857	0.177215	0.6	0.540984	0.428571
solcap_snp_sl_10530	2	34.9557	0.311111	0.504587	0.3	0.115385	0.1	0.146341	0	0.166667	0.58	0.57377	0.416667
solcap_snp_sl_35968	2	34.9565	0.350365	0.111111	0.0333333	0.230769	0.2	0.358974	0.5	0.4	0.26	0.0491803	0.191489
solcap_snp_sl_35967	2	34.9568	0.355072	0.100917	0.0333333	0.192308	0	0.263158	0.266667	0.407407	0.26	0.0491803	0.166667
solcap_snp_sl_35964	2	34.9609	0.320611	0.02	0	0.0454545	0	0.0344828	0.0769231	0.351351	0.26	0	0.047619
solcap_snp_sl_35963	2	34.9612	0.355072	0.138889	0.0333333	0.26087	0.3	0.410256	0.875	0.407407	0.26	0.0491803	0.255319
solcap_snp_sl_10528	2	34.9709	0.315789	0.533981	0.326923	0.130435	0.111111	0.193548	0	0.168831	0.591837	0.603448	0.444444
solcap_snp_sl_35956	2	34.9744	0.352941	0.138889	0.0333333	0.291667	0.3	0.410256	0.9375	0.4	0.265306	0.0491803	0.255319
solcap_snp_sl_35955	2	34.9763	0.376812	0.138889	0.0689655	0.26087	0.375	0.536585	0.9375	0.407407	0.32	0.0491803	0.255319
solcap_snp_sl_35954	2	34.978	0.357664	0.101852	0.0333333	0.2	0	0.315789	0.384615	0.407407	0.265306	0.0491803	0.170213
solcap_snp_sl_10516	2	34.9849	0.300752	0.101852	0.338983	0.12	0.0909091	0.0465116	0	0.402597	0.122449	0.0327869	0.191489
solcap_snp_sl_35948	2	34.986	0.352941	0.100917	0.0344828	0.16	0	0.25641	0.1875	0.4	0.265306	0.0491803	0.166667
CL009186-0301_solcap_snp_sl_35943	2	34.9867	0.362319	0.100917	0.0338983	0.192308	0	0.25641	0.1875	0.407407	0.28	0.0491803	0.166667
solcap_snp_sl_35868	2	35.2968	0.37037	0.12844	0	0.173913	0	0.210526	0.9375	0.308642	0.458333	0.0491803	0.229167
SGN-U565295_snp33269	2	35.3697	0	0	0	0	0	0.097561	0.142857	0	0	0	0
SGN-U581789_snp1077_solcap_snp_sl_35846	2	35.3738	0.372263	0.111111	0	0.153846	0	0.075	0.714286	0.308642	0.46	0.0327869	0.212766
CL016381-0173_solcap_snp_sl_35845	2	35.3743	0.367647	0.111111	0	0.153846	0	0.075	0.714286	0.308642	0.44898	0.0327869	0.212766
solcap_snp_sl_35844	2	35.3913	0.37037	0.119266	0	0.0909091	0	0.184211	0.857143	0.308642	0.458333	0.0327869	0.229167
solcap_snp_sl_21744	2	35.4655	0.384615	0.305556	0.464286	0.5	0.3	0.25	0	0.519481	0.170213	0.344262	0.255319
solcap_snp_sl_35821	2	35.4934	0.0785714	0.0458716	0	0.0416667	0	0.179487	0.785714	0.0243902	0.176471	0.0327869	0.0625
CL016680-0509	2	35.5518	0.0780142	0.0366972	0	0.0769231	0	0.075	0.642857	0.0243902	0.173077	0.0327869	0.0416667
solcap_snp_sl_25485	2	35.591	0.274074	0.037037	0	0.0833333	0	0.05	0.857143	0.179487	0.46	0.0327869	0.0425532
solcap_snp_sl_25482	2	35.6637	0.278195	0.037037	0	0.0384615	0.363636	0.0769231	0.8	0.181818	0.469388	0.0327869	0.0425532
solcap_snp_sl_25481	2	35.6637	0.274074	0.037037	0	0.0384615	0	0.0487805	0.692308	0.179487	0.46	0.0327869	0.0425532
solcap_snp_sl_25477	2	35.687	0.276119	0.0275229	0	0.08	0	0.0487805	0.4	0.179487	0.469388	0.0163934	0.0416667
solcap_snp_sl_25475	2	35.6932	0.278195	0.0277778	0	0.08	0	0.0487805	0.428571	0.181818	0.469388	0.0163934	0.0425532
solcap_snp_sl_25473	2	35.6979	0.274074	0.037037	0	0.04	0.363636	0.0526316	0.714286	0.179487	0.46	0.0327869	0.0425532
solcap_snp_sl_25472	2	35.701	0.278195	0.0458716	0	0.0833333	0.363636	0.219512	0.933333	0.181818	0.469388	0.0327869	0.0625
solcap_snp_sl_25470	2	35.7026	0.278195	0.037037	0	0.0416667	0	0.131579	0.666667	0.181818	0.469388	0.0327869	0.0425532
solcap_snp_sl_35802	2	35.7044	0.274074	0.037037	0	0.0833333	0.3	0.225	0.928571	0.179487	0.46	0.0166667	0.0625
solcap_snp_sl_35798	2	35.7067	0.278195	0.0458716	0	0.0833333	0.3	0.219512	0.866667	0.181818	0.469388	0.0327869	0.0625
solcap_snp_sl_25469	2	35.7126	0.285714	0.0458716	0	0.0833333	0.363636	0.609756	0.9375	0.181818	0.489796	0.0327869	0.0625
solcap_snp_sl_35797	2	35.7348	0.278195	0.00909091	0	0.037037	0.363636	0.0512821	0.416667	0.181818	0.469388	0.0163934	0
solcap_snp_sl_25463	2	35.7473	0.278195	0.0366972	0	0.0384615	0	0.025641	0.4	0.181818	0.469388	0.0327869	0.0416667
solcap_snp_sl_25460	2	35.7495	0.278195	0.0277778	0	0.08	0	0.0243902	0.384615	0.181818	0.469388	0.0163934	0.0425532
solcap_snp_sl_25454	2	35.7878	0.278195	0.0458716	0	0.0833333	0.363636	0.225	0.933333	0.181818	0.469388	0.0327869	0.0625
solcap_snp_sl_25453	2	35.7976	0.278195	0.037037	0	0.08	0	0.0526316	0.785714	0.181818	0.469388	0.0327869	0.0425532
solcap_snp_sl_35791	2	35.7988	0.276119	0.0366972	0	0.08	0.25	0.105263	0.769231	0.179487	0.469388	0.0327869	0.0416667
solcap_snp_sl_25449	2	35.8017	0.278195	0.0181818	0	0.0769231	0.363636	0.0789474	0.357143	0.181818	0.469388	0.0327869	0
solcap_snp_sl_25448	2	35.8027	0.278195	0.0181818	0	0.037037	0	0.0487805	0.214286	0.181818	0.469388	0.0327869	0
solcap_snp_sl_25444	2	35.8761	0.278195	0.0277778	0	0.08	0	0.103448	0.416667	0.181818	0.469388	0.0163934	0.0425532
solcap_snp_sl_25443	2	35.8775	0.278195	0.0458716	0	0.0833333	0	0.153846	0.857143	0.181818	0.469388	0.0327869	0.0625
solcap_snp_sl_25442	2	35.887	0.278195	0.037037	0	0.0384615	0	0.05	0.266667	0.181818	0.469388	0.0327869	0.0425532
solcap_snp_sl_25441	2	35.8875	0.278195	0.0458716	0	0.0833333	0.363636	0.219512	0.9375	0.181818	0.469388	0.0327869	0.0625
solcap_snp_sl_25440	2	35.8876	0.278195	0.037037	0	0.04	0	0.05	0.266667	0.181818	0.469388	0.0327869	0.0425532
solcap_snp_sl_25439	2	35.8879	0.278195	0.037037	0	0.0384615	0	0.05	0.266667	0.181818	0.469388	0.0327869	0.0425532
solcap_snp_sl_25438	2	35.8882	0.278195	0.037037	0	0.0384615	0	0.05	0.266667	0.181818	0.469388	0.0327869	0.0425532
solcap_snp_sl_35789	2	35.8887	0.278195	0.037037	0	0.0384615	0	0.05	0.266667	0.181818	0.469388	0.0327869	0.0425532
solcap_snp_sl_25433	2	35.8903	0.278195	0.0458716	0	0.0833333	0.363636	0.219512	0.9375	0.181818	0.469388	0.0327869	0.0625
solcap_snp_sl_35787	2	35.8904	0.278195	0.037037	0	0.0384615	0	0.05	0.266667	0.181818	0.469388	0.0327869	0.0425532
solcap_snp_sl_25432	2	35.9041	0.278195	0.0272727	0	0.04	0	0.157895	0.733333	0.181818	0.469388	0.0327869	0.0204082
solcap_snp_sl_25431	2	35.9046	0.278195	0.0181818	0	0	0	0.075	0.25	0.181818	0.469388	0.0327869	0
solcap_snp_sl_35784	2	35.9142	0.281481	0.0458716	0	0.0833333	0.333333	0.609756	0.9375	0.179487	0.48	0.0327869	0.0625
solcap_snp_sl_25429	2	35.9314	0.278195	0.00909091	0	0	0	0.0731707	0.1875	0.181818	0.469388	0.0163934	0
solcap_snp_sl_25428	2	35.9321	0.278195	0.00909091	0	0	0	0.0731707	0.1875	0.181818	0.469388	0.0163934	0
solcap_snp_sl_35780	2	35.9469	0.270677	0.0277778	0	0	0	0.121951	0.25	0.168831	0.469388	0.0163934	0.0425532
solcap_snp_sl_35779	2	35.9493	0.278195	0.0555556	0	0.0416667	0.333333	0.658537	1	0.168831	0.489796	0.0327869	0.0851064
solcap_snp_sl_35778	2	35.9496	0.268657	0.037037	0	0.0384615	0	0.125	0.583333	0.166667	0.469388	0.0327869	0.0425532
solcap_snp_sl_35777	2	35.9619	0.270677	0.037037	0	0.04	0	0.131579	0.733333	0.168831	0.469388	0.0327869	0.0425532
SL10923_448	2	35.9706	0.266667	0.0555556	0	0.0416667	0.363636	0.243902	0.9375	0.166667	0.46	0.0327869	0.0851064
solcap_snp_sl_35776	2	35.9763	0.270677	0.037037	0	0.0384615	0	0.128205	0.615385	0.168831	0.469388	0.0327869	0.0425532
solcap_snp_sl_35774	2	35.9821	0.270677	0.037037	0	0.0384615	0	0.128205	0.615385	0.168831	0.469388	0.0327869	0.0425532
solcap_snp_sl_25427	2	35.9859	0.268657	0.0275229	0	0	0	0.102564	0.428571	0.168831	0.46	0.0163934	0.0416667
solcap_snp_sl_25422	2	35.9904	0.270677	0.0185185	0	0	0.363636	0.243902	0.666667	0.168831	0.469388	0.0163934	0.0212766
solcap_snp_sl_25421	2	35.9905	0.264706	0.00909091	0	0	0	0.102564	0.307692	0.164557	0.46	0.0163934	0
solcap_snp_sl_65977	2	35.9905	0.266667	0.00909091	0	0	0	0.102564	0.307692	0.166667	0.46	0.0163934	0
solcap_snp_sl_65976	2	36.0051	0.268657	0.0555556	0	0.0416667	0.363636	0.219512	0.9375	0.166667	0.469388	0.0327869	0.0851064
solcap_snp_sl_35771	2	36.0052	0.268657	0.00917431	0	0.0384615	0	0.102564	0.533333	0.166667	0.469388	0.0163934	0
solcap_snp_sl_65975	2	36.0054	0.270677	0.0181818	0	0.0384615	0	0.157895	0.714286	0.168831	0.469388	0.0163934	0.0204082
solcap_snp_sl_25420	2	36.0056	0.266667	0.00917431	0	0.037037	0	0.102564	0.571429	0.166667	0.46	0.0163934	0
solcap_snp_sl_25418	2	36.0095	0.268657	0.0458716	0	0.04	0	0.157895	0.857143	0.166667	0.469388	0.0327869	0.0625
solcap_snp_sl_15574	2	36.0095	0	0.283019	0.271186	0.230769	0	0.0232558	0	0	0	0.440678	0.0851064
solcap_snp_sl_25417	2	36.0095	0.268657	0.0458716	0	0.04	0	0.157895	0.857143	0.166667	0.469388	0.0327869	0.0625
solcap_snp_sl_25415	2	36.0123	0.270677	0.0275229	0	0	0	0.1	0.25	0.168831	0.469388	0.0163934	0.0416667
solcap_snp_sl_35770	2	36.0331	0.281481	0.0458716	0	0.04	0	0.216216	0.857143	0.179487	0.48	0.0327869	0.0625
SGN-U149575_TG14_snp657	2	36.0548	0.281481	0.0458716	0	0.04	0	0.15	0.769231	0.179487	0.48	0.0327869	0.0625
solcap_snp_sl_25414	2	36.0579	0.283582	0.0555556	0	0.0416667	0.2	0.205128	0.9375	0.179487	0.489796	0.0327869	0.0851064
solcap_snp_sl_35764	2	36.1033	0.283582	0.0458716	0	0.0416667	0	0.157895	0.866667	0.179487	0.489796	0.0327869	0.0625
CL015861-0082	2	36.1034	0	0	0	0	0	0	0	0	0	0	0
CL015861-0134	2	36.1034	0	0	0	0.037037	0	0	0	0	0	0	0
solcap_snp_sl_25409	2	36.1258	0.281481	0.0183486	0	0	0	0.025641	0.266667	0.192308	0.46	0.0327869	0
solcap_snp_sl_25408	2	36.126	0.281481	0.0183486	0	0	0	0.0512821	0.214286	0.192308	0.46	0.0327869	0
solcap_snp_sl_25406	2	36.1394	0.283582	0.037037	0	0.04	0	0.0512821	0.785714	0.192308	0.469388	0.0327869	0.0425532
solcap_snp_sl_25405	2	36.1713	0.283582	0.0366972	0	0.0416667	0.2	0.15	0.9375	0.192308	0.469388	0.0327869	0.0416667
solcap_snp_sl_25403	2	36.2037	0.283582	0.0277778	0	0.0416667	0.272727	0.128205	0.846154	0.192308	0.469388	0.0327869	0.0212766
solcap_snp_sl_25402	2	36.2039	0.283582	0.0181818	0	0.0384615	0	0.0243902	0.461538	0.192308	0.469388	0.0327869	0
solcap_snp_sl_25401	2	36.237	0.279412	0.0181818	0	0	0	0.0238095	0.1875	0.189873	0.46	0.0327869	0
solcap_snp_sl_35759	2	36.237	0.281481	0.0183486	0	0.0384615	0	0.075	0.571429	0.192308	0.46	0.0327869	0
solcap_snp_sl_35758	2	36.2373	0.283582	0.0181818	0	0.0384615	0	0.0243902	0.538462	0.192308	0.469388	0.0327869	0
SL10346_156	2	36.273	0.286765	0.0366972	0	0.0416667	0.272727	0.15	0.9375	0.189873	0.48	0.0327869	0.0416667
solcap_snp_sl_35757	2	36.282	0.283582	0.0183486	0	0.0384615	0	0.0238095	0.5	0.192308	0.469388	0.0327869	0
SGN-U574837_snp399	2	36.2841	0.286765	0.0366972	0	0.0416667	0.272727	0.15	0.9375	0.189873	0.48	0.0327869	0.0416667
solcap_snp_sl_35755	2	36.299	0.283582	0.00909091	0	0.0384615	0	0.025	0.538462	0.192308	0.469388	0.0163934	0
solcap_snp_sl_25398	2	36.309	0.283582	0.0272727	0	0.0416667	0	0.131579	0.857143	0.192308	0.469388	0.0327869	0.0204082
solcap_snp_sl_35754	2	36.3091	0.283582	0.0272727	0	0.0416667	0	0.131579	0.857143	0.192308	0.469388	0.0327869	0.0204082
solcap_snp_sl_35753	2	36.3094	0.283582	0.0272727	0	0.0416667	0	0.131579	0.857143	0.192308	0.469388	0.0327869	0.0204082
solcap_snp_sl_35752	2	36.3095	0.283582	0.00917431	0	0	0	0.025641	0.214286	0.192308	0.469388	0.0163934	0
SGN-U584790_snp107	2	36.3095	0.279412	0.0183486	0	0.04	0	0.0487805	0.785714	0.189873	0.46	0.0327869	0
solcap_snp_sl_49304	2	36.3655	0.281481	0.00909091	0	0	0	0.0238095	0.357143	0.192308	0.46	0.0163934	0
solcap_snp_sl_23849	2	36.3657	0.281481	0.00909091	0	0	0	0.0238095	0.357143	0.192308	0.46	0.0163934	0
solcap_snp_sl_29517	2	36.3785	0.272059	0.00909091	0	0	0	0.0232558	0.0625	0.177215	0.46	0.0163934	0
solcap_snp_sl_23850	2	36.4025	0.288889	0.349515	0.0491803	0.0833333	0.272727	0.190476	0.866667	0.189873	0.489796	0.474576	0.181818
solcap_snp_sl_13513	2	36.4038	0.281481	0.343137	0.0333333	0.0833333	0	0.146341	0.785714	0.189873	0.469388	0.474576	0.162791
solcap_snp_sl_13514	2	36.4047	0.294118	0.349515	0.0491803	0.166667	0.272727	0.560976	0.9375	0.189873	0.5	0.474576	0.181818
solcap_snp_sl_13515	2	36.4113	0.286765	0.343137	0.0491803	0.0384615	0	0.0232558	0.375	0.189873	0.48	0.482759	0.159091
solcap_snp_sl_13516	2	36.4114	0.286765	0.343137	0.0491803	0.04	0.181818	0.025	0.666667	0.189873	0.48	0.482759	0.159091
solcap_snp_sl_13517	2	36.4118	0.281481	0.33	0.0333333	0.0384615	0.181818	0.0243902	0.666667	0.189873	0.469388	0.473684	0.139535
solcap_snp_sl_13518	2	36.4119	0.281481	0.336634	0.0333333	0.04	0.181818	0.0238095	0.666667	0.189873	0.469388	0.482759	0.139535
solcap_snp_sl_13519	2	36.4119	0.286765	0.343137	0.0491803	0.0384615	0.181818	0.0243902	0.666667	0.189873	0.48	0.482759	0.159091
solcap_snp_sl_23851	2	36.4132	0.286765	0.336634	0.0491803	0.0384615	0.181818	0.0243902	0.666667	0.189873	0.48	0.473684	0.159091
solcap_snp_sl_13523	2	36.4226	0.291045	0.346535	0.05	0.0416667	0	0.025	0.642857	0.192308	0.489796	0.482759	0.162791
solcap_snp_sl_13526	2	36.4232	0.286765	0.346535	0.0333333	0.12	0.181818	0.05	0.933333	0.189873	0.48	0.482759	0.162791
solcap_snp_sl_13527	2	36.4234	0.291045	0.34	0.05	0.12	0.181818	0.05	0.933333	0.192308	0.489796	0.473684	0.162791
solcap_snp_sl_13528	2	36.4237	0.286765	0.346535	0.0491803	0.12	0.181818	0.025	0.785714	0.189873	0.48	0.482759	0.162791
solcap_snp_sl_13529	2	36.4239	0.291971	0.346535	0.0491803	0.115385	0.25	0.025	0.785714	0.2	0.48	0.482759	0.162791
solcap_snp_sl_13530	2	36.424	0.286765	0.34	0.0491803	0.12	0.181818	0.025	0.785714	0.189873	0.48	0.473684	0.162791
solcap_snp_sl_13531	2	36.4251	0.286765	0.354167	0.05	0.12	0.181818	0.0625	0.933333	0.189873	0.48	0.482143	0.175
solcap_snp_sl_13534	2	36.4268	0.288889	0.343137	0.0491803	0.0769231	0	0.0232558	0.25	0.189873	0.489796	0.482759	0.159091
solcap_snp_sl_29520	2	36.4322	0.286765	0.346535	0.0491803	0.125	0	0.15	0.692308	0.189873	0.48	0.473684	0.181818
solcap_snp_sl_13545	2	36.4421	0.281481	0.333333	0.0333333	0.12	0	0.102564	0.846154	0.189873	0.469388	0.473684	0.142857
solcap_snp_sl_29521	2	36.4422	0.286765	0.34	0.0491803	0.12	0	0.05	0.846154	0.189873	0.48	0.473684	0.162791
solcap_snp_sl_13546	2	36.4455	0.288889	0.34	0.05	0.12	0	0.05	0.846154	0.189873	0.489796	0.473684	0.162791
solcap_snp_sl_29522	2	36.4682	0.286765	0.288462	0.0491803	0.12	0	0.025	0.785714	0.189873	0.48	0.416667	0.113636
solcap_snp_sl_29523	2	36.4797	0.286765	0.281553	0.0491803	0.12	0	0.025	0.785714	0.189873	0.48	0.40678	0.113636
solcap_snp_sl_13549	2	36.491	0.286765	0.288462	0.0491803	0.115385	0	0.05	0.8	0.189873	0.48	0.416667	0.113636
solcap_snp_sl_13550	2	36.4911	0.286765	0.288462	0.0491803	0.12	0	0.05	0.8	0.189873	0.48	0.416667	0.113636
solcap_snp_sl_13552	2	36.4912	0.286765	0.288462	0.0491803	0.12	0	0.05	0.8	0.189873	0.48	0.416667	0.113636
solcap_snp_sl_23856	2	36.4914	0.288889	0.281553	0.0491803	0.12	0	0.05	0.785714	0.189873	0.489796	0.40678	0.113636
solcap_snp_sl_29524	2	36.4996	0.291045	0.295238	0.0491803	0.125	0	0.170732	0.785714	0.192308	0.489796	0.416667	0.133333
solcap_snp_sl_23857	2	36.5197	0.286765	0.288462	0.0491803	0.115385	0	0.0487805	0.733333	0.189873	0.48	0.416667	0.113636
solcap_snp_sl_13554	2	36.543	0.286765	0.285714	0.0491803	0.0384615	0	0.0487805	0.428571	0.189873	0.48	0.416667	0.111111
solcap_snp_sl_13555	2	36.5439	0.294118	0.307692	0.0491803	0.0833333	0.272727	0.195122	0.9375	0.189873	0.5	0.416667	0.159091
solcap_snp_sl_13556	2	36.5445	0.286765	0.278846	0.0491803	0.037037	0	0.0232558	0.25	0.189873	0.48	0.40678	0.111111
solcap_snp_sl_13557	2	36.5453	0.281481	0.278846	0.0333333	0.037037	0	0.0232558	0.25	0.189873	0.469388	0.416667	0.0909091
solcap_snp_sl_13558	2	36.5593	0.286765	0.295238	0.0819672	0.125	0	0.358974	0.846154	0.189873	0.48	0.40678	0.152174
solcap_snp_sl_13559	2	36.5722	0.294118	0.307692	0.0491803	0.0833333	0.333333	0.190476	0.8	0.189873	0.5	0.416667	0.159091
solcap_snp_sl_29526	2	36.5978	0.288889	0.300971	0.0333333	0.125	0.333333	0.121951	0.866667	0.189873	0.489796	0.40678	0.159091
Le013093s_150	2	36.645	0.279412	0.32381	0.0491803	0.125	0	0.0540541	0.909091	0.1875	0.469388	0.416667	0.2
solcap_snp_sl_29527	2	36.6909	0.281481	0.304762	0.0491803	0.0384615	0	0.025	0.571429	0.189873	0.469388	0.40678	0.173913
solcap_snp_sl_49311	2	36.691	0.283582	0.304762	0.0491803	0.0384615	0	0.025	0.571429	0.192308	0.469388	0.416667	0.155556
solcap_snp_sl_29528	2	36.697	0.281481	0.308411	0.0491803	0.0384615	0	0.0232558	0.125	0.189873	0.469388	0.416667	0.170213
solcap_snp_sl_13561	2	36.7165	0.286765	0.314286	0.0491803	0.0384615	0.333333	0.05	0.384615	0.189873	0.48	0.4	0.2
solcap_snp_sl_13566	2	36.7411	0.283582	0.304762	0.0491803	0.115385	0	0.0487805	0.6	0.194805	0.46	0.40678	0.173913
solcap_snp_sl_49312	2	36.7491	0.287879	0.304762	0.05	0.08	0	0.025	0.333333	0.197368	0.469388	0.40678	0.173913
solcap_snp_sl_13567	2	36.766	0.283582	0.314286	0.0327869	0.12	0	0.025641	0.733333	0.194805	0.46	0.423729	0.173913
solcap_snp_sl_29531	2	36.767	0.283582	0.327103	0.0327869	0.115385	0	0.0512821	0.733333	0.194805	0.46	0.433333	0.191489
SL10771_467	2	36.8046	0.283582	0.317757	0.0327869	0.08	0	0.025641	0.8	0.194805	0.46	0.416667	0.191489
solcap_snp_sl_13569	2	36.8186	0.283582	0.28972	0.0327869	0.0769231	0	0.0487805	0.714286	0.194805	0.46	0.366667	0.191489
solcap_snp_sl_13574	2	36.8287	0.293233	0.305556	0.0327869	0.0833333	0.333333	0.175	0.9375	0.194805	0.489796	0.366667	0.229167
solcap_snp_sl_23861	2	36.8427	0.283582	0.287037	0.0327869	0.0384615	0	0.0238095	0.3125	0.194805	0.46	0.366667	0.1875
solcap_snp_sl_13578	2	36.8483	0.283582	0.287037	0.0327869	0.0384615	0	0.0238095	0.3125	0.194805	0.46	0.366667	0.1875
solcap_snp_sl_13579	2	36.8483	0.283582	0.280374	0.0327869	0.04	0	0.0238095	0.3125	0.194805	0.46	0.355932	0.1875
solcap_snp_sl_13580	2	36.8484	0.285714	0.273585	0.0166667	0.0384615	0	0.0238095	0.3125	0.194805	0.469388	0.355932	0.170213
solcap_snp_sl_13581	2	36.8485	0.283582	0.273585	0.0166667	0.04	0	0.0238095	0.3125	0.194805	0.46	0.355932	0.170213
solcap_snp_sl_49318	2	36.8522	0.285714	0.247619	0.0333333	0.04	0	0.0232558	0.1875	0.194805	0.469388	0.333333	0.133333
solcap_snp_sl_13582	2	36.8717	0.293233	0.293578	0.0327869	0.0833333	0.333333	0.175	0.9375	0.194805	0.489796	0.344262	0.229167
solcap_snp_sl_13584	2	36.8817	0.283582	0.277778	0.0327869	0.08	0	0.05	0.714286	0.194805	0.46	0.344262	0.191489
solcap_snp_sl_13586	2	36.901	0.283582	0.257143	0.0166667	0.08	0	0.05	0.785714	0.194805	0.46	0.322034	0.173913
S_744	2	36.9152	0	0	0	0.037037	0	0.0238095	0.428571	0	0	0	0
S_427	2	36.9155	0.283582	0.277778	0.0327869	0.08	0	0.125	0.928571	0.194805	0.46	0.333333	0.208333
solcap_snp_sl_4573	2	36.9321	0.330827	0.842593	0.232143	0.0869565	0.166667	0.473684	0.9375	0.207792	0.571429	1	0.638298
solcap_snp_sl_13589	2	36.9322	0.283582	0.266055	0.0327869	0.037037	0	0.0232558	0.1875	0.194805	0.46	0.327869	0.1875
solcap_snp_sl_13590	2	36.9326	0.285714	0.284404	0.0327869	0.0833333	0.166667	0.125	0.9375	0.194805	0.469388	0.344262	0.208333
CL009035-0516	2	36.9598	0.283582	0.287037	0.0327869	0.0769231	0	0.05	0.8	0.194805	0.46	0.360656	0.191489
CL009035-0571	2	36.9599	0	0	0	0	0	0	0	0	0	0	0
solcap_snp_sl_13595	2	36.9624	0.285714	0.287037	0.0327869	0.08	0	0.05	0.8	0.194805	0.469388	0.360656	0.191489
solcap_snp_sl_13596	2	36.9626	0.283582	0.259615	0.0166667	0.08	0	0.05	0.8	0.194805	0.46	0.327586	0.173913
solcap_snp_sl_13597	2	36.9626	0.287879	0.280374	0.0327869	0.0769231	0	0.025641	0.733333	0.197368	0.469388	0.35	0.191489
solcap_snp_sl_13599	2	36.9636	0.283582	0.287037	0.0327869	0.0833333	0.166667	0.1	0.9375	0.194805	0.46	0.360656	0.191489
solcap_snp_sl_13600	2	36.9637	0.287879	0.287037	0.0333333	0.0833333	0.166667	0.1	0.9375	0.197368	0.469388	0.35	0.208333
solcap_snp_sl_13603	2	36.9723	0.285714	0.293578	0.0327869	0.0833333	0	0.1	0.928571	0.194805	0.469388	0.360656	0.208333
solcap_snp_sl_29538	2	36.9762	0.283582	0.277778	0.0327869	0.0769231	0	0.0243902	0.4	0.194805	0.46	0.35	0.1875
solcap_snp_sl_13604	2	36.9763	0.285714	0.287037	0.0327869	0.12	0	0.1	0.928571	0.194805	0.469388	0.35	0.208333
solcap_snp_sl_13605	2	36.9764	0.280303	0.287037	0.0333333	0.12	0	0.1	0.923077	0.194805	0.458333	0.360656	0.191489
solcap_snp_sl_13606	2	36.9854	0.283582	0.280374	0.0166667	0.0416667	0	0.0769231	0.615385	0.194805	0.46	0.35	0.191489
solcap_snp_sl_29540	2	36.9873	0.287879	0.287037	0.0333333	0.04	0	0.0238095	0.2	0.197368	0.469388	0.366667	0.1875
solcap_snp_sl_29541	2	36.9878	0.283582	0.293578	0.0327869	0.0833333	0.166667	0.1	0.9375	0.194805	0.46	0.360656	0.208333
solcap_snp_sl_49322	2	37.01	0.288889	0.277778	0.0327869	0.0769231	0	0.0243902	0.571429	0.194805	0.470588	0.35	0.1875
solcap_snp_sl_23863	2	37.0105	0.291045	0.284404	0.0327869	0.0769231	0	0.0243902	0.571429	0.194805	0.48	0.360656	0.1875
solcap_snp_sl_29543	2	37.0114	0.288889	0.287037	0.0327869	0.0769231	0	0.047619	0.583333	0.194805	0.470588	0.360656	0.191489
solcap_snp_sl_29545	2	37.0134	0.288889	0.287037	0.0166667	0.0833333	0	0.1	0.933333	0.194805	0.470588	0.360656	0.191489
solcap_snp_sl_29546	2	37.0135	0.293233	0.293578	0.0327869	0.0833333	0	0.1	0.933333	0.197368	0.48	0.360656	0.208333
solcap_snp_sl_4578	2	37.0382	0.313433	0.509259	0.160714	0	0	0.047619	0	0.194805	0.54	0.6	0.395833
solcap_snp_sl_13611	2	37.0431	0.0070922	0.302752	0.0327869	0.0384615	0	0.0232558	0.357143	0.0121951	0	0.377049	0.208333
solcap_snp_sl_13612	2	37.0433	0.0070922	0.305556	0.0327869	0.0833333	0	0.1	0.928571	0.0121951	0	0.377049	0.212766
solcap_snp_sl_13616	2	37.0436	0.0070922	0.299065	0.0166667	0.0833333	0	0.1	0.928571	0.0121951	0	0.366667	0.212766
solcap_snp_sl_13617	2	37.0438	0.0070922	0.305556	0.0333333	0.166667	0.0833333	0.230769	0.9375	0.0121951	0	0.377049	0.212766
solcap_snp_sl_13618	2	37.0438	0.0070922	0.305556	0.0327869	0.0833333	0	0.1	0.928571	0.0121951	0	0.377049	0.212766
solcap_snp_sl_13619	2	37.0439	0.0070922	0.302752	0.0327869	0.0384615	0	0.0232558	0.357143	0.0121951	0	0.377049	0.208333
solcap_snp_sl_29547	2	37.0445	0.00714286	0.301887	0.0327869	0.12	0	0.1	0.928571	0.0121951	0	0.372881	0.212766
solcap_snp_sl_13621	2	37.0565	0.0070922	0.305556	0.0327869	0.12	0	0.1	0.933333	0.0121951	0	0.377049	0.212766
solcap_snp_sl_13622	2	37.0566	0.0070922	0.305556	0.0327869	0.12	0	0.1	0.933333	0.0121951	0	0.377049	0.212766
solcap_snp_sl_13623	2	37.0568	0.00714286	0.305556	0.0333333	0.2	0.0833333	0.128205	0.9375	0.0121951	0	0.377049	0.212766
solcap_snp_sl_13625	2	37.0702	0.0070922	0.333333	0.0333333	0.0833333	0	0.097561	0.6875	0.0121951	0	0.433333	0.208333
solcap_snp_sl_13627	2	37.0716	0.0070922	0.33945	0.0327869	0.115385	0	0.075	0.571429	0.0121951	0	0.442623	0.208333
solcap_snp_sl_29548	2	37.0723	0.0070922	0.333333	0.0327869	0.08	0	0.075	0.538462	0.0121951	0	0.433333	0.208333
solcap_snp_sl_13630	2	37.0725	0.0070922	0.333333	0.0327869	0.037037	0	0.0232558	0.0625	0.0121951	0	0.433333	0.208333
solcap_snp_sl_13631	2	37.082	0.0070922	0.336449	0.0327869	0.0833333	0.166667	0.1	0.9375	0.0121951	0	0.433333	0.212766
solcap_snp_sl_29549	2	37.1157	0.0070922	0.333333	0.0327869	0.0833333	0	0.0512821	0.857143	0.0121951	0	0.442623	0.191489
solcap_snp_sl_13632	2	37.116	0.0070922	0.336449	0.0327869	0.0833333	0	0.0512821	0.857143	0.0121951	0	0.45	0.191489
solcap_snp_sl_13633	2	37.1161	0.0070922	0.330189	0.0327869	0.0833333	0	0.0512821	0.857143	0.0121951	0	0.440678	0.191489
solcap_snp_sl_13634	2	37.1162	0.0070922	0.327103	0.0327869	0.0833333	0	0.0512821	0.857143	0.0121951	0	0.433333	0.191489
solcap_snp_sl_13635	2	37.1363	0.0070922	0.314815	0.0327869	0.037037	0	0.0232558	0.0625	0.0121951	0	0.416667	0.1875
solcap_snp_sl_13636	2	37.1452	0.0070922	0.333333	0.0327869	0.12	0.166667	0.0512821	0.9375	0.0121951	0	0.442623	0.191489
solcap_snp_sl_13638	2	37.1635	0.0070922	0.324074	0.0327869	0.037037	0	0.0232558	0.0666667	0.0121951	0	0.433333	0.1875
solcap_snp_sl_49326	2	37.1635	0.0070922	0.324074	0.0327869	0.0384615	0.166667	0.0243902	0.642857	0.0121951	0	0.433333	0.1875
solcap_snp_sl_49327	2	37.172	0.0070922	0.0833333	0.0166667	0.04	0	0.025641	0.923077	0.0121951	0	0.0983607	0.0638298
solcap_snp_sl_29565	2	37.2472	0.0070922	0.0833333	0.0166667	0.0416667	0	0.05	0.933333	0.0121951	0	0.0983607	0.0638298
solcap_snp_sl_29567	2	37.2722	0.0070922	0.0740741	0.0327869	0	0	0.025	0.714286	0.0121951	0	0.0819672	0.0638298
241_2R_407	2	37.3748	0.29771	0.17757	0.827586	0.875	0.833333	0.717949	0.0625	0.25	0.346939	0	0.413043
241_2F_264_241_2b_60_b	2	37.3767	0.294574	0.169811	0.827586	0.875	0.833333	0.75	0.0666667	0.25	0.340426	0	0.4
solcap_snp_sl_29602	2	37.4609	0.0070922	0.0833333	0.0169492	0.0833333	0.25	0.128205	0.666667	0.0121951	0	0.0983607	0.0638298
SGN-U575873_snp121	2	37.5085	0.0070922	0.0642202	0.0327869	0.16	0.0833333	0.166667	0.769231	0.0121951	0	0.0983607	0.0208333
SGN-U313785_cLEF-41-C3_snp208	2	37.5092	0.0070922	0.0642202	0.0166667	0.166667	0.0833333	0.162162	0.866667	0.0121951	0	0.0983607	0.0208333
solcap_snp_sl_29627	2	37.5548	0.0070922	0.0642202	0.0166667	0.16	0	0.210526	0.769231	0.0121951	0	0.0983607	0.0208333
solcap_snp_sl_29658	2	37.6636	0.0070922	0.0825688	0.0163934	0.153846	0	0.0238095	0.3125	0.0121951	0	0.0983607	0.0625
CL009189-0414	2	37.7523	0.0141844	0.0740741	0.0166667	0.24	0.272727	0.157895	0.9375	0.0121951	0.0192308	0.0983607	0.0425532
SL10801_170	2	37.7525	0.0070922	0.0733945	0.0163934	0.0740741	0	0.0238095	0.307692	0.0121951	0	0.0983607	0.0416667
solcap_snp_sl_23882	2	37.7919	0.842105	0.0925926	0.224138	0.115385	0.25	0.047619	0	0.857143	0.843137	0.0163934	0.191489
CL016172-0092	2	37.8303	0	0	0	0	0	0	0	0	0	0	0
CL016172-0398_solcap_snp_sl_29710	2	37.8306	0.0070922	0.0275229	0	0.192308	0	0.131579	0.866667	0.0121951	0	0.0327869	0.0208333
solcap_snp_sl_29720	2	37.8588	0.0070922	0.0373832	0	0.166667	0	0.210526	0.866667	0.0121951	0	0.0338983	0.0416667
solcap_snp_sl_23883	2	37.9113	0.857143	0.101852	0.241379	0.24	0.2	0.268293	0.0625	0.87013	0.862745	0.0163934	0.212766
solcap_snp_sl_23884	2	38.0095	0.69697	0.0934579	0.183333	0.115385	0.2	0.0465116	0	0.675676	0.807692	0.0163934	0.195652
solcap_snp_sl_29749	2	38.0124	0.0070922	0.0272727	0	0.2	0	0.102564	0.857143	0.0121951	0	0.0327869	0.0204082
solcap_snp_sl_29766	2	38.0926	0.0070922	0.0366972	0	0.230769	0	0.0833333	0.857143	0.0121951	0	0.0327869	0.0416667
solcap_snp_sl_29779	2	38.1289	0.0070922	0.0363636	0	0.269231	0	0.157895	0.933333	0.0121951	0	0.0327869	0.0408163
CL016725-0417	2	38.137	0.0070922	0.0181818	0	0.153846	0	0.0238095	0.8	0.0121951	0	0.0327869	0
CL016725-0239	2	38.1372	0	0	0	0	0	0	0	0	0	0	0
solcap_snp_sl_29785	2	38.168	0.0070922	0.0272727	0	0.230769	0	0.15	0.933333	0.0121951	0	0.0327869	0.0204082
SGN-U585712_snp102623	2	38.217	0	0	0	0.0769231	0	0.05	0.142857	0	0	0	0
SGN-U585712_snp101557	2	38.218	0	0	0	0.0384615	0	0.0487805	0.133333	0	0	0	0
solcap_snp_sl_29789	2	38.2313	0.0070922	0.0183486	0	0.16	0	0.0731707	0.615385	0.0121951	0	0.0327869	0
SGN-U581277_snp815	2	38.264	0.0212766	0.0183486	0	0.230769	0	0.1	0.5	0.0243902	0.0192308	0.0327869	0
solcap_snp_sl_29814	2	38.4204	0.125	0.0183486	0	0.153846	0	0.0243902	0.642857	0.164557	0.0196078	0.0327869	0
solcap_snp_sl_29826	2	38.5341	0.125	0.0183486	0	0.185185	0	0.025	0.769231	0.164557	0.0196078	0.0327869	0
solcap_snp_sl_29840	2	38.6334	0.154472	0.0272727	0	0.28	0	0.179487	0.9375	0.197183	0.0434783	0.0327869	0.0204082
solcap_snp_sl_18397	2	38.8237	0.0882353	0.254717	0.637931	0.518519	0.8	0.560976	0	0.0987654	0.0625	0.2	0.326087
solcap_snp_sl_18398	2	38.8345	0.0882353	0.301887	0.696429	0.88	1	0.883721	1	0.0987654	0.0625	0.25	0.369565
solcap_snp_sl_18399	2	38.835	0.0875912	0.299065	0.719298	0.88	1	0.976744	1	0.0987654	0.0612245	0.25	0.361702
solcap_snp_sl_18400	2	38.8357	0.0882353	0.301887	0.709091	0.88	1	0.883721	1	0.0987654	0.0625	0.25	0.369565
solcap_snp_sl_49428	2	38.8368	0	0.0181818	0	0.153846	0	0	0.5	0	0	0.0327869	0
solcap_snp_sl_18401	2	38.8572	0.0882353	0.266667	0.636364	0.538462	0.875	0.536585	0	0.0987654	0.0625	0.216667	0.333333
CL017742-0462	2	38.8915	0	0.0272727	0.0333333	0.32	0.166667	0.25	0.9375	0	0	0.0327869	0.0204082
CL015542-0573	2	38.898	0	0.0272727	0	0.24	0	0.102564	0.933333	0	0	0.0327869	0.0204082
CL015292-0316	2	38.9264	0	0	0	0	0	0	0	0	0	0	0
solcap_snp_sl_49458	2	39.1449	0	0.0272727	0	0.2	0.166667	0.153846	0.933333	0	0	0.0327869	0.0204082
SGN-U582680_snp71245	2	39.1776	0	0	0	0.037037	0	0.0952381	0	0	0	0	0
solcap_snp_sl_18419	2	39.2753	0.0507246	0.811321	0.637931	0.68	0.444444	0.564103	0.785714	0.0365854	0.06	0.864407	0.744681
solcap_snp_sl_18420	2	39.2754	0.057554	0.811321	0.637931	0.68	0.4	0.564103	0.785714	0.0365854	0.0784314	0.864407	0.744681
solcap_snp_sl_49480	2	39.278	0	0.00917431	0	0.16	0	0	0.461538	0	0	0.0163934	0
solcap_snp_sl_18421	2	39.2834	0.0507246	0.785047	0.631579	0.37037	0.444444	0.55	0	0.0365854	0.06	0.830508	0.729167
solcap_snp_sl_49490	2	39.3096	0	0.0272727	0	0.291667	0.0909091	0.236842	0.9375	0	0	0.0327869	0.0204082
SGN-U313245_T0562_snp547	2	39.3261	0	0.0183486	0	0.28	0	0	0.785714	0	0	0.0327869	0
solcap_snp_sl_49497	2	39.3371	0	0.0183486	0	0.24	0	0.0243902	0.785714	0	0	0.0327869	0
solcap_snp_sl_49500	2	39.3391	0	0.0183486	0	0.24	0	0.0243902	0.785714	0	0	0.0327869	0
solcap_snp_sl_49505	2	39.3506	0	0.0183486	0	0.230769	0	0.0243902	0.785714	0	0	0.0327869	0
SGN-U574334_snp341_solcap_snp_sl_49507	2	39.3699	0	0.0183486	0	0.28	0	0.1	0.866667	0	0	0.0327869	0
solcap_snp_sl_49517	2	39.5245	0	0	0	0.0769231	0	0.0697674	0.0625	0	0	0	0
solcap_snp_sl_49535	2	39.6498	0	0.0272727	0	0.25	0	0.175	0.9375	0	0	0.0327869	0.0204082
CL017734-0752	2	39.7332	0	0.00909091	0	0	0	0	0	0	0	0.0163934	0
SGN-U315352_snp103	2	39.8089	0	0.0272727	0	0.230769	0.0833333	0.205128	0.75	0	0	0.0327869	0.0204082
CL017181-0258	2	39.8909	0	0.00909091	0	0	0	0	0	0	0	0.0163934	0
solcap_snp_sl_18441	2	39.8909	0.0567376	0.113208	0.172414	0.111111	0.272727	0.179487	0	0.0731707	0.0384615	0.0847458	0.148936
solcap_snp_sl_18443	2	39.892	0.05	0.122642	0.169492	0.111111	0.272727	0.179487	0	0.0617284	0.0384615	0.101695	0.148936
solcap_snp_sl_18444	2	39.8921	0.05	0.102804	0.169492	0.111111	0.166667	0.146341	0	0.0617284	0.0384615	0.0833333	0.12766
solcap_snp_sl_18445	2	39.8929	0.05	0.104762	0.155172	0.111111	0.2	0.175	0	0.0617284	0.0384615	0.0689655	0.148936
solcap_snp_sl_49576	2	39.8952	0.05	0.142857	0.169492	0.384615	0.181818	0.230769	0.9375	0.0617284	0.0384615	0.135593	0.152174
solcap_snp_sl_18447	2	39.9011	0.0567376	0.103774	0.169492	0.111111	0.181818	0.146341	0	0.0731707	0.0384615	0.0847458	0.12766
solcap_snp_sl_18448	2	39.9014	0.05	0.0943396	0.155172	0.111111	0.1	0.146341	0	0.0617284	0.0384615	0.0677966	0.12766
solcap_snp_sl_18449	2	39.9043	0.05	0.11215	0.169492	0.111111	0.181818	0.146341	0	0.0617284	0.0384615	0.1	0.12766
solcap_snp_sl_18450	2	39.9044	0.05	0.0943396	0.155172	0.111111	0.1	0.146341	0	0.0617284	0.0384615	0.0677966	0.12766
solcap_snp_sl_18451	2	39.9072	0.05	0.104762	0.155172	0.111111	0.1	0.175	0	0.0617284	0.0384615	0.0689655	0.148936
solcap_snp_sl_18452	2	39.9075	0.05	0.104762	0.140351	0.115385	0.1	0.175	0	0.0617284	0.0384615	0.0689655	0.148936
solcap_snp_sl_18453	2	39.9075	0.05	0.134615	0.125	0.333333	0.1	0.230769	0.9375	0.0617284	0.0384615	0.12069	0.152174
solcap_snp_sl_18455	2	39.908	0.05	0.104762	0.140351	0.111111	0.0909091	0.170732	0	0.0617284	0.0384615	0.0689655	0.148936
solcap_snp_sl_49579	2	39.9168	0	0.037037	0	0.269231	0	0.225	0.933333	0	0	0.05	0.0208333
SGN-U580456_snp788_solcap_snp_sl_49586	2	39.9844	0	0.00909091	0	0.0740741	0	0	0.125	0	0	0.0163934	0
SGN-U575324_snp56571	2	40.0167	0	0.0275229	0	0.208333	0	0	0.909091	0	0	0.0491803	0
SGN-U575324_snp57048	2	40.0172	0	0.0275229	0	0.269231	0	0.225	0.9375	0	0	0.0491803	0
SGN-U575324_snp58160	2	40.0183	0	0.00917431	0	0.153846	0	0.097561	0.375	0	0	0.0163934	0
SGN-U575324_snp58163	2	40.0183	0	0.00917431	0	0.153846	0	0.0952381	0.375	0	0	0.0163934	0
solcap_snp_sl_49606	2	40.0933	0.140741	0.895238	0.684211	0.36	1	0.435897	0	0.1375	0.145833	0.901639	0.886364
CL009173-0541	2	40.0963	0	0.0275229	0	0.28	0	0.230769	0.9375	0	0	0.0491803	0
DOT_468	2	40.1207	0	0.00909091	0	0.12	0	0	0.428571	0	0	0.0163934	0
solcap_snp_sl_49613	2	40.1246	0	0.0183486	0	0.269231	0	0.105263	0.857143	0	0	0.0327869	0
solcap_snp_sl_49645	2	40.2708	0	0.0366972	0	0.24	0	0.205128	0.9375	0	0	0.0491803	0.0208333
CL016050-0434	2	40.2925	0	0.0366972	0	0.230769	0.166667	0.27027	0.933333	0	0	0.0491803	0.0208333
SGN-U586140_snp1218_solcap_snp_sl_49661	2	40.3311	0	0.0183486	0	0.230769	0	0	0.6	0	0	0.0327869	0
solcap_snp_sl_49664	2	40.3324	0	0.0363636	0	0.222222	0	0.157895	0.933333	0	0	0.0327869	0.0408163
solcap_snp_sl_23909	2	40.3392	0.865672	0.0366972	0.22807	0.32	0.1	0.142857	0	0.8625	0.87234	0	0.0833333
solcap_snp_sl_49669	2	40.381	0	0.0275229	0	0.296296	0	0.128205	0.933333	0	0	0.0327869	0.0208333
CL015261-0333	2	40.4076	0	0.00909091	0	0	0	0	0	0	0	0	0.0204082
CL015261-0146	2	40.4078	0	0.0181818	0	0.222222	0	0	0.266667	0	0	0.0327869	0
solcap_snp_sl_49679	2	40.4224	0	0.0363636	0	0.296296	0	0.189189	0.9375	0	0	0.0327869	0.0408163
CL016002-0147	2	40.4565	0	0	0	0.037037	0	0	0	0	0	0	0
solcap_snp_sl_29869	2	40.4569	0	0	0	0.0384615	0.363636	0.121951	0	0	0	0	0
solcap_snp_sl_49726	2	40.5708	0	0.0363636	0	0.307692	0	0.162162	0.933333	0	0	0.0327869	0.0408163
CL015741-0547	2	40.6164	0	0.0275229	0	0.259259	0	0	0.75	0	0	0.0327869	0.0208333
CL015119-0265_solcap_snp_sl_49752	2	40.7551	0.0283688	0.0363636	0	0.384615	0	0.105263	0.769231	0.0487805	0	0.0327869	0.0408163
CL016571-0142	2	40.7809	0	0.00909091	0	0	0	0	0	0	0	0	0.0204082
solcap_snp_sl_49767	2	40.815	0.035461	0.0181818	0	0.208333	0	0	0.785714	0.0609756	0	0.0327869	0
solcap_snp_sl_49786	2	40.9558	0.0357143	0.0272727	0	0.2	0	0.1	0.666667	0.0487805	0.0196078	0.0327869	0.0204082
SGN-U584914_snp1830	2	41.0223	0.0425532	0.0363636	0	0.291667	0	0.153846	0.9375	0.0487805	0.0384615	0.0327869	0.0408163
CL015133-0476	2	41.0511	0	0.00909091	0	0.04	0	0	0.1875	0	0	0	0.0204082
solcap_snp_sl_49803	2	41.0568	0.0357143	0.0363636	0	0.217391	0	0.153846	0.933333	0.0487805	0.0196078	0.0327869	0.0408163
CL017414-0044	2	41.2156	0	0.00909091	0	0	0	0	0	0	0	0	0.0204082
CL017414-0128	2	41.2157	0.05	0.0183486	0	0.115385	0	0	0.375	0.0617284	0.0384615	0.0327869	0
solcap_snp_sl_29887	2	41.3057	0.0141844	0	0.0357143	0.0769231	0.0909091	0.0697674	0	0.0121951	0.0192308	0	0
solcap_snp_sl_29891	2	41.3418	0.0507246	0.037037	0.0925926	0.375	0.0909091	0.487179	0.9375	0.0625	0.0392157	0.0327869	0.0425532
solcap_snp_sl_23925	2	41.3456	0	0	0.0740741	0.185185	0.0909091	0.333333	0	0	0	0	0
SGN-U576591_snp67938	2	41.361	0.0437956	0.0363636	0	0.0869565	0	0.105263	0.866667	0.0625	0.02	0.0327869	0.0408163
SGN-U576591_snp65026	2	41.3639	0.057554	0.0272727	0	0.12	0	0.105263	0.866667	0.0740741	0.0392157	0.0327869	0.0204082
SGN-U586520_snp61264	2	41.3677	0.0496454	0.0183486	0	0.12	0	0.0263158	0.4	0.0609756	0.0384615	0.0327869	0
SGN-U586520_snp61163	2	41.3678	0.0434783	0.0363636	0	0.166667	0	0.105263	0.875	0.0617284	0.02	0.0327869	0.0408163
SGN-U586520_snp60358	2	41.3686	0.0434783	0.0272727	0	0.16	0	0.105263	0.875	0.0617284	0.02	0.0327869	0.0204082
CL016721-0530	2	41.3861	0	0.00909091	0	0	0	0	0	0	0	0	0.0204082
solcap_snp_sl_49909	2	41.4452	0.0357143	0.00909091	0	0.037037	0	0.047619	0.1875	0.0487805	0.0196078	0.0163934	0
CL015604-0460	2	41.4804	0	0.00909091	0	0	0	0	0	0	0	0	0.0204082
SGN-U581579_snp1167_solcap_snp_sl_49921	2	41.511	0.0428571	0.0181818	0	0.111111	0	0	0.125	0.0609756	0.0196078	0.0327869	0
solcap_snp_sl_49928	2	41.5485	0.0428571	0.0181818	0	0.0740741	0	0	0.125	0.0609756	0.0196078	0.0327869	0
SL10390_312	2	41.592	0.057971	0.0272727	0	0.2	0	0.282051	0.9375	0.0864198	0.02	0.0327869	0.0204082
CL000175-0403	2	41.5923	0.00719424	0.00909091	0	0.08	0	0.179487	0.571429	0.0123457	0	0	0.0204082
solcap_snp_sl_49964	2	41.7005	0.0362319	0.0181818	0	0.12	0	0.0731707	0.642857	0.0493827	0.02	0.0163934	0.0204082
solcap_snp_sl_49965	2	41.7014	0.0428571	0.0277778	0	0.130435	0	0.195122	0.571429	0.0609756	0.0196078	0.0327869	0.0212766
solcap_snp_sl_4829	2	41.726	0.00719424	0.833333	0.698113	0.333333	1	0.475	0	0	0	0.916667	0.729167
SGN-U589573_snp49325	2	41.7682	0.0434783	0.0366972	0	0.16	0	0.210526	0.9375	0.0617284	0.02	0.0327869	0.0416667
solcap_snp_sl_18519	2	41.7824	0.00719424	0.0925926	0.206897	0.208333	0.428571	0.317073	0	0.0123457	0	0.0666667	0.125
SGN-U576696_snp60390_solcap_snp_sl_49988	2	41.7962	0.0144928	0.0183486	0	0.12	0	0.153846	0.733333	0.025	0	0.0163934	0.0208333
solcap_snp_sl_4831	2	41.7962	0.0503597	0.842593	0.78	0.304348	1	0.365854	0	0.037037	0.0588235	0.933333	0.729167
SGN-U576696_snp60503_solcap_snp_sl_49989	2	41.7963	0.0144928	0.00925926	0	0.12	0	0.153846	0.733333	0.025	0	0.0163934	0
SGN-U576696_snp60922_solcap_snp_sl_49990	2	41.7967	0.0143885	0.00925926	0	0.12	0	0.153846	0.846154	0.0246914	0	0.0163934	0
SGN-U576696_snp63171	2	41.7989	0.0143885	0.00925926	0	0.12	0	0.153846	0.714286	0.0246914	0	0.0163934	0
solcap_snp_sl_49992	2	41.7991	0.0142857	0.0185185	0	0.125	0	0.153846	0.714286	0.0246914	0	0.0163934	0.0212766
SGN-U576696_snp63412	2	41.7992	0.0143885	0.0185185	0	0.125	0	0.153846	0.714286	0.0246914	0	0.0163934	0.0212766
solcap_snp_sl_49996	2	41.8293	0	0	0	0.037037	0	0	0.133333	0	0	0	0
solcap_snp_sl_50004	2	42.0619	0	0.00925926	0	0.115385	0	0	0.4	0	0	0.0163934	0
solcap_snp_sl_4842	2	42.0837	0.00714286	0.724771	0.45614	0.115385	0.454545	0	0	0	0	0.833333	0.591837
CL015008-0195	2	42.0985	0	0.0275229	0.0163934	0.115385	0	0.179487	0.9375	0	0	0.0163934	0.0416667
solcap_snp_sl_50012	2	42.1225	0	0.00925926	0.0163934	0.037037	0	0	0.0625	0	0	0.0163934	0
solcap_snp_sl_17161	2	42.1907	0.0666667	0.141509	0.230769	0.478261	0.555556	0.804878	0.9375	0.0886076	0.0408163	0.1	0.195652
solcap_snp_sl_42699	2	42.1908	0	0.00917431	0.0163934	0.0384615	0	0	0.125	0	0	0.0163934	0
CL017838-0265	2	42.2259	0	0.0275229	0.0163934	0.125	0	0.179487	0.933333	0	0	0.0163934	0.0416667
solcap_snp_sl_42692	2	42.2288	0	0.0275229	0	0	0	0.15	0.533333	0	0	0.0163934	0.0416667
SGN-U568929_snp230_solcap_snp_sl_42681	2	42.295	0	0.0275229	0.0163934	0.12	0	0.179487	0.866667	0	0	0.0163934	0.0416667
solcap_snp_sl_42678	2	42.3337	0	0.00917431	0.0163934	0.0769231	0	0.0243902	0.4375	0	0	0.0163934	0
SGN-U571023_snp534	2	42.4237	0	0.0185185	0	0.08	0	0	0.785714	0	0	0.0163934	0.0212766
solcap_snp_sl_42639	2	42.535	0	0.00917431	0.0163934	0.037037	0	0	0.3125	0	0	0.0163934	0
CL017245-0136	2	42.5729	0	0.0183486	0.0163934	0.0384615	0	0	0.214286	0	0	0.0163934	0.0208333
solcap_snp_sl_42625	2	42.632	0	0.0185185	0	0.12	0	0.0487805	0.714286	0	0	0.0163934	0.0212766
SGN-U320705_snp63	2	42.6513	0.00714286	0.0183486	0.0169492	0.08	0	0.025	0.75	0.0121951	0	0.0163934	0.0208333
SGN-U316197_C2_At4g36530_snp168	2	42.6731	0.00714286	0.00925926	0.0163934	0.0740741	0	0	0.733333	0.0121951	0	0.0163934	0
SGN-U568700_snp42664	2	42.7193	0	0.0185185	0.0163934	0.12	0	0.131579	0.9375	0	0	0.0163934	0.0212766
SGN-U568700_snp42655	2	42.7193	0	0.0185185	0	0.111111	0	0.131579	0.9375	0	0	0.0163934	0.0212766
SGN-U568700_snp42142	2	42.7198	0	0	0	0	0	0.1	0.125	0	0	0	0
CL016442-0175	2	42.739	0	0.00909091	0	0	0	0	0	0	0	0	0.0204082
CL015100-0473	2	42.9653	0.00714286	0.0275229	0.0166667	0.16	0	0.205128	0.9375	0.0121951	0	0.0163934	0.0416667
solcap_snp_sl_42537	2	42.9812	0	0.0185185	0	0.115385	0	0.128205	0.866667	0	0	0.0163934	0.0212766
solcap_snp_sl_42518	2	43.0688	0	0.00909091	0	0.0769231	0	0.157895	0.75	0	0	0	0.0204082
SGN-U602949_snp105683	2	43.1245	0.00719424	0.0275229	0	0.208333	0.3	0.205128	0.9375	0	0.0196078	0.0163934	0.0416667
CT232_snp229	2	43.2077	0.00719424	0.0185185	0.0163934	0.2	0.3	0.0731707	0.666667	0	0.0196078	0.0163934	0.0212766
SGN-U316347_T1535_snp219_solcap_snp_sl_42471	2	43.23	0	0.0183486	0	0.185185	0	0.047619	0.214286	0	0	0.0163934	0.0208333
solcap_snp_sl_17138	2	43.2692	0	0.00909091	0.0163934	0	0	0	0	0	0	0	0.0204082
solcap_snp_sl_42464	2	43.425	0.00724638	0.0185185	0	0.16	0.1	0.1	0.846154	0	0.0196078	0.0163934	0.0212766
solcap_snp_sl_42463	2	43.4448	0.00724638	0.0275229	0	0.208333	0.1	0.131579	0.928571	0	0.0196078	0.0163934	0.0416667
solcap_snp_sl_42458	2	43.4962	0.0142857	0.0275229	0.0163934	0.2	0	0.0810811	0.846154	0	0.0196078	0.0163934	0.0416667
SGN-U318040_U146494_snp347_solcap_snp_sl_42453	2	43.5266	0.0291971	0.0366972	0	0.166667	0	0.0540541	0.866667	0.0246914	0.04	0.0327869	0.0416667
CL016862-0447_solcap_snp_sl_42441	2	43.5746	0.0359712	0.0275229	0.0163934	0.185185	0	0.0810811	0.866667	0.0246914	0.0588235	0.0327869	0.0208333
CL016862-0381	2	43.5746	0	0.00909091	0	0	0	0	0	0	0	0	0.0204082
solcap_snp_sl_42411	2	43.7044	0.00714286	0.0366972	0.0163934	0.2	0	0.131579	0.9375	0	0.0196078	0.0327869	0.0416667
solcap_snp_sl_12841	2	43.8018	0.560606	0.841121	0.275862	0.192308	0.1	0	0	0.5	0.638298	0.866667	0.808511
solcap_snp_sl_42383	2	43.8355	0.0070922	0.0275229	0	0.111111	0	0.0512821	0.571429	0	0.0192308	0.0327869	0.0208333
solcap_snp_sl_42346	2	43.9781	0.0070922	0.037037	0.0163934	0.166667	0	0.166667	0.9375	0	0.0192308	0.0327869	0.0425532
solcap_snp_sl_42334	2	44.0183	0.0070922	0.0183486	0	0.08	0	0	0.333333	0	0.0192308	0.0327869	0
SGN-U579280_snp65613	2	44.0632	0	0.0185185	0	0.08	0	0.075	0.133333	0	0	0.0327869	0
SGN-U579280_snp65625	2	44.0632	0	0.0185185	0	0.08	0	0.075	0.133333	0	0	0.0327869	0
SGN-U590370_snp65805	2	44.0634	0	0.037037	0	0.12	0	0.102564	0.384615	0	0	0.0327869	0.0425532
SGN-U590370_snp65811	2	44.0634	0	0.0275229	0	0.115385	0	0.102564	0.384615	0	0	0.0327869	0.0208333
SGN-U590370_snp65846	2	44.0634	0	0.037037	0	0.125	0	0.102564	0.384615	0	0	0.0327869	0.0425532
SGN-U590370_snp65887	2	44.0634	0	0.037037	0	0.12	0	0.102564	0.384615	0	0	0.0327869	0.0425532
SGN-U579752_snp292_solcap_snp_sl_42324	2	44.0694	0.0070922	0.037037	0.0166667	0.208333	0	0.324324	0.9375	0	0.0192308	0.0327869	0.0425532
CL015021-0454	2	44.0729	0.0070922	0.037037	0	0.0869565	0	0.102564	0.384615	0	0.0192308	0.0327869	0.0425532
solcap_snp_sl_42301	2	44.2213	0.0070922	0.0183486	0.0163934	0.115385	0	0	0.428571	0	0.0192308	0.0327869	0
solcap_snp_sl_50166	2	44.3026	0.0070922	0.0280374	0	0.0869565	0	0.0243902	0.785714	0	0.0192308	0.0327869	0.0217391
CL015559-0344	2	44.3521	0.0070922	0.0280374	0.0163934	0.125	0	0.0243902	0.692308	0	0.0192308	0.0327869	0.0217391
solcap_snp_sl_29920	2	44.4333	0.0070922	0.0373832	0.0172414	0.25	0.111111	0.6	1	0	0.0192308	0.0327869	0.0434783
solcap_snp_sl_50126	2	44.5246	0.0070922	0.0272727	0	0.16	0	0.108108	0.866667	0	0.0192308	0.0327869	0.0204082
solcap_snp_sl_29918	2	44.6014	0	0	0.0163934	0.037037	0	0.190476	0	0	0	0	0
CL015139-0364	2	44.6094	0.00719424	0	0	0.0909091	0	0	0.333333	0	0.02	0	0
SGN-U572314_snp1007_solcap_snp_sl_29914	2	44.6544	0.0142857	0.037037	0.0327869	0.25	0	0.368421	0.9375	0	0.0392157	0.0327869	0.0425532
solcap_snp_sl_50066	2	44.7837	0.0142857	0.0183486	0.0163934	0.115385	0.3	0	0.785714	0	0.0392157	0.0327869	0
solcap_snp_sl_50060	2	44.8099	0.0142857	0.0366972	0	0.130435	0.3	0.135135	0.9375	0	0.0392157	0.0327869	0.0416667
solcap_snp_sl_50058	2	44.8137	0.0142857	0.0366972	0.0163934	0.166667	0.3	0.105263	0.9375	0	0.0392157	0.0327869	0.0416667
solcap_snp_sl_29911	2	44.8143	0	0	0	0	0	0.186047	0	0	0	0	0
solcap_snp_sl_50055	2	44.8383	0.0142857	0.0272727	0	0.153846	0.3	0.105263	0.692308	0	0.0392157	0.0327869	0.0204082
solcap_snp_sl_29905	2	45.023	0	0.00909091	0.0163934	0	0	0.0232558	0	0	0	0	0.0204082
CL009217-0844	2	45.0535	0	0.00917431	0	0	0	0	0	0	0	0	0.0208333
SL10924_758_CL009217-0735	2	45.0536	0	0.119266	0.118644	0.037037	0	0	0	0	0	0.05	0.204082
solcap_snp_sl_50024	2	45.0675	0.0212766	0.0183486	0.0163934	0.185185	0	0.0540541	0.642857	0	0.0576923	0.0327869	0
solcap_snp_sl_36297	2	45.1443	0.0142857	0.0458716	0.0677966	0.269231	0	0.394737	0.9375	0	0.0392157	0.0327869	0.0625
solcap_snp_sl_36294	2	45.2182	0	0.00909091	0.0163934	0.111111	0	0.119048	0.0625	0	0	0	0.0204082
solcap_snp_sl_67389	2	45.3108	0.00714286	0	0	0.0384615	0	0	0.2	0	0.0196078	0	0
solcap_snp_sl_67361	2	45.4883	0.0142857	0.00917431	0	0.16	0	0.0243902	0.642857	0	0.0392157	0.0163934	0
solcap_snp_sl_36287	2	45.5437	0.0142857	0.046729	0	0.2	0	0.285714	0.533333	0	0.0392157	0.05	0.0425532
SGN-U584284_snp3414	2	45.5821	0	0	0	0.037037	0	0.102564	0	0	0	0	0
solcap_snp_sl_10796	2	45.6725	0.0141844	0.17757	0.220339	0.04	0	0.0232558	0	0.0243902	0	0.224138	0.122449
solcap_snp_sl_67311	2	45.7099	0.0142857	0.0181818	0	0.115385	0	0	0.714286	0	0.0392157	0.0163934	0.0204082
SGN-U569505_snp29744	2	45.7503	0	0	0	0.037037	0	0.108108	0.2	0	0	0	0
solcap_snp_sl_36273	2	45.8935	0.0142857	0.0183486	0	0.269231	0	0.578947	1	0	0.0392157	0.0163934	0.0208333
solcap_snp_sl_36271	2	45.9439	0	0	0.0163934	0	0	0.0465116	0	0	0	0	0
solcap_snp_sl_67234	2	45.9464	0.0212766	0.00909091	0.0163934	0.0384615	0	0	0.133333	0	0.0576923	0.0163934	0
solcap_snp_sl_36265	2	45.9718	0	0	0.0163934	0.148148	0	0.175	0.125	0	0	0	0
solcap_snp_sl_36264	2	45.9917	0	0	0.0163934	0.185185	0.0833333	0.225	0.0625	0	0	0	0
solcap_snp_sl_67198	2	46.0863	0.00714286	0.00917431	0	0.0384615	0	0	0.375	0	0.0196078	0.0163934	0
solcap_snp_sl_67184	2	46.2047	0.00714286	0.0181818	0	0.0384615	0	0	0.125	0	0.0196078	0.0327869	0
solcap_snp_sl_67183	2	46.2057	0.00714286	0.0275229	0	0.0769231	0	0	0.785714	0	0.0196078	0.0327869	0.0208333
solcap_snp_sl_36259	2	46.2283	0	0	0.0327869	0.185185	0	0.238095	0.0625	0	0	0	0
solcap_snp_sl_36258	2	46.2759	0	0	0.0327869	0.0740741	0	0.162791	0.0625	0	0	0	0
solcap_snp_sl_67138	2	46.43	0	0.0363636	0	0.0740741	0	0.138889	0.692308	0	0	0.0327869	0.0408163
solcap_snp_sl_36253	2	46.4434	0	0	0.0491803	0.185185	0	0.243902	0.0625	0	0	0	0
solcap_snp_sl_67119	2	46.497	0	0.0183486	0	0.16	0	0.0833333	0.6	0	0	0.0327869	0
solcap_snp_sl_67117	2	46.4975	0	0.0272727	0	0.16	0	0.0833333	0.733333	0	0	0.0327869	0.0204082
solcap_snp_sl_36245	2	46.5194	0	0	0.0327869	0	0	0.0697674	0	0	0	0	0
solcap_snp_sl_36243	2	46.5255	0	0	0.0333333	0	0	0.0697674	0	0	0	0	0
solcap_snp_sl_10759	2	46.5692	0.00714286	0.181818	0.237288	0.153846	0.2	0.170732	0	0.0121951	0	0.147541	0.22449
CL017630-0504	2	46.5694	0	0.00909091	0	0	0	0	0	0	0	0	0.0204082
solcap_snp_sl_36241	2	46.5879	0	0.0183486	0.0169492	0.037037	0	0.166667	0	0	0	0.0166667	0.0204082
solcap_snp_sl_36238	2	46.6291	0	0	0	0.111111	0.0833333	0.162791	0	0	0	0	0
solcap_snp_sl_67090	2	46.6428	0	0.0183486	0	0.153846	0	0.0487805	0.357143	0	0	0.0327869	0
fw2.2_283_b	2	46.8302	0	0.0272727	0	0.148148	0.0833333	0.116279	0.133333	0	0	0.0327869	0.0204082
CL017715-0231	2	46.8554	0	0	0	0	0	0	0	0	0	0	0
CL017715-0287_solcap_snp_sl_67052	2	46.8555	0	0.0181818	0	0.153846	0	0.0789474	0.714286	0	0	0.0163934	0.0204082
solcap_snp_sl_36232	2	46.8566	0	0.0181818	0	0.333333	0.166667	0.5	1	0	0	0.0163934	0.0204082
solcap_snp_sl_36231	2	46.8803	0	0	0	0.0740741	0	0.166667	0.0625	0	0	0	0
ABA1_2029_solcap_snp_sl_67036	2	46.9479	0	0.0181818	0	0.115385	0	0.0833333	0.692308	0	0	0.0163934	0.0204082
ABA1_Promoter_SNP2_solcap_snp_sl_67034	2	46.9525	0	0.0181818	0	0.185185	0	0.166667	0.785714	0	0	0.0163934	0.0204082
solcap_snp_sl_67032	2	46.9531	0	0.0181818	0	0.115385	0	0.0833333	0.692308	0	0	0.0163934	0.0204082
ABA1_Promoter_SNP1	2	46.9532	0	0.0181818	0.0166667	0.333333	0.0833333	0.473684	1	0	0	0.0163934	0.0204082
solcap_snp_sl_36224	2	46.9949	0.0141844	0.103774	0.339623	0.478261	0.875	0.769231	1	0	0.0384615	0.0701754	0.142857
CL017806-0320_solcap_snp_sl_67017	2	47.0268	0	0.0181818	0	0.153846	0	0.0810811	0.769231	0	0	0.0163934	0.0204082
solcap_snp_sl_67010	2	47.0958	0	0.0181818	0	0.153846	0	0.108108	0.857143	0	0	0.0163934	0.0204082
solcap_snp_sl_36221	2	47.1969	0	0.00917431	0.0338983	0.269231	0.272727	0.421053	0.9375	0	0	0	0.0208333
solcap_snp_sl_36220	2	47.2917	0	0	0	0.037037	0	0.0697674	0	0	0	0	0
solcap_snp_sl_66965	2	47.3446	0	0	0	0.0769231	0	0	0.733333	0	0	0	0
solcap_snp_sl_66955	2	47.3617	0	0	0	0.153846	0	0.0769231	0.8125	0	0	0	0
solcap_snp_sl_66953	2	47.3648	0	0	0	0.153846	0	0.0769231	0.8125	0	0	0	0
solcap_snp_sl_66951	2	47.3661	0	0	0	0.148148	0	0.075	0.8	0	0	0	0
solcap_snp_sl_36203	2	47.4871	0	0	0	0	0	0.0232558	0	0	0	0	0
solcap_snp_sl_36202	2	47.6514	0	0.00917431	0.0350877	0.32	0.363636	0.410256	0.9375	0	0	0	0.0208333
solcap_snp_sl_36201	2	47.6527	0	0	0	0	0	0.0930233	0	0	0	0	0
solcap_snp_sl_66904	2	47.6832	0	0	0	0.12	0.181818	0.0526316	0.9375	0	0	0	0
solcap_snp_sl_66878	2	47.7869	0	0.00917431	0	0.153846	0.181818	0.0526316	0.9375	0	0	0	0.0208333
solcap_snp_sl_21867	2	47.9489	0.0431655	0.357798	0.35	0.423077	0.363636	0.447368	0.857143	0.0740741	0	0.377049	0.333333
solcap_snp_sl_21866	2	47.9501	0.0431655	0.361111	0.290909	0.518519	0.444444	0.473684	1	0.0740741	0	0.393443	0.319149
solcap_snp_sl_36193	2	47.9719	0.0428571	0.183908	0.211538	0.227273	0.222222	0.357143	0.466667	0.0731707	0	0.139535	0.227273
solcap_snp_sl_36192	2	47.9719	0.0425532	0.348624	0.25	0.333333	0.363636	0.380952	0.538462	0.0731707	0	0.393443	0.291667
solcap_snp_sl_21864	2	47.978	0.0431655	0.354545	0.333333	0.24	0.363636	0.384615	0.0666667	0.0740741	0	0.393443	0.306122
solcap_snp_sl_21862	2	47.9815	0.0431655	0.357798	0.333333	0.423077	0.363636	0.447368	1	0.0740741	0	0.393443	0.3125
solcap_snp_sl_36189	2	47.9964	0	0	0.0491803	0.307692	0.2	0.307692	1	0	0	0	0
solcap_snp_sl_36188	2	48.0287	0	0.00917431	0.0655738	0.384615	0.2	0.35	1	0	0	0	0.0208333
CL016371-0420	2	48.1769	0	0	0	0	0	0	0	0	0	0	0
solcap_snp_sl_67596	2	48.2051	0	0	0	0.111111	0	0	0.266667	0	0	0	0
SGN-U315914_C2_At5g67370_snp371	2	48.2728	0	0	0	0	0	0	0	0	0	0	0
solcap_snp_sl_21971	2	48.3053	0.0567376	0.474747	0.637931	0.681818	0.777778	0.9	1	0.0853659	0.0192308	0.482143	0.465116
solcap_snp_sl_21966	2	48.3708	0.0496454	0.0740741	0.471698	0.590909	0.666667	0.738095	1	0.0731707	0.0192308	0.0327869	0.12766
solcap_snp_sl_67551	2	48.3952	0	0.00917431	0	0.173913	0.2	0.15	0.9375	0	0	0.0163934	0
solcap_snp_sl_58490	2	48.444	0	0.00917431	0	0.173913	0.2	0.179487	0.9375	0	0	0.0163934	0
solcap_snp_sl_20064	2	48.4548	0.0425532	0.0366972	0.0847458	0	0.0833333	0	0	0.0731707	0	0.0163934	0.0625
solcap_snp_sl_20063	2	48.4551	0.0425532	0.0555556	0.166667	0.454545	0.6	0.675	1	0.0731707	0	0.0327869	0.0851064
solcap_snp_sl_32404	2	48.5121	0	0	0	0	0	0.0930233	0	0	0	0	0
solcap_snp_sl_58462	2	48.5474	0	0	0	0.111111	0	0.0731707	0.733333	0	0	0	0
solcap_snp_sl_58447	2	48.6022	0.511811	0.471154	0.673913	0.347826	0.25	0.121951	0	0.554054	0.434783	0.448276	0.5
solcap_snp_sl_20052	2	48.685	0.155556	0.509434	0.313725	0.44	0.2	0.394737	0.9375	0.202532	0.0408163	0.533333	0.478261
CL017436-0294	2	48.6872	0.15942	0.504673	0.321429	0.153846	0	0.142857	0	0.197531	0.06	0.52459	0.478261
CL017436-0232	2	48.6873	0	0.00909091	0	0.0384615	0	0	0	0	0	0.0163934	0
solcap_snp_sl_20051	2	48.6965	0.155556	0.495238	0.28	0.166667	0	0.142857	0	0.202532	0.0408163	0.516667	0.466667
solcap_snp_sl_20049	2	48.6972	0.155556	0.518868	0.45098	0.666667	0.75	0.902439	1	0.202532	0.0408163	0.533333	0.5
solcap_snp_sl_58414	2	48.7283	0	0.00917431	0	0.217391	0.1	0.15	0.8	0	0	0.0163934	0
CL016576-0377	2	48.7319	0	0	0	0	0	0	0	0	0	0	0
solcap_snp_sl_58389	2	48.8326	0	0	0	0	0	0	0.0625	0	0	0	0
solcap_snp_sl_20044	2	48.8789	0.155556	0.518868	0.431373	0.565217	0.75	0.804878	0.9375	0.202532	0.0408163	0.533333	0.5
solcap_snp_sl_32389	2	48.9434	0	0.0183486	0.0727273	0.409091	0.777778	0.578947	1	0	0	0.0163934	0.0208333
CL016196-0121	2	49.0019	0	0.00917431	0	0.28	0.363636	0.15	0.9375	0	0	0.0163934	0
SGN-U313919_snp500	2	49.0156	0	0.00917431	0	0.28	0.363636	0.15	0.9375	0	0	0.0163934	0
solcap_snp_sl_48037	2	49.047	0	0.00917431	0	0.08	0.0833333	0.0487805	0.571429	0	0	0.0163934	0
solcap_snp_sl_29357	2	49.0895	0	0	0.0333333	0	0	0.0232558	0	0	0	0	0
solcap_snp_sl_48033	2	49.0924	0	0.00917431	0	0.125	0.363636	0.15	0.9375	0	0	0.0163934	0
solcap_snp_sl_29351	2	49.2413	0.0212766	0.0550459	0.172414	0.208333	0.5	0.459459	1	0.0121951	0.0384615	0.0491803	0.0625
solcap_snp_sl_47977	2	49.336	0	0.00917431	0	0.0833333	0.2	0.131579	0.9375	0	0	0.0163934	0
CL016534-0109	2	49.4235	0	0.00909091	0	0.0384615	0	0	0	0	0	0.0163934	0
solcap_snp_sl_29349	2	49.4516	0	0	0.0166667	0.08	0	0.205128	0.142857	0	0	0	0
solcap_snp_sl_47942	2	49.4524	0	0.00917431	0	0.12	0.181818	0.128205	0.9375	0	0	0.0163934	0
CL017391-0390	2	49.5633	0	0.00917431	0	0.04	0	0.0789474	0.857143	0	0	0.0163934	0
solcap_snp_sl_47897	2	49.6113	0	0.00917431	0	0.12	0.181818	0.128205	0.9375	0	0	0.0163934	0
solcap_snp_sl_47885	2	49.755	0	0	0	0	0	0.0243902	0.642857	0	0	0	0
solcap_snp_sl_47880	2	49.8162	0	0.00917431	0	0.04	0	0.0243902	0.642857	0	0	0.0163934	0
solcap_snp_sl_63048	3	0.071076	0.107143	0.037037	0	0.2	0.272727	0.097561	0.933333	0.123457	0.0384615	0.0166667	0.0625
CL016802-0675	3	0.119273	0.107143	0.00925926	0	0.153846	0	0.0487805	0.8	0.123457	0.0384615	0	0.0208333
solcap_snp_sl_63084	3	0.183363	0	0	0	0.111111	0	0	0.2	0	0	0	0
solcap_snp_sl_25015	3	0.304164	0.149254	0	0	0	0	0	0	0.1125	0.234043	0	0
CL017202-0450_solcap_snp_sl_63109	3	0.304215	0.1	0.00925926	0	0.16	0	0.05	0.8	0.111111	0.0384615	0	0.0208333
CL017080-0343	3	0.305385	0	0.0272727	0	0	0	0	0	0	0	0.0163934	0.0408163
CL017080-0223	3	0.305505	0.1	0.00925926	0	0.192308	0	0.05	0.8125	0.111111	0.0384615	0	0.0208333
solcap_snp_sl_63114	3	0.334009	0.0935252	0.037037	0	0.166667	0	0.05	0.8	0.1	0.0384615	0.0166667	0.0625
CL016925-0828	3	0.346009	0.1	0.00925926	0	0.192308	0	0.0232558	0.4	0.111111	0.0384615	0	0.0208333
solcap_snp_sl_63129	3	0.473207	0.0797101	0.00925926	0	0.115385	0	0	0.25	0.0759494	0.0384615	0	0.0208333
solcap_snp_sl_63134	3	0.473756	0.0797101	0.00925926	0	0.115385	0	0	0.25	0.0759494	0.0384615	0	0.0208333
solcap_snp_sl_34398	3	0.508484	0.0070922	0.0183486	0.0491803	0.0740741	0	0.214286	0	0	0.0192308	0	0.0416667
solcap_snp_sl_63167	3	0.631452	0.0857143	0.0185185	0	0.115385	0	0.0243902	0.666667	0.0864198	0.0384615	0	0.0416667
solcap_snp_sl_63184	3	0.748576	0	0.0185185	0	0.16	0.272727	0.162162	0.9375	0	0	0.0166667	0.0208333
solcap_snp_sl_9663	3	0.828684	0.377778	0.105769	0.222222	0.545455	0.5	0.846154	1	0.265823	0.530612	0.0508475	0.177778
solcap_snp_sl_63211	3	0.944995	0	0.00917431	0	0.115385	0.0833333	0	0.466667	0	0	0.0163934	0
solcap_snp_sl_21215	3	1.03447	0.0212766	0.0754717	0.210526	0.538462	0.625	0.675	1	0	0.0384615	0.05	0.108696
solcap_snp_sl_9666	3	1.04569	0.0212766	0.0666667	0.166667	0.4	0.125	0.538462	0.714286	0	0.0384615	0.05	0.0888889
solcap_snp_sl_9667	3	1.0459	0.0212766	0.0666667	0.166667	0.36	0.125	0.538462	0.714286	0	0.0384615	0.05	0.0888889
solcap_snp_sl_21216	3	1.05689	0.0212766	0.0666667	0.166667	0.52	0.571429	0.675	1	0	0.0384615	0.05	0.0888889
solcap_snp_sl_63240	3	1.14434	0	0.0275229	0	0.173913	0	0.1	0.875	0	0	0.0163934	0.0416667
solcap_snp_sl_9681	3	1.25756	0.151079	0.201923	0.314815	0.423077	0	0.410256	0.866667	0.1625	0.0576923	0.192982	0.212766
solcap_snp_sl_63273	3	1.32308	0	0	0	0.111111	0.0833333	0.025	0.6875	0	0	0	0
solcap_snp_sl_63285	3	1.38317	0	0	0	0.037037	0	0	0.428571	0	0	0	0
solcap_snp_sl_63290	3	1.39029	0	0.0275229	0	0.08	0.3	0.05	0.933333	0	0	0.0163934	0.0416667
solcap_snp_sl_63301	3	1.5293	0	0.00917431	0	0	0	0	0.5	0	0	0.0163934	0
CL016787-0272_solcap_snp_sl_63305	3	1.55432	0	0.0272727	0	0.153846	0.272727	0.15	0.9375	0	0	0	0.0612245
solcap_snp_sl_9683	3	1.58411	0.266667	0.0642202	0.298246	0.28	0.375	0.414634	0.266667	0.164557	0.44898	0	0.145833
solcap_snp_sl_63307	3	1.63195	0	0	0	0	0	0	0.75	0	0	0	0
SGN-U569291_snp1086	3	1.70429	0	0.0363636	0	0.08	0.272727	0.119048	0.666667	0	0	0.0163934	0.0612245
solcap_snp_sl_63356	3	1.87703	0	0.0272727	0	0.12	0.272727	0.128205	0.9375	0	0	0.0163934	0.0408163
CL017347-0198	3	1.89116	0	0.00909091	0	0	0	0	0	0	0	0.0163934	0
CL017347-0326_solcap_snp_sl_63360	3	1.89129	0	0	0	0.037037	0	0	0.428571	0	0	0	0
solcap_snp_sl_63377	3	1.9681	0	0	0	0	0	0	0.133333	0	0	0	0
solcap_snp_sl_9689	3	2.05301	0.148936	0.103774	0.473684	0.481481	0.888889	0.8	0.733333	0.0853659	0.25	0.0833333	0.130435
SL10790_382	3	2.05349	0.148936	0.037037	0.473684	0.384615	0.5	0.75	0.0625	0.0853659	0.25	0	0.0833333
solcap_snp_sl_15320	3	2.07258	0.148936	0.046729	0.45614	0.384615	0.454545	0.75	0.2	0.0853659	0.25	0	0.102041
solcap_snp_sl_9690	3	2.07309	0.148936	0.105769	0.5	0.52	0.888889	0.904762	1	0.0853659	0.25	0.0517241	0.173913
solcap_snp_sl_63391	3	2.0737	0.148936	0.0188679	0.340426	0.333333	0.454545	0.6875	0.0625	0.0853659	0.25	0	0.0434783
solcap_snp_sl_63402	3	2.11183	0	0.0272727	0	0.0416667	0	0.097561	0.8	0	0	0.0163934	0.0408163
CL017009-0461	3	2.14754	0	0.0363636	0	0.115385	0	0.125	0.857143	0	0	0.0327869	0.0408163
solcap_snp_sl_63452	3	2.36371	0	0	0	0	0	0	0.733333	0	0	0	0
solcap_snp_sl_9703	3	2.37214	0.459259	0.336449	0.563636	0.375	0.5	0.119048	0	0.303797	0.693878	0.25	0.446809
Ohase2_Promoter_SNP	3	2.44812	0	0	0	0	0	0	0.0625	0	0	0	0
solcap_snp_sl_63466	3	2.47232	0	0	0	0.0384615	0	0	0.266667	0	0	0	0
solcap_snp_sl_28569	3	2.50006	0.0070922	0.0183486	0	0.0769231	0.2	0.243902	0.9375	0.0121951	0	0.0327869	0
SGN-U571958_snp135	3	2.50012	0	0	0	0.0384615	0.0833333	0.225	0.0625	0	0	0	0
solcap_snp_sl_28572	3	3.32718	0.0070922	0.00925926	0	0.04	0.2	0.243902	0.9375	0.0121951	0	0.0166667	0
solcap_snp_sl_17581	3	3.32737	0	0.00934579	0.206897	0.0384615	0.1	0.0697674	0	0	0	0	0.0208333
solcap_snp_sl_28574	3	3.97129	0.0070922	0.0183486	0	0.0769231	0.2	0.243902	0.9375	0.0121951	0	0.0327869	0
solcap_snp_sl_28577	3	4.06934	0.0070922	0	0	0.0416667	0.222222	0.243902	0.9375	0.0121951	0	0	0
solcap_snp_sl_28580	3	5.67111	0.0070922	0	0	0.04	0.333333	0.243902	0.9375	0.0121951	0	0	0
solcap_snp_sl_19643	3	6.61272	0.537879	0.283019	0.309091	0.4	0.666667	0.725	1	0.43038	0.723404	0.101695	0.510638
solcap_snp_sl_55754	3	6.65935	0	0.0183486	0	0.08	0	0.230769	1	0	0	0.0327869	0
solcap_snp_sl_19652	3	6.72822	0.133333	0.00917431	0.0847458	0.0740741	0	0.121951	0	0.0617284	0.276596	0	0.0208333
solcap_snp_sl_24347	3	6.73618	0.133333	0.00917431	0.0847458	0.0740741	0	0.121951	0	0.0617284	0.276596	0	0.0208333
solcap_snp_sl_19654	3	6.76265	0.133333	0.0275229	0.0862069	0.153846	0	0.309524	0.933333	0.0617284	0.276596	0.0327869	0.0208333
SL10445_1141	3	6.80401	0.133333	0.00909091	0.0333333	0.0740741	0	0.097561	0	0.0617284	0.276596	0	0.0204082
solcap_snp_sl_19657	3	6.8067	0.132353	0.0275229	0.0338983	0.153846	0	0.292683	0.9375	0.0609756	0.276596	0.0327869	0.0208333
solcap_snp_sl_55790	3	6.80844	0	0.0181818	0	0.0740741	0	0.0243902	0.571429	0	0	0.0327869	0
solcap_snp_sl_19658	3	6.8191	0.132353	0.00909091	0.0333333	0.0740741	0	0.097561	0	0.0609756	0.276596	0	0.0204082
solcap_snp_sl_19659	3	6.8191	0.129496	0.00909091	0.0333333	0.0740741	0	0.097561	0	0.0609756	0.26	0	0.0204082
solcap_snp_sl_19660	3	6.87947	0.132353	0.00909091	0.0333333	0.0740741	0	0.097561	0	0.0609756	0.276596	0	0.0204082
solcap_snp_sl_55812	3	6.88758	0	0	0	0	0	0.1	0.714286	0	0	0	0
solcap_snp_sl_19661	3	6.90334	0.428571	0.192661	0.614035	0.576923	1	0.666667	0	0.333333	0.5625	0.0327869	0.395833
solcap_snp_sl_55125	3	6.97949	0	0	0	0.0384615	0	0.0243902	0.5	0	0	0	0
CL015582-0113	3	7.00763	0	0.0181818	0	0.0384615	0	0	0	0	0	0.0327869	0
solcap_snp_sl_14355	3	7.08513	0	0.25	0.0169492	0.230769	0.1	0.263158	1	0	0	0.333333	0.145833
solcap_snp_sl_14354	3	7.09557	0	0.222222	0.0169492	0.230769	0.1	0.263158	1	0	0	0.333333	0.0833333
solcap_snp_sl_14353	3	7.09586	0	0.222222	0.0169492	0.230769	0.1	0.263158	1	0	0	0.333333	0.0833333
solcap_snp_sl_55107	3	7.11524	0	0.0275229	0	0.153846	0.125	0.225	0.9375	0	0	0.0327869	0.0208333
CL015436-0159	3	7.11568	0	0.00917431	0	0.04	0.0909091	0.097561	0.214286	0	0	0	0.0208333
CL015436-0072	3	7.11577	0	0.00909091	0	0.0384615	0	0	0	0	0	0.0163934	0
solcap_snp_sl_55088	3	7.19616	0	0.0181818	0	0.0384615	0	0.146341	0.666667	0	0	0.0327869	0
solcap_snp_sl_55072	3	7.2319	0	0.0181818	0	0.0384615	0	0	0.375	0	0	0.0327869	0
solcap_snp_sl_55055	3	7.29371	0	0.0181818	0	0.115385	0	0.15	0.9375	0	0	0.0327869	0
solcap_snp_sl_55037	3	7.34138	0	0.0925926	0.0338983	0.481481	0.5	0.829268	1	0	0	0.114754	0.0638298
solcap_snp_sl_55026	3	7.41582	0	0.0181818	0	0.037037	0	0.0238095	0.5	0	0	0.0327869	0
SGN-U572737_snp86	3	7.47644	0	0.0462963	0.0169492	0.2	0.5	0.552632	0	0	0	0.0491803	0.0425532
SGN-U564013_snp1820_solcap_snp_sl_55020	3	7.51844	0	0.0925926	0.0169492	0.32	0.583333	0.785714	1	0	0	0.114754	0.0638298
solcap_snp_sl_55002	3	7.60432	0	0.0454545	0.0163934	0.16	0	0.2	0.8125	0	0	0.0655738	0.0204082
SGN-U567178_snp438_solcap_snp_sl_31828	3	7.71479	0.0141844	0.0181818	0	0.173913	0.0833333	0.275	1	0.0121951	0.0192308	0.0327869	0
solcap_snp_sl_31826	3	7.71739	0.0141844	0.0181818	0	0.2	0.0833333	0.282051	0.8125	0.0121951	0.0192308	0.0327869	0
solcap_snp_sl_31822	3	7.72435	0.0141844	0	0	0.0769231	0.0833333	0.142857	0.0666667	0.0121951	0.0192308	0	0
solcap_snp_sl_54950	3	7.89031	0	0.00909091	0	0.08	0	0.0465116	0.4	0	0	0.0163934	0
solcap_snp_sl_31819	3	7.9111	0.0070922	0.0462963	0	0.230769	0.222222	0.5	0.0625	0.0121951	0	0.0491803	0.0425532
solcap_snp_sl_19514	3	7.92106	0.110294	0.245283	0.315789	0.375	0.7	0.7	0.1875	0.141026	0.0392157	0.166667	0.347826
solcap_snp_sl_19513	3	7.92107	0	0.037037	0.0588235	0.1	0.142857	0.0967742	0	0	0	0.0909091	0
solcap_snp_sl_19511	3	7.92131	0.106383	0.219048	0.277778	0.347826	0.545455	0.625	0.133333	0.134146	0.0384615	0.137931	0.319149
solcap_snp_sl_31817	3	7.92846	0.110294	0.214953	0.350877	0.52	0.4	0.74359	0.866667	0.141026	0.0392157	0.133333	0.319149
solcap_snp_sl_19509	3	7.92881	0.110294	0.2	0.351852	0.454545	0.444444	0.74359	0.933333	0.141026	0.0392157	0.118644	0.304348
solcap_snp_sl_19508	3	7.98807	0.109489	0.261682	0.283333	0.269231	0.555556	0.243243	0.9375	0.139241	0.0392157	0.183333	0.361702
solcap_snp_sl_19504	3	8.05661	0.0070922	0.0185185	0.288136	0.384615	0.4	0.725	0.0625	0.0121951	0	0	0.0425532
solcap_snp_sl_6790	3	8.11357	0.421053	0.102804	0.196429	0.208333	0.4	0.45	0	0.291139	0.595745	0.1	0.106383
solcap_snp_sl_54887	3	8.18575	0	0.0550459	0	0.111111	0.222222	0.170732	0.6875	0	0	0.0655738	0.0416667
CL016675-0084	3	8.26631	0.0285714	0.00917431	0	0	0	0	0	0.0493827	0	0	0.0208333
CL016675-0242	3	8.26647	0	0.00909091	0	0.0384615	0	0.097561	0.375	0	0	0.0163934	0
solcap_snp_sl_41324	3	8.28389	0	0.0550459	0	0.0769231	0.222222	0.170732	0.916667	0	0	0.0655738	0.0416667
solcap_snp_sl_27094	3	8.29125	0.0070922	0.00909091	0	0.0769231	0	0.190476	0.0625	0.0121951	0	0	0.0204082
solcap_snp_sl_1599	3	8.30833	0.432836	0.179245	0.482759	0.625	1	0.928571	1	0.303797	0.604167	0.163934	0.2
solcap_snp_sl_41353	3	8.42522	0	0.0458716	0	0.0384615	0.2	0.1	0.6	0	0	0.0491803	0.0416667
SGN-U585791_snp124_solcap_snp_sl_41379	3	8.55788	0	0.00909091	0	0.04	0.181818	0.195122	0.733333	0	0	0.0163934	0
solcap_snp_sl_27099	3	8.57106	0.0070922	0.00909091	0	0.0769231	0	0.0930233	0	0.0121951	0	0	0.0204082
PSY1_Promoter_SNP1	3	8.60383	0	0	0	0	0.181818	0.0232558	0.466667	0	0	0	0
SGN-U314429_snp100	3	8.60538	0	0.00909091	0	0.111111	0.181818	0.0731707	0.3125	0	0	0.0163934	0
solcap_snp_sl_41384	3	8.60612	0	0	0	0	0	0	0.125	0	0	0	0
Psy1_250_b	3	8.60739	0	0	0	0	0	0.0731707	0.1875	0	0	0	0
solcap_snp_sl_41389	3	8.61029	0	0	0.0163934	0.0769231	0.272727	0.195122	0.9375	0	0	0	0
solcap_snp_sl_23192	3	8.66387	0.356061	0.186916	0.694915	0.75	0.818182	1	1	0.269231	0.531915	0.0655738	0.347826
solcap_snp_sl_27106	3	8.68792	0.0070922	0.00909091	0.0327869	0.0769231	0	0.142857	0.0625	0.0121951	0	0	0.0204082
solcap_snp_sl_23193	3	8.70814	0.569231	0.669811	0.339623	0.28	0.2	0.075	0.214286	0.649351	0.478261	0.810345	0.5
solcap_snp_sl_27113	3	8.78146	0.0070922	0.00909091	0	0.0416667	0	0.146341	0.9375	0.0121951	0	0.0163934	0
solcap_snp_sl_23195	3	8.841	0.174242	0.682243	0.267857	0.192308	0.272727	0	0	0.197368	0.102041	0.813559	0.520833
solcap_snp_sl_23196	3	8.90422	0.172932	0.59434	0.350877	0.44	0.818182	0.538462	0.9375	0.207792	0.0816327	0.672414	0.5
solcap_snp_sl_12718	3	8.90465	0.159091	0.603774	0.333333	0.44	0.727273	0.341463	0	0.184211	0.0816327	0.689655	0.5
solcap_snp_sl_27130	3	8.92705	0.0070922	0.00909091	0	0.04	0	0.146341	0.9375	0.0121951	0	0.0163934	0
Le004314_168_solcap_snp_sl_27137	3	8.94172	0.0070922	0	0	0	0.0833333	0.0465116	0.2	0.0121951	0	0	0
solcap_snp_sl_27151	3	9.04666	0.0070922	0.00917431	0	0.16	0	0.175	0.9375	0.0121951	0	0.0163934	0
solcap_snp_sl_26280	3	9.16473	0.0070922	0	0	0	0	0.0526316	0.6	0.0121951	0	0	0
solcap_snp_sl_12414	3	9.21427	0.375	0.580952	0.344828	0.269231	0.2	0.047619	0	0.333333	0.458333	0.689655	0.446809
solcap_snp_sl_741	3	9.21647	0.362963	0.563107	0.333333	0.24	0.2	0.0731707	0.0625	0.333333	0.446809	0.678571	0.425532
solcap_snp_sl_26291	3	9.23235	0.0070922	0	0	0	0	0.0540541	0.875	0.0121951	0	0	0
solcap_snp_sl_16433	3	9.26172	0.377778	0.579439	0.389831	0.461538	0.111111	0.297297	1	0.35	0.458333	0.694915	0.4375
Le000209_237_solcap_snp_sl_26315	3	9.41686	0.0070922	0.00909091	0	0.0384615	0	0.0487805	0.533333	0.0121951	0	0.0163934	0
CL015709-0329	3	9.41695	0	0.00909091	0	0.0384615	0	0	0	0	0	0.0163934	0
SL10506_244	3	9.51934	0.0070922	0	0	0	0.166667	0.0930233	0.75	0.0121951	0	0	0
solcap_snp_sl_26323	3	9.56063	0.0070922	0.00909091	0	0.0740741	0.0909091	0.15	0.9375	0.0121951	0	0.0163934	0
SGN-U573440_snp365	3	9.69559	0.0070922	0	0.0166667	0.08	0	0.15	0.9375	0.0121951	0	0	0
solcap_snp_sl_26327	3	9.71175	0.0070922	0.00909091	0	0.0740741	0	0.139535	0.625	0.0121951	0	0.0163934	0
solcap_snp_sl_26366	3	10.1588	0.0070922	0.00909091	0.0338983	0.185185	0.363636	0.128205	0.9375	0.0121951	0	0.0163934	0
solcap_snp_sl_26385	3	10.4746	0.0070922	0	0	0.0384615	0.2	0.0789474	0.733333	0.0121951	0	0	0
solcap_snp_sl_26387	3	10.521	0.0070922	0.00909091	0	0.0769231	0.272727	0.0487805	0.333333	0.0121951	0	0.0163934	0
Le004122_27_solcap_snp_sl_26398	3	10.6711	0.0070922	0.00909091	0.0169492	0.32	0.25	0.538462	1	0.0121951	0	0.0163934	0
solcap_snp_sl_26399	3	10.6766	0.0070922	0.00909091	0	0.185185	0.363636	0.230769	0.9375	0.0121951	0	0.0163934	0
solcap_snp_sl_30106	3	11.0663	0.0070922	0.00909091	0	0.153846	0.222222	0.230769	0.9375	0.0121951	0	0.0163934	0
solcap_snp_sl_30098	3	11.2354	0.0070922	0	0	0	0	0.0232558	0.25	0.0121951	0	0	0
solcap_snp_sl_30084	3	11.3028	0.0070922	0.00909091	0	0.111111	0.222222	0.25	0.9375	0.0121951	0	0.0163934	0
solcap_snp_sl_50341	3	11.5014	0.0070922	0	0	0.04	0.222222	0.25	0.875	0.0121951	0	0	0
solcap_snp_sl_4952	3	11.5118	0.0638298	0.100917	0.298246	0.2	0.272727	0.365854	0.0625	0.0609756	0.0576923	0.131148	0.0625
solcap_snp_sl_30078	3	11.62	0.0070922	0	0	0	0	0.0238095	0.0625	0.0121951	0	0	0
solcap_snp_sl_30074	3	11.7259	0.0070922	0.00909091	0	0.0740741	0	0.121951	0.785714	0.0121951	0	0.0163934	0
solcap_snp_sl_30067	3	12.0064	0.0070922	0	0	0	0	0.125	0.8	0.0121951	0	0	0
solcap_snp_sl_18590	3	12.1613	0.0070922	0.0280374	0.207547	0.347826	0.333333	0.435897	0.9375	0.0121951	0	0.0163934	0.0434783
solcap_snp_sl_18588	3	12.1719	0.0070922	0.0277778	0.207547	0.347826	0.8	0.526316	0.9375	0.0121951	0	0.0163934	0.0425532
solcap_snp_sl_30057	3	12.1723	0.0070922	0	0	0	0	0.0238095	0.4	0.0121951	0	0	0
solcap_snp_sl_18585	3	12.1906	0.0070922	0.0277778	0.236364	0.384615	0.7	0.5	0.9375	0.0121951	0	0.0163934	0.0425532
solcap_snp_sl_18584	3	12.1906	0	0.0185185	0.192308	0.24	0.222222	0.307692	0	0	0	0	0.0425532
solcap_snp_sl_18583	3	12.1908	0.0070922	0.0185185	0.222222	0.32	0.571429	0.5	0.9375	0.0121951	0	0	0.0425532
solcap_snp_sl_18582	3	12.1912	0.0070922	0.0277778	0.222222	0.384615	0.571429	0.5	0.9375	0.0121951	0	0.0163934	0.0425532
CL008836-0339	3	12.1915	0	0.00909091	0	0.0384615	0	0	0	0	0	0.0163934	0
CL008836-0249	3	12.1916	0	0.00909091	0	0.0384615	0	0	0	0	0	0.0163934	0
solcap_snp_sl_18581	3	12.1922	0.0070922	0.0277778	0.207547	0.375	0.8	0.512821	0.9375	0.0121951	0	0.0163934	0.0425532
solcap_snp_sl_50331	3	12.2489	0.0070922	0.00909091	0	0.230769	0.333333	0.55	1	0.0121951	0	0.0163934	0
solcap_snp_sl_30046	3	12.4571	0.0070922	0.00917431	0	0.125	0.333333	0.512195	1	0.0121951	0	0.0163934	0
solcap_snp_sl_30038	3	12.7426	0.0070922	0.00909091	0	0.0740741	0	0.097561	0.857143	0.0121951	0	0.0163934	0
solcap_snp_sl_4937	3	12.8669	0.109489	0.650943	0.339623	0.461538	0.857143	0.575	1	0.160494	0.0204082	0.733333	0.543478
solcap_snp_sl_30035	3	13.1928	0.0070922	0.00917431	0	0.2	0.3	0.55	1	0.0121951	0	0.0163934	0
solcap_snp_sl_30033	3	13.3083	0.0070922	0.00909091	0	0.0384615	0	0.0731707	0.6	0.0121951	0	0.0163934	0
solcap_snp_sl_30031	3	14.1769	0.0070922	0.00909091	0	0.08	0	0.097561	0.733333	0.0121951	0	0.0163934	0
solcap_snp_sl_30024	3	14.3675	0.0070922	0.00917431	0	0.16	0.333333	0.536585	1	0.0121951	0	0.0163934	0
solcap_snp_sl_50318	3	14.7438	0.0070922	0.00909091	0	0.0769231	0	0.075	0.75	0.0121951	0	0.0163934	0
solcap_snp_sl_30015	3	14.8764	0.0070922	0.0183486	0	0.2	0.363636	0.575	1	0.0121951	0	0.0327869	0
solcap_snp_sl_30006	3	15.4751	0.0070922	0.0183486	0	0.111111	0.2	0.243902	0.9375	0.0121951	0	0.0327869	0
solcap_snp_sl_31646	3	16.3833	0.0070922	0.0181818	0	0.0384615	0	0.05	0.6875	0.0121951	0	0.0327869	0
solcap_snp_sl_31648	3	16.7788	0.0070922	0.00909091	0	0.0384615	0	0.05	0.666667	0.0121951	0	0.0163934	0
solcap_snp_sl_31653	3	16.877	0.0070922	0.0183486	0	0.111111	0.333333	0.243902	0.9375	0.0121951	0	0.0327869	0
solcap_snp_sl_31655	3	17.1533	0.0070922	0.0181818	0	0.0384615	0	0.05	0.666667	0.0121951	0	0.0327869	0
solcap_snp_sl_28583	3	18.7476	0.0070922	0	0	0	0	0.0232558	0.125	0.0121951	0	0	0
solcap_snp_sl_28586	3	19.4294	0.0070922	0.0183486	0	0.111111	0.2	0.243902	0.9375	0.0121951	0	0.0327869	0
solcap_snp_sl_36888	3	20.2289	0.0070922	0.0181818	0	0.0384615	0	0.05	0.666667	0.0121951	0	0.0327869	0
SGN-U576317_snp104_solcap_snp_sl_32529	3	20.5046	0.0070922	0.0183486	0	0.08	0.333333	0.243902	0.9375	0.0121951	0	0.0327869	0
solcap_snp_sl_32530	3	20.5183	0.0070922	0.0183486	0	0.230769	0.363636	0.575	1	0.0121951	0	0.0327869	0
solcap_snp_sl_29933	3	21.2237	0.0070922	0	0	0	0	0.0232558	0.0625	0.0121951	0	0	0
SGN-U604433_snp183_solcap_snp_sl_29934	3	21.3301	0.0070922	0.0183486	0	0.230769	0.416667	0.575	1	0.0121951	0	0.0327869	0
solcap_snp_sl_29939	3	21.4984	0.0070922	0	0	0	0	0.0232558	0.125	0.0121951	0	0	0
SGN-U564058_snp1352_solcap_snp_sl_29940	3	21.8563	0.0070922	0.00925926	0	0.0769231	0.2	0.243902	0.9375	0.0121951	0	0.0166667	0
solcap_snp_sl_29941	3	21.8564	0.0070922	0	0	0	0	0.0232558	0.0625	0.0121951	0	0	0
solcap_snp_sl_29946	3	22.0913	0.0070922	0	0	0	0	0.05	0.666667	0.0121951	0	0	0
solcap_snp_sl_29948	3	23.7048	0.0070922	0	0	0	0	0.0232558	0.0625	0.0121951	0	0	0
solcap_snp_sl_50297	3	24.2308	0.0070922	0	0	0	0	0.05	0.666667	0.0121951	0	0	0
solcap_snp_sl_50305	3	24.949	0.0070922	0.0181818	0	0.0384615	0	0.05	0.666667	0.0121951	0	0.0327869	0
solcap_snp_sl_50307	3	25.2388	0.0070922	0.0183486	0	0.111111	0.2	0.243902	0.9375	0.0121951	0	0.0327869	0
solcap_snp_sl_4926	3	25.2407	0.101449	0.613208	0.293103	0.2	0.1	0.0232558	0	0.148148	0.02	0.711864	0.489362
solcap_snp_sl_29975	3	25.557	0.0070922	0.0183486	0	0.111111	0.2	0.243902	0.9375	0.0121951	0	0.0327869	0
solcap_snp_sl_29998	3	27.4408	0.0070922	0.0190476	0	0.115385	0.333333	0.263158	0.9375	0.0121951	0	0.0327869	0
solcap_snp_sl_13743	3	27.4462	0	0.0733945	0	0	0	0	0	0	0	0.116667	0.0204082
solcap_snp_sl_51994	3	27.847	0.0070922	0	0	0.04	0.3	0.333333	1	0.0121951	0	0	0
solcap_snp_sl_30528	3	29.0179	0.0070922	0.00925926	0	0.04	0.2	0.243902	0.9375	0.0121951	0	0.0166667	0
solcap_snp_sl_30532	3	29.1513	0.0070922	0.0183486	0	0.111111	0.333333	0.243902	0.9375	0.0121951	0	0.0327869	0
solcap_snp_sl_30533	3	29.3427	0.0070922	0	0	0	0	0.0232558	0.0625	0.0121951	0	0	0
solcap_snp_sl_52143	3	29.4367	0.0070922	0.0192308	0	0.0769231	0.333333	0.268293	0.9375	0.0121951	0	0.0357143	0
SGN-U578356_snp142_solcap_snp_sl_30539	3	29.634	0.0070922	0	0	0	0	0.0232558	0.0625	0.0121951	0	0	0
solcap_snp_sl_5547	3	29.6963	0.101449	0.607477	0.305085	0.2	0.1	0	0	0.148148	0.02	0.7	0.489362
solcap_snp_sl_30540	3	29.7005	0.0070922	0	0	0.0384615	0.2	0.243902	0.9375	0.0121951	0	0	0
Le004377_94	3	29.8966	0.0070922	0.0183486	0	0.111111	0.333333	0.243902	0.9375	0.0121951	0	0.0327869	0
solcap_snp_sl_30543	3	29.8976	0.0070922	0	0	0	0	0.0487805	0.533333	0.0121951	0	0	0
solcap_snp_sl_30552	3	30.6155	0.0070922	0.0183486	0	0.115385	0.222222	0.243902	0.9375	0.0121951	0	0.0327869	0
solcap_snp_sl_30553	3	30.7579	0.0070922	0.0183486	0	0.0769231	0.2	0.243902	0.9375	0.0121951	0	0.0327869	0
solcap_snp_sl_30556	3	30.8921	0.0070922	0.0183486	0	0.111111	0.333333	0.243902	0.9375	0.0121951	0	0.0327869	0
solcap_snp_sl_30559	3	31.039	0.0070922	0.0183486	0	0.0769231	0.2	0.243902	0.9375	0.0121951	0	0.0327869	0
solcap_snp_sl_30571	3	31.3356	0.0070922	0	0	0	0	0.0232558	0.0625	0.0121951	0	0	0
solcap_snp_sl_30580	3	31.8376	0.0070922	0	0	0	0	0.0232558	0.0625	0.0121951	0	0	0
solcap_snp_sl_30586	3	32.617	0.0070922	0	0	0.0384615	0.2	0.243902	0.9375	0.0121951	0	0	0
solcap_snp_sl_30587	3	32.6776	0.0070922	0.0183486	0	0.111111	0.2	0.243902	0.9375	0.0121951	0	0.0327869	0
solcap_snp_sl_30589	3	33.1121	0.0070922	0.0183486	0	0.0769231	0.2	0.243902	0.9375	0.0121951	0	0.0327869	0
solcap_snp_sl_30590	3	33.3417	0.0070922	0	0	0	0	0.05	0.5625	0.0121951	0	0	0
CL015569-0389	3	33.9945	0	0.0181818	0	0.0384615	0	0	0	0	0	0.0327869	0
solcap_snp_sl_30593	3	34.0107	0.0070922	0.0183486	0	0.0769231	0.2	0.243902	0.9375	0.0121951	0	0.0327869	0
solcap_snp_sl_36304	3	38.3883	0.0070922	0	0	0.0384615	0.333333	0.243902	0.9375	0.0121951	0	0	0
solcap_snp_sl_36307	3	38.8009	0.0070922	0.0183486	0	0.115385	0.3	0.243902	0.9375	0.0121951	0	0.0327869	0
solcap_snp_sl_36308	3	38.8016	0.0070922	0.0183486	0	0.115385	0.222222	0.243902	0.9375	0.0121951	0	0.0327869	0
solcap_snp_sl_36309	3	38.8021	0.0070922	0.0183486	0	0.111111	0.2	0.243902	0.9375	0.0121951	0	0.0327869	0
solcap_snp_sl_30354	3	41.1597	0.0070922	0.0183486	0	0.0769231	0.2	0.243902	0.9375	0.0121951	0	0.0327869	0
solcap_snp_sl_51487	3	41.5486	0.0070922	0	0	0	0	0.0487805	0.533333	0.0121951	0	0	0
solcap_snp_sl_30377	3	41.957	0.0070922	0	0	0	0	0.0232558	0.0625	0.0121951	0	0	0
solcap_snp_sl_27253	3	42.0745	0.0070922	0.00917431	0	0.0384615	0.2	0.243902	0.9375	0.0121951	0	0.0163934	0
solcap_snp_sl_27248	3	42.3902	0.0070922	0	0	0	0	0.0487805	0.533333	0.0121951	0	0	0
solcap_snp_sl_27246	3	43.4012	0.0070922	0.00934579	0	0.0769231	0.333333	0.243902	0.9375	0.0121951	0	0.0169492	0
solcap_snp_sl_27243	3	43.5952	0.0070922	0.0183486	0	0.115385	0.363636	0.243902	0.9375	0.0121951	0	0.0327869	0
solcap_snp_sl_27238	3	43.6408	0.0070922	0.0183486	0	0.111111	0.2	0.243902	0.9375	0.0121951	0	0.0327869	0
solcap_snp_sl_1779	3	43.6415	0.875912	0.268519	0.0833333	0.153846	0	0	0	0.839506	0.959184	0.266667	0.270833
solcap_snp_sl_27230	3	43.8891	0.0070922	0	0	0	0	0.0487805	0.533333	0.0121951	0	0	0
solcap_snp_sl_42166	3	43.8895	0.0070922	0.0183486	0	0.115385	0.222222	0.243902	0.9375	0.0121951	0	0.0327869	0
solcap_snp_sl_12799	3	43.8898	0.101449	0.611111	0.305085	0.192308	0.1	0	0	0.148148	0.02	0.7	0.5
solcap_snp_sl_1773	3	43.8915	0.101449	0.607477	0.267857	0.192308	0.1	0	0	0.148148	0.02	0.7	0.489362
solcap_snp_sl_27228	3	44.2265	0.0070922	0	0	0.0384615	0.222222	0.243902	0.9375	0.0121951	0	0	0
solcap_snp_sl_1772	3	44.268	0.110294	0.638095	0.340426	0.5	0.833333	0.65	1	0.1625	0.0204082	0.733333	0.511111
CL016166-0053	3	44.3188	0	0.0181818	0	0.0384615	0	0	0	0	0	0.0327869	0
solcap_snp_sl_27224	3	44.4375	0.0070922	0	0	0	0	0.0238095	0.0666667	0.0121951	0	0	0
solcap_snp_sl_27221	3	44.7253	0.0070922	0	0	0	0	0.0238095	0.0625	0.0121951	0	0	0
solcap_snp_sl_42160	3	44.7801	0.0070922	0.0183486	0	0.115385	0	0.170732	0.8	0.0121951	0	0.0327869	0
solcap_snp_sl_30945	3	45.4434	0.0070922	0.0183486	0	0.0769231	0.2	0.225	0.875	0.0121951	0	0.0327869	0
solcap_snp_sl_5761	3	45.5911	0.0942029	0.509259	0.271186	0.259259	0.2	0.333333	0.0625	0.135802	0.02	0.6	0.395833
solcap_snp_sl_5764	3	45.5933	0.0942029	0.537037	0.271186	0.36	0.6	0.555556	0.75	0.135802	0.02	0.633333	0.416667
solcap_snp_sl_5765	3	45.5941	0.0942029	0.509259	0.271186	0.296296	0.6	0.435897	0.1875	0.135802	0.02	0.6	0.395833
solcap_snp_sl_5766	3	45.5944	0.101449	0.53271	0.280702	0.384615	0.6	0.605263	1	0.148148	0.02	0.633333	0.404255
solcap_snp_sl_5768	3	45.5978	0.0942029	0.523364	0.271186	0.296296	0.6	0.486486	0.2	0.135802	0.02	0.616667	0.404255
solcap_snp_sl_5769	3	45.5979	0.101449	0.528302	0.236364	0.37037	0.555556	0.605263	1	0.148148	0.02	0.633333	0.391304
solcap_snp_sl_5770	3	45.5983	0.0942029	0.509259	0.258621	0.259259	0.2	0.333333	0.0625	0.135802	0.02	0.6	0.395833
solcap_snp_sl_5771	3	45.6137	0.108696	0.53211	0.275862	0.346154	0.6	0.538462	0.8125	0.160494	0.02	0.633333	0.408163
solcap_snp_sl_14002	3	45.6256	0	0	0	0	0	0	0	0	0	0	0
solcap_snp_sl_5772	3	45.6264	0.122302	0.513761	0.254237	0.148148	0.1	0	0	0.17284	0.0392157	0.6	0.408163
solcap_snp_sl_5773	3	45.6301	0.116788	0.509259	0.258621	0.148148	0.1	0.1	0.733333	0.175	0.02	0.6	0.395833
solcap_snp_sl_5774	3	45.6301	0.117647	0.53271	0.258621	0.192308	0.1	0.1	0.75	0.175	0.0204082	0.644068	0.395833
solcap_snp_sl_33651	3	45.7275	0.0070922	0.0181818	0	0.0384615	0	0.0465116	0.3125	0.0121951	0	0.0327869	0
solcap_snp_sl_33652	3	45.7277	0.0070922	0	0	0	0	0.0465116	0.3125	0.0121951	0	0	0
solcap_snp_sl_30631	3	45.9551	0.0070922	0	0	0.08	0.363636	0.575	1	0.0121951	0	0	0
solcap_snp_sl_13958	3	46.0399	0	0.174312	0	0	0	0	0	0	0	0.229508	0.104167
solcap_snp_sl_5656	3	46.0446	0.0888889	0.308411	0.327586	0.28	0.3	0.0487805	0	0.125	0.0408163	0.372881	0.229167
solcap_snp_sl_30657	3	46.0832	0.0070922	0.0183486	0	0.230769	0.5	0.425	0.9375	0.0121951	0	0.0327869	0
solcap_snp_sl_30678	3	46.1754	0.0070922	0.0181818	0	0.0384615	0	0.05	0.533333	0.0121951	0	0.0327869	0
solcap_snp_sl_30704	3	46.3794	0.0070922	0	0	0	0	0.0232558	0.357143	0.0121951	0	0	0
Le011256_136_solcap_snp_sl_30707	3	46.3933	0.0070922	0	0	0	0	0.0232558	0.2	0.0121951	0	0	0
solcap_snp_sl_30722	3	46.4665	0.0070922	0	0.0163934	0	0	0.0232558	0.266667	0.0121951	0	0	0
solcap_snp_sl_18943	3	46.6108	0.0070922	0.0275229	0.0847458	0.222222	0.454545	0.65	1	0.0121951	0	0.0327869	0.0208333
solcap_snp_sl_52337	3	46.634	0.0070922	0.0181818	0	0.0384615	0	0.0238095	0.266667	0.0121951	0	0.0327869	0
CL016221-0325	3	46.6515	0.0070922	0.0183486	0.0338983	0.185185	0.333333	0.435897	1	0.0121951	0	0.0327869	0
solcap_snp_sl_18944	3	46.6771	0	0.00917431	0	0	0	0	0	0	0	0	0.0204082
solcap_snp_sl_30763	3	46.707	0.0070922	0.0181818	0	0.185185	0.166667	0.184211	0.9375	0.0121951	0	0.0327869	0
solcap_snp_sl_30774	3	46.734	0.0070922	0.00909091	0	0.0384615	0	0.0487805	0.642857	0.0121951	0	0.0163934	0
solcap_snp_sl_30776	3	46.7358	0.0070922	0.0181818	0	0.111111	0.181818	0.153846	0.9375	0.0121951	0	0.0327869	0
solcap_snp_sl_18949	3	46.7881	0.0070922	0.0909091	0.0357143	0.24	0.4	0.625	1	0.0121951	0	0.0819672	0.102041
solcap_snp_sl_18952	3	46.8429	0.0214286	0.100917	0.0754717	0.4	0.444444	0.625	1	0.037037	0	0.0819672	0.125
SL10910_315	3	46.849	0.0214286	0.0181818	0	0.0769231	0.166667	0.170732	0.9375	0.037037	0	0.0327869	0
solcap_snp_sl_18959	3	46.8893	0.0214286	0.100917	0.0769231	0.346154	0.444444	0.625	1	0.037037	0	0.0819672	0.125
CL016704-0620	3	46.8915	0	0.0825688	0.0714286	0.259259	0.2	0.425	0.0625	0	0	0.0491803	0.125
solcap_snp_sl_52352	3	46.9052	0.0214286	0	0	0	0	0.0232558	0.125	0.037037	0	0	0
solcap_snp_sl_30813	3	47.1134	0.0214286	0.00909091	0	0	0	0.0232558	0.266667	0.037037	0	0.0163934	0
solcap_snp_sl_30819	3	47.1966	0.0214286	0.0181818	0	0.0384615	0	0.047619	0.1875	0.037037	0	0.0327869	0
solcap_snp_sl_18967	3	47.2169	0.361538	0.183486	0.350877	0.2	0.272727	0.351351	0.0625	0.303797	0.511111	0.0655738	0.333333
solcap_snp_sl_30821	3	47.217	0.0214286	0.0183486	0	0.08	0	0.131579	0.6875	0.037037	0	0.0327869	0
solcap_snp_sl_30825	3	47.3716	0.0214286	0.0183486	0	0.0740741	0	0.125	0.9375	0.037037	0	0.0327869	0
solcap_snp_sl_30827	3	47.47	0.0214286	0	0	0	0	0.0731707	0.833333	0.037037	0	0	0
solcap_snp_sl_30918	3	47.8418	0.0214286	0.0183486	0	0.0384615	0	0.153846	0.9375	0.037037	0	0.0327869	0
solcap_snp_sl_52395	3	47.8965	0.0214286	0.0181818	0	0.0384615	0	0.075	0.75	0.037037	0	0.0327869	0
solcap_snp_sl_30911	3	47.9317	0.0214286	0.0275229	0.116667	0.333333	0	0.461538	1	0.037037	0	0.0327869	0.0208333
solcap_snp_sl_5722	3	48.1428	0.522727	0.433962	0.6	0.44	0.5	0.282051	0.1875	0.5625	0.413043	0.416667	0.456522
solcap_snp_sl_24081	3	48.1936	0.386364	0.0833333	0.0666667	0.04	0	0	0	0.3125	0.543478	0.0163934	0.170213
solcap_snp_sl_30876	3	48.1939	0.0285714	0	0	0	0	0.0238095	0.125	0.0493827	0	0	0
solcap_snp_sl_30359	3	48.3064	0.00714286	0	0	0	0	0.0526316	0.642857	0.0121951	0	0	0
solcap_snp_sl_18985	3	48.3502	0	0.0727273	0.103448	0.12	0.363636	0.414634	0.0625	0	0	0.0491803	0.102041
solcap_snp_sl_18984	3	48.3504	0	0.0727273	0.103448	0.153846	0.363636	0.414634	0.0625	0	0	0.0491803	0.102041
solcap_snp_sl_30862	3	48.3743	0.0285714	0	0	0	0	0.047619	0.4	0.0493827	0	0	0
solcap_snp_sl_30860	3	48.3747	0.0285714	0	0	0	0	0.105263	1	0.0493827	0	0	0
solcap_snp_sl_30857	3	48.4769	0.0285714	0.0181818	0	0.0740741	0	0.1	0.9375	0.0493827	0	0.0327869	0
solcap_snp_sl_30848	3	48.7736	0.0285714	0	0	0	0	0.1	0.9375	0.0493827	0	0	0
solcap_snp_sl_18982	3	48.9325	0	0.118182	0.288462	0.4	0.5	0.475	0.0625	0	0	0.0491803	0.204082
solcap_snp_sl_18981	3	48.9327	0	0.118182	0.303571	0.4	0.6	0.487805	0.125	0	0	0.0491803	0.204082
solcap_snp_sl_30846	3	48.9432	0.0285714	0.136364	0.275862	0.48	0.6	0.634146	0.875	0.0493827	0	0.0819672	0.204082
solcap_snp_sl_18978	3	48.9622	0	0.119266	0.327273	0.458333	0.555556	0.512195	0.0625	0	0	0.05	0.204082
solcap_snp_sl_30840	3	48.994	0.0285714	0	0	0	0	0.0487805	0.533333	0.0493827	0	0	0
solcap_snp_sl_30839	3	49.1291	0.0285714	0	0	0.0416667	0	0.102564	0.9	0.0493827	0	0	0
solcap_snp_sl_30838	3	49.1296	0.0298507	0	0	0.0434783	0	0.153846	0.928571	0.0512821	0	0	0
solcap_snp_sl_30833	3	49.1492	0.0285714	0.0183486	0	0.115385	0	0.125	0.9375	0.0493827	0	0.0327869	0
SL10736_542	3	49.1994	0.0285714	0	0	0	0	0.1	0.733333	0.0493827	0	0	0
solcap_snp_sl_52373	3	49.2256	0.0285714	0	0	0	0	0.0487805	0.25	0.0493827	0	0	0
solcap_snp_sl_52371	3	49.5092	0.0285714	0.0181818	0	0.0384615	0	0.047619	0.6	0.0493827	0	0.0327869	0
solcap_snp_sl_35295	3	49.6786	0.0285714	0	0	0	0	0.0487805	0.266667	0.0493827	0	0	0
solcap_snp_sl_35299	3	49.7626	0.0285714	0.0183486	0	0.0740741	0	0.146341	0.9375	0.0493827	0	0.0327869	0
solcap_snp_sl_35303	3	49.8548	0.0285714	0	0	0.0384615	0	0.097561	0.466667	0.0493827	0	0	0
SL20037_731	3	49.9812	0.0285714	0	0	0	0	0.0243902	0.666667	0.0493827	0	0	0
solcap_snp_sl_35313	3	50.0387	0.0285714	0	0	0	0	0.146341	0.9375	0.0493827	0	0	0
solcap_snp_sl_35323	3	50.2395	0.0285714	0	0	0	0	0.0238095	0.533333	0.0493827	0	0	0
solcap_snp_sl_35331	3	50.3385	0.0285714	0.0183486	0	0.111111	0.166667	0.170732	0.9375	0.0493827	0	0.0327869	0
solcap_snp_sl_35332	3	50.3393	0.0285714	0.0183486	0	0.0769231	0.166667	0.15	0.75	0.0493827	0	0.0327869	0
solcap_snp_sl_35333	3	50.3393	0.0215827	0	0	0	0	0.0238095	0.272727	0.0375	0	0	0
solcap_snp_sl_35335	3	50.3396	0.0285714	0.0183486	0	0.0769231	0.166667	0.170732	0.9375	0.0493827	0	0.0327869	0
SGN-U582610_snp835_solcap_snp_sl_35344	3	50.4233	0.0285714	0.0183486	0	0.153846	0.166667	0.175	0.9375	0.0493827	0	0.0327869	0
solcap_snp_sl_35345	3	50.4233	0.0285714	0.0181818	0	0.0384615	0	0.0243902	0.533333	0.0493827	0	0.0327869	0
solcap_snp_sl_65736	3	50.9861	0.0285714	0.0183486	0	0.08	0.166667	0.170732	0.9375	0.0493827	0	0.0327869	0
solcap_snp_sl_35369	3	51.2311	0.0285714	0	0	0.04	0.181818	0.146341	0.875	0.0493827	0	0	0
solcap_snp_sl_65758	3	51.3813	0.0285714	0.0183486	0	0.115385	0.181818	0.195122	0.9375	0.0493827	0	0.0327869	0
solcap_snp_sl_35382	3	51.8747	0.0285714	0.0183486	0.0535714	0.153846	0.222222	0.325	1	0.0493827	0	0.0327869	0
solcap_snp_sl_35391	3	51.9905	0.0285714	0	0	0	0	0.097561	0.333333	0.0493827	0	0	0
solcap_snp_sl_35394	3	52.1484	0.0285714	0	0	0.0384615	0.181818	0.121951	0.875	0.0493827	0	0	0
solcap_snp_sl_35397	3	52.3366	0.0285714	0	0	0	0	0.0238095	0.25	0.0493827	0	0	0
solcap_snp_sl_35407	3	52.5288	0.0070922	0.0183486	0	0.0740741	0	0.125	0.875	0.0121951	0	0.0327869	0
solcap_snp_sl_35413	3	52.6091	0.0070922	0.0183486	0	0.0769231	0.181818	0.15	0.9375	0.0121951	0	0.0327869	0
solcap_snp_sl_35443	3	52.7856	0.0070922	0.0183486	0	0.0384615	0	0.075	0.714286	0.0121951	0	0.0327869	0
solcap_snp_sl_35458	3	52.8286	0.0070922	0	0	0.04	0.181818	0.146341	0.384615	0.0121951	0	0	0
solcap_snp_sl_35459	3	52.8295	0.0070922	0.0183486	0	0.148148	0.181818	0.153846	0.9375	0.0121951	0	0.0327869	0
solcap_snp_sl_10372	3	52.8562	0.218978	0.504673	0.59322	0.73913	0.727273	0.769231	0.875	0.291139	0.0961538	0.389831	0.645833
CL016760-0706	3	52.9015	0	0.0550459	0.118644	0.153846	0.4	0.230769	0.0666667	0	0	0	0.122449
CL016760-0427	3	52.9018	0	0.00909091	0	0.0384615	0	0	0	0	0	0.0163934	0
solcap_snp_sl_35497	3	52.9526	0.0070922	0	0	0.037037	0.181818	0.1	0.8	0.0121951	0	0	0
solcap_snp_sl_10377	3	52.9536	0.343284	0.440367	0.416667	0.230769	0	0.142857	0	0.329114	0.367347	0.366667	0.530612
solcap_snp_sl_35540	3	53.0861	0.0214286	0.0727273	0.20339	0.269231	0.3	0.315789	0.9375	0.0246914	0.0192308	0.0327869	0.122449
solcap_snp_sl_21677	3	53.096	0.404412	0.0642202	0.206897	0.153846	0.1	0.170732	0	0.481481	0.333333	0	0.145833
CL016938-0536	3	53.0987	0.410448	0.0366972	0.0517241	0.148148	0.0833333	0.243243	0.9375	0.493827	0.326087	0.0327869	0.0416667
solcap_snp_sl_21682	3	53.1174	0.402985	0.0366972	0.0677966	0.185185	0.0833333	0.27027	0.9375	0.4875	0.319149	0.0327869	0.0416667
solcap_snp_sl_21683	3	53.1176	0.4	0.0277778	0.0344828	0.153846	0	0.27027	0.9375	0.4875	0.3125	0.0166667	0.0416667
solcap_snp_sl_21684	3	53.1281	0.407407	0.0366972	0.0517241	0.185185	0.0833333	0.297297	0.9375	0.493827	0.319149	0.0327869	0.0416667
solcap_snp_sl_21685	3	53.1654	0.402985	0.0181818	0.0350877	0.0769231	0	0.230769	0.733333	0.4875	0.319149	0	0.0408163
CL017533-0189	3	53.2302	0	0.0181818	0	0.0384615	0	0	0	0	0	0.0327869	0
CL017725-0420	3	53.3305	0	0.0181818	0	0.0384615	0	0	0	0	0	0.0327869	0
solcap_snp_sl_35601	3	53.4405	0	0.0181818	0	0.0769231	0	0.0238095	0.25	0	0	0.0327869	0
solcap_snp_sl_21694	3	53.5057	0.371212	0.102804	0.542373	0.56	0.363636	0.846154	0.9375	0.5	0.2	0.0491803	0.173913
solcap_snp_sl_35619	3	53.5497	0	0.0181818	0	0.111111	0	0.153846	0.875	0	0	0.0327869	0
solcap_snp_sl_35638	3	53.7844	0	0	0	0.0416667	0	0.0238095	0.733333	0	0	0	0
solcap_snp_sl_35650	3	53.8743	0.203008	0.816514	0.298246	0.153846	0	0	0	0.166667	0.204082	0.934426	0.666667
solcap_snp_sl_35677	3	54.0225	0	0.00909091	0	0	0	0.0238095	0.5	0	0	0.0163934	0
solcap_snp_sl_35693	3	54.0783	0	0.0183486	0	0.04	0	0.1	0.666667	0	0	0.0327869	0
solcap_snp_sl_35697	3	54.1089	0	0.0190476	0	0.0416667	0.0909091	0.1875	0.866667	0	0	0.0333333	0
solcap_snp_sl_21714	3	54.1123	0.358209	0.109091	0.0655738	0.115385	0	0.25	0	0.275	0.553191	0.0327869	0.204082
solcap_snp_sl_25390	3	54.1316	0.353383	0.12037	0.0877193	0.26087	0.333333	0.625	1	0.275	0.543478	0.0655738	0.191489
solcap_snp_sl_65873	3	54.2181	0	0.0183486	0	0.04	0	0.102564	0.666667	0	0	0.0327869	0
solcap_snp_sl_35720	3	54.3526	0	0	0	0	0	0.047619	0.1875	0	0	0	0
solcap_snp_sl_65880	3	54.4281	0	0.0183486	0	0.0384615	0	0.0277778	0.666667	0	0	0.0327869	0
CL015971-0495	3	54.4361	0.132353	0.0186916	0.0526316	0.12	0.0833333	0.428571	0.875	0.0731707	0.255319	0	0.0425532
CL015971-0443	3	54.4361	0	0.00909091	0	0.0384615	0	0	0	0	0	0.0163934	0
solcap_snp_sl_65890	3	54.5161	0	0	0	0.0769231	0	0.0238095	0.5	0	0	0	0
solcap_snp_sl_31018	3	54.8861	0.0070922	0.0183486	0	0.115385	0.222222	0.243902	0.9375	0.0121951	0	0.0327869	0
solcap_snp_sl_58651	3	55.6854	0	0.0183486	0	0.0769231	0	0.205128	0.9375	0	0	0.0327869	0
solcap_snp_sl_20088	3	55.7154	0.556391	0.280374	0.237288	0.407407	0.7	0.7	1	0.435897	0.755102	0.116667	0.489362
solcap_snp_sl_14715	3	55.8	0.593985	0.101852	0.2	0.185185	0.166667	0.175	0	0.582278	0.680851	0.0655738	0.148936
solcap_snp_sl_14714	3	55.8	0.609023	0.121495	0.20339	0.346154	0.583333	0.55	1	0.594937	0.702128	0.0983607	0.152174
solcap_snp_sl_58630	3	55.8203	0	0	0	0	0	0	0.428571	0	0	0	0
solcap_snp_sl_58614	3	55.8963	0	0.00909091	0	0	0	0	0.571429	0	0	0.0163934	0
solcap_snp_sl_7942	3	55.9821	0.366412	0.46729	0.275862	0.185185	0	0.0465116	0	0.531646	0.108696	0.525424	0.395833
solcap_snp_sl_7940	3	55.9867	0.341085	0.121495	0.215686	0.36	0.666667	0.525	1	0.181818	0.622222	0.0983607	0.152174
solcap_snp_sl_7939	3	56.0051	0.320611	0.0952381	0.189655	0.291667	0.363636	0.414634	0.8125	0.177215	0.6	0.0666667	0.133333
solcap_snp_sl_58584	3	56.0518	0	0.0181818	0	0.04	0	0.025	0.857143	0	0	0.0327869	0
solcap_snp_sl_58550	3	56.3224	0	0.0181818	0	0.0769231	0	0.0243902	0.769231	0	0	0.0327869	0
solcap_snp_sl_7919	3	56.4392	0.378788	0.141509	0.425926	0.56	0.555556	0.880952	1	0.2375	0.644444	0.0983607	0.2
solcap_snp_sl_58518	3	56.4815	0.0289855	0.046729	0	0.153846	0	0.153846	0.9375	0.0253165	0.0192308	0.0655738	0.0217391
solcap_snp_sl_20069	3	56.4904	0	0.0186916	0.0666667	0	0	0	0	0	0	0	0.0425532
solcap_snp_sl_15960	3	56.6283	0	0.01	0	0.0625	0	0	0	0	0	0.0172414	0
CL017449-0340	3	56.6494	0	0.00909091	0	0.0384615	0	0	0	0	0	0.0163934	0
solcap_snp_sl_69353	3	56.6564	0	0.00909091	0	0.115385	0	0.025	0.857143	0	0	0.0163934	0
solcap_snp_sl_11602	3	56.6997	0.363636	0.596154	0.254237	0.148148	0.0833333	0.0232558	0	0.538462	0.104167	0.610169	0.577778
solcap_snp_sl_62544	3	56.8213	0	0	0	0.037037	0	0	0.133333	0	0	0	0
solcap_snp_sl_9391	3	56.8219	0.335878	0.00934579	0.0689655	0.185185	0	0.219512	0.0625	0.189873	0.622222	0	0.0217391
solcap_snp_sl_9385	3	56.8472	0.346154	0.00925926	0.101695	0.222222	0	0.307692	0.0625	0.205128	0.622222	0	0.0212766
solcap_snp_sl_62531	3	57.0019	0	0.00917431	0	0.0416667	0	0.102564	0.866667	0	0	0	0.0204082
solcap_snp_sl_9383	3	57.0125	0.610687	0.0462963	0.101695	0.384615	0.363636	0.375	0.9375	0.448718	0.87234	0.0327869	0.0638298
solcap_snp_sl_9382	3	57.0304	0.615385	0.0462963	0.103448	0.423077	0.444444	0.475	1	0.454545	0.87234	0.0327869	0.0638298
solcap_snp_sl_9381	3	57.05	0.565891	0.0943396	0.0689655	0.269231	0.3	0.25	0.133333	0.394737	0.829787	0.0327869	0.177778
solcap_snp_sl_20937	3	57.0501	0.565891	0.102804	0.0983607	0.259259	0.363636	0.25	0.133333	0.394737	0.829787	0.0327869	0.195652
solcap_snp_sl_20936	3	57.0665	0.561538	0.101852	0.0983607	0.148148	0	0.139535	0	0.38961	0.829787	0.0327869	0.191489
solcap_snp_sl_62520	3	57.0716	0	0.00917431	0	0.148148	0	0.0526316	0.8125	0	0	0.0163934	0
solcap_snp_sl_9379	3	57.0886	0	0.296296	0.0327869	0	0	0	0	0	0	0.423729	0.142857
solcap_snp_sl_20933	3	57.0891	0.00714286	0.106796	0.157895	0.166667	0	0.219512	0	0	0	0.0338983	0.204545
solcap_snp_sl_9377	3	57.0999	0.561538	0.102804	0.0983607	0.148148	0	0.0697674	0	0.38961	0.829787	0.0327869	0.195652
solcap_snp_sl_20932	3	57.1423	0	0.0825688	0.220339	0.28	0	0.190476	0	0	0	0.0333333	0.142857
CL015346-0143_solcap_snp_sl_62495	3	57.2169	0.423077	0.179245	0	0.16	0	0.0238095	0.733333	0.584416	0.191489	0.233333	0.108696
CL015346-0229	3	57.217	0	0.00909091	0	0.0384615	0	0	0	0	0	0.0163934	0
solcap_snp_sl_9372	3	57.2205	0.49635	0.0925926	0.0689655	0.115385	0	0.0487805	0	0.333333	0.72	0.0327869	0.170213
CL015371-0327	3	57.3469	0	0.00909091	0	0.0384615	0	0	0	0	0	0.0163934	0
solcap_snp_sl_62473	3	57.358	0.419847	0.179245	0	0.0769231	0	0.0238095	0.533333	0.571429	0.208333	0.216667	0.130435
solcap_snp_sl_9366	3	57.3666	0.472441	0.165138	0.362069	0.269231	0	0.214286	0	0.36	0.630435	0.0327869	0.333333
SGN-U565563_snp1042_solcap_snp_sl_62467	3	57.3794	0.419847	0.196262	0	0.12	0	0.146341	0.642857	0.571429	0.208333	0.233333	0.148936
CL016891-0260	3	57.4432	0.415385	0.196262	0	0.2	0	0.15	0.666667	0.558442	0.212766	0.233333	0.148936
CL016891-0194	3	57.4433	0	0.00909091	0	0.0384615	0	0	0	0	0	0.0163934	0
CL015455-0169	3	57.4996	0.415385	0.192308	0	0.125	0	0.025	0.733333	0.558442	0.212766	0.241379	0.130435
solcap_snp_sl_62444	3	57.5355	0.575758	0.161905	0.0163934	0.04	0	0	0.285714	0.769231	0.234043	0.206897	0.106383
solcap_snp_sl_62409	3	57.6497	0.58209	0.140187	0.0163934	0	0	0	0.1875	0.769231	0.265306	0.15	0.12766
CL017416-0060	3	57.6709	0	0	0	0	0	0	0	0	0	0	0
CL017416-0406	3	57.6712	0.585185	0.17757	0.0163934	0.12	0	0.175	0.9375	0.772152	0.265306	0.183333	0.170213
solcap_snp_sl_9344	3	57.691	0.293233	0.100917	0.116667	0.230769	0	0.139535	0	0.151899	0.553191	0.0491803	0.166667
SL10909_238	3	57.7276	0.526718	0.0636364	0.0163934	0.115385	0	0.175	0.8	0.697368	0.265306	0.0491803	0.0816327
solcap_snp_sl_62377	3	57.764	0.530769	0.0636364	0.0163934	0.115385	0	0.175	0.9375	0.697368	0.270833	0.0491803	0.0816327
CL015860-0475	3	57.7994	0.526718	0.0550459	0.0163934	0.08	0	0.0238095	0.8125	0.697368	0.265306	0.0491803	0.0625
CL017298-0054_solcap_snp_sl_62362	3	57.8226	0.507576	0.0545455	0.0327869	0.192308	0.166667	0.205128	0.9375	0.662338	0.265306	0.0491803	0.0612245
CL017298-0393	3	57.8229	0	0.00909091	0	0.0384615	0	0	0	0	0	0.0163934	0
SL10206_98	3	57.8867	0.0070922	0.00909091	0.0491803	0.185185	0.0909091	0.292683	0.0625	0	0	0	0.0204082
solcap_snp_sl_62348	3	57.8949	0.503759	0.0550459	0.0655738	0.28	0.166667	0.5	1	0.649351	0.244898	0.0333333	0.0816327
solcap_snp_sl_62336	3	58.0945	0.522727	0.0545455	0.0163934	0.08	0	0.146341	0.8125	0.675325	0.270833	0.0327869	0.0816327
SL10450_71	3	58.1996	0.569231	0.0458716	0.0163934	0.12	0	0.0243902	0.785714	0.746667	0.291667	0.0327869	0.0625
solcap_snp_sl_62300	3	58.2075	0.5625	0.0366972	0.0163934	0.08	0	0	0.357143	0.743243	0.276596	0.0163934	0.0625
solcap_snp_sl_20895	3	58.2513	0.0142857	0.0454545	0.140351	0.28	0	0.219512	0.0625	0	0.0196078	0	0.102041
solcap_snp_sl_62270	3	58.3591	0.570312	0.0545455	0.0163934	0.173913	0	0.142857	0.8125	0.743243	0.297872	0.0327869	0.0816327
CL004545-0306	3	58.401	0.0070922	0.00909091	0	0.0384615	0	0	0	0	0.0192308	0.0163934	0
solcap_snp_sl_62259	3	58.4013	0.518797	0.0458716	0.0163934	0.25	0	0.025	0.666667	0.710526	0.22	0.0327869	0.0625
solcap_snp_sl_62245	3	58.4274	0.55814	0.0550459	0.107143	0.478261	0.285714	0.780488	1	0.743243	0.25	0.0327869	0.0833333
solcap_snp_sl_62228	3	58.5384	0.534884	0.037037	0.0163934	0.0869565	0	0.0769231	0.8	0.733333	0.212766	0.0166667	0.0625
solcap_snp_sl_9298	3	58.566	0.222222	0.867925	0.298246	0.208333	0.111111	0.0232558	0.0625	0.175	0.3125	0.966667	0.73913
solcap_snp_sl_62224	3	58.5939	0.192593	0.0747664	0.535714	0.416667	0.272727	0.243902	0.2	0.0769231	0.38	0.0163934	0.152174
solcap_snp_sl_20883	3	58.6393	0	0.0181818	0.0666667	0.0769231	0	0	0	0	0	0	0.0408163
solcap_snp_sl_62209	3	58.6397	0.542636	0.037037	0.0163934	0.0833333	0	0.128205	0.9375	0.743243	0.229167	0.0327869	0.0425532
solcap_snp_sl_9292	3	58.6419	0.223881	0.895238	0.438596	0.304348	0.3	0	0	0.164557	0.333333	0.966667	0.8
solcap_snp_sl_62180	3	58.7428	0.590551	0.0366972	0.0163934	0.0769231	0	0.0487805	0.714286	0.77027	0.304348	0.0327869	0.0416667
solcap_snp_sl_62166	3	58.8032	0.587786	0.0277778	0.0163934	0.0740741	0	0.0238095	0.133333	0.779221	0.276596	0.0163934	0.0425532
solcap_snp_sl_34221	3	58.8365	0	0	0.0327869	0.148148	0	0.214286	0	0	0	0	0
CL015369-0414	3	58.8765	0	0.0181818	0	0.0384615	0	0.15	0.9375	0	0	0.0163934	0.0204082
solcap_snp_sl_62133	3	58.9508	0	0.0181818	0	0.04	0	0.15	0.9375	0	0	0.0163934	0.0204082
CL017463-0220_solcap_snp_sl_62120	3	58.9869	0	0.0181818	0	0.0769231	0	0.15	0.9375	0	0	0.0163934	0.0204082
solcap_snp_sl_9260	3	59.0572	0.354331	0.0747664	0.104167	0.666667	0.571429	0.902439	1	0.157895	0.681818	0.0327869	0.130435
solcap_snp_sl_34216	3	59.0653	0	0	0.0327869	0.148148	0	0.139535	0	0	0	0	0
solcap_snp_sl_34213	3	59.0783	0.0214286	0.0185185	0.0892857	0.36	0.0833333	0.512195	0.0625	0	0.0392157	0.0163934	0.0212766
solcap_snp_sl_34210	3	59.0828	0.0214286	0.0185185	0.0727273	0.36	0.0833333	0.512195	0.0625	0	0.0392157	0.0163934	0.0212766
solcap_snp_sl_34207	3	59.0974	0.0214286	0.0183486	0.0727273	0.346154	0.0833333	0.512195	0.0625	0	0.0392157	0.0163934	0.0208333
solcap_snp_sl_34206	3	59.0977	0.0214286	0.0185185	0.0892857	0.36	0.0833333	0.512195	0.0625	0	0.0392157	0.0163934	0.0212766
solcap_snp_sl_34205	3	59.0978	0.0214286	0.0183486	0.0727273	0.346154	0.0833333	0.512195	0.0625	0	0.0392157	0.0163934	0.0208333
solcap_snp_sl_34204	3	59.0979	0.0214286	0.0185185	0.0727273	0.36	0.0833333	0.512195	0.0625	0	0.0392157	0.0163934	0.0212766
solcap_snp_sl_34203	3	59.0983	0.0214286	0.0183486	0.0877193	0.333333	0.0833333	0.512195	0.0625	0	0.0392157	0.0163934	0.0208333
solcap_snp_sl_34202	3	59.0986	0.0214286	0.0183486	0.0892857	0.346154	0.0833333	0.512195	0.0625	0	0.0392157	0.0163934	0.0208333
solcap_snp_sl_9253	3	59.099	0.328244	0.0366972	0.0166667	0.111111	0	0.0232558	0	0.153846	0.630435	0	0.0833333
solcap_snp_sl_34200	3	59.0997	0	0	0.0338983	0.185185	0	0.142857	0	0	0	0	0
solcap_snp_sl_34199	3	59.0999	0.0214286	0.0183486	0.0714286	0.346154	0.0833333	0.512195	0.0625	0	0.0392157	0.0163934	0.0208333
solcap_snp_sl_9252	3	59.1018	0.351145	0.0740741	0.152542	0.615385	0.545455	0.853659	1	0.153846	0.673913	0.0327869	0.12766
solcap_snp_sl_34196	3	59.1022	0.0283688	0.037037	0.0892857	0.416667	0.0833333	0.617647	0.8	0	0.0576923	0.0327869	0.0425532
solcap_snp_sl_34195	3	59.1023	0.0214286	0.0183486	0.0877193	0.346154	0.0833333	0.512195	0.0625	0	0.0392157	0.0163934	0.0208333
solcap_snp_sl_34193	3	59.1029	0.0214286	0.0183486	0.0714286	0.333333	0.0833333	0.512195	0.0625	0	0.0392157	0.0163934	0.0208333
solcap_snp_sl_34187	3	59.1484	0	0	0.0344828	0.185185	0	0.261905	0	0	0	0	0
solcap_snp_sl_34186	3	59.1493	0	0	0.0344828	0.185185	0	0.261905	0	0	0	0	0
CL015171-0072	3	59.1999	0	0	0	0	0	0	0	0	0	0	0
CL015171-0254	3	59.2001	0	0.0555556	0.0833333	0.0769231	0	0.047619	0.666667	0	0	0.0163934	0.106383
solcap_snp_sl_34175	3	59.311	0	0	0.0327869	0.153846	0	0.162791	0	0	0	0	0
solcap_snp_sl_62037	3	59.3378	0	0.0277778	0.05	0.08	0	0	0.8	0	0	0	0.0638298
solcap_snp_sl_9244	3	59.3674	0.641791	0.00909091	0.05	0.259259	0	0.139535	0	0.5875	0.787234	0	0.0204082
solcap_snp_sl_9241	3	59.3788	0.207143	0.853211	0.338983	0.115385	0.272727	0	0	0.259259	0.0769231	0.967213	0.708333
solcap_snp_sl_9238	3	59.418	0.649635	0.0636364	0.103448	0.4	0.1	0.384615	0.866667	0.5875	0.78	0.0163934	0.122449
solcap_snp_sl_9237	3	59.4181	0.642336	0.00990099	0.0526316	0.32	0.0909091	0.333333	0.0666667	0.5875	0.76	0	0.0217391
solcap_snp_sl_9235	3	59.4201	0.661654	0.00909091	0.0526316	0.296296	0	0.214286	0	0.602564	0.791667	0	0.0204082
CL016051-0063	3	59.4212	0	0	0	0	0	0	0	0	0	0	0
solcap_snp_sl_20865	3	59.4215	0.659091	0.0183486	0.0526316	0.333333	0	0.315789	0.5	0.597403	0.791667	0	0.0416667
solcap_snp_sl_9229	3	59.431	0.641791	0.00917431	0.0517241	0.296296	0.0909091	0.365854	0.2	0.582278	0.770833	0	0.0208333
solcap_snp_sl_9228	3	59.4316	0.659091	0.00917431	0.0847458	0.32	0.181818	0.365854	0.2	0.597403	0.791667	0	0.0208333
solcap_snp_sl_62008	3	59.4522	0	0.0458716	0.0526316	0.0740741	0	0.0487805	0.666667	0	0	0.0163934	0.0833333
solcap_snp_sl_9226	3	59.4524	0.649254	0.0636364	0.12963	0.416667	0.0833333	0.525	1	0.582278	0.791667	0.0163934	0.122449
solcap_snp_sl_9218	3	59.5254	0.641791	0.0909091	0.0909091	0.48	0.0833333	0.536585	1	0.582278	0.770833	0.0163934	0.183673
solcap_snp_sl_24926	3	59.5944	0.314961	0.00909091	0.0333333	0.259259	0	0.139535	0	0.146667	0.622222	0	0.0204082
CL015437-0110_solcap_snp_sl_61967	3	59.6191	0	0.0733945	0.05	0.08	0	0.0238095	0.6	0	0	0.0163934	0.145833
solcap_snp_sl_34165	3	59.6826	0	0	0.0163934	0.115385	0	0.0465116	0	0	0	0	0
solcap_snp_sl_34163	3	59.6971	0	0.0727273	0.0862069	0.36	0.272727	0.307692	0.9375	0	0	0.0163934	0.142857
SGN-U584349_snp118	3	59.8799	0	0	0	0.0769231	0.25	0.0232558	0.133333	0	0	0	0
solcap_snp_sl_61938	3	59.9031	0	0.0363636	0.0517241	0.2	0.3	0.121951	0.9375	0	0	0.0163934	0.0612245
SGN-U565536_snp46769	3	59.9354	0	0.0363636	0.0666667	0.2	0.363636	0.121951	0.9375	0	0	0.0163934	0.0612245
SGN-U604240_snp45533	3	59.9367	0	0.0363636	0.0666667	0.192308	0.363636	0.097561	0.75	0	0	0.0163934	0.0612245
SGN-U604240_snp45509	3	59.9367	0	0.0363636	0.0666667	0.192308	0.363636	0.097561	0.75	0	0	0.0163934	0.0612245
CL017760-0371_solcap_snp_sl_61928	3	59.9416	0	0.0275229	0.0508475	0.12	0	0.0243902	0.733333	0	0	0.0163934	0.0416667
CL017760-0099	3	59.9418	0	0	0	0	0	0	0	0	0	0	0
CL015662-0214	3	60.0722	0	0.0272727	0.0689655	0.125	0	0.175	0.9375	0	0	0.0163934	0.0408163
solcap_snp_sl_34143	3	60.1151	0	0	0.0169492	0.148148	0	0.0232558	0	0	0	0	0
SGN-U579212_snp23699	3	60.1236	0	0	0	0	0	0.0930233	0.2	0	0	0	0
SGN-U579212_snp24949	3	60.1248	0	0	0	0	0	0.0930233	0.2	0	0	0	0
SGN-U579212_snp25451	3	60.1253	0	0	0	0	0	0.0930233	0.2	0	0	0	0
SGN-U579212_snp25597	3	60.1255	0	0	0	0	0	0.0930233	0.2	0	0	0	0
SGN-U582689_snp30543	3	60.1304	0	0	0	0.037037	0	0.0697674	0.266667	0	0	0	0
solcap_snp_sl_61886	3	60.1531	0	0.0275229	0.0666667	0.111111	0	0.047619	0.125	0	0	0.0327869	0.0208333
solcap_snp_sl_61881	3	60.1936	0	0.0181818	0.0508475	0.0769231	0	0.0731707	0.642857	0	0	0.0163934	0.0204082
solcap_snp_sl_61880	3	60.1942	0	0.0183486	0.0689655	0.08	0	0.243902	0.9375	0	0	0.0163934	0.0208333
solcap_snp_sl_34141	3	60.331	0	0	0.0163934	0.148148	0	0.0232558	0.133333	0	0	0	0
solcap_snp_sl_61875	3	60.341	0.0431655	0.0183486	0.0508475	0.0769231	0	0.190476	0.642857	0.0625	0	0.0163934	0.0208333
CL015521-0417	3	60.3935	0	0.00909091	0.05	0.0740741	0	0	0.25	0	0	0	0.0204082
solcap_snp_sl_20835	3	60.4196	0.0428571	0.0181818	0.118644	0.0384615	0	0	0	0.0487805	0.0196078	0	0.0408163
solcap_snp_sl_61853	3	60.4584	0.0431655	0.0183486	0.0701754	0.0769231	0	0.166667	0.714286	0.0625	0	0.0163934	0.0208333
solcap_snp_sl_61847	3	60.5162	0.0431655	0.0181818	0.103448	0.0740741	0	0.0769231	0.714286	0.0625	0	0.0163934	0.0204082
solcap_snp_sl_61820	3	60.6986	0.0431655	0.00917431	0	0.04	0	0.214286	0.866667	0.0625	0	0.0163934	0
solcap_snp_sl_9141	3	60.7731	0.351145	0.711538	0.45098	0.217391	0.333333	0.219512	0.9375	0.333333	0.369565	0.844828	0.543478
solcap_snp_sl_9140	3	60.7736	0.351145	0.691589	0.410714	0.208333	0.333333	0.0731707	0.785714	0.333333	0.369565	0.830508	0.520833
solcap_snp_sl_9139	3	60.7737	0.360902	0.707547	0.45283	0.24	0.4	0.0731707	0.785714	0.341772	0.382979	0.844828	0.541667
solcap_snp_sl_9138	3	60.7738	0.348485	0.688679	0.410714	0.208333	0.333333	0.0731707	0.785714	0.333333	0.361702	0.827586	0.520833
solcap_snp_sl_9137	3	60.7739	0.351145	0.701923	0.433962	0.208333	0.333333	0.0731707	0.714286	0.333333	0.369565	0.842105	0.531915
solcap_snp_sl_9136	3	60.7776	0.360902	0.708738	0.418182	0.208333	0.333333	0.219512	0.666667	0.341772	0.382979	0.842105	0.543478
solcap_snp_sl_9135	3	60.7779	0.360902	0.711538	0.45098	0.25	0.333333	0.219512	0.9375	0.341772	0.382979	0.844828	0.543478
solcap_snp_sl_9134	3	60.7783	0.351145	0.688679	0.410714	0.2	0.333333	0.0731707	0.8	0.333333	0.369565	0.827586	0.520833
solcap_snp_sl_9133	3	60.7786	0.348485	0.688679	0.410714	0.208333	0.333333	0.0731707	0.8	0.333333	0.361702	0.827586	0.520833
solcap_snp_sl_9132	3	60.7787	0.348485	0.691589	0.410714	0.208333	0.333333	0.0731707	0.8	0.333333	0.361702	0.830508	0.520833
solcap_snp_sl_9131	3	60.7788	0.351145	0.688679	0.410714	0.2	0.333333	0.0731707	0.8	0.333333	0.369565	0.827586	0.520833
solcap_snp_sl_61803	3	60.779	0.353383	0.691589	0.4	0.2	0.333333	0.0731707	0.8	0.341772	0.361702	0.830508	0.520833
solcap_snp_sl_9130	3	60.7874	0.363636	0.768519	0.421053	0.24	0.4	0.219512	0.785714	0.333333	0.404255	0.933333	0.5625
solcap_snp_sl_9129	3	60.7875	0.368421	0.766355	0.421053	0.230769	0.4	0.219512	0.785714	0.341772	0.404255	0.933333	0.553191
SL10494_706_CL009124-0515	3	60.7907	0.365672	0.768519	0.421053	0.230769	0.4	0.219512	0.785714	0.341772	0.395833	0.933333	0.5625
CL009124-0423	3	60.7908	0	0	0	0	0	0	0	0	0	0	0
solcap_snp_sl_9128	3	60.7954	0.353846	0.766355	0.4	0.217391	0.333333	0.219512	0.9375	0.333333	0.377778	0.933333	0.553191
solcap_snp_sl_9127	3	60.7959	0.358779	0.773585	0.45098	0.208333	0.333333	0.190476	0.266667	0.333333	0.391304	0.933333	0.565217
solcap_snp_sl_9126	3	60.7963	0.358779	0.766355	0.410714	0.208333	0.333333	0.219512	0.857143	0.333333	0.391304	0.933333	0.553191
solcap_snp_sl_24909	3	60.8024	0.358779	0.766355	0.410714	0.24	0.333333	0.2	0.857143	0.333333	0.391304	0.933333	0.553191
solcap_snp_sl_9125	3	60.8027	0.368421	0.768519	0.421053	0.24	0.4	0.219512	0.857143	0.341772	0.404255	0.933333	0.5625
solcap_snp_sl_9124	3	60.8027	0.0510204	0.757282	0.2	0.0909091	0	0.219512	0.857143	0.0508475	0.0571429	0.931034	0.533333
solcap_snp_sl_9123	3	60.8036	0.353846	0.766355	0.410714	0.208333	0.333333	0.219512	0.846154	0.333333	0.377778	0.933333	0.553191
solcap_snp_sl_9122	3	60.8037	0.353846	0.766355	0.410714	0.217391	0.333333	0.219512	0.9375	0.333333	0.377778	0.933333	0.553191
solcap_snp_sl_15173	3	60.8068	0.353846	0.766355	0.4	0.208333	0.333333	0.219512	0.928571	0.333333	0.377778	0.933333	0.553191
solcap_snp_sl_9118	3	60.8075	0.368421	0.768519	0.421053	0.24	0.4	0.219512	0.928571	0.341772	0.404255	0.933333	0.5625
solcap_snp_sl_61800	3	60.8172	0.294574	0.785047	0.410714	0.208333	0.333333	0.05	0.466667	0.246753	0.377778	0.933333	0.595745
solcap_snp_sl_9117	3	60.8177	0.40625	0.101852	0.245283	0.454545	0.333333	0.162791	0	0.527027	0.234043	0.0166667	0.208333
solcap_snp_sl_9116	3	60.8179	0.305344	0.787037	0.45098	0.24	0.333333	0.05	0.533333	0.25641	0.391304	0.933333	0.604167
solcap_snp_sl_9115	3	60.8183	0.305344	0.785047	0.410714	0.208333	0.333333	0.0731707	0.538462	0.25641	0.391304	0.933333	0.595745
solcap_snp_sl_20809	3	60.85	0.572519	0.138889	0.396226	0.68	0.5	0.725	0.357143	0.564103	0.608696	0.0491803	0.255319
solcap_snp_sl_20803	3	60.8593	0.568182	0.146789	0.384615	0.692308	0.454545	0.928571	0.666667	0.564103	0.595745	0.0491803	0.270833
solcap_snp_sl_20802	3	60.8601	0.410853	0.834862	0.553571	0.24	0.5	0.0465116	0.142857	0.421053	0.369565	0.934426	0.708333
solcap_snp_sl_20801	3	60.8624	0.431818	0.836364	0.561404	0.269231	0.545455	0.0232558	0.0666667	0.435897	0.404255	0.934426	0.714286
solcap_snp_sl_20800	3	60.8871	0.568182	0.138889	0.428571	0.666667	0.5	0.804878	0.285714	0.564103	0.595745	0.0491803	0.255319
solcap_snp_sl_34126	3	60.8933	0.581395	0.148148	0.454545	0.708333	0.5	0.780488	0.214286	0.571429	0.622222	0.0491803	0.276596
solcap_snp_sl_61794	3	60.8935	0	0	0	0.037037	0	0	0.0625	0	0	0	0
solcap_snp_sl_34125	3	60.8937	0.584615	0.154545	0.446429	0.692308	0.5	0.902439	0.357143	0.571429	0.630435	0.0491803	0.285714
solcap_snp_sl_34124	3	60.8998	0.572519	0.148148	0.438596	0.653846	0.5	0.780488	0.0625	0.564103	0.608696	0.0491803	0.276596
solcap_snp_sl_20794	3	60.9316	0.568182	0.146789	0.396226	0.653846	0.5	0.925	0.214286	0.564103	0.595745	0.0491803	0.270833
solcap_snp_sl_20779	3	60.9528	0.581395	0.146789	0.438596	0.592593	0.5	0.780488	0.0625	0.571429	0.622222	0.0491803	0.270833
solcap_snp_sl_20777	3	60.9584	0.55814	0.154545	0.428571	0.625	0.5	0.925	0.75	0.571429	0.577778	0.0491803	0.285714
solcap_snp_sl_20776	3	60.9644	0.5625	0.155963	0.436364	0.652174	0.454545	0.925	0.571429	0.571429	0.590909	0.0491803	0.291667
solcap_snp_sl_20775	3	60.9645	0.565891	0.155963	0.428571	0.666667	0.454545	0.925	0.571429	0.571429	0.6	0.0491803	0.291667
solcap_snp_sl_20773	3	60.9708	0.614173	0.146789	0.384615	0.652174	0.5	0.925	0.769231	0.644737	0.590909	0.0491803	0.270833
solcap_snp_sl_20772	3	60.9711	0.609375	0.154545	0.428571	0.625	0.5	0.925	0.8	0.644737	0.577778	0.0491803	0.285714
solcap_snp_sl_20771	3	60.9715	0.545455	0.138889	0.365385	0.576923	0.4	0.775	0.0625	0.564103	0.553191	0.0491803	0.255319
solcap_snp_sl_20770	3	60.9716	0.614173	0.148148	0.436364	0.6	0.5	0.794872	0.25	0.644737	0.590909	0.0491803	0.276596
CL009269-0219	3	60.9731	0.549618	0.146789	0.421053	0.555556	0.416667	0.775	0.0625	0.564103	0.565217	0.0491803	0.270833
CL009269-0272	3	60.9732	0	0	0	0	0	0	0	0	0	0	0
solcap_snp_sl_20769	3	60.9766	0.5625	0.148148	0.428571	0.6	0.454545	0.775	0.0625	0.571429	0.590909	0.0491803	0.276596
solcap_snp_sl_20765	3	60.983	0.390625	0.836364	0.578947	0.375	0.545455	0.0487805	0.0625	0.355263	0.422222	0.934426	0.714286
solcap_snp_sl_20764	3	60.9833	0.5625	0.146789	0.428571	0.6	0.454545	0.775	0.0625	0.571429	0.590909	0.0491803	0.270833
solcap_snp_sl_20763	3	60.9867	0.5625	0.146789	0.428571	0.6	0.454545	0.775	0.0625	0.571429	0.590909	0.0491803	0.270833
solcap_snp_sl_20762	3	60.987	0.557252	0.154545	0.421053	0.615385	0.416667	0.925	0.4375	0.564103	0.586957	0.0491803	0.285714
solcap_snp_sl_34121	3	61.0041	0.5625	0.140187	0.428571	0.6	0.454545	0.775	0.0625	0.571429	0.590909	0.0491803	0.26087
solcap_snp_sl_20760	3	61.0051	0.549618	0.154545	0.421053	0.6	0.416667	0.925	0.357143	0.564103	0.565217	0.0491803	0.285714
solcap_snp_sl_20759	3	61.0096	0.5625	0.140187	0.418182	0.6	0.454545	0.775	0.0714286	0.571429	0.590909	0.0491803	0.26087
solcap_snp_sl_20757	3	61.0304	0.55814	0.148148	0.428571	0.625	0.454545	0.775	0.0625	0.571429	0.577778	0.0491803	0.276596
solcap_snp_sl_20752	3	61.0316	0.614173	0.154545	0.436364	0.652174	0.454545	0.923077	0.384615	0.644737	0.590909	0.0491803	0.285714
solcap_snp_sl_20751	3	61.0489	0.55814	0.146789	0.428571	0.652174	0.454545	0.926829	0.866667	0.571429	0.577778	0.0491803	0.270833
solcap_snp_sl_20748	3	61.0585	0.557252	0.146789	0.421053	0.576923	0.416667	0.756098	0.0769231	0.564103	0.586957	0.0491803	0.270833
solcap_snp_sl_20745	3	61.0607	0.5625	0.148148	0.436364	0.6	0.454545	0.75	0.0625	0.571429	0.590909	0.0491803	0.276596
solcap_snp_sl_20743	3	61.0613	0.553846	0.146789	0.377358	0.625	0.4	0.9	0.4	0.564103	0.577778	0.0491803	0.270833
solcap_snp_sl_20737	3	61.0725	0.5625	0.155963	0.436364	0.695652	0.5	0.904762	0.866667	0.571429	0.590909	0.0491803	0.291667
solcap_snp_sl_20736	3	61.0749	0.55814	0.155963	0.428571	0.695652	0.5	0.904762	0.866667	0.571429	0.577778	0.0491803	0.291667
solcap_snp_sl_20731	3	61.0811	0.55814	0.146789	0.403509	0.538462	0.454545	0.707317	0.0625	0.571429	0.577778	0.0491803	0.270833
solcap_snp_sl_20730	3	61.0953	0.545455	0.12963	0.421053	0.555556	0.454545	0.75	0.0625	0.564103	0.553191	0.0327869	0.255319
solcap_snp_sl_34116	3	61.0966	0.561538	0.137615	0.428571	0.653846	0.5	0.75	0.0625	0.571429	0.586957	0.0327869	0.270833
solcap_snp_sl_34115	3	61.1013	0.546154	0.145455	0.421053	0.72	0.454545	0.95122	0.846154	0.564103	0.555556	0.0327869	0.285714
solcap_snp_sl_61769	3	61.132	0	0	0	0.037037	0	0	0.0625	0	0	0	0
solcap_snp_sl_34114	3	61.1324	0.5625	0.138889	0.372549	0.653846	0.555556	0.875	0.133333	0.571429	0.590909	0.0327869	0.276596
solcap_snp_sl_20724	3	61.1334	0.5625	0.145455	0.428571	0.625	0.5	0.926829	0.846154	0.571429	0.590909	0.0327869	0.285714
solcap_snp_sl_20723	3	61.135	0.566929	0.148148	0.418182	0.625	0.5	0.902439	0.714286	0.571429	0.604651	0.0327869	0.297872
solcap_snp_sl_20721	3	61.157	0.223077	0.146789	0.421053	0.6	0.5	0.902439	0.533333	0.106667	0.395833	0.0327869	0.291667
solcap_snp_sl_20720	3	61.157	0.232558	0.148148	0.428571	0.576923	0.5	0.75	0.0625	0.108108	0.416667	0.0327869	0.297872
solcap_snp_sl_20719	3	61.1647	0.224806	0.12963	0.428571	0.6	0.5	0.775	0.1875	0.106667	0.404255	0.0327869	0.255319
solcap_snp_sl_20718	3	61.1664	0.224806	0.136364	0.428571	0.625	0.5	0.902439	0.2	0.106667	0.404255	0.0327869	0.265306
solcap_snp_sl_20714	3	61.1807	0.244275	0.137615	0.436364	0.64	0.555556	0.95122	0.666667	0.157895	0.354167	0.0327869	0.270833
solcap_snp_sl_20710	3	61.1864	0.19084	0.137615	0.428571	0.625	0.5	0.925	0.285714	0.0789474	0.354167	0.0327869	0.270833
solcap_snp_sl_20703	3	61.1893	0.19084	0.12844	0.428571	0.6	0.454545	0.756098	0.1875	0.0789474	0.354167	0.0327869	0.25
solcap_snp_sl_20702	3	61.2146	0.19084	0.137615	0.436364	0.666667	0.555556	0.906977	0.857143	0.0789474	0.354167	0.0327869	0.270833
solcap_snp_sl_20699	3	61.2156	0.19084	0.136364	0.421053	0.68	0.555556	0.906977	0.866667	0.0789474	0.354167	0.0327869	0.265306
solcap_snp_sl_61762	3	61.2172	0.19084	0.136364	0.428571	0.666667	0.555556	0.904762	0.785714	0.0789474	0.354167	0.0327869	0.265306
solcap_snp_sl_34106	3	61.2793	0	0.0183486	0.296296	0.538462	0.4	0.634146	0.0625	0	0	0	0.0416667
CL015122-0237	3	61.2794	0	0	0	0	0	0	0	0	0	0	0
solcap_snp_sl_20690	3	61.3092	0.0571429	0.0366972	0.169811	0.375	0.333333	0.904762	1	0.0617284	0.0192308	0.0163934	0.0625
CL015880-0286	3	61.3258	0	0	0	0	0	0	0	0	0	0	0
solcap_snp_sl_34105	3	61.3529	0.0571429	0.0277778	0.0980392	0.363636	0.111111	0.833333	1	0.0617284	0.0192308	0.0163934	0.0425532
solcap_snp_sl_61721	3	61.3983	0.0428571	0	0	0.037037	0	0	0.428571	0.0617284	0	0	0
CL015004-0267	3	61.4851	0	0	0	0	0	0	0	0	0	0	0
CL015004-0352	3	61.4852	0	0	0	0	0	0	0	0	0	0	0
solcap_snp_sl_61677	3	61.5197	0.0428571	0	0	0.037037	0	0.0238095	0.461538	0.0617284	0	0	0
solcap_snp_sl_61670	3	61.566	0	0	0	0.037037	0	0.0243902	0.714286	0	0	0	0
solcap_snp_sl_61666	3	61.5745	0	0	0	0.037037	0	0.0238095	0.125	0	0	0	0
solcap_snp_sl_61634	3	61.6741	0	0.0183486	0	0.04	0.0833333	0.315789	0.928571	0	0	0.0163934	0.0208333
SGN-U577717_snp348_solcap_snp_sl_61632	3	61.6804	0	0.0183486	0	0.0833333	0.166667	0.4	0.9375	0	0	0.0163934	0.0208333
SL10678_608	3	61.9195	0.0571429	0	0	0.0384615	0.0833333	0.0487805	0.4375	0.0617284	0.0384615	0	0
solcap_snp_sl_61554	3	62.0042	0	0	0	0	0	0.0238095	0.142857	0	0	0	0
solcap_snp_sl_34089	3	62.0454	0	0	0	0.0384615	0	0.047619	0.0833333	0	0	0	0
solcap_snp_sl_34088	3	62.0593	0	0	0	0.0384615	0	0.097561	0.615385	0	0	0	0
solcap_snp_sl_34056	3	62.2388	0	0	0	0.037037	0	0.0465116	0.0625	0	0	0	0
solcap_snp_sl_34053	3	62.2395	0	0	0	0.037037	0	0.0465116	0.2	0	0	0	0
solcap_snp_sl_34050	3	62.253	0	0	0	0.037037	0	0.0465116	0.25	0	0	0	0
solcap_snp_sl_34048	3	62.2584	0	0	0	0.08	0	0.195122	0.6875	0	0	0	0
SL10003_496	3	62.3016	0	0	0	0	0	0	0.0625	0	0	0	0
solcap_snp_sl_34027	3	62.3474	0	0	0	0.0740741	0	0.0697674	0.266667	0	0	0	0
solcap_snp_sl_34015	3	62.4582	0	0	0	0.0740741	0	0.0697674	0.2	0	0	0	0
solcap_snp_sl_34013	3	62.4664	0	0.00909091	0	0.08	0.0833333	0.225	0.9375	0	0	0	0.0204082
solcap_snp_sl_34007	3	62.516	0	0	0	0.0740741	0	0.0232558	0	0	0	0	0
solcap_snp_sl_33975	3	62.682	0	0.00909091	0	0	0	0.225	0.857143	0	0	0	0.0204082
solcap_snp_sl_33971	3	62.7471	0	0	0	0	0	0.047619	0.133333	0	0	0	0
solcap_snp_sl_33970	3	62.7472	0	0	0	0	0	0.0232558	0	0	0	0	0
solcap_snp_sl_33968	3	62.7647	0	0.00909091	0	0.0384615	0	0.2	0.9375	0	0	0	0.0204082
solcap_snp_sl_33965	3	62.7771	0	0	0	0	0	0.0232558	0	0	0	0	0
solcap_snp_sl_33958	3	62.7919	0	0	0	0	0	0.0465116	0.133333	0	0	0	0
solcap_snp_sl_33949	3	62.8177	0	0	0	0.037037	0	0.0465116	0.533333	0	0	0	0
solcap_snp_sl_33948	3	62.8182	0	0	0	0.0384615	0	0.0571429	0.692308	0	0	0	0
solcap_snp_sl_33935	3	62.8755	0	0	0	0.037037	0	0.047619	0.333333	0	0	0	0
SL20050_135	3	62.8771	0	0	0	0.0769231	0	0.175	0.8	0	0	0	0
solcap_snp_sl_33933	3	62.8786	0	0	0	0.037037	0	0.0232558	0.0666667	0	0	0	0
CL017699-0108_solcap_snp_sl_61460	3	63.0624	0	0	0	0	0	0.0238095	0.733333	0	0	0	0
solcap_snp_sl_61437	3	63.1639	0	0.00909091	0	0	0	0.15	0.9375	0	0	0	0.0204082
solcap_snp_sl_33905	3	63.2964	0	0.00917431	0.0163934	0	0	0.2	0.538462	0	0	0	0.0208333
solcap_snp_sl_61411	3	63.3356	0	0.00917431	0	0	0	0.175	0.866667	0	0	0	0.0208333
Le007369_198	3	63.3523	0	0.00909091	0.0163934	0.037037	0	0.146341	0.5	0	0	0	0.0204082
solcap_snp_sl_33882	3	63.3537	0	0	0	0	0	0.0697674	0.5	0	0	0	0
CL000226-0238	3	63.3537	0	0	0	0	0	0	0	0	0	0	0
solcap_snp_sl_33877	3	63.4032	0	0	0	0	0	0.0487805	0.866667	0	0	0	0
solcap_snp_sl_33855	3	63.5242	0	0.00909091	0	0	0	0.153846	0.933333	0	0	0	0.0204082
solcap_snp_sl_33838	3	63.6083	0	0	0	0.0416667	0	0.6	1	0	0	0	0
solcap_snp_sl_33830	3	63.8131	0	0.0272727	0.0517241	0.208333	0.272727	0.684211	0.416667	0	0	0.0163934	0.0408163
solcap_snp_sl_33829	3	63.8136	0	0.0272727	0.037037	0.217391	0.3	0.7	1	0	0	0.0163934	0.0408163
solcap_snp_sl_33828	3	63.8137	0	0.0181818	0.037037	0.16	0.333333	0.540541	0.0625	0	0	0.0163934	0.0204082
solcap_snp_sl_33827	3	63.8139	0	0.0181818	0.0689655	0.16	0.272727	0.552632	0.0769231	0	0	0.0163934	0.0204082
solcap_snp_sl_33822	3	63.8625	0	0.0181818	0.0350877	0.16	0.272727	0.589744	0.1875	0	0	0.0163934	0.0204082
solcap_snp_sl_33819	3	63.9661	0.380952	0.0925926	0.290909	0.5	0.5	0.953488	1	0.368421	0.44186	0.0327869	0.170213
solcap_snp_sl_33817	3	64.0945	0.296	0.0366972	0.12069	0.153846	0.0833333	0.447368	0	0.28	0.372093	0.0163934	0.0625
solcap_snp_sl_33815	3	64.1356	0.298387	0.0458716	0.0576923	0.208333	0.0833333	0.7	0.875	0.283784	0.372093	0.0163934	0.0833333
solcap_snp_sl_61238	3	64.2811	0	0.00909091	0	0.04	0	0.102564	0.9375	0	0	0	0.0204082
solcap_snp_sl_36548	3	64.3155	0.212598	0.037037	0.134615	0.269231	0.444444	0.463415	0.0625	0.285714	0.116279	0.0163934	0.0638298
CL016304-0420	3	64.3276	0	0	0	0	0	0	0	0	0	0	0
solcap_snp_sl_22017	3	64.3971	0.330882	0.925234	0.611111	0.391304	0.375	0.0465116	0	0.3375	0.244898	0.983607	0.847826
solcap_snp_sl_36544	3	64.4183	0.359375	0.0377358	0.142857	0.409091	0.444444	0.738095	1	0.5	0.162791	0	0.0888889
solcap_snp_sl_67705	3	64.4456	0	0.00909091	0	0.04	0	0.102564	0.875	0	0	0	0.0204082
[truncated: 5,313 more rows]
