# Supplementary material for: High-Density SNP Genotyping of Tomato (Solanum lycopersicum L.) Reveals Patterns of Genetic Variation Due to Breeding
Source: PLoS One. 2012 Sep 20;7(9):e45520. doi: 10.1371/journal.pone.0045520 (PMC3447764; doi:10.1371/journal.pone.0045520)
Supplement: Table S6 — Candidates for loci under positive selection between processing and fresh market sub-populations. (XLSX) [file pone.0045520.s008.xlsx]

## Sheet: Table S6
Table S6. Candidates for loci under positive selection between processing and fresh market sub-populations
	Physical Map		Genetic Map (EXPIM 2012)
Marker	Chromosome	Position (Mbp)	Chromosome	Position (cM)	He1	Fst1	P(Simul Fst<sample Fst)
solcap_snp_sl_19068	1	38.2763	1	40.8382	0.086364	0.082192	0.96765
solcap_snp_sl_18635	1	67.0378	1	41.1144	0.091743	0.087558	0.985062
solcap_snp_sl_18634	1	67.3664	1	41.3907	0.090909	0.086758	0.982803
solcap_snp_sl_18627	1	67.5123	1	41.3907	0.09633	0.092166	0.995311
solcap_snp_sl_15707	2	30.7071	2	8.5421	0.436691	0.418179	0.994463
solcap_snp_sl_25449	2	35.8017	2	32.4654	0.294005	0.241582	0.960649
solcap_snp_sl_25448	2	35.8027	2	32.4654	0.295487	0.243179	0.963281
solcap_snp_sl_25421	2	35.9905	2	32.7366	0.27397	0.245314	0.966662
solcap_snp_sl_65977	2	35.9905	2	32.7366	0.279091	0.250642	0.974398
solcap_snp_sl_35771	2	36.0052	2	32.7366	0.28461	0.243873	0.964397
solcap_snp_sl_25420	2	36.0056	2	32.7366	0.281136	0.240221	0.958337
solcap_snp_sl_35755	2	36.299	2	34.1098	0.29516	0.267289	0.991839
solcap_snp_sl_49304	2	36.3655	2	34.1098	0.291629	0.263626	0.988892
solcap_snp_sl_23849	2	36.3657	2	34.1098	0.291629	0.263626	0.988892
solcap_snp_sl_13611	2	37.0431	2	36.0201	0.307318	0.284677	0.995206
solcap_snp_sl_13612	2	37.0433	2	36.0201	0.311799	0.289299	0.997588
solcap_snp_sl_13616	2	37.0436	2	36.0201	0.30555	0.282824	0.993987
solcap_snp_sl_13617	2	37.0438	2	36.0201	0.311799	0.289299	0.997588
solcap_snp_sl_13618	2	37.0438	2	36.0201	0.311799	0.289299	0.997588
solcap_snp_sl_13619	2	37.0439	2	36.0201	0.307318	0.284677	0.995206
solcap_snp_sl_29547	2	37.0445	2	36.0201	0.308333	0.285528	0.995715
solcap_snp_sl_13621	2	37.0565	2	36.0201	0.311799	0.289299	0.997588
solcap_snp_sl_13622	2	37.0566	2	36.0201	0.311799	0.289299	0.997588
solcap_snp_sl_13623	2	37.0568	2	36.0201	0.311818	0.289182	0.997539
solcap_snp_sl_4829	2	41.726	2	53.5955	0.823198	0.815105	0.986171
solcap_snp_sl_4831	2	41.7962	2	53.8667	0.80308	0.768045	0.976504
solcap_snp_sl_14355	3	7.08513	3	24.7852	0.254545	0.251142	0.975071
solcap_snp_sl_55037	3	7.34138	3	26.4314	0.09633	0.092166	0.995311
SGN-U564013_snp1820_solcap_snp_sl_55020	3	7.51844	3	28.0867	0.09633	0.092166	0.995311
solcap_snp_sl_18982	3	48.9325	3	52.8266	0.118182	0.114155	1
solcap_snp_sl_18981	3	48.9327	3	52.8266	0.118182	0.114155	1
solcap_snp_sl_18978	3	48.9622	3	52.8266	0.119266	0.115207	1
SL10322_127	4	33.4064	4	39.6186	0.567628	0.500345	0.962343
solcap_snp_sl_47385	4	61.5127	4	80.3717	0.308295	0.268736	0.979739
solcap_snp_sl_47708	4	62.9451	4	89.9994	0.285654	0.270175	0.993809
solcap_snp_sl_47713	4	62.9896	4	89.9994	0.268116	0.265455	0.990426
solcap_snp_sl_47741	4	63.128	4	90.2737	0.298692	0.270953	0.990394
solcap_snp_sl_47742	4	63.1282	4	90.2737	0.292502	0.239962	0.95789
solcap_snp_sl_29322	4	63.4518	4	91.6328	0.259091	0.255708	0.980799
solcap_snp_sl_23831	5	3.44377	5	25.3638	0.471541	0.450493	1
solcap_snp_sl_23823	5	3.49161	5	25.9078	0.464983	0.405994	0.96796
solcap_snp_sl_23812	5	3.50232	5	25.9078	0.464722	0.40569	0.967625
solcap_snp_sl_23806	5	3.58016	5	26.4591	0.462132	0.393621	0.954578
solcap_snp_sl_23796	5	3.63739	5	27.0104	0.454709	0.432321	0.999889
solcap_snp_sl_23794	5	3.63813	5	27.0104	0.471255	0.430665	0.986762
solcap_snp_sl_23783	5	3.72022	5	27.8335	0.683202	0.643683	0.987849
solcap_snp_sl_23782	5	3.73717	5	27.8335	0.67724	0.636931	0.988956
solcap_snp_sl_23781	5	3.73727	5	27.8335	0.681884	0.642194	0.990779
solcap_snp_sl_23780	5	3.7373	5	27.8335	0.67724	0.636931	0.988956
solcap_snp_sl_23778	5	3.74867	5	27.8335	0.678515	0.63837	0.98947
solcap_snp_sl_23777	5	3.74873	5	27.8335	0.678035	0.642832	0.99099
solcap_snp_sl_23776	5	3.74898	5	27.8335	0.679809	0.639831	0.98998
solcap_snp_sl_23775	5	3.74911	5	27.8335	0.676416	0.635979	0.98861
solcap_snp_sl_48914	5	3.75473	5	27.8335	0.679809	0.639831	0.98998
solcap_snp_sl_23774	5	3.75561	5	27.8335	0.675147	0.634547	0.98808
solcap_snp_sl_23772	5	3.75638	5	27.8335	0.678515	0.63837	0.98947
solcap_snp_sl_48912	5	3.75723	5	27.8335	0.675147	0.634547	0.98808
solcap_snp_sl_48911	5	3.75772	5	27.8335	0.675147	0.634547	0.98808
solcap_snp_sl_23769	5	3.75803	5	27.8335	0.678035	0.642832	0.99099
solcap_snp_sl_23768	5	3.75861	5	27.8335	0.682453	0.642816	0.990984
solcap_snp_sl_48909	5	3.76274	5	27.8335	0.679809	0.639831	0.98998
solcap_snp_sl_23766	5	3.76388	5	27.8335	0.676754	0.64141	0.990518
solcap_snp_sl_23765	5	3.76417	5	27.8335	0.676416	0.635979	0.98861
solcap_snp_sl_23763	5	3.76435	5	27.8335	0.675147	0.634547	0.98808
solcap_snp_sl_23757	5	3.8072	5	28.1047	0.679809	0.639831	0.98998
solcap_snp_sl_23756	5	3.82245	5	28.6561	0.685844	0.673413	0.997786
solcap_snp_sl_23755	5	3.82246	5	28.6561	0.679011	0.638907	0.989659
CL017677-0317	5	3.82265	5	28.6561	0.689914	0.677622	0.995627
solcap_snp_sl_23751	5	3.82346	5	28.6561	0.688538	0.676199	0.995065
solcap_snp_sl_23750	5	3.82383	5	28.6561	0.68633	0.673894	0.997886
solcap_snp_sl_23749	5	3.82406	5	28.6561	0.688538	0.676199	0.995065
solcap_snp_sl_23746	5	3.86645	5	28.9274	0.681884	0.642194	0.990779
solcap_snp_sl_48904	5	3.86967	5	28.9274	0.681121	0.641313	0.990485
solcap_snp_sl_23743	5	3.87688	5	28.9274	0.681884	0.642194	0.990779
solcap_snp_sl_23742	5	3.87719	5	28.9274	0.678515	0.63837	0.98947
solcap_snp_sl_23741	5	3.87726	5	28.9273	0.676525	0.630086	0.986355
solcap_snp_sl_48901	5	3.93332	5	29.1986	0.708829	0.672797	0.983485
solcap_snp_sl_23738	5	3.93452	5	29.1986	0.711903	0.700518	0.998556
solcap_snp_sl_23737	5	3.93453	5	29.1986	0.718967	0.707867	0.974088
solcap_snp_sl_48900	5	3.94842	5	29.1986	0.715435	0.704193	0.97273
solcap_snp_sl_48898	5	3.94936	5	29.1986	0.705461	0.668971	0.980678
solcap_snp_sl_23735	5	3.95667	5	29.4698	0.705461	0.668971	0.980678
solcap_snp_sl_23734	5	3.98085	5	29.4698	0.702093	0.665145	0.977756
solcap_snp_sl_23733	5	3.9873	5	29.4698	0.700649	0.663513	0.988911
solcap_snp_sl_23731	5	3.98766	5	29.4698	0.702093	0.665145	0.977756
solcap_snp_sl_23726	5	4.03584	5	29.741	0.70484	0.693169	0.995768
solcap_snp_sl_48888	5	4.14654	5	31.6747	0.307143	0.279739	0.991616
solcap_snp_sl_23711	5	4.149	5	31.6747	0.304348	0.276803	0.988964
solcap_snp_sl_23709	5	4.15003	5	31.6747	0.305755	0.278282	0.990348
solcap_snp_sl_23707	5	4.15249	5	31.6747	0.291216	0.262872	0.988223
solcap_snp_sl_23706	5	4.15283	5	31.6747	0.299336	0.271585	0.990864
solcap_snp_sl_23705	5	4.15313	5	31.6747	0.297861	0.270035	0.99372
solcap_snp_sl_23702	5	4.15794	5	31.6747	0.305755	0.278282	0.990348
solcap_snp_sl_23695	5	4.16493	5	31.6747	0.307143	0.279739	0.991616
solcap_snp_sl_23690	5	4.17778	5	31.9459	0.30292	0.275303	0.987462
solcap_snp_sl_23687	5	4.21501	5	32.2172	0.30869	0.281272	0.992847
solcap_snp_sl_50898	5	6.38509	5	42.6564	0.084615	0.081081	0.96344
solcap_snp_sl_13798	5	8.15664	5	47.05	0.552754	0.519062	0.98044
SL10639_108	5	8.21515	5	47.3212	0.549802	0.531875	0.987307
solcap_snp_sl_51094	5	8.35478	5	47.5925	0.566946	0.541777	0.988689
solcap_snp_sl_51118	5	9.82219	5	47.8637	0.55574	0.514511	0.977753
solcap_snp_sl_51121	5	10.038	5	48.1349	0.552256	0.510698	0.975411
solcap_snp_sl_51126	5	10.1125	5	48.1349	0.552256	0.510698	0.975411
solcap_snp_sl_51127	5	10.2949	5	48.1349	0.554809	0.505801	0.972288
solcap_snp_sl_51134	5	10.5892	5	48.1349	0.624506	0.589842	0.966226
solcap_snp_sl_51142	5	10.7023	5	48.1349	0.624506	0.589842	0.966226
CL016021-0379_solcap_snp_sl_51155	5	11.5272	5	48.1349	0.617589	0.582262	0.961586
solcap_snp_sl_51160	5	11.6026	5	48.1349	0.625415	0.590828	0.966811
solcap_snp_sl_51175	5	11.8989	5	48.1349	0.618447	0.583192	0.962169
solcap_snp_sl_51181	5	12.5271	5	48.1349	0.61413	0.578472	0.959174
solcap_snp_sl_51184	5	12.5308	5	48.1349	0.62536	0.590471	0.966599
solcap_snp_sl_51200	5	13.087	5	48.1349	0.627273	0.592844	0.967993
solcap_snp_sl_51201	5	13.1417	5	48.1349	0.626337	0.591829	0.9674
SL10469_202_CL009113-0189	5	13.1427	5	48.1349	0.622828	0.587982	0.965111
solcap_snp_sl_51211	5	13.6199	5	48.1349	0.62332	0.582102	0.961486
solcap_snp_sl_51212	5	14.7192	5	48.1349	0.62083	0.584577	0.96303
solcap_snp_sl_51220	5	15.2622	5	48.1349	0.618396	0.582832	0.961944
solcap_snp_sl_51227	5	15.4947	5	48.1349	0.62332	0.582102	0.961486
solcap_snp_sl_51230	5	16.0377	5	48.1349	0.625415	0.590828	0.966811
solcap_snp_sl_51242	5	16.8407	5	48.1349	0.62536	0.590471	0.966599
solcap_snp_sl_51244	5	17.6217	5	48.1349	0.629846	0.595675	0.969622
SL10526_469	5	18.7386	5	48.1349	0.627142	0.612333	0.978454
solcap_snp_sl_51628	5	19.2748	5	48.1349	0.625415	0.590828	0.966811
solcap_snp_sl_51607	5	20.2699	5	48.1349	0.625415	0.590828	0.966811
solcap_snp_sl_51594	5	20.7004	5	48.1349	0.624506	0.589842	0.966226
solcap_snp_sl_51587	5	22.0716	5	48.1349	0.625415	0.590828	0.966811
solcap_snp_sl_51573	5	22.4038	5	48.1349	0.625415	0.590828	0.966811
solcap_snp_sl_51556	5	22.8285	5	48.1349	0.625415	0.590828	0.966811
solcap_snp_sl_51551	5	23.5395	5	48.1349	0.625415	0.590828	0.966811
solcap_snp_sl_51543	5	23.8772	5	48.1349	0.635287	0.601331	0.972768
solcap_snp_sl_51538	5	24.2349	5	48.1349	0.622774	0.587624	0.964894
solcap_snp_sl_67774	5	25.5302	5	48.1349	0.627273	0.592844	0.967993
solcap_snp_sl_51281	5	26.3497	5	48.1349	0.622828	0.587982	0.965111
solcap_snp_sl_52238	5	28.9618	5	48.1349	0.621931	0.58701	0.964522
CL015150-0478_solcap_snp_sl_52240	5	29.0323	5	48.1349	0.621931	0.58701	0.964522
solcap_snp_sl_52243	5	29.1736	5	48.1349	0.622828	0.587982	0.965111
solcap_snp_sl_52255	5	29.3638	5	48.1349	0.621931	0.58701	0.964522
solcap_snp_sl_52257	5	30.1684	5	48.1349	0.625415	0.590828	0.966811
solcap_snp_sl_52263	5	30.2399	5	48.1349	0.624506	0.589842	0.966226
solcap_snp_sl_52269	5	30.5131	5	48.1349	0.617538	0.581901	0.961359
solcap_snp_sl_52271	5	30.903	5	48.1349	0.621047	0.586052	0.963937
solcap_snp_sl_52280	5	31.6534	5	48.1349	0.620995	0.585693	0.963717
solcap_snp_sl_55294	5	32.9513	5	48.1349	0.621047	0.586052	0.963937
solcap_snp_sl_55297	5	33.0811	5	48.1349	0.621931	0.58701	0.964522
solcap_snp_sl_55302	5	35.3978	5	48.1349	0.620177	0.585107	0.963357
solcap_snp_sl_55309	5	36.2221	5	48.1349	0.624506	0.589842	0.966226
solcap_snp_sl_55315	5	37.243	5	48.1349	0.626337	0.591829	0.9674
solcap_snp_sl_55317	5	37.5161	5	48.1349	0.625415	0.590828	0.966811
solcap_snp_sl_55319	5	37.898	5	48.1349	0.624506	0.589842	0.966226
solcap_snp_sl_55320	5	37.8981	5	48.1349	0.637615	0.610183	0.977389
solcap_snp_sl_55325	5	39.6513	5	48.1349	0.619318	0.584136	0.962757
solcap_snp_sl_55326	5	39.7242	5	48.1349	0.625415	0.590828	0.966811
solcap_snp_sl_55328	5	40.1716	5	48.1349	0.621047	0.586052	0.963937
solcap_snp_sl_55338	5	40.4002	5	48.1349	0.621047	0.586052	0.963937
solcap_snp_sl_55342	5	41.2138	5	48.1349	0.620177	0.585107	0.963357
solcap_snp_sl_55344	5	41.3824	5	48.1349	0.618447	0.583192	0.962169
solcap_snp_sl_55348	5	41.6197	5	48.1349	0.618447	0.583192	0.962169
solcap_snp_sl_55367	5	42.0472	5	48.1349	0.621047	0.586052	0.963937
CL017638-0440	5	42.0526	5	48.1349	0.621931	0.58701	0.964522
solcap_snp_sl_40832	5	44.3125	5	48.1349	0.621931	0.58701	0.964522
solcap_snp_sl_40839	5	45.4147	5	48.1349	0.627273	0.592844	0.967993
solcap_snp_sl_40841	5	45.5401	5	48.1349	0.628166	0.593519	0.968385
solcap_snp_sl_38800	5	48.1532	5	48.1349	0.625415	0.590828	0.966811
solcap_snp_sl_38795	5	48.1542	5	48.1349	0.62361	0.58887	0.965645
SL10373_526	5	50.8497	5	48.1349	0.620706	0.578822	0.959399
solcap_snp_sl_69405	5	51.2476	5	48.1349	0.622774	0.587624	0.964894
solcap_snp_sl_69382	5	54.1269	5	48.1349	0.626337	0.591829	0.9674
solcap_snp_sl_69381	5	54.2365	5	48.1349	0.630808	0.59672	0.970215
solcap_snp_sl_45340	5	55.524	5	48.1349	0.62422	0.583096	0.962109
solcap_snp_sl_56068	5	55.7068	5	48.1349	0.625415	0.590828	0.966811
solcap_snp_sl_56076	5	56.2099	5	48.1349	0.626337	0.591829	0.9674
solcap_snp_sl_56083	5	56.328	5	48.1349	0.625415	0.590828	0.966811
solcap_snp_sl_56091	5	56.3426	5	48.1349	0.622774	0.587624	0.964894
solcap_snp_sl_67804	5	57.1948	5	48.1349	0.62536	0.590471	0.966599
CL017527-0194	5	57.623	5	48.1349	0.633356	0.599522	0.971778
solcap_snp_sl_67793	5	57.6324	5	48.1349	0.621047	0.586052	0.963937
solcap_snp_sl_67790	5	57.7076	5	48.1349	0.634881	0.601214	0.972704
solcap_snp_sl_51446	5	58.0473	5	48.1349	0.555336	0.514081	0.977493
solcap_snp_sl_51459	5	58.2395	5	48.4062	0.454611	0.413531	0.991222
solcap_snp_sl_41311	5	58.4866	5	48.4062	0.458103	0.417282	0.9796
SL10963_93	5	58.5539	5	48.4062	0.461242	0.42991	0.990383
solcap_snp_sl_22559	5	58.7671	5	48.4062	0.780226	0.753954	0.982974
solcap_snp_sl_22560	5	58.7673	5	48.4062	0.779562	0.75321	0.982693
CL009170-0127	5	59.6559	5	49.4911	0.659453	0.616726	0.980559
solcap_snp_sl_37155	5	59.8233	5	49.7623	0.679011	0.638907	0.989659
solcap_snp_sl_37167	5	59.912	5	50.314	0.701604	0.669421	0.981014
solcap_snp_sl_27	5	59.9835	5	51.4137	0.880237	0.869095	0.99408
solcap_snp_sl_28	5	59.9848	5	51.4137	0.879562	0.868337	0.994028
solcap_snp_sl_29	5	59.9889	5	51.4137	0.876812	0.865263	0.993816
solcap_snp_sl_30	5	60.0202	5	51.4137	0.873577	0.858962	0.993363
solcap_snp_sl_16140	5	60.1451	5	51.4137	0.864167	0.843751	0.992158
solcap_snp_sl_12181	5	60.1979	5	51.4137	0.862727	0.841964	0.992006
solcap_snp_sl_37	5	60.2184	5	51.6865	0.868542	0.849209	0.992609
solcap_snp_sl_38	5	60.2184	5	51.6865	0.865337	0.845214	0.992281
solcap_snp_sl_39	5	60.2796	5	52.2443	0.853182	0.830068	0.988603
solcap_snp_sl_25838	5	60.2799	5	52.2443	0.856364	0.834033	0.9892
solcap_snp_sl_40	5	60.2827	5	52.2443	0.864756	0.844488	0.992221
solcap_snp_sl_41	5	60.2857	5	52.2443	0.858927	0.837225	0.99159
solcap_snp_sl_42	5	60.2857	5	52.2443	0.864756	0.844488	0.992221
solcap_snp_sl_43	5	60.3066	5	52.2443	0.862132	0.841219	0.991942
solcap_snp_sl_16141	5	60.3073	5	52.2443	0.858927	0.837225	0.99159
solcap_snp_sl_16142	5	60.3075	5	52.2443	0.858927	0.837225	0.99159
solcap_snp_sl_45	5	60.308	5	52.2443	0.858927	0.837225	0.99159
solcap_snp_sl_46	5	60.3081	5	52.2443	0.858927	0.837225	0.99159
solcap_snp_sl_47	5	60.3081	5	52.2443	0.861528	0.840464	0.991876
solcap_snp_sl_49	5	60.3193	5	52.2443	0.862132	0.841219	0.991942
solcap_snp_sl_51	5	60.3288	5	52.5156	0.864756	0.844488	0.992221
solcap_snp_sl_52	5	60.3289	5	52.5156	0.858927	0.837225	0.99159
solcap_snp_sl_53	5	60.329	5	52.5156	0.861528	0.840464	0.991876
solcap_snp_sl_12187	5	60.3303	5	52.5156	0.858927	0.837225	0.99159
solcap_snp_sl_59	5	60.3389	5	52.5156	0.858927	0.837225	0.99159
solcap_snp_sl_60	5	60.3424	5	52.5156	0.862132	0.841219	0.991942
solcap_snp_sl_25841	5	60.3439	5	52.5156	0.856364	0.834033	0.9892
solcap_snp_sl_16145	5	60.3484	5	52.5156	0.8583	0.836441	0.99152
solcap_snp_sl_25842	5	60.3488	5	52.5156	0.859545	0.837998	0.991659
solcap_snp_sl_63	5	60.3718	5	52.5156	0.856364	0.834033	0.9892
solcap_snp_sl_64	5	60.3728	5	52.5156	0.857664	0.835645	0.991448
solcap_snp_sl_66	5	60.3731	5	52.5156	0.862132	0.841219	0.991942
solcap_snp_sl_68	5	60.3779	5	52.5156	0.8583	0.836441	0.99152
solcap_snp_sl_74	5	60.4222	5	53.8929	0.581692	0.555953	0.975845
solcap_snp_sl_22584	5	60.6395	5	54.1641	0.686243	0.634762	0.983654
solcap_snp_sl_37184	5	60.6408	5	54.1641	0.68072	0.624693	0.984128
solcap_snp_sl_22587	5	60.6409	5	54.1641	0.687984	0.636811	0.98466
solcap_snp_sl_22591	5	60.6458	5	54.1641	0.684535	0.632751	0.982644
solcap_snp_sl_22592	5	60.646	5	54.1641	0.690476	0.639777	0.97317
solcap_snp_sl_22594	5	60.6465	5	54.1641	0.690476	0.639777	0.97317
solcap_snp_sl_22596	5	60.6676	5	54.4353	0.680341	0.627784	0.985423
solcap_snp_sl_22597	5	60.6676	5	54.4354	0.686243	0.634762	0.983654
solcap_snp_sl_22602	5	60.678	5	54.7066	0.686243	0.634762	0.983654
solcap_snp_sl_22603	5	60.6781	5	54.7066	0.682409	0.626705	0.984977
solcap_snp_sl_22604	5	60.7232	5	55.5302	0.730668	0.687445	0.966125
solcap_snp_sl_22607	5	60.7548	5	55.5302	0.729032	0.682679	0.964123
solcap_snp_sl_22609	5	60.7797	5	56.0819	0.730668	0.687445	0.966125
solcap_snp_sl_37190	5	60.9592	5	57.4588	0.80761	0.778839	0.979005
solcap_snp_sl_37191	5	60.9601	5	57.4588	0.812317	0.782873	0.979896
solcap_snp_sl_22620	5	61.016	5	58.0135	0.766121	0.731907	0.982158
solcap_snp_sl_22621	5	61.0162	5	58.0135	0.836223	0.811676	0.985572
solcap_snp_sl_37197	5	61.0198	5	58.0135	0.835123	0.810344	0.985335
solcap_snp_sl_22622	5	61.0317	5	58.0135	0.843607	0.820573	0.987094
solcap_snp_sl_22623	5	61.0335	5	58.0135	0.842156	0.821174	0.987193
solcap_snp_sl_37198	5	61.0345	5	58.0135	0.835518	0.812056	0.985639
solcap_snp_sl_37199	5	61.0384	5	58.0135	0.841883	0.82239	0.987392
solcap_snp_sl_37200	5	61.0402	5	58.0135	0.850819	0.831453	0.988814
solcap_snp_sl_25152	6	2.1625	6	6.0458	0.272078	0.243371	0.963591
solcap_snp_sl_12748	6	36.9312	6	31.6435	0.586364	0.584475	0.992437
solcap_snp_sl_12751	6	36.9331	6	31.6435	0.582569	0.580645	0.990225
solcap_snp_sl_12752	6	36.9343	6	31.6435	0.582569	0.580645	0.990225
solcap_snp_sl_12760	6	36.9586	6	31.6435	0.587156	0.585253	0.992862
solcap_snp_sl_12763	6	36.9589	6	31.6435	0.587156	0.585253	0.992862
solcap_snp_sl_5863	7	57.0362	7	41.941	0.755287	0.728276	0.981031
solcap_snp_sl_53378	7	59.6398	7	54.8689	0.095455	0.091324	0.993823
solcap_snp_sl_53298	7	60.0106	7	55.6915	0.086364	0.082192	0.96765
solcap_snp_sl_53288	7	60.0789	7	56.2428	0.087156	0.082949	0.970408
solcap_snp_sl_12158	7	62.2651	7	68.0711	0.114636	0.086665	0.982532
CL015239-0564	7	62.3002	7	68.0711	0.114636	0.086665	0.982532
solcap_snp_sl_12150	7	62.3033	7	68.0711	0.1111	0.083033	0.970709
solcap_snp_sl_12149	7	62.3034	7	68.0711	0.114636	0.086665	0.982532
solcap_snp_sl_71106	7	62.3838	7	68.0711	0.119117	0.091227	0.983049
solcap_snp_sl_12147	7	62.384	7	68.0711	0.115622	0.087633	0.985267
solcap_snp_sl_12146	7	62.3842	7	68.0711	0.119117	0.091227	0.983049
solcap_snp_sl_12145	7	62.3849	7	68.0711	0.119117	0.091227	0.983049
solcap_snp_sl_12140	7	62.3918	7	68.0711	0.1111	0.083033	0.970709
solcap_snp_sl_12139	7	62.392	7	68.0711	0.119117	0.091227	0.983049
solcap_snp_sl_71099	7	62.4055	7	68.0711	0.1111	0.083033	0.970709
solcap_snp_sl_12137	7	62.4086	7	68.3424	0.1111	0.083033	0.970709
solcap_snp_sl_24384	8	0.216751	8	1.0944	0.656331	0.636637	0.98885
solcap_snp_sl_7272	8	0.236771	8	1.0944	0.666008	0.635341	0.988375
solcap_snp_sl_4429	8	50.8118	8	29.0334	0.756009	0.684668	0.964965
solcap_snp_sl_4390	8	51.6667	8	29.3046	0.772041	0.708376	0.974274
solcap_snp_sl_21461	8	58.4929	8	56.8901	0.105505	0.101382	1
solcap_snp_sl_34761	8	58.7891	8	57.7129	0.110155	0.082108	0.967338
solcap_snp_sl_22842	9	2.2105	9	0.8227	0.298692	0.270953	0.990394
solcap_snp_sl_22840	9	2.21382	9	0.8227	0.302224	0.274617	0.986742
solcap_snp_sl_22839	9	2.21389	9	0.8227	0.298692	0.270953	0.990394
solcap_snp_sl_22838	9	2.21403	9	0.8227	0.293676	0.265731	0.990647
solcap_snp_sl_22837	9	2.21774	9	0.8227	0.305755	0.278282	0.990348
solcap_snp_sl_22836	9	2.21777	9	0.8227	0.299336	0.271585	0.990864
solcap_snp_sl_39452	9	4.9104	9	12.219	0.271802	0.247993	0.970678
solcap_snp_sl_31883	9	17.8815	9	22.175	0.109091	0.105023	1
solcap_snp_sl_30380	9	43.1313	9	22.175	0.109091	0.105023	1
solcap_snp_sl_30379	9	44.8207	9	22.175	0.100917	0.096774	0.999834
solcap_snp_sl_29179	9	61.7321	9	35.3901	0.095455	0.091324	0.993823
CL015614-0412	10	0.468921	10	1.3739	0.663443	0.612338	0.978456
solcap_snp_sl_46059	10	0.482363	10	1.3739	0.675007	0.625804	0.984599
solcap_snp_sl_13200	10	1.05843	10	2.4791	0.818052	0.785249	0.980409
solcap_snp_sl_13202	10	1.16389	10	3.0301	0.678602	0.609986	0.97729
solcap_snp_sl_13203	10	1.17573	10	3.0301	0.677805	0.608963	0.976774
solcap_snp_sl_17859	10	2.33551	10	14.3276	0.110155	0.082108	0.967338
solcap_snp_sl_59184	10	61.0518	10	47.1222	0.118182	0.114155	1
solcap_snp_sl_14909	10	61.0633	10	47.1222	0.118182	0.114155	1
solcap_snp_sl_14910	10	61.0635	10	47.1222	0.119266	0.115207	1
solcap_snp_sl_61192	10	62.4877	10	61.5019	0.651669	0.581453	0.961077
solcap_snp_sl_61131	10	62.7554	10	64.2673	0.291667	0.288372	0.999773
SGN-U598818_snp288_solcap_snp_sl_61127	10	62.7699	10	64.2673	0.277273	0.273973	0.995937
solcap_snp_sl_61108	10	62.8111	10	64.5385	0.282407	0.27907	0.998004
solcap_snp_sl_61089	10	62.8653	10	64.8097	0.303738	0.300469	0.999926
solcap_snp_sl_8807	10	64.3121	10	74.7026	0.311129	0.28852	0.997251
solcap_snp_sl_8795	10	64.4467	10	75.5255	0.304697	0.281854	0.993287
Le013158s_161	10	64.4508	10	75.5255	0.281447	0.257874	0.983246
solcap_snp_sl_8787	10	64.5418	10	75.5255	0.30375	0.280938	0.992588
CL017088-0089	11	3.6525	11	26.2878	0.119117	0.091227	0.983049
solcap_snp_sl_20963	11	3.65298	11	26.2878	0.119117	0.091227	0.983049
solcap_snp_sl_20966	11	3.66942	11	26.2878	0.119117	0.091227	0.983049
solcap_snp_sl_20969	11	3.67038	11	26.2878	0.119117	0.091227	0.983049
solcap_snp_sl_20973	11	3.69188	11	26.2878	0.119117	0.091227	0.983049
solcap_snp_sl_20974	11	3.69313	11	26.2878	0.119117	0.091227	0.983049
C2_At2g22570_43_b	11	3.7065	11	26.8393	0.119117	0.091227	0.983049
solcap_snp_sl_20986	11	3.73802	11	26.8393	0.119117	0.091227	0.983049
solcap_snp_sl_20987	11	3.76387	11	27.1105	0.114636	0.086665	0.982532
solcap_snp_sl_20988	11	3.76398	11	27.1105	0.115622	0.087633	0.985267
solcap_snp_sl_20989	11	3.76406	11	27.1105	0.114636	0.086665	0.982532
solcap_snp_sl_20991	11	3.77641	11	27.3817	0.114636	0.086665	0.982532
solcap_snp_sl_20992	11	3.77669	11	27.3817	0.114636	0.086665	0.982532
solcap_snp_sl_20994	11	3.85528	11	27.3817	0.110155	0.082108	0.967338
solcap_snp_sl_21001	11	3.86217	11	27.3817	0.110155	0.082108	0.967338
solcap_snp_sl_21003	11	3.87033	11	27.3817	0.110155	0.082108	0.967338
solcap_snp_sl_21004	11	3.87226	11	27.3817	0.110155	0.082108	0.967338
solcap_snp_sl_21005	11	3.8723	11	27.3817	0.110155	0.082108	0.967338
solcap_snp_sl_30606	11	47.223	11	51.1478	0.539286	0.485851	0.958351
solcap_snp_sl_52284	11	47.2302	11	51.1478	0.446809	0.397807	0.976765
solcap_snp_sl_5620	11	47.2689	11	51.419	0.531782	0.503309	0.97065
solcap_snp_sl_6151	11	47.4117	11	52.2327	0.572527	0.522963	0.978009
solcap_snp_sl_6142	11	47.5022	11	52.2327	0.52699	0.498243	0.967227
solcap_snp_sl_53066	11	47.5412	11	52.2327	0.564415	0.508514	0.968306
solcap_snp_sl_6138	11	47.5428	11	52.2327	0.564415	0.508514	0.968306
solcap_snp_sl_31135	11	47.5429	11	52.2327	0.565012	0.509171	0.968772
solcap_snp_sl_31134	11	47.5429	11	52.2327	0.561245	0.504886	0.97169
solcap_snp_sl_6137	11	47.5432	11	52.2327	0.564415	0.508514	0.968306
solcap_snp_sl_31133	11	47.5553	11	52.2327	0.561245	0.504886	0.97169
solcap_snp_sl_6132	11	47.5832	11	52.2327	0.560121	0.503652	0.970878
solcap_snp_sl_6130	11	47.5954	11	52.2327	0.574206	0.524919	0.979231
solcap_snp_sl_6129	11	47.5955	11	52.2327	0.569346	0.51408	0.972179
solcap_snp_sl_6119	11	47.6688	11	52.784	0.565012	0.509171	0.968772
solcap_snp_sl_32654	12	4.7778	12	34.5039	0.112063	0.083976	0.974001
solcap_snp_sl_19569	12	15.6707	12	39.4502	0.681657	0.581456	0.961078
solcap_snp_sl_25696	unknown	unknown	5	32.2172	0.302224	0.274617	0.986742
solcap_snp_sl_25698	unknown	unknown	5	32.2172	0.310086	0.282739	0.993927
solcap_snp_sl_40829	unknown	unknown	5	48.1349	0.618396	0.582832	0.961944
solcap_snp_sl_69236	unknown	unknown	5	58.0135	0.850604	0.831102	0.988761
1Pairwise estimates of expected heterozygosity and Fst from the Lositan software [26,27]
