# Supplementary material for: High-Density SNP Genotyping of Tomato (Solanum lycopersicum L.) Reveals Patterns of Genetic Variation Due to Breeding
Source: PLoS One. 2012 Sep 20;7(9):e45520. doi: 10.1371/journal.pone.0045520 (PMC3447764; doi:10.1371/journal.pone.0045520)
Supplement: Table S7 — Candidates for loci under positive selection between processing and vintage sub-populations. (XLSX) [file pone.0045520.s009.xlsx]

## Sheet: Table S7
Table S7. Candidates for loci under positive selection between processing and vintage sub-populations
	Physical Map		Genetic Map (EXPIM 2012)
Marker	Chromosome	Position (Mbp)	Chromosome	Position (cM)	He1	Fst1	P(Simul Fst<sample Fst)
solcap_snp_sl_18634	1	67.3664	1	41.3907	0.336066	0.330578	0.990148
solcap_snp_sl_35868	2	35.2968	2	30.8243	0.374101	0.371841	0.999122
SGN-U581789_snp1077_solcap_snp_sl_35846	2	35.3738	2	30.8243	0.375887	0.373666	0.999389
CL016381-0173_solcap_snp_sl_35845	2	35.3743	2	30.8243	0.370504	0.368231	0.998402
solcap_snp_sl_35844	2	35.3913	2	30.8243	0.374101	0.371841	0.999122
solcap_snp_sl_29814	2	38.4204	2	40.9416	0.138298	0.135231	1
solcap_snp_sl_29826	2	38.5341	2	41.2129	0.138298	0.135231	1
solcap_snp_sl_4829	2	41.726	2	53.5955	0.690278	0.674317	0.982614
solcap_snp_sl_63048	3	0.071076	3	0	0.109929	0.106762	0.990149
CL016802-0675	3	0.119273	3	0	0.109929	0.106762	0.990149
CL017202-0450_solcap_snp_sl_63109	3	0.304215	3	0.2712	0.102837	0.099644	0.97105
CL016925-0828	3	0.346009	3	0.8137	0.102837	0.099644	0.97105
solcap_snp_sl_18978	3	48.9622	3	52.8266	0.333333	0.327434	0.988076
solcap_snp_sl_62377	3	57.764	3	75.1005	0.527833	0.495429	0.957244
SL10450_71	3	58.1996	3	77.574	0.564007	0.534075	0.985859
solcap_snp_sl_62270	3	58.3591	3	79.2284	0.56354	0.533587	0.985201
solcap_snp_sl_62228	3	58.5384	3	80.0512	0.53154	0.499379	0.96372
solcap_snp_sl_62209	3	58.6397	3	80.3269	0.538548	0.506873	0.975305
solcap_snp_sl_34668	4	2.28162	4	15.4052	0.533843	0.49714	0.960076
solcap_snp_sl_34670	4	2.28221	4	15.4052	0.5625	0.527649	0.976663
solcap_snp_sl_21347	4	2.28574	4	15.4052	0.53326	0.496582	0.959156
solcap_snp_sl_21354	4	2.33079	4	15.9564	0.526786	0.522523	0.995048
solcap_snp_sl_24140	4	53.6844	4	47.0164	0.82268	0.801627	0.970286
solcap_snp_sl_24145	4	53.71	4	47.0164	0.823712	0.802811	0.971966
solcap_snp_sl_24555	4	54.4494	4	48.6703	0.82739	0.807002	0.97774
solcap_snp_sl_13133	4	55.0866	4	50.3094	0.955972	0.953856	0.961143
solcap_snp_sl_3103	4	55.1013	4	50.3094	0.952738	0.950391	0.959073
solcap_snp_sl_3104	4	55.1014	4	50.3094	0.952738	0.950391	0.959073
solcap_snp_sl_45616	4	55.1195	4	50.3094	0.952738	0.950391	0.959073
solcap_snp_sl_3106	4	55.1211	4	50.3094	0.952738	0.950391	0.959073
solcap_snp_sl_3107	4	55.1215	4	50.3094	0.952738	0.950391	0.959073
solcap_snp_sl_13134	4	55.123	4	50.3094	0.952738	0.950391	0.959073
solcap_snp_sl_3108	4	55.1599	4	50.8605	0.955972	0.953856	0.961143
solcap_snp_sl_3110	4	55.1667	4	50.8605	0.952738	0.950391	0.959073
solcap_snp_sl_3111	4	55.205	4	50.8605	0.952738	0.950391	0.959073
solcap_snp_sl_2191	4	55.3741	4	50.8605	0.952738	0.950391	0.959073
solcap_snp_sl_2189	4	55.3759	4	50.8605	0.952738	0.950391	0.959073
solcap_snp_sl_23303	4	55.4635	4	50.8605	0.952738	0.950391	0.959073
solcap_snp_sl_2183	4	55.476	4	50.8605	0.952738	0.950391	0.959073
solcap_snp_sl_2182	4	55.4761	4	50.8605	0.952738	0.950391	0.959073
solcap_snp_sl_2180	4	55.4766	4	50.8605	0.952738	0.950391	0.959073
solcap_snp_sl_2179	4	55.477	4	50.8605	0.952738	0.950391	0.959073
solcap_snp_sl_43402	4	56.9159	4	56.3955	0.122951	0.115702	1
solcap_snp_sl_11564	4	57.5578	4	60.8461	0.815603	0.814947	0.987706
solcap_snp_sl_11563	4	57.5578	4	60.8461	0.815603	0.814947	0.987706
solcap_snp_sl_11562	4	57.5932	4	60.8461	0.801418	0.800712	0.968975
3300_2_293_b_3300_2_283	4	57.6108	4	60.8461	0.834532	0.833935	0.991606
solcap_snp_sl_11545	4	57.6612	4	60.8461	0.807143	0.806452	0.976999
solcap_snp_sl_25693	4	57.7099	4	60.8461	0.807143	0.806452	0.976999
solcap_snp_sl_69260	4	57.7102	4	60.8461	0.807143	0.806452	0.976999
solcap_snp_sl_11536	4	57.7402	4	60.8461	0.807143	0.806452	0.976999
solcap_snp_sl_11535	4	57.7402	4	60.8461	0.807143	0.806452	0.976999
solcap_snp_sl_11534	4	57.7405	4	60.8461	0.807143	0.806452	0.976999
solcap_snp_sl_11533	4	57.7414	4	60.8461	0.807143	0.806452	0.976999
solcap_snp_sl_11532	4	57.7728	4	61.1173	0.804965	0.80427	0.974008
solcap_snp_sl_11530	4	57.7774	4	61.1173	0.801418	0.800712	0.968975
solcap_snp_sl_69255	4	57.8146	4	61.1173	0.810714	0.810036	0.981722
solcap_snp_sl_25690	4	57.817	4	61.1173	0.810714	0.810036	0.981722
solcap_snp_sl_11525	4	57.8261	4	61.1173	0.810714	0.810036	0.981722
solcap_snp_sl_11522	4	57.8636	4	61.6689	0.810714	0.810036	0.981722
solcap_snp_sl_11520	4	57.8645	4	61.6689	0.810714	0.810036	0.981722
SGN-U318488_C2_At1g78230_snp247	4	57.865	4	61.6689	0.804965	0.80427	0.974008
solcap_snp_sl_11518	4	57.8703	4	61.6689	0.810714	0.810036	0.981722
solcap_snp_sl_11517	4	57.8767	4	61.6689	0.810714	0.810036	0.981722
solcap_snp_sl_15930	4	57.9387	4	62.4924	0.895683	0.895307	0.963107
solcap_snp_sl_36806	4	58.0279	4	63.0441	0.889286	0.888889	0.957349
solcap_snp_sl_11512	4	58.0282	4	63.0441	0.890071	0.88968	0.958071
solcap_snp_sl_11509	4	58.0477	4	63.0441	0.83813	0.837545	0.985503
solcap_snp_sl_3957	4	63.2576	4	90.5464	0.323741	0.3213	0.983333
solcap_snp_sl_3963	4	63.2585	4	90.5464	0.323741	0.3213	0.983333
SGN-U565045_snp130	4	63.2595	4	90.5464	0.328571	0.326165	0.987172
solcap_snp_sl_3967	4	63.2615	4	90.5464	0.317857	0.315412	0.977879
solcap_snp_sl_3970	4	63.267	4	90.5464	0.333333	0.330961	0.990384
solcap_snp_sl_4051	4	63.5742	4	92.1753	0.837635	0.818626	0.967475
CL017464-0100	5	3.41616	5	25.3638	0.116667	0.109244	0.994846
solcap_snp_sl_23756	5	3.82245	5	28.6561	0.68308	0.661538	0.964767
CL017677-0317	5	3.82265	5	28.6561	0.687089	0.665806	0.971046
solcap_snp_sl_23751	5	3.82346	5	28.6561	0.685733	0.664362	0.968951
solcap_snp_sl_23750	5	3.82383	5	28.6561	0.683559	0.662026	0.965497
solcap_snp_sl_23749	5	3.82406	5	28.6561	0.685733	0.664362	0.968951
solcap_snp_sl_48901	5	3.93332	5	29.1986	0.708397	0.671147	0.975809
solcap_snp_sl_23738	5	3.93452	5	29.1986	0.708751	0.689015	0.996798
solcap_snp_sl_23737	5	3.93453	5	29.1986	0.715709	0.696466	1
solcap_snp_sl_48900	5	3.94842	5	29.1986	0.71223	0.69274	0.999512
solcap_snp_sl_48898	5	3.94936	5	29.1986	0.705036	0.667314	0.973198
solcap_snp_sl_23735	5	3.95667	5	29.4698	0.705036	0.667314	0.973198
solcap_snp_sl_23734	5	3.98085	5	29.4698	0.701675	0.663481	0.967658
solcap_snp_sl_23733	5	3.9873	5	29.4698	0.700234	0.661846	0.965228
solcap_snp_sl_23731	5	3.98766	5	29.4698	0.701675	0.663481	0.967658
solcap_snp_sl_23726	5	4.03584	5	29.741	0.701793	0.681565	0.990994
CL017150-0184_solcap_snp_sl_50870	5	6.24529	5	42.6564	0.139286	0.136201	1
solcap_snp_sl_50872	5	6.2475	5	42.6564	0.135036	0.131868	1
solcap_snp_sl_13798	5	8.15664	5	47.05	0.55295	0.522261	0.98565
SL10639_108	5	8.21515	5	47.3212	0.549062	0.518115	0.990063
solcap_snp_sl_51118	5	9.82219	5	47.8637	0.55648	0.526036	0.990919
solcap_snp_sl_51121	5	10.038	5	48.1349	0.55295	0.522261	0.98565
solcap_snp_sl_51126	5	10.1125	5	48.1349	0.55295	0.522261	0.98565
solcap_snp_sl_51127	5	10.2949	5	48.1349	0.55607	0.52561	0.990364
solcap_snp_sl_51446	5	58.0473	5	48.1349	0.55607	0.52561	0.990364
solcap_snp_sl_37155	5	59.8233	5	49.7623	0.684908	0.663463	0.967631
solcap_snp_sl_37167	5	59.912	5	50.314	0.706127	0.685875	0.995023
solcap_snp_sl_51	5	60.3288	5	52.5156	0.895997	0.889584	0.957983
solcap_snp_sl_22604	5	60.7232	5	55.5302	0.918402	0.910615	0.965488
solcap_snp_sl_22620	5	61.016	5	58.0135	0.945336	0.942457	0.954156
solcap_snp_sl_22623	5	61.0335	5	58.0135	0.945336	0.942457	0.954156
solcap_snp_sl_37199	5	61.0384	5	58.0135	0.949063	0.946452	0.956662
solcap_snp_sl_37200	5	61.0402	5	58.0135	0.945609	0.942751	0.954342
solcap_snp_sl_37247	5	61.53	5	61.8985	0.346429	0.344086	0.996472
solcap_snp_sl_19915	6	41.0083	6	50.8576	0.529412	0.524752	0.997345
solcap_snp_sl_31729	6	44.5417	6	63.2009	0.341667	0.336134	0.993236
CL015323-0211	8	56.2232	8	46.4498	0.344345	0.320077	0.982273
solcap_snp_sl_34713	8	56.3556	8	47.2773	0.344825	0.320251	0.982426
solcap_snp_sl_21429	8	57.3362	8	53.32	0.362069	0.356522	0.993987
solcap_snp_sl_21430	8	57.361	8	53.32	0.37069	0.365217	0.997583
solcap_snp_sl_64810	8	58.3075	8	56.339	0.106557	0.099174	0.969553
solcap_snp_sl_21456	8	58.31	8	56.339	0.110169	0.102564	0.979748
solcap_snp_sl_65244	8	60.2759	8	63.7555	0.541772	0.524905	0.997483
solcap_snp_sl_31883	9	17.8815	9	22.175	0.349057	0.342857	0.98434
solcap_snp_sl_30380	9	43.1313	9	22.175	0.333333	0.327434	0.988076
solcap_snp_sl_69927	9	66.827	9	71.0241	0.130276	0.099655	0.971084
CL015904-0285	9	67.3837	9	72.1187	0.339629	0.315648	0.978115
solcap_snp_sl_20950	11	3.55922	11	26.2878	0.67295	0.660854	0.963737
CL017088-0089	11	3.6525	11	26.2878	0.83682	0.830966	0.985461
solcap_snp_sl_20963	11	3.65298	11	26.2878	0.83682	0.830966	0.985461
solcap_snp_sl_20982	11	3.72124	11	26.8393	0.834175	0.828199	0.985416
SL1_00sc6004_2094360_solcap_snp_sl_44897	11	52.2802	11	85.2675	0.364407	0.358974	0.995195
solcap_snp_sl_58718	unknown	unknown	4	55.8442	0.375	0.369748	0.998737
solcap_snp_sl_69236	unknown	unknown	5	58.0135	0.907595	0.897893	0.965361
1Pairwise estimates of expected heterozygosity and Fst from the Lositan software [26,27]
